# Supplementary material for: Metagenomic Insights Into the Taxonomic and Functional Features of Kinema, a Traditional Fermented Soybean Product of Sikkim Himalaya
Source: Front Microbiol. 2019 Aug 2;10:1744. doi: 10.3389/fmicb.2019.01744 (PMC6688588; doi:10.3389/fmicb.2019.01744)
Supplement: Supplementary file 6 [file Table_6.XLSX]

## Sheet: SO
Supplementary Table S6. MetaPhinder derived identification of bacteriophage signatures in the metagenomics scaffolds (SO)
query acc.ver	subject acc.ver	% identity	alignment length	mismatches	gap opens	q. start	q. end	s. start	s. end	evalue	bit score
Scaffold_1	KF021268	100	24	0	0	2673	2696	91736	91759	0.024	44.6
Scaffold_10	NC_021561	81.25	48	9	0	1292	1339	8655	8702	0.005	46.4
Scaffold_10	AP013371	88.571	35	4	0	3301	3335	24008	23974	0.005	46.4
Scaffold_1000	NC_012697	92.593	27	2	0	74	100	19582	19608	0.022	41
Scaffold_10002	NC_015262	90.625	32	2	1	251	281	23000	23031	0.037	41
Scaffold_10003	DQ222855	92.857	28	2	0	949	976	34282	34309	0.019	42.8
Scaffold_10004	DQ004855	75.806	62	12	2	37	95	124011	124072	0.042	39.2
Scaffold_10004	AP013559	90.323	31	2	1	173	202	20454	20424	0.042	39.2
Scaffold_10004	AP013487	92.857	28	1	1	61	87	5027	5000	0.042	39.2
Scaffold_10004	AP013486	92.857	28	1	1	61	87	23439	23466	0.042	39.2
Scaffold_10005	NC_023574	75.806	62	15	0	482	543	43846	43907	0.002	44.6
Scaffold_10005	AP013400	85.714	35	5	0	157	191	7816	7782	0.023	41
Scaffold_10007	AP013521	82.222	45	5	2	103	145	24418	24461	0.041	39.2
Scaffold_10008	6.66667e+06	85.106	47	3	3	1079	1125	26377	26335	0.013	44.6
Scaffold_1001	NC_023584	82.5	40	3	1	114	149	60412	60451	0.013	41
Scaffold_10014	NC_023568	87.879	33	4	0	100	132	32472	32440	0.048	42.8
Scaffold_10016	NC_008199	84.211	38	6	0	967	1004	68184	68221	0.037	42.8
Scaffold_10016	6.66667e+06	84.211	38	6	0	967	1004	67836	67873	0.037	42.8
Scaffold_10018	NC_019507	96.154	26	1	0	145	170	137509	137534	0.003	42.8
Scaffold_1002	NC_023584	82.5	40	3	1	182	217	60451	60412	0.013	41
Scaffold_10023	NC_023582	100	23	0	0	402	424	43007	43029	0.009	42.8
Scaffold_10023	NC_021331	88.235	34	1	1	163	196	39733	39703	0.009	42.8
Scaffold_10023	AJ245616	100	22	0	0	155	176	3080	3101	0.03	41
Scaffold_10025	NC_019508	90.625	32	2	1	450	481	28665	28635	0.028	41
Scaffold_10025	NC_019506	90.625	32	2	1	450	481	28910	28880	0.028	41
Scaffold_10025	JF767210	90.625	32	2	1	450	481	29237	29207	0.028	41
Scaffold_10025	AP013512	88.235	34	3	1	527	560	8521	8553	0.028	41
Scaffold_10026	NC_024125	75.714	70	12	2	354	419	97976	98044	0.001	46.4
Scaffold_10026	NC_019399	75.714	70	12	2	354	419	111914	111982	0.001	46.4
Scaffold_10026	JX128259	75.714	70	12	2	354	419	111934	112002	0.001	46.4
Scaffold_10026	HE956711	75.714	70	12	2	354	419	110826	110894	0.001	46.4
Scaffold_10026	AP011113	75.714	70	12	2	354	419	111122	111190	0.001	46.4
Scaffold_10026	NC_019507	90.625	32	3	0	1041	1072	148554	148585	0.005	44.6
Scaffold_10026	FN667789	90.625	32	3	0	1041	1072	132189	132158	0.005	44.6
Scaffold_10026	FN667788	90.625	32	3	0	1041	1072	131436	131405	0.005	44.6
Scaffold_10026	NC_021325	86.111	36	5	0	1163	1198	35803	35768	0.017	42.8
Scaffold_10027	NC_022763	88.571	35	3	1	26	59	8980	8946	0.003	42.8
Scaffold_10027	HM246720	76.364	55	13	0	88	142	20841	20787	0.011	41
Scaffold_10028	AP013485	90.625	32	3	0	602	633	20956	20987	0.002	44.6
Scaffold_1003	KJ473422	93.103	29	2	0	1597	1625	33211	33183	0.011	44.6
Scaffold_1003	NC_019515	86.111	36	5	0	2484	2519	5253	5288	0.037	42.8
Scaffold_1003	NC_008364	92.857	28	2	0	1822	1849	17644	17617	0.037	42.8
Scaffold_1003	AP013406	87.879	33	4	0	1710	1742	2810	2778	0.037	42.8
Scaffold_10033	NC_015279	90.323	31	3	0	1273	1303	153972	154002	0.025	42.8
Scaffold_10035	NC_023719	81.633	49	8	1	1278	1326	222429	222476	0.007	44.6
Scaffold_10037	NC_013598	72.143	140	25	6	1925	2057	31940	31808	1.04e-07	62.6
Scaffold_10037	NC_002072	72.143	140	25	6	1925	2057	29694	29562	1.04e-07	62.6
Scaffold_10037	NC_007019	70.504	139	29	5	1925	2057	31848	31716	1.55e-05	55.4
Scaffold_10037	NC_004303	70.504	139	29	5	1925	2057	8510	8378	1.55e-05	55.4
Scaffold_10037	NC_002214	70.504	139	29	5	1925	2057	34918	34786	1.55e-05	55.4
Scaffold_10037	NC_000872	70.504	139	29	5	1925	2057	34151	34019	1.55e-05	55.4
Scaffold_10037	NC_000871	70.504	139	29	5	1925	2057	32923	32791	1.55e-05	55.4
Scaffold_10037	NC_022776	71.287	101	29	0	2276	2376	8579	8479	0.000189	51.8
Scaffold_10037	NC_008721	86.842	38	5	0	3487	3524	20270	20233	0.008	46.4
Scaffold_10037	NC_023582	88.889	36	3	1	1581	1616	74381	74415	0.028	44.6
Scaffold_10037	NC_019502	72.973	74	20	0	7214	7287	553	480	0.028	44.6
Scaffold_10037	NC_015464	83.333	42	7	0	4796	4837	42171	42212	0.028	44.6
Scaffold_10039	NC_014595	85.714	42	3	2	778	816	5908	5867	0.036	42.8
Scaffold_1004	NC_016163	92.857	28	2	0	330	357	35647	35620	0.028	42.8
Scaffold_10041	NC_009812	88.235	34	4	0	22	55	23917	23950	0.002	44.6
Scaffold_10041	KC295538	92.593	27	2	0	500	526	12565	12539	0.029	41
Scaffold_10043	NC_020081	80	50	6	2	115	161	8319	8367	0.043	41
Scaffold_10043	KF381361	92.593	27	2	0	663	689	55610	55584	0.043	41
Scaffold_10046	NC_020877	86.842	38	5	0	287	324	100995	101032	0.000454	46.4
Scaffold_10046	NC_019511	86.842	38	5	0	287	324	23432	23395	0.000454	46.4
Scaffold_1005	KM083128	85.714	56	8	0	940	995	63088	63143	2.56e-09	66.2
Scaffold_1005	6.66667e+06	81.481	54	10	0	2266	2319	11693	11746	1.62e-05	53.6
Scaffold_1005	6.66667e+06	69.828	116	31	2	1951	2064	11375	11488	0.002	46.4
Scaffold_10050	NC_019401	73.95	119	31	0	3957	4075	150307	150425	8.52e-12	75.2
Scaffold_10050	NC_013195	89.189	37	3	1	2614	2650	19785	19820	0.004	46.4
Scaffold_10050	NC_008617	89.189	37	3	1	2614	2650	18762	18797	0.004	46.4
Scaffold_10050	NC_005356	89.189	37	3	1	2614	2650	1071	1106	0.004	46.4
Scaffold_10050	KJ596420	89.189	37	3	1	2614	2650	18463	18498	0.004	46.4
Scaffold_10050	KF831354	89.189	37	3	1	2614	2650	24538	24503	0.004	46.4
Scaffold_10052	NC_011421	80.682	88	15	2	165	252	28279	28194	5.06e-13	75.2
Scaffold_10052	NC_016163	87.931	58	6	1	175	231	71600	71543	2.15e-11	69.8
Scaffold_10052	NC_023719	86.441	59	7	1	173	231	410985	410928	7.5e-11	68
Scaffold_10052	KF301602	87.719	57	6	1	175	231	143908	143963	7.5e-11	68
Scaffold_10052	KF301602	75.385	65	16	0	170	234	82026	81962	0.000245	46.4
Scaffold_10052	NC_012663	84.127	63	9	1	171	233	59548	59609	2.62e-10	66.2
Scaffold_10052	NC_012663	78.947	57	11	1	175	231	59740	59795	0.000245	46.4
Scaffold_10052	NC_023007	73.881	134	24	7	2	134	148825	148948	3.19e-09	62.6
Scaffold_10052	NC_020081	85.246	61	7	2	172	232	122482	122540	3.19e-09	62.6
Scaffold_10052	KM051843	85.246	61	7	2	172	232	132758	132816	3.19e-09	62.6
Scaffold_10052	HE983844	83.051	59	9	1	173	231	617	560	3.89e-08	59
Scaffold_10052	HE983844	76.667	60	13	1	173	231	779	720	0.003	42.8
Scaffold_10052	NC_023587	80.952	63	11	1	180	242	19556	19495	1.36e-07	57.2
Scaffold_10052	JN797798	81.967	61	10	1	172	232	148734	148793	1.36e-07	57.2
Scaffold_10052	JN797798	79.661	59	11	1	173	231	151564	151621	2.01e-05	50
Scaffold_10052	JN797798	77.049	61	13	1	172	232	148030	148089	0.000856	44.6
Scaffold_10052	JN797798	77.419	62	12	2	172	232	148888	148948	0.003	42.8
Scaffold_10052	HQ317385	76.923	78	17	1	163	240	19345	19269	1.36e-07	57.2
Scaffold_10052	HQ317385	78.571	56	11	1	176	231	19234	19180	0.000856	44.6
Scaffold_10052	NC_023584	82.456	57	9	1	176	232	19698	19643	4.73e-07	55.4
Scaffold_10052	NC_015288	78.571	70	14	1	176	245	163560	163492	4.73e-07	55.4
Scaffold_10052	KF156339	78.571	70	14	1	163	232	19211	19143	4.73e-07	55.4
Scaffold_10052	AF503408	80	65	12	1	176	240	71796	71733	4.73e-07	55.4
Scaffold_10052	AF234173	80	65	12	1	176	240	69168	69105	4.73e-07	55.4
Scaffold_10052	6.66667e+06	80.645	62	11	1	171	232	64830	64890	4.73e-07	55.4
Scaffold_10052	6.66667e+06	78.947	57	11	1	175	231	62306	62251	0.000245	46.4
Scaffold_10052	NC_024205	81.356	59	10	1	173	231	32433	32376	1.65e-06	53.6
Scaffold_10052	NC_024137	81.356	59	10	1	173	231	31076	31019	1.65e-06	53.6
Scaffold_10052	NC_016166	80.328	61	11	1	172	232	13486	13427	1.65e-06	53.6
Scaffold_10052	NC_011273	82.143	56	9	1	176	231	93793	93739	1.65e-06	53.6
Scaffold_10052	NC_011273	76.562	64	13	2	176	239	94770	94709	0.01	41
Scaffold_10052	NC_011273	77.586	58	11	2	176	233	93550	93495	0.036	39.2
Scaffold_10052	NC_004629	78.261	69	14	1	176	244	271755	271822	1.65e-06	53.6
Scaffold_10052	NC_004629	75	64	12	2	171	232	272881	272942	0.036	39.2
Scaffold_10052	GQ478082	82.143	56	9	1	177	232	14901	14847	1.65e-06	53.6
Scaffold_10052	NC_019529	81.034	58	7	2	176	231	38119	38064	2.01e-05	50
Scaffold_10052	NC_019529	78.571	56	11	1	176	231	41780	41726	0.000856	44.6
Scaffold_10052	NC_019529	76.667	60	12	2	173	231	45301	45243	0.036	39.2
Scaffold_10052	NC_018843	82.143	56	8	2	176	231	42585	42532	2.01e-05	50
Scaffold_10052	KC661276	76.812	69	15	1	176	244	66734	66667	2.01e-05	50
Scaffold_10052	KC661276	77.419	62	13	1	171	232	66948	67008	0.000245	46.4
Scaffold_10052	KC661276	77.193	57	12	1	175	231	65034	64979	0.01	41
Scaffold_10052	NC_022971	77.966	59	13	0	173	231	44361	44419	7.03e-05	48.2
Scaffold_10052	NC_022052	80.357	56	10	1	176	231	66009	66063	7.03e-05	48.2
Scaffold_10052	NC_014663	77.778	63	13	1	171	233	79964	80025	7.03e-05	48.2
Scaffold_10052	NC_014663	77.612	67	12	3	180	245	79805	79869	0.003	42.8
Scaffold_10052	NC_013696	80.357	56	10	1	177	232	39706	39652	7.03e-05	48.2
Scaffold_10052	NC_010325	77.966	59	13	0	173	231	44614	44672	7.03e-05	48.2
Scaffold_10052	NC_022343	78.947	57	11	1	175	231	84405	84460	0.000245	46.4
Scaffold_10052	NC_022096	79.31	58	8	2	176	231	122829	122774	0.000245	46.4
Scaffold_10052	NC_020873	75.385	65	16	0	167	231	157670	157734	0.000245	46.4
Scaffold_10052	NC_019929	77.586	58	13	0	176	233	170494	170437	0.000245	46.4
Scaffold_10052	NC_019929	75.385	65	15	1	176	240	169875	169812	0.003	42.8
Scaffold_10052	NC_019530	78.947	57	11	1	175	231	137868	137813	0.000245	46.4
Scaffold_10052	NC_019521	79.31	58	8	2	176	231	1335	1280	0.000245	46.4
Scaffold_10052	NC_019452	78.947	57	11	1	175	231	136755	136700	0.000245	46.4
Scaffold_10052	NC_015287	79.032	62	11	2	172	232	216641	216581	0.000245	46.4
Scaffold_10052	NC_014662	78.947	57	11	1	176	232	69955	70010	0.000245	46.4
Scaffold_10052	NC_014662	77.966	59	8	3	176	231	69839	69895	0.036	39.2
Scaffold_10052	KJ567043	78.947	57	11	1	175	231	78770	78715	0.000245	46.4
Scaffold_10052	JX128257	78.947	57	11	1	175	231	76406	76461	0.000245	46.4
Scaffold_10052	DQ004855	96.429	28	1	0	31	58	129132	129159	0.000245	46.4
Scaffold_10052	NC_024367	78.571	56	11	1	176	231	59243	59297	0.000856	44.6
Scaffold_10052	NC_023717	78.571	56	11	1	176	231	150055	150001	0.000856	44.6
Scaffold_10052	NC_021536	78.571	56	11	1	176	231	9834	9780	0.000856	44.6
Scaffold_10052	NC_021536	74.286	70	16	2	175	244	9958	9891	0.036	39.2
Scaffold_10052	NC_020862	80.392	51	9	1	190	240	70221	70270	0.000856	44.6
Scaffold_10052	NC_008296	78.571	56	11	1	176	231	20139	20085	0.000856	44.6
Scaffold_10052	HQ317290	78.571	56	11	1	176	231	18070	18016	0.000856	44.6
Scaffold_10052	HQ317290	78.378	74	8	6	173	243	18192	18124	0.003	42.8
Scaffold_10052	NC_023579	76.786	56	13	0	176	231	41848	41793	0.003	42.8
Scaffold_10052	NC_019913	76.667	60	13	1	176	235	22907	22849	0.003	42.8
Scaffold_10052	NC_019450	76.667	60	13	1	176	235	24707	24649	0.003	42.8
Scaffold_10052	NC_019406	86.111	36	5	0	173	208	108896	108931	0.003	42.8
Scaffold_10052	NC_015279	78.333	60	11	2	173	231	141019	140961	0.003	42.8
Scaffold_10052	NC_015279	77.966	59	11	2	173	231	141318	141262	0.01	41
Scaffold_10052	NC_006820	74.699	83	16	4	163	243	165219	165140	0.003	42.8
Scaffold_10052	NC_006820	70.968	93	21	3	31	122	119313	119226	0.036	39.2
Scaffold_10052	NC_001335	78.947	57	10	2	175	231	4261	4207	0.003	42.8
Scaffold_10052	NC_023561	74.194	62	16	0	171	232	74618	74679	0.01	41
Scaffold_10052	NC_023561	77.193	57	12	1	176	232	77387	77442	0.01	41
Scaffold_10052	NC_023561	77.966	59	8	3	176	231	77271	77327	0.036	39.2
Scaffold_10052	NC_021788	76.271	59	13	1	173	231	90693	90636	0.01	41
Scaffold_10052	NC_021788	76.271	59	10	2	175	231	89701	89645	0.036	39.2
Scaffold_10052	NC_019721	92.593	27	2	0	38	64	36569	36543	0.01	41
Scaffold_10052	NC_019538	75.806	62	9	2	173	231	199521	199463	0.01	41
Scaffold_10052	NC_018861	77.941	68	11	4	174	240	88802	88866	0.01	41
Scaffold_10052	NC_016571	77.193	57	12	1	175	231	16839	16894	0.01	41
Scaffold_10052	NC_016571	92.308	26	2	0	35	60	16738	16763	0.036	39.2
Scaffold_10052	NC_014595	77.966	59	11	2	176	234	69310	69366	0.01	41
Scaffold_10052	NC_010811	75.362	69	15	2	177	245	186316	186382	0.01	41
Scaffold_10052	NC_006565	90	30	3	0	30	59	52974	53003	0.01	41
Scaffold_10052	AP013398	88.235	34	3	1	198	231	3629	3597	0.01	41
Scaffold_10052	6.66667e+06	74.648	71	16	2	167	237	93544	93476	0.01	41
Scaffold_10052	NC_022771	77.586	58	11	2	176	233	31630	31575	0.036	39.2
Scaffold_10052	NC_021856	77.586	58	11	2	176	233	33810	33755	0.036	39.2
Scaffold_10052	NC_021530	76.19	63	13	2	180	242	18804	18744	0.036	39.2
Scaffold_10052	NC_021529	78.333	60	10	3	173	231	228988	229045	0.036	39.2
Scaffold_10052	NC_020851	76.786	56	12	1	176	231	53752	53806	0.036	39.2
Scaffold_10052	NC_019543	76.786	56	12	1	176	231	63427	63481	0.036	39.2
Scaffold_10052	NC_014661	91.429	35	0	3	198	231	80071	80103	0.036	39.2
Scaffold_10052	JX306041	76.786	56	12	1	176	231	67407	67461	0.036	39.2
Scaffold_10052	AP013399	81.395	43	7	1	200	242	13835	13794	0.036	39.2
Scaffold_10053	NC_015569	95.833	24	1	0	286	309	96028	96051	0.045	39.2
Scaffold_10055	NC_015288	100	24	0	0	2435	2458	171341	171364	0.012	44.6
Scaffold_10055	NC_021853	86.486	37	3	1	2320	2356	28437	28403	0.04	42.8
Scaffold_10055	KC182548	86.486	37	3	1	2320	2356	26602	26568	0.04	42.8
Scaffold_1006	KF021268	79.104	67	10	2	8030	8095	99344	99407	5.83e-05	53.6
Scaffold_10060	AP013496	88.889	36	2	1	463	498	12990	13023	0.004	44.6
Scaffold_10060	NC_018272	96.154	26	1	0	298	323	12886	12911	0.015	42.8
Scaffold_10060	NC_016562	84.615	39	3	1	674	712	124872	124837	0.015	42.8
Scaffold_10060	NC_015464	84.615	39	3	1	674	712	36067	36032	0.015	42.8
Scaffold_10060	KF148616	84.615	39	3	1	674	712	125108	125073	0.015	42.8
Scaffold_10060	FR823450	84.615	39	3	1	674	712	3812	3847	0.015	42.8
Scaffold_10061	NC_021856	80.282	71	10	4	215	283	108221	108153	2.28e-05	51.8
Scaffold_10061	NC_021856	77.465	71	12	4	230	298	108221	108153	0.012	42.8
Scaffold_10061	NC_020081	80.435	46	9	0	235	280	44466	44511	0.012	42.8
Scaffold_10062	NC_018087	87.097	31	4	0	13	43	108341	108311	0.043	39.2
Scaffold_10063	NC_019401	100	22	0	0	185	206	17531	17510	0.043	41
Scaffold_10064	NC_018086	92.593	27	2	0	104	130	1806	1832	0.015	41
Scaffold_10064	JF731128	92.593	27	2	0	104	130	11821	11795	0.015	41
Scaffold_10065	AP013483	88.571	35	4	0	875	909	27457	27423	0.002	46.4
Scaffold_10066	NC_001884	86.726	339	45	0	1	339	10018	10356	6.58e-113	408
Scaffold_10066	NC_007021	82.979	47	6	2	419	464	3554	3599	0.01	42.8
Scaffold_10068	NC_015284	90	30	3	0	101	130	118369	118340	0.009	41
Scaffold_10071	NC_023574	93.333	30	2	0	2739	2768	65629	65658	0.004	46.4
Scaffold_10079	NC_023007	80.851	47	8	1	159	205	35683	35638	0.014	41
Scaffold_10079	NC_019526	87.097	31	4	0	217	247	48608	48578	0.048	39.2
Scaffold_10079	NC_009231	84.211	38	5	1	277	313	26934	26897	0.048	39.2
Scaffold_1008	NC_020490	65.905	613	186	14	57057	57656	1479	2081	1.05e-24	122
Scaffold_1008	NC_020490	82.759	58	6	1	57855	57912	2582	2635	1.05e-05	59
Scaffold_1008	NC_014460	64.921	382	134	0	57057	57438	27286	27667	7.57e-14	86
Scaffold_1008	NC_014460	68.807	218	64	2	57980	58195	28131	28346	9.23e-13	82.4
Scaffold_1008	NC_017968	68.807	218	64	2	57980	58195	6140	5925	9.23e-13	82.4
Scaffold_1008	NC_017968	65.385	390	119	6	57057	57438	6985	6604	9.23e-13	82.4
Scaffold_1008	NC_012784	65.495	313	96	2	57057	57363	2532	2838	3.22e-12	80.6
Scaffold_1008	NC_012784	68.657	201	55	4	57980	58176	3376	3572	2.03e-08	68
Scaffold_1008	NC_011614	65.495	313	96	2	57057	57363	2213	2519	3.22e-12	80.6
Scaffold_1008	NC_011614	68.657	201	55	4	57980	58176	3058	3254	2.03e-08	68
Scaffold_1008	NC_008583	65.495	313	96	2	57057	57363	2383	2689	3.22e-12	80.6
Scaffold_1008	NC_008583	69.154	201	54	4	57980	58176	3228	3424	4.78e-10	73.4
Scaffold_1008	NC_018281	66.426	277	91	2	57057	57332	29511	29786	4.78e-10	73.4
Scaffold_1008	NC_022914	65.818	275	88	2	57059	57330	27931	28202	5.82e-09	69.8
Scaffold_1008	NC_022914	67.757	214	67	2	57964	58176	28760	28972	2.03e-08	68
Scaffold_1008	KF356199	76.25	80	19	0	34501	34580	13529	13450	1.05e-05	59
Scaffold_1008	NC_007052	82.143	56	9	1	57857	57912	31394	31448	0.000448	53.6
Scaffold_1008	NC_005356	82.143	56	9	1	57857	57912	25988	26042	0.000448	53.6
Scaffold_1008	NC_004615	82.143	56	9	1	57857	57912	4356	4410	0.000448	53.6
Scaffold_1008	JX274647	82.143	56	9	1	57857	57912	3794	3848	0.000448	53.6
Scaffold_1008	NC_024205	68.504	127	40	0	61481	61607	81515	81641	0.005	50
Scaffold_1008	NC_019767	80.769	52	4	1	451	496	25846	25795	0.005	50
Scaffold_1008	NC_019720	80.769	52	4	1	451	496	29578	29527	0.005	50
Scaffold_1008	NC_019719	80.769	52	4	1	451	496	27212	27161	0.005	50
Scaffold_1008	NC_018856	68.504	127	40	0	61481	61607	56162	56288	0.005	50
Scaffold_1008	NC_005344	80.769	52	4	1	451	496	23622	23571	0.005	50
Scaffold_1008	JN600960	80.769	52	4	1	451	496	19768	19717	0.005	50
Scaffold_1008	CP000711	80.769	52	4	1	451	496	35571	35622	0.005	50
Scaffold_10083	NC_009815	100	21	0	0	170	190	26342	26322	0.04	39.2
Scaffold_10084	NC_021529	100	22	0	0	64	85	77935	77956	0.011	41
Scaffold_10088	AP013402	80.702	57	7	3	457	510	18129	18184	0.01	44.6
Scaffold_10089	10844.1	89.655	29	3	0	94	122	1417	1445	0.04	39.2
Scaffold_1009	NC_015290	85.366	41	6	0	3807	3847	96287	96247	0.002	48.2
Scaffold_1009	NC_019443	88.571	35	4	0	3807	3841	94173	94139	0.008	46.4
Scaffold_1009	NC_021789	88.235	34	4	0	6530	6563	26180	26147	0.029	44.6
Scaffold_1009	DQ079879	81.818	44	8	0	7493	7536	2346	2389	0.029	44.6
Scaffold_10092	JX306041	88.571	35	4	0	91	125	16919	16953	0.002	46.4
Scaffold_10092	KF554508	88.889	36	3	1	1372	1406	128574	128609	0.005	44.6
Scaffold_10092	KC595512	88.571	35	3	1	1373	1406	22239	22273	0.019	42.8
Scaffold_10094	NC_008723	95.161	62	1	2	274	334	27507	27447	2.16e-17	91.5
Scaffold_10094	NC_011614	90.164	61	6	0	274	334	42235	42175	3.21e-15	84.2
Scaffold_10094	NC_007051	100	27	0	0	272	298	22308	22282	6.62e-05	50
Scaffold_10094	NC_019511	80	50	10	0	710	759	7005	6956	0.000806	46.4
Scaffold_10094	NC_020877	77.778	54	12	0	710	763	112249	112302	0.003	44.6
Scaffold_10095	NC_001884	77.201	693	158	0	72	764	33054	32362	4.72e-152	538
Scaffold_10095	NC_017975	68.394	193	53	4	202	390	73932	73744	9.8e-09	62.6
Scaffold_10097	AP013495	89.655	29	3	0	104	132	18184	18212	0.034	39.2
Scaffold_101	NC_019526	83.333	42	7	0	848	889	300363	300404	0.006	44.6
Scaffold_10101	NC_009231	79.31	58	6	2	6368	6420	36727	36671	0.003	48.2
Scaffold_10101	NC_007581	80	60	7	3	7618	7673	172166	172224	0.01	46.4
Scaffold_10101	NC_007581	78.846	52	11	0	8932	8983	141217	141268	0.034	44.6
Scaffold_10101	NZ_ACSJ01000017	78.846	52	11	0	8932	8983	7692	7743	0.034	44.6
Scaffold_10101	NC_019503	85.366	41	4	1	2532	2570	114740	114700	0.034	44.6
Scaffold_10101	AP013480	89.474	38	2	2	8894	8931	30687	30722	0.034	44.6
Scaffold_10102	NC_019490	86.047	43	6	0	293	335	20415	20373	2.18e-05	51.8
Scaffold_10105	NC_023574	81.818	55	9	1	1592	1645	118208	118154	5.28e-05	51.8
Scaffold_10105	NC_015263	78.182	55	11	1	1592	1645	104343	104289	0.027	42.8
Scaffold_10110	NC_019448	68.809	3392	889	66	408	3723	45899	42601	0	1202
Scaffold_10110	NC_019448	71.154	988	264	11	4017	4997	42598	41625	1.88e-129	466
Scaffold_10110	NC_019448	69.714	175	52	1	5348	5522	41265	41092	4.17e-11	73.4
Scaffold_10110	EU418428	68.659	3379	916	58	408	3723	45547	42249	0	1187
Scaffold_10110	EU418428	71.992	989	255	12	4017	4997	42246	41272	9.12e-140	500
Scaffold_10110	EU418428	69.714	175	52	1	5348	5522	40913	40740	4.17e-11	73.4
Scaffold_10110	EU418428	83.333	48	4	1	3924	3967	103255	103208	0.000476	50
Scaffold_10110	AY176327	68.659	3379	916	58	408	3723	38497	35199	0	1187
Scaffold_10110	AY176327	72.093	989	254	12	4017	4997	35196	34222	2.15e-141	506
Scaffold_10110	AY176327	69.714	175	52	1	5348	5522	33863	33690	4.17e-11	73.4
Scaffold_10110	AY176327	83.333	48	4	1	3924	3967	96198	96151	0.000476	50
Scaffold_10110	NC_022918	68.778	3363	897	64	429	3723	48635	45358	0	1180
Scaffold_10110	NC_022918	71.862	988	257	11	4017	4997	45355	44382	3.18e-139	499
Scaffold_10110	NC_022918	69.714	175	52	1	5348	5522	44022	43849	4.17e-11	73.4
Scaffold_10110	NC_019726	68.615	3387	913	63	408	3723	42437	45744	0	1168
Scaffold_10110	NC_019726	71.862	988	257	11	4017	4997	45747	46720	3.18e-139	499
Scaffold_10110	NC_019726	69.714	175	52	1	5348	5522	47080	47253	4.17e-11	73.4
Scaffold_10110	NC_019726	83.333	48	4	1	3924	3967	126373	126420	0.000476	50
Scaffold_10110	KF021268	69.84	1996	543	25	1929	3890	3828	1858	0	827
Scaffold_10110	KF021268	65.329	972	289	22	4373	5331	139923	138987	1.36e-42	178
Scaffold_10110	KF021268	78.191	188	41	0	4178	4365	188	1	1.55e-35	154
Scaffold_10110	KF021268	67.692	520	121	19	807	1310	4929	4441	1.19e-30	138
Scaffold_10110	KF021268	80.909	110	19	1	3917	4024	302	193	8.59e-20	102
Scaffold_10110	KF021268	77.358	106	24	0	4064	4169	1615	1510	2.31e-14	84.2
Scaffold_10110	KF021268	90.244	41	3	1	3736	3776	17368	17329	3.9e-05	53.6
Scaffold_10110	NC_020877	74.318	1137	284	6	2405	3537	3757	2625	0	715
Scaffold_10110	NC_020877	77.407	270	50	6	3552	3817	2104	1842	5.07e-48	196
Scaffold_10110	NC_020877	65.778	900	236	27	451	1313	6968	6104	1.36e-42	178
Scaffold_10110	NC_020877	74.088	274	64	3	3832	4101	1049	779	2.46e-39	167
Scaffold_10110	NC_020877	66.107	655	203	10	4363	5009	131331	130688	5.42e-35	152
Scaffold_10110	NC_020877	75.369	203	50	0	4163	4365	203	1	9.79e-32	141
Scaffold_10110	NC_020877	80.328	61	12	0	3830	3890	2294	2234	3.2e-06	57.2
Scaffold_10110	NC_020877	65	320	103	6	5199	5511	130489	130172	3.9e-05	53.6
Scaffold_10110	NC_020877	83.721	43	7	0	4112	4154	515	473	0.006	46.4
Scaffold_10110	NC_020877	78.182	55	12	0	3836	3890	662	608	0.006	46.4
Scaffold_10110	NC_007021	72.855	851	217	8	2291	3134	2107	1264	1.54e-130	470
Scaffold_10110	NC_007021	73.432	542	137	4	3185	3724	130607	130071	2.15e-84	316
Scaffold_10110	NC_007021	69.326	564	152	8	4163	4719	128409	127860	1.27e-55	221
Scaffold_10110	NC_007021	66.968	442	137	1	805	1237	3551	3110	2.81e-32	143
Scaffold_10110	NC_007021	72.078	154	35	4	1929	2081	2446	2300	4.17e-11	73.4
Scaffold_10110	NC_007021	74.286	105	25	2	5167	5270	127428	127325	2.63e-07	60.8
Scaffold_10110	NC_007021	80	65	7	3	3829	3890	128912	128851	0.000136	51.8
Scaffold_10110	NC_019511	72.977	692	181	6	2291	2979	117518	118206	1.76e-104	383
Scaffold_10110	NC_019511	71.016	797	203	18	3034	3817	119563	120344	1.89e-91	340
Scaffold_10110	NC_019511	68.327	843	246	10	4178	5009	121246	122078	8.57e-77	291
Scaffold_10110	NC_019511	77.536	276	54	6	3735	4006	120949	121220	4.16e-49	199
Scaffold_10110	NC_019511	65.827	913	239	28	451	1326	115684	116560	3.9e-43	179
Scaffold_10110	NC_019511	70.813	209	54	1	3968	4169	120735	120943	2.46e-20	104
Scaffold_10110	NC_019511	65	320	103	6	5199	5511	122277	122594	3.9e-05	53.6
Scaffold_10110	AB609718	65.866	1415	397	27	2989	4344	2528	1141	9.77e-89	331
Scaffold_10110	AB609718	70.946	148	31	5	1951	2087	3639	3493	7.54e-08	62.6
Scaffold_10110	DQ004855	65.466	1083	320	25	2540	3595	3008	1953	3.41e-50	203
Scaffold_10110	DQ004855	72.159	176	43	3	3831	4004	1583	1412	5.42e-16	89.7
Scaffold_10110	DQ004855	82.105	95	10	3	3917	4004	55155	55061	1.89e-15	87.8
Scaffold_10110	DQ004855	75.281	89	15	5	3733	3817	1736	1651	0.006	46.4
Scaffold_10110	NC_015253	73.93	257	55	9	3727	3980	31210	31457	5.07e-29	132
Scaffold_10110	NC_015253	73.725	255	55	9	3729	3980	30563	30808	6.18e-28	129
Scaffold_10110	NC_015253	70.356	253	57	8	3726	3972	31644	31884	1.05e-18	98.7
Scaffold_10110	NC_015253	72.17	212	47	7	3764	3972	32054	32256	3.65e-18	96.9
Scaffold_10110	NC_015253	89.655	58	6	0	3923	3980	82340	82283	9.8e-13	78.8
Scaffold_10110	NC_015253	65.414	266	92	0	4064	4329	32567	32832	6.19e-09	66.2
Scaffold_10110	NC_020081	77.011	174	35	4	3834	4004	128281	128110	3.2e-25	120
Scaffold_10110	NC_020081	71.094	128	37	0	3007	3134	128850	128723	2.16e-08	64.4
Scaffold_10110	JN797798	75.294	170	42	0	4022	4191	1990	1821	1.12e-24	118
Scaffold_10110	JN797798	66.81	232	67	5	3035	3261	2653	2427	9.18e-07	59
Scaffold_10110	NC_024211	73.333	165	44	0	4022	4186	29509	29673	3e-19	100
Scaffold_10110	NC_024211	72.826	92	24	1	2443	2533	28254	28345	0.000476	50
Scaffold_10110	NC_024137	72.832	173	47	0	4020	4192	26313	26485	3e-19	100
Scaffold_10110	NC_024137	68.966	116	36	0	2399	2514	25016	25131	0.002	48.2
Scaffold_10110	NC_018857	73.333	165	44	0	4022	4186	1953	1789	3e-19	100
Scaffold_10110	NC_018857	75	80	14	2	3185	3261	2466	2390	0.000136	51.8
Scaffold_10110	KJ489402	72.353	170	47	0	4020	4189	23729	23898	1.27e-17	95.1
Scaffold_10110	KJ489402	66.029	209	71	0	3362	3570	23365	23573	3.2e-06	57.2
Scaffold_10110	NC_022763	67.559	299	87	4	4063	4355	26706	27000	4.45e-17	93.3
Scaffold_10110	NC_022763	62.982	570	169	13	3007	3570	25974	26507	3.2e-06	57.2
Scaffold_10110	NC_022769	71.765	170	48	0	4020	4189	26107	26276	1.55e-16	91.5
Scaffold_10110	NC_022769	67.464	209	68	0	3362	3570	25743	25951	1.45e-10	71.6
Scaffold_10110	6.66667e+06	65.957	329	104	3	4020	4344	1817	1493	8.05e-14	82.4
Scaffold_10110	6.66667e+06	63.333	570	167	12	3007	3570	2506	1973	5.08e-10	69.8
Scaffold_10110	NC_020873	70.349	172	51	0	4020	4191	4190	4019	2.81e-13	80.6
Scaffold_10110	NC_020873	68.852	183	51	2	3391	3570	4525	4346	5.08e-10	69.8
Scaffold_10110	NC_016563	76.699	103	24	0	3185	3287	3676	3778	9.8e-13	78.8
Scaffold_10110	NC_016563	67.213	183	54	4	3391	3570	3852	4031	0.002	48.2
Scaffold_10110	NC_012530	68.718	195	41	5	3832	4006	54491	54685	4.17e-11	73.4
Scaffold_10110	NC_012530	69.925	133	40	0	3354	3486	51303	51435	2.63e-07	60.8
Scaffold_10110	NC_012530	66.818	220	50	7	3805	4002	50257	50475	3.2e-06	57.2
Scaffold_10110	NC_012530	66.667	249	58	10	3736	3972	50716	50951	3.9e-05	53.6
Scaffold_10110	NC_012530	77.966	59	13	0	3185	3243	51131	51189	0.002	48.2
Scaffold_10110	NC_024205	68.396	212	61	4	3362	3570	27591	27799	1.77e-09	68
Scaffold_10110	NC_024205	64.961	254	89	0	3008	3261	27267	27520	3.2e-06	57.2
Scaffold_10110	NC_024205	68.707	147	43	3	2390	2534	26649	26794	0.002	48.2
Scaffold_10110	NC_022771	77.381	84	19	0	3178	3261	25579	25662	6.19e-09	66.2
Scaffold_10110	NC_022771	80.851	47	9	0	1928	1974	23820	23866	0.02	44.6
Scaffold_10110	NC_022771	86.486	37	5	0	3762	3798	24966	25002	0.02	44.6
Scaffold_10110	NC_018856	67.925	212	62	4	3362	3570	1079	1287	2.16e-08	64.4
Scaffold_10110	NC_018856	68.707	147	43	3	2390	2534	137	282	0.002	48.2
Scaffold_10110	NC_006565	69.62	158	44	2	3419	3574	97603	97758	2.16e-08	64.4
Scaffold_10110	NC_006565	81.034	58	9	2	3190	3246	97404	97460	0.002	48.2
Scaffold_10110	NC_021856	76.19	84	20	0	3178	3261	27677	27760	7.54e-08	62.6
Scaffold_10110	NC_021856	82.609	46	8	0	1929	1974	26296	26341	0.002	48.2
Scaffold_10110	NC_023574	93.103	29	2	0	2217	2245	22355	22383	0.02	44.6
Scaffold_10110	NC_011421	90.625	32	3	0	2726	2757	24224	24193	0.02	44.6
Scaffold_10110	NC_007581	83.333	48	6	2	2200	2246	118758	118804	0.02	44.6
Scaffold_1012	NC_009819	78.689	61	10	1	665	722	13931	13871	0.000102	50
Scaffold_10124	NC_021856	74.576	531	132	1	1397	1927	91233	91760	4.25e-94	347
Scaffold_10124	NC_022771	74.388	531	133	1	1397	1927	87566	88093	5.18e-93	343
Scaffold_10124	NC_001884	74.433	485	119	4	1444	1927	120816	121296	1.59e-80	302
Scaffold_10124	NC_020081	74.828	437	102	3	1495	1927	62361	61929	1.22e-75	286
Scaffold_10124	KM051843	73.51	453	112	2	1479	1927	70421	69973	2.21e-72	275
Scaffold_10124	NC_019487	69.471	416	127	0	1497	1912	103217	103632	4.55e-43	178
Scaffold_10124	NC_023007	66.287	439	145	1	1477	1912	67212	67650	8.8e-27	123
Scaffold_10124	NC_015263	66.774	310	99	4	1518	1825	63756	64063	9.4e-14	80.6
Scaffold_10124	NC_023574	66.346	312	97	5	1518	1825	67778	68085	4e-12	75.2
Scaffold_10124	KC595511	65.891	258	82	3	1521	1775	59747	59493	8.81e-08	60.8
Scaffold_10124	AB609718	69.841	126	36	2	1497	1621	133858	133734	0.000159	50
Scaffold_10124	NC_019708	90.323	31	3	0	1787	1817	23887	23857	0.024	42.8
Scaffold_10124	NC_019705	90.323	31	3	0	1787	1817	23817	23787	0.024	42.8
Scaffold_10124	NC_016160	90.323	31	3	0	1787	1817	24542	24512	0.024	42.8
Scaffold_10124	NC_015253	71	100	27	2	1533	1631	81645	81743	0.024	42.8
Scaffold_10124	NC_005344	90.323	31	3	0	1787	1817	22037	22007	0.024	42.8
Scaffold_10124	JN600960	90.323	31	3	0	1787	1817	18183	18153	0.024	42.8
Scaffold_10128	AP013443	100	21	0	0	195	215	3658	3638	0.049	39.2
Scaffold_10133	NC_006820	83.333	42	7	0	126	167	153373	153332	0.005	44.6
Scaffold_10134	KC295538	90	30	3	0	60	89	277587	277616	0.039	41
Scaffold_10139	NC_009813	92.857	28	2	0	81	108	18220	18193	0.004	42.8
Scaffold_10142	NC_021539	79.31	58	9	2	387	444	95	149	0.005	44.6
Scaffold_10142	AP013454	90.625	32	3	0	1140	1171	29524	29493	0.005	44.6
Scaffold_10143	AP013454	90.625	32	3	0	370	401	29524	29493	0.002	44.6
Scaffold_10143	NC_014457	90.625	32	2	1	515	545	46760	46791	0.028	41
Scaffold_10144	NC_023719	68.595	121	38	0	371	491	181180	181060	0.000193	48.2
Scaffold_10144	NC_014660	96.296	27	1	0	466	492	8974	9000	0.002	44.6
Scaffold_10144	NC_020416	92.857	28	2	0	466	493	3331	3358	0.008	42.8
Scaffold_10144	NC_014260	92.593	27	2	0	466	492	3358	3384	0.029	41
Scaffold_10145	NC_008689	78.182	55	12	0	1003	1057	41391	41337	0.001	46.4
Scaffold_10145	665883	96.552	29	0	1	888	916	18753	18780	0.004	44.6
Scaffold_10146	NC_008689	78.431	51	11	0	602	652	41387	41337	0.011	42.8
Scaffold_10146	665883	96.296	27	0	1	485	511	18755	18780	0.037	41
Scaffold_10148	NC_019511	100	21	0	0	135	155	31735	31715	0.029	39.2
Scaffold_10149	NC_010105	86.111	36	2	1	293	328	158338	158306	0.043	41
Scaffold_10150	NC_023581	80	50	9	1	684	732	22076	22125	0.02	42.8
Scaffold_10151	FN667789	92.308	26	2	0	188	213	125810	125835	0.048	39.2
Scaffold_10153	GQ478087	82	50	9	0	1	50	3342	3293	2.35e-05	50
Scaffold_10153	GQ478085	82	50	9	0	1	50	3342	3293	2.35e-05	50
Scaffold_10153	GQ478082	82	50	9	0	1	50	3346	3297	2.35e-05	50
Scaffold_10153	NC_023574	90.323	31	1	1	248	278	126221	126249	0.012	41
Scaffold_10154	NC_009018	81.132	53	10	0	2150	2202	2885	2937	6.88e-05	51.8
Scaffold_10154	NC_006557	70.27	111	33	0	2093	2203	3034	3144	6.88e-05	51.8
Scaffold_10154	NC_007581	79.688	64	11	2	188	250	3538	3476	0.00024	50
Scaffold_10154	NC_023718	90.909	33	2	1	1393	1425	21736	21767	0.036	42.8
Scaffold_10154	NC_019421	100	23	0	0	91	113	32242	32264	0.036	42.8
Scaffold_10157	NC_023719	93.103	29	2	0	109	137	211274	211302	0.002	44.6
Scaffold_10159	AP013394	87.097	31	4	0	51	81	28063	28093	0.04	39.2
Scaffold_10160	GQ478087	88.694	628	62	4	2802	3428	3168	2549	0	803
Scaffold_10160	GQ478087	76.602	359	81	1	1595	1953	6427	6072	5.86e-70	268
Scaffold_10160	GQ478087	82.432	74	9	1	2989	3062	4665	4596	7.16e-12	75.2
Scaffold_10160	GQ478085	88.694	628	62	4	2802	3428	3168	2549	0	803
Scaffold_10160	GQ478085	76.696	339	79	0	1615	1953	6349	6011	3.7e-66	255
Scaffold_10160	GQ478085	82.432	74	9	1	2989	3062	4665	4596	7.16e-12	75.2
Scaffold_10160	GQ478082	89.731	594	51	5	2837	3428	3134	2549	0	783
Scaffold_10160	GQ478082	76.696	339	79	0	1615	1953	5757	5419	3.7e-66	255
Scaffold_10160	GQ478082	82.432	74	9	1	2989	3062	4669	4600	7.16e-12	75.2
Scaffold_10160	NC_015252	69.131	541	159	6	914	1449	28326	27789	2.05e-50	203
Scaffold_10160	KC348604	68.893	569	164	9	883	1444	7813	7251	2.49e-49	199
Scaffold_10160	KC348604	80	55	11	0	458	512	9390	9336	0.000285	50
Scaffold_10160	JX409894	67.634	448	123	7	962	1398	38213	38649	1.68e-32	143
Scaffold_10160	JX409894	68.966	174	48	4	212	382	37429	37599	5.5e-07	59
Scaffold_10160	JX409894	68.421	133	34	2	447	575	37670	37798	0.000285	50
Scaffold_10160	NC_019486	65.263	475	150	9	950	1412	35682	35211	3.96e-15	86
Scaffold_10160	NC_019486	87.5	40	5	0	285	324	36401	36362	0.000285	50
Scaffold_10160	NC_022770	71.681	113	32	0	1300	1412	31862	31750	1.58e-07	60.8
Scaffold_10160	NC_021773	76.389	72	17	0	973	1044	19834	19763	2.34e-05	53.6
Scaffold_10160	NC_017968	76.389	72	17	0	973	1044	533	604	2.34e-05	53.6
Scaffold_10160	NC_008617	76.389	72	17	0	973	1044	11000	10929	2.34e-05	53.6
Scaffold_10160	JX274647	76.389	72	17	0	973	1044	9697	9626	2.34e-05	53.6
Scaffold_10160	JX274646	76.389	72	17	0	973	1044	9472	9401	2.34e-05	53.6
Scaffold_10160	KF669657	69.912	113	34	0	1300	1412	31808	31696	8.17e-05	51.8
Scaffold_10160	NC_004586	78.125	64	13	1	212	274	7259	7196	0.000285	50
Scaffold_10160	NC_004586	68.067	119	30	2	446	560	7019	6905	0.042	42.8
Scaffold_10160	NC_024370	96.296	27	1	0	1737	1763	17103	17129	0.012	44.6
Scaffold_10160	NC_024357	96.296	27	1	0	1737	1763	15895	15921	0.012	44.6
Scaffold_10160	NC_013644	77.027	74	11	4	2989	3058	19704	19633	0.012	44.6
Scaffold_10161	NC_022791	69.803	659	189	4	9	662	23013	23666	2.4e-74	282
Scaffold_10161	NC_012756	69.111	641	198	0	22	662	6826	6186	6.44e-69	264
Scaffold_10161	NC_019418	66.921	656	217	0	9	664	28162	28817	5.29e-51	205
Scaffold_10161	NC_006557	66.99	515	137	18	2420	2910	3617	3112	8.96e-23	111
Scaffold_10161	NC_018285	70.385	260	62	7	10	260	21445	21192	1.33e-20	104
Scaffold_10161	NC_013644	71.09	211	53	3	2891	3094	2831	2622	1.62e-19	100
Scaffold_10161	NC_021863	75.352	142	35	0	2786	2927	4033	3892	5.66e-19	98.7
Scaffold_10161	NC_008799	75.352	142	35	0	2786	2927	4016	3875	5.66e-19	98.7
Scaffold_10161	NC_008798	75.352	142	35	0	2786	2927	4017	3876	5.66e-19	98.7
Scaffold_10161	NC_007047	75.352	142	35	0	2786	2927	25848	25707	5.66e-19	98.7
Scaffold_10161	GQ478087	69.141	256	57	10	2444	2683	2474	2225	1.52e-13	80.6
Scaffold_10161	GQ478087	91.228	57	5	0	927	983	2982	2926	1.52e-13	80.6
Scaffold_10161	GQ478087	84.483	58	9	0	925	982	4661	4604	1.17e-08	64.4
Scaffold_10161	GQ478085	69.141	256	57	10	2444	2683	2474	2225	1.52e-13	80.6
Scaffold_10161	GQ478085	91.228	57	5	0	927	983	2982	2926	1.52e-13	80.6
Scaffold_10161	GQ478085	84.483	58	9	0	925	982	4661	4604	1.17e-08	64.4
Scaffold_10161	GQ478082	69.141	256	57	10	2444	2683	2474	2225	1.52e-13	80.6
Scaffold_10161	GQ478082	91.228	57	5	0	927	983	2983	2927	1.52e-13	80.6
Scaffold_10161	GQ478082	84.483	58	9	0	925	982	4665	4608	1.17e-08	64.4
Scaffold_10161	NC_024384	85.185	54	7	1	2878	2930	34950	34897	4.96e-07	59
Scaffold_10161	NC_003291	81.667	60	11	0	2863	2922	21847	21788	4.96e-07	59
Scaffold_10161	NC_003216	85.185	54	7	1	2878	2930	27365	27312	4.96e-07	59
Scaffold_10161	NC_021868	87.5	40	5	0	691	730	30981	30942	0.000257	50
Scaffold_10161	NC_007924	82.222	45	8	0	2876	2920	2654	2610	0.003	46.4
Scaffold_10161	KF767351	82.222	45	8	0	2876	2920	2797	2753	0.003	46.4
Scaffold_10161	NC_024121	77.778	54	9	1	1034	1084	68016	68069	0.038	42.8
Scaffold_10161	NC_021803	88.571	35	3	1	2997	3031	48864	48831	0.038	42.8
Scaffold_10161	NC_019515	92.857	28	2	0	3001	3028	70626	70599	0.038	42.8
Scaffold_10161	KC595514	84.211	38	6	0	2402	2439	15921	15884	0.038	42.8
Scaffold_10161	AP013507	84.783	46	3	3	837	881	35245	35203	0.038	42.8
Scaffold_10163	KF669657	87.879	33	4	0	556	588	30690	30722	0.007	42.8
Scaffold_1017	KC330681	87.879	33	4	0	561	593	31794	31762	0.012	42.8
Scaffold_1017	HQ317290	87.5	32	4	0	343	374	12298	12329	0.04	41
Scaffold_1017	AP013551	100	22	0	0	437	458	10373	10352	0.04	41
Scaffold_1017	AP013443	100	22	0	0	437	458	39445	39424	0.04	41
Scaffold_10170	KJ502657	78.846	52	6	2	138	189	26114	26068	0.041	41
Scaffold_10173	NC_016659	92.308	26	2	0	27	52	30286	30261	0.042	39.2
Scaffold_10177	NC_014792	100	23	0	0	313	335	148666	148644	0.004	42.8
Scaffold_1018	KC330681	87.879	33	4	0	561	593	31794	31762	0.017	42.8
Scaffold_10182	GQ478085	85.776	232	21	5	818	1045	15036	15259	9.08e-68	259
Scaffold_10182	GQ478087	92.105	38	3	0	818	855	15890	15927	2e-06	55.4
Scaffold_10182	GQ478087	72.449	98	23	2	949	1045	15987	16081	8.52e-05	50
Scaffold_10182	NC_019517	80.328	61	10	2	979	1039	61435	61377	8.52e-05	50
Scaffold_10182	AP013542	79.032	62	9	2	341	398	13526	13465	0.000297	48.2
Scaffold_10182	NC_019529	75.806	62	14	1	976	1037	38059	38119	0.044	41
Scaffold_10182	KJ567043	86.486	37	4	1	980	1016	78504	78539	0.044	41
Scaffold_10182	6.66667e+06	76.667	60	10	2	343	398	25421	25362	0.044	41
Scaffold_10187	JN797798	88.571	35	2	2	209	242	55549	55582	0.035	39.2
Scaffold_10188	KF301602	92.308	26	2	0	66	91	44579	44604	0.033	39.2
Scaffold_10189	AP013385	90	30	3	0	276	305	20592	20621	0.016	41
Scaffold_1019	NC_012530	93.75	32	2	0	3895	3926	103726	103695	0.000398	50
Scaffold_1019	NC_015262	90.625	32	3	0	3676	3707	24487	24518	0.017	44.6
Scaffold_10190	KF021268	92.857	28	2	0	84	111	123228	123255	0.007	42.8
Scaffold_10190	NC_007581	88.889	36	2	2	69	103	173623	173657	0.026	41
Scaffold_10191	NC_021336	87.5	32	4	0	409	440	4611	4642	0.032	41
Scaffold_10194	NC_015251	86.111	36	3	1	187	220	144737	144772	0.026	41
Scaffold_10194	NC_007581	92.593	27	2	0	227	253	114264	114290	0.026	41
Scaffold_10196	NC_019521	81.395	43	6	1	75	117	178065	178025	0.027	39.2
Scaffold_10197	AP013400	84.783	46	6	1	3391	3435	11050	11095	0.001	48.2
Scaffold_10198	KF021268	80.488	41	8	0	9	49	43209	43169	0.031	39.2
Scaffold_10199	NC_023688	83.333	36	6	0	93	128	183972	184007	0.034	39.2
Scaffold_102	NC_019526	85.714	42	6	0	774	815	300404	300363	6.97e-05	50
Scaffold_10208	NC_024205	80.851	47	7	1	1433	1477	152963	153009	0.046	42.8
Scaffold_10208	NC_018856	80.851	47	7	1	1433	1477	127709	127755	0.046	42.8
Scaffold_10209	NC_019511	96	25	1	0	864	888	20318	20342	0.038	41
Scaffold_1021	NC_019448	92.857	28	2	0	72	99	128820	128847	0.008	42.8
Scaffold_10210	NC_019500	87.879	33	2	1	195	225	140488	140456	0.034	39.2
Scaffold_10210	NC_014260	87.879	33	2	1	195	225	98079	98111	0.034	39.2
Scaffold_10210	NC_010105	87.879	33	2	1	195	225	99333	99365	0.034	39.2
Scaffold_10211	JX128258	71.264	87	25	0	81	167	51475	51561	0.009	44.6
Scaffold_10211	NC_020855	90.323	31	3	0	1085	1115	115662	115632	0.033	42.8
Scaffold_10212	NC_021799	88.889	36	4	0	1330	1365	52812	52847	0.00078	48.2
Scaffold_10212	NC_021789	88.889	36	4	0	1330	1365	39785	39820	0.00078	48.2
Scaffold_10216	AP013554	82.222	45	8	0	48	92	27085	27041	0.000248	46.4
Scaffold_10218	6.66667e+06	100	23	0	0	1372	1394	62915	62937	0.021	42.8
Scaffold_10220	NC_024356	79.63	54	9	2	277	330	24963	24912	0.043	41
Scaffold_10220	NC_023719	100	22	0	0	50	71	80595	80616	0.043	41
Scaffold_10220	NC_023719	73.134	67	18	0	243	309	473957	473891	0.043	41
Scaffold_10220	NC_010576	91.176	34	1	2	302	333	42925	42958	0.043	41
Scaffold_10220	NC_000872	76.786	56	11	1	278	331	22910	22965	0.043	41
Scaffold_10221	KC595512	77.049	61	14	0	502	562	47796	47736	0.000322	48.2
Scaffold_10221	NC_016562	86.842	38	5	0	44	81	115481	115444	0.001	46.4
Scaffold_10221	KF148616	86.842	38	5	0	44	81	115717	115680	0.001	46.4
Scaffold_10221	FR823450	86.842	38	5	0	44	81	13203	13240	0.001	46.4
Scaffold_10221	AP013540	93.333	30	2	0	529	558	40760	40731	0.001	46.4
Scaffold_10221	AP013521	73.333	75	17	1	487	561	12110	12181	0.004	44.6
Scaffold_10221	NC_023743	90.909	33	0	2	61	90	25875	25843	0.048	41
Scaffold_10221	NC_019404	90.909	33	0	2	61	90	19254	19286	0.048	41
Scaffold_10221	NC_012663	83.784	37	6	0	529	565	5264	5228	0.048	41
Scaffold_10221	DQ004855	71.739	92	21	3	470	557	13530	13440	0.048	41
Scaffold_1023	AY583235	68.468	222	62	4	3511	3728	245	28	1.42e-11	75.2
Scaffold_10230	AP013455	81.25	48	6	1	632	679	2933	2977	0.031	44.6
Scaffold_10233	NC_018088	82.051	39	7	0	139	177	99299	99261	0.038	39.2
Scaffold_10234	NC_015250	82.222	45	7	1	507	550	84048	84004	0.012	42.8
Scaffold_10237	NC_019401	75.325	77	19	0	54	130	150380	150456	1.91e-06	53.6
Scaffold_10237	NC_019526	69.811	106	26	2	201	303	48489	48591	0.001	44.6
Scaffold_10237	NC_021072	90	30	3	0	85	114	105745	105716	0.012	41
Scaffold_10237	NC_006820	85.714	35	3	1	87	119	92957	92991	0.042	39.2
Scaffold_10238	NC_019401	75.325	77	19	0	175	251	150380	150456	2.88e-06	53.6
Scaffold_1024	AY583235	69.136	243	73	2	3929	4170	245	4	5.91e-17	93.3
Scaffold_1024	NC_023719	81.633	49	6	1	2865	2913	186804	186759	0.008	46.4
Scaffold_10240	6.66667e+06	93.103	29	1	1	90	117	144831	144803	0.016	41
Scaffold_10246	NC_007581	84.211	38	6	0	3868	3905	145357	145394	0.049	42.8
Scaffold_10249	NC_019526	100	21	0	0	174	194	264774	264794	0.031	39.2
Scaffold_1025	NC_007055	84.591	318	49	0	39613	39930	35083	35400	3.12e-94	352
Scaffold_1025	NC_019914	78.505	321	69	0	39611	39931	10800	11120	1.02e-68	268
Scaffold_1025	NC_019914	88.136	59	7	0	40071	40129	11209	11267	1.25e-10	75.2
Scaffold_1025	NC_022914	77.301	326	72	2	39613	39937	33164	33488	9.55e-63	248
Scaffold_1025	NC_007063	75.942	345	79	3	39613	39954	33131	33474	4.95e-60	239
Scaffold_1025	NC_007050	75.942	345	79	3	39613	39954	36182	36525	4.95e-60	239
Scaffold_1025	NC_007049	75.942	345	79	3	39613	39954	34673	35016	4.95e-60	239
Scaffold_1025	NC_021332	75.652	345	80	3	39613	39954	6275	6618	2.1e-58	233
Scaffold_1025	NC_007052	75.51	343	81	3	39613	39954	34886	35226	2.56e-57	230
Scaffold_1025	NC_021863	75.472	318	78	0	39613	39930	7777	8094	3.8e-55	223
Scaffold_1025	NC_017968	74.534	322	80	2	39611	39931	43386	43066	1.02e-49	205
Scaffold_1025	NC_017968	80.682	88	17	0	40046	40133	42996	42909	8.39e-13	82.4
Scaffold_1025	NC_007065	73.585	318	84	0	39613	39930	35114	35431	5.29e-47	196
Scaffold_1025	NC_007064	73.585	318	84	0	39613	39930	32880	33197	5.29e-47	196
Scaffold_1025	NC_015252	72.897	321	87	0	39611	39931	32036	32356	2.74e-44	187
Scaffold_1025	NC_008617	66.286	525	128	9	39611	40133	11933	12410	5.65e-34	152
Scaffold_1025	KF831354	66.286	525	128	9	39611	40133	31280	30803	5.65e-34	152
Scaffold_1025	NC_021773	70.807	322	92	2	39611	39931	20767	21087	1.97e-33	150
Scaffold_1025	NC_021773	80.682	88	17	0	40046	40133	21157	21244	8.39e-13	82.4
Scaffold_1025	NC_009815	70.938	320	91	2	39613	39931	34917	35235	1.97e-33	150
Scaffold_1025	NC_003216	70.938	320	91	2	39613	39931	37622	37940	1.97e-33	150
Scaffold_1025	JX274647	70.807	322	92	2	39611	39931	10630	10950	1.97e-33	150
Scaffold_1025	JX274647	82.353	68	12	0	40066	40133	11040	11107	5.3e-09	69.8
Scaffold_1025	JX274646	70.807	322	92	2	39611	39931	10405	10725	1.97e-33	150
Scaffold_1025	JX274646	82.353	68	12	0	40066	40133	10815	10882	5.3e-09	69.8
Scaffold_1025	NC_024384	70.312	320	93	2	39613	39931	5019	5337	1.02e-30	141
Scaffold_1025	NC_009810	72.131	244	66	2	39689	39931	35540	35782	2.25e-26	127
Scaffold_1025	NC_021861	67.123	365	108	4	39612	39970	4970	5328	1.73e-21	111
Scaffold_1025	NC_019418	68.512	289	89	2	39614	39901	29720	29433	2.57e-19	104
Scaffold_1025	NC_003157	70.698	215	61	2	39688	39901	8467	8680	3.81e-17	96.9
Scaffold_1025	JX564242	68.385	291	88	4	39612	39900	3104	3392	3.81e-17	96.9
Scaffold_1025	NC_022791	68.151	292	89	4	39612	39901	24447	24158	4.64e-16	93.3
Scaffold_1025	KC413988	72.131	183	49	2	39611	39792	30320	30139	4.64e-16	93.3
Scaffold_1025	DQ113772	68.151	292	89	4	39612	39901	6907	7196	4.64e-16	93.3
Scaffold_1025	DQ386162	69.118	204	63	0	39698	39901	27879	28082	2.4e-13	84.2
Scaffold_1025	KC348598	69.149	188	58	0	39688	39875	23497	23310	1.02e-11	78.8
Scaffold_1025	NC_021558	66.327	294	88	4	39636	39925	23289	23575	3.57e-11	77
Scaffold_1025	NC_020197	66.436	289	93	3	39614	39900	8261	8547	1.25e-10	75.2
Scaffold_1025	NC_012756	65.287	314	109	0	39612	39925	8325	8638	1.25e-10	75.2
Scaffold_1025	NC_012753	67.805	205	66	0	39696	39900	3625	3829	4.35e-10	73.4
Scaffold_1025	NC_009018	68.778	221	65	4	39698	39916	7063	7281	4.35e-10	73.4
Scaffold_1025	NC_008799	83.824	68	11	0	40061	40128	8624	8691	4.35e-10	73.4
Scaffold_1025	NC_002661	83.824	68	11	0	40061	40128	9105	9172	4.35e-10	73.4
Scaffold_1025	AP011956	83.824	68	11	0	40061	40128	10160	10227	4.35e-10	73.4
Scaffold_1025	NC_021336	80.822	73	14	0	39688	39760	9423	9351	5.3e-09	69.8
Scaffold_1025	NC_020883	66.154	325	98	7	39612	39930	11720	12038	5.3e-09	69.8
Scaffold_1025	NC_014460	82.609	69	9	1	40060	40128	32464	32529	5.3e-09	69.8
Scaffold_1025	NC_012784	82.609	69	9	1	40060	40128	10202	10267	5.3e-09	69.8
Scaffold_1025	NC_007057	82.609	69	9	1	40060	40128	33886	33951	5.3e-09	69.8
Scaffold_1025	NC_004615	82.609	69	9	1	40060	40128	8863	8928	5.3e-09	69.8
Scaffold_1025	DQ908929	82.609	69	9	1	40060	40128	7169	7234	5.3e-09	69.8
Scaffold_1025	NC_008689	92.857	42	3	0	86	127	40230	40271	7.86e-07	62.6
Scaffold_1025	NC_013645	66.505	206	69	0	39696	39901	29231	29436	2.74e-06	60.8
Scaffold_1025	NC_002185	64.964	274	92	2	39629	39900	5394	5665	3.34e-05	57.2
Scaffold_1025	NC_008721	65.421	214	74	0	39688	39901	19538	19751	0.000407	53.6
Scaffold_10251	NC_019513	87.805	41	4	1	911	950	17497	17457	0.000656	48.2
Scaffold_10251	NC_011612	87.805	41	4	1	911	950	3543	3583	0.000656	48.2
Scaffold_10251	1.13303e+06	82.353	51	7	2	1685	1734	11450	11401	0.008	44.6
Scaffold_10251	NC_019448	92.857	28	2	0	1643	1670	39827	39800	0.028	42.8
Scaffold_10255	NC_021536	90	30	3	0	375	404	70596	70625	0.02	41
Scaffold_10258	NC_014661	87.5	32	4	0	211	242	16465	16496	0.013	41
Scaffold_10259	NC_024387	81.395	43	8	0	94	136	24821	24779	0.005	42.8
Scaffold_10259	NC_009812	81.395	43	8	0	94	136	25322	25280	0.005	42.8
Scaffold_10259	NC_021539	87.5	32	4	0	94	125	20865	20834	0.018	41
Scaffold_10259	NC_003291	87.5	32	4	0	94	125	20588	20557	0.018	41
Scaffold_1026	NC_001884	71.654	254	61	5	24919	25168	101008	101254	4.3e-25	122
Scaffold_1026	KF021268	66.436	289	90	3	11398	11682	113930	114215	1.61e-11	77
Scaffold_1026	NC_023582	67.876	193	56	2	12662	12851	83245	83434	2.9e-08	66.2
Scaffold_1026	NC_023582	72.289	83	19	1	12922	13000	83691	83773	0.027	46.4
Scaffold_1026	NC_001341	80.952	63	11	1	13940	14002	3004	3065	1.5e-05	57.2
Scaffold_1026	AP013430	84.615	52	4	3	1950	2000	7293	7341	0.008	48.2
Scaffold_1026	NC_022918	93.333	30	2	0	10605	10634	87338	87367	0.027	46.4
Scaffold_1026	NC_022763	81.25	48	9	0	14704	14751	47784	47831	0.027	46.4
Scaffold_1026	NC_019726	93.333	30	2	0	10605	10634	4890	4861	0.027	46.4
Scaffold_1026	NC_019448	93.333	30	2	0	10605	10634	83452	83481	0.027	46.4
Scaffold_1026	EU418428	93.333	30	2	0	10605	10634	82942	82971	0.027	46.4
Scaffold_1026	AY176327	93.333	30	2	0	10605	10634	75885	75914	0.027	46.4
Scaffold_1026	AP013485	83.333	54	6	3	2094	2146	15248	15299	0.027	46.4
Scaffold_1026	6.66667e+06	74.648	71	15	1	14527	14594	85075	85005	0.027	46.4
Scaffold_1026	6.66667e+06	81.25	48	9	0	14704	14751	143492	143445	0.027	46.4
Scaffold_10264	NC_022767	90	30	3	0	192	221	45488	45459	0.008	41
Scaffold_10264	NC_018861	76.667	60	12	2	162	220	129656	129714	0.029	39.2
Scaffold_10265	AP013551	96.774	31	1	0	856	886	16235	16265	2.57e-05	51.8
Scaffold_10265	NC_024144	90.323	31	3	0	50	80	53	23	0.013	42.8
Scaffold_10265	NC_019421	90.323	31	3	0	50	80	123	93	0.013	42.8
Scaffold_10265	NC_011398	90.323	31	3	0	50	80	115	85	0.013	42.8
Scaffold_10265	NC_023719	78.125	64	7	4	365	427	430872	430815	0.046	41
Scaffold_10265	NC_009812	82.609	46	5	2	46	91	8295	8253	0.046	41
Scaffold_10267	NC_020854	69.466	131	40	0	201	331	8453	8323	1.75e-06	57.2
Scaffold_10267	NC_015465	71.429	119	32	2	216	333	22493	22376	6.11e-06	55.4
Scaffold_10267	NC_016164	70.4	125	35	2	214	337	21025	20902	7.44e-05	51.8
Scaffold_10269	AP013515	79.245	53	6	2	107	159	35020	35067	0.006	42.8
Scaffold_1027	NC_023719	65.217	598	186	5	12320	12899	253963	254556	3.54e-30	138
Scaffold_1027	NC_023719	93.75	32	2	0	13737	13768	15090	15121	0.001	50
Scaffold_1027	NC_019507	93.548	31	2	0	3811	3841	80444	80414	0.005	48.2
Scaffold_1027	HM246722	93.548	31	2	0	3811	3841	4609	4639	0.005	48.2
Scaffold_1027	FN667788	93.548	31	2	0	3811	3841	166373	166343	0.005	48.2
Scaffold_1027	AP013521	81.356	59	7	3	11868	11923	2892	2835	0.005	48.2
Scaffold_10271	NC_019401	88.889	36	2	2	329	363	239932	239966	0.018	41
Scaffold_10271	NC_015279	75.862	58	11	1	290	344	132870	132927	0.018	41
Scaffold_10272	NC_024209	74.757	103	21	3	561	659	46388	46287	6.82e-08	60.8
Scaffold_10272	6.66667e+06	71.569	102	23	3	560	658	46543	46445	0.002	46.4
Scaffold_10272	NC_017972	71.91	89	22	2	570	658	40254	40339	0.018	42.8
Scaffold_1028	NC_023719	73.418	237	61	1	27295	27529	253963	254199	6.64e-31	141
Scaffold_1028	NC_023719	67.797	177	57	0	27698	27874	254380	254556	5.11e-07	62.6
Scaffold_1028	NC_023551	84.746	59	7	2	9564	9622	16263	16207	6.22e-06	59
Scaffold_1028	JX193904	83.051	59	6	2	9564	9622	22466	22520	2.17e-05	57.2
Scaffold_1028	NC_023595	89.362	47	3	2	9576	9622	25388	25432	7.58e-05	55.4
Scaffold_1028	NC_019421	88.889	36	4	0	31806	31841	11226	11191	0.011	48.2
Scaffold_1028	NC_019526	80	70	9	5	37197	37266	275307	275371	0.039	46.4
Scaffold_10281	AP013455	82	50	4	3	157	203	15523	15570	0.01	41
Scaffold_10281	NC_022767	92.857	28	1	1	147	174	65477	65451	0.035	39.2
Scaffold_10283	AB609718	90.164	61	6	0	1645	1705	138550	138490	1.48e-14	84.2
Scaffold_10283	NC_023006	91.228	57	5	0	1645	1701	21133	21077	1.8e-13	80.6
Scaffold_10283	NC_014660	88.136	59	7	0	1643	1701	80483	80425	7.64e-12	75.2
Scaffold_10283	NC_013085	89.286	56	6	0	1646	1701	32078	32023	7.64e-12	75.2
Scaffold_10283	NC_013085	75	64	16	0	1646	1709	176448	176385	0.013	44.6
Scaffold_10283	NC_006820	83.099	71	12	0	1644	1714	118249	118319	7.64e-12	75.2
Scaffold_10283	NC_008296	87.931	58	7	0	1644	1701	162267	162324	2.67e-11	73.4
Scaffold_10283	NC_019516	84.375	64	10	0	1644	1707	17053	17116	9.31e-11	71.6
Scaffold_10283	NC_015279	84.375	64	10	0	1644	1707	140959	141022	9.31e-11	71.6
Scaffold_10283	HQ317290	85.938	64	8	1	1644	1707	161244	161306	9.31e-11	71.6
Scaffold_10283	NC_019445	87.5	56	7	0	1646	1701	14489	14434	3.25e-10	69.8
Scaffold_10283	NC_007804	87.5	56	7	0	1646	1701	2922	2867	3.25e-10	69.8
Scaffold_10283	JQ691610	87.5	56	7	0	1646	1701	2883	2828	3.25e-10	69.8
Scaffold_10283	NC_023719	85.965	57	8	0	1645	1701	403947	404003	1.13e-09	68
Scaffold_10283	NC_021072	84.375	64	9	1	1644	1707	71478	71416	1.13e-09	68
Scaffold_10283	NC_015281	84.375	64	9	1	1644	1707	164014	164076	1.13e-09	68
Scaffold_10283	NC_023587	78.947	76	16	0	1637	1712	152500	152575	3.96e-09	66.2
Scaffold_10283	NC_015289	86.154	65	6	3	1644	1707	161704	161766	3.96e-09	66.2
Scaffold_10283	NC_015289	75	64	16	0	1646	1709	19476	19539	0.013	44.6
Scaffold_10283	NC_015287	85.714	56	8	0	1646	1701	216582	216637	3.96e-09	66.2
Scaffold_10283	NC_015285	84.483	58	9	0	1644	1701	158987	159044	1.38e-08	64.4
Scaffold_10283	NC_014636	86.792	53	7	0	1645	1697	199474	199422	1.38e-08	64.4
Scaffold_10283	HQ317385	84.483	58	9	0	1644	1701	153730	153787	1.38e-08	64.4
Scaffold_10283	HQ317385	77.193	57	13	0	1645	1701	19102	19158	0.013	44.6
Scaffold_10283	NC_021536	82.812	64	10	1	1644	1707	147058	147120	4.82e-08	62.6
Scaffold_10283	NC_015288	80.282	71	13	1	1644	1714	163209	163278	4.82e-08	62.6
Scaffold_10283	NC_015283	80.282	71	13	1	1644	1714	165842	165911	4.82e-08	62.6
Scaffold_10283	NC_015282	82.812	64	10	1	1644	1707	160621	160683	4.82e-08	62.6
Scaffold_10283	NC_023584	82.759	58	10	0	1644	1701	154519	154576	1.68e-07	60.8
Scaffold_10283	NC_021530	82.759	58	10	0	1644	1701	155054	155111	1.68e-07	60.8
Scaffold_10283	NC_021071	81.25	64	11	1	1644	1707	71684	71622	5.88e-07	59
Scaffold_10283	NC_019443	81.25	64	11	1	1644	1707	159602	159664	5.88e-07	59
Scaffold_10283	HM246724	82.456	57	10	0	1645	1701	13520	13464	5.88e-07	59
Scaffold_10283	FN667789	82.456	57	10	0	1645	1701	112373	112429	5.88e-07	59
Scaffold_10283	FN667788	82.456	57	10	0	1645	1701	111952	112008	5.88e-07	59
Scaffold_10283	NC_019543	82.143	56	10	0	1646	1701	61004	60949	2.05e-06	57.2
Scaffold_10283	NC_004735	80.328	61	12	0	1645	1705	37712	37772	2.05e-06	57.2
Scaffold_10283	JX306041	82.143	56	10	0	1646	1701	64319	64264	2.05e-06	57.2
Scaffold_10283	NC_023561	81.667	60	10	1	1646	1704	72431	72372	7.16e-06	55.4
Scaffold_10283	NC_023561	81.667	60	10	1	1646	1704	77327	77268	7.16e-06	55.4
Scaffold_10283	NC_023561	77.193	57	13	0	1645	1701	75753	75697	0.013	44.6
Scaffold_10283	NC_020851	79.365	63	13	0	1644	1706	54072	54010	7.16e-06	55.4
Scaffold_10283	NC_014662	81.667	60	10	1	1646	1704	69895	69836	7.16e-06	55.4
Scaffold_10283	NC_022052	81.356	59	10	1	1646	1704	64724	64781	2.5e-05	53.6
Scaffold_10283	NC_019406	80.952	63	9	2	1645	1705	69266	69327	2.5e-05	53.6
Scaffold_10283	NC_019406	78.689	61	11	1	1645	1705	62485	62543	0.000304	50
Scaffold_10283	NC_018853	79.661	59	12	0	1646	1704	39563	39621	2.5e-05	53.6
Scaffold_10283	NC_015938	81.356	59	10	1	1646	1704	2463	2520	2.5e-05	53.6
Scaffold_10283	NC_008206	80.328	61	11	1	1645	1705	62145	62204	2.5e-05	53.6
Scaffold_10283	JX163858	80.952	63	9	2	1645	1705	155298	155237	2.5e-05	53.6
Scaffold_10283	JX163858	77.966	59	11	1	1646	1704	155933	155877	0.004	46.4
Scaffold_10283	NC_021782	80.357	56	11	0	1646	1701	63034	63089	8.72e-05	51.8
Scaffold_10283	NC_021772	80.357	56	11	0	1646	1701	68165	68220	8.72e-05	51.8
Scaffold_10283	NC_019529	80.357	56	11	0	1646	1701	45243	45298	8.72e-05	51.8
Scaffold_10283	NC_018861	78.689	61	13	0	1645	1705	88774	88714	8.72e-05	51.8
Scaffold_10283	NC_016562	78.689	61	13	0	1645	1705	38431	38371	8.72e-05	51.8
Scaffold_10283	KF148616	78.689	61	13	0	1645	1705	38665	38605	8.72e-05	51.8
Scaffold_10283	KF030445	80.357	56	11	0	1646	1701	30302	30247	8.72e-05	51.8
Scaffold_10283	HQ630627	81.667	60	9	2	1646	1704	294930	294872	8.72e-05	51.8
Scaffold_10283	FR823450	78.689	61	13	0	1645	1705	90044	90104	8.72e-05	51.8
Scaffold_10283	FM180578	80.357	56	11	0	1646	1701	22540	22595	8.72e-05	51.8
Scaffold_10283	NC_015286	78.125	64	13	1	1644	1707	163918	163980	0.000304	50
Scaffold_10283	NC_021534	78.571	56	12	0	1646	1701	46523	46578	0.001	48.2
Scaffold_10283	NC_020879	78.571	56	12	0	1646	1701	62296	62241	0.001	48.2
Scaffold_10283	NC_020875	79.31	58	11	1	1644	1701	150856	150912	0.001	48.2
Scaffold_10283	NC_019526	78.571	56	12	0	1646	1701	178310	178365	0.001	48.2
Scaffold_10283	NC_018846	78.571	56	12	0	1646	1701	23774	23829	0.001	48.2
Scaffold_10283	NC_016571	80.357	56	10	1	1646	1701	16189	16135	0.001	48.2
Scaffold_10283	NC_015251	78.571	56	12	0	1646	1701	112210	112265	0.001	48.2
Scaffold_10283	NC_015251	78.571	56	11	1	1646	1701	113575	113629	0.013	44.6
Scaffold_10283	NC_011273	78.689	61	12	1	1645	1705	93738	93797	0.001	48.2
Scaffold_10283	NC_009603	78.689	61	12	1	1645	1705	111	52	0.001	48.2
Scaffold_10283	NC_008464	78.571	56	12	0	1646	1701	60079	60134	0.001	48.2
Scaffold_10283	NC_005135	78.571	56	12	0	1646	1701	65448	65393	0.001	48.2
Scaffold_10283	NC_003356	78.571	56	12	0	1646	1701	17342	17397	0.001	48.2
Scaffold_10283	NC_000924	78.571	56	12	0	1646	1701	21302	21357	0.001	48.2
Scaffold_10283	KC954775	78.571	56	12	0	1645	1700	123244	123299	0.001	48.2
Scaffold_10283	HM208303	78.571	56	12	0	1646	1701	21861	21916	0.001	48.2
Scaffold_10283	NC_022968	76.923	65	14	1	1643	1707	66103	66040	0.004	46.4
Scaffold_10283	NC_022968	77.586	58	12	1	1646	1703	60762	60706	0.045	42.8
Scaffold_10283	NC_019411	77.966	59	11	1	1646	1704	51156	51212	0.004	46.4
Scaffold_10283	NC_019400	76.923	65	14	1	1643	1707	85036	85099	0.004	46.4
Scaffold_10283	NC_015290	75	72	17	1	1644	1715	117118	117188	0.004	46.4
Scaffold_10283	NC_011421	79.365	63	8	3	1645	1705	32603	32662	0.004	46.4
Scaffold_10283	NC_022058	77.049	61	12	1	1645	1705	4027	4085	0.013	44.6
Scaffold_10283	NC_020855	76.056	71	15	2	1644	1713	38954	38885	0.013	44.6
Scaffold_10283	NC_019521	74.648	71	17	1	1635	1705	1270	1339	0.013	44.6
Scaffold_10283	NC_008203	77.049	61	12	1	1645	1705	4030	4088	0.013	44.6
Scaffold_10283	6.66667e+06	78.689	61	11	2	1645	1705	5402	5460	0.013	44.6
Scaffold_10283	NC_019540	76.786	56	13	0	1646	1701	44201	44256	0.045	42.8
Scaffold_10283	NC_019538	76.786	56	13	0	1646	1701	198620	198675	0.045	42.8
Scaffold_10283	NC_015250	77.586	58	12	1	1644	1701	67570	67514	0.045	42.8
Scaffold_10283	NC_007603	76.786	56	13	0	1646	1701	4900	4955	0.045	42.8
Scaffold_10283	KF301602	76.786	56	13	0	1646	1701	81965	82020	0.045	42.8
Scaffold_10283	HE983844	77.586	58	12	1	1645	1701	719	776	0.045	42.8
Scaffold_10283	6.66667e+06	78.947	57	10	2	1645	1701	94458	94512	0.045	42.8
Scaffold_10287	AP013407	86.486	37	4	1	326	362	10276	10241	0.015	41
Scaffold_10293	AP011956	69.689	386	111	4	194	576	33821	34203	6.78e-37	156
Scaffold_10293	NC_008689	67.292	373	102	10	195	557	33911	34273	5.57e-19	96.9
Scaffold_10293	NC_008617	67.292	373	102	10	195	557	32745	33107	5.57e-19	96.9
Scaffold_10293	NC_005356	67.292	373	102	10	195	557	15053	15415	5.57e-19	96.9
Scaffold_10293	NC_012784	67.385	371	105	10	195	557	35230	35592	6.78e-18	93.3
Scaffold_10293	NC_007051	65.55	418	133	5	198	608	16584	16997	6.78e-18	93.3
Scaffold_10293	NC_021773	67.204	372	104	11	195	557	558	920	2.88e-16	87.8
Scaffold_10293	NC_013195	67.204	372	104	11	195	557	33742	34104	2.88e-16	87.8
Scaffold_10293	KJ596420	67.204	372	104	11	195	557	32462	32824	2.88e-16	87.8
Scaffold_10293	KF831354	67.204	372	104	11	195	557	10565	10203	2.88e-16	87.8
Scaffold_10293	KJ920400	73.239	71	19	0	396	466	30552	30482	0.011	42.8
Scaffold_10293	HE614282	73.239	71	19	0	396	466	15105	15175	0.011	42.8
Scaffold_10293	NC_021316	93.103	29	1	1	145	172	15047	15075	0.038	41
Scaffold_10293	HQ186308	93.103	29	1	1	145	172	14139	14167	0.038	41
Scaffold_10294	NC_001270	88.571	35	4	0	1068	1102	2801	2835	0.003	46.4
Scaffold_10294	JX486088	86.486	37	5	0	1796	1832	18247	18283	0.009	44.6
Scaffold_10294	AP013485	78.947	57	9	2	1877	1933	13129	13076	0.031	42.8
Scaffold_10296	NZ_ACSJ01000017	82.5	40	7	0	130	169	39033	39072	0.02	41
Scaffold_10296	NC_007581	82.5	40	7	0	130	169	168562	168601	0.02	41
Scaffold_1031	FN667789	88.889	36	3	1	308	342	126389	126354	0.003	44.6
Scaffold_1031	NC_019507	88.571	35	3	1	309	342	154283	154317	0.01	42.8
Scaffold_10310	NC_021865	69.675	277	71	4	1576	1847	14506	14238	5.08e-24	114
Scaffold_10310	DQ222855	68.462	260	69	4	1582	1836	17950	17699	1.66e-17	93.3
Scaffold_10310	KC348600	68.599	207	63	2	1597	1802	5691	5896	1.56e-11	73.4
Scaffold_10310	NC_018857	73.504	117	31	0	1599	1715	4208	4092	5.43e-11	71.6
Scaffold_10310	NC_024211	77.381	84	19	0	1599	1682	27238	27321	2.31e-09	66.2
Scaffold_10310	KF296717	70.992	131	38	0	1600	1730	38186	38056	2.31e-09	66.2
Scaffold_10310	NC_011645	73.684	114	28	2	1600	1712	19780	19668	8.06e-09	64.4
Scaffold_10310	KJ920400	71.774	124	32	1	1599	1722	25736	25856	8.06e-09	64.4
Scaffold_10310	NC_019502	65.748	254	74	4	1600	1848	37849	37604	9.82e-08	60.8
Scaffold_10310	NC_023599	65.882	255	73	5	1600	1848	20359	20113	3.43e-07	59
Scaffold_10310	NC_016563	70.085	117	32	1	1599	1715	649	762	5.09e-05	51.8
Scaffold_10310	NC_021539	67.391	138	45	0	1584	1721	16736	16599	0.002	46.4
Scaffold_10312	NC_019517	92.857	28	2	0	866	893	132214	132187	0.015	42.8
Scaffold_10312	NC_011041	92.857	28	2	0	866	893	133275	133248	0.015	42.8
Scaffold_10314	AP013393	90.323	31	3	0	41	71	22332	22362	0.003	42.8
Scaffold_10314	NC_021803	87.097	31	4	0	90	120	46416	46386	0.041	39.2
Scaffold_10314	NC_021789	87.097	31	4	0	90	120	50791	50761	0.041	39.2
Scaffold_10314	AP013479	81.395	43	7	1	41	83	2553	2512	0.041	39.2
Scaffold_10315	NC_017978	80.392	51	5	3	112	162	3244	3289	0.032	39.2
Scaffold_10319	NC_023728	96.296	27	1	0	183	209	33764	33738	0.007	44.6
Scaffold_10319	JX121091	96.296	27	1	0	183	209	33766	33740	0.007	44.6
Scaffold_1032	NC_019502	92.857	28	2	0	442	469	7219	7192	0.006	42.8
Scaffold_1032	AP013387	75.714	70	15	2	416	483	6210	6141	0.006	42.8
Scaffold_1032	NC_014792	92.593	27	2	0	454	480	151872	151898	0.021	41
Scaffold_1032	AP013541	81.633	49	7	2	444	491	8375	8328	0.021	41
Scaffold_10320	NC_020862	79.545	44	9	0	49	92	56044	56001	0.027	39.2
Scaffold_10320	NC_019543	78.261	46	10	0	39	84	69058	69013	0.027	39.2
Scaffold_10320	JX306041	78.261	46	10	0	39	84	73057	73012	0.027	39.2
Scaffold_10321	NC_019448	88.889	36	2	2	155	189	12087	12053	0.038	41
Scaffold_10326	KC954775	86.486	37	5	0	241	277	102568	102532	0.001	44.6
Scaffold_10326	NC_016562	82.222	45	4	2	213	257	73292	73252	0.017	41
Scaffold_10326	KF148616	82.222	45	4	2	213	257	73525	73485	0.017	41
Scaffold_10326	FR823450	82.222	45	4	2	213	257	54809	54849	0.017	41
Scaffold_10327	NC_020873	80	50	7	1	720	766	150121	150072	0.003	44.6
Scaffold_10327	AP013370	78.571	56	3	3	679	731	29278	29229	0.01	42.8
Scaffold_10327	NC_014663	93.103	29	1	1	398	425	153123	153095	0.036	41
Scaffold_10330	HQ641341	90	30	3	0	90	119	917	888	0.01	41
Scaffold_10330	NC_020867	92.308	26	2	0	28	53	31701	31676	0.035	39.2
Scaffold_10331	NC_015290	100	21	0	0	24	44	141878	141898	0.028	39.2
Scaffold_10333	NC_015289	84.211	38	5	1	92	129	28344	28308	0.03	39.2
Scaffold_10334	AP013403	89.655	29	3	0	71	99	21220	21248	0.033	39.2
Scaffold_10335	NC_004629	88.235	34	4	0	16	49	263488	263455	0.001	44.6
Scaffold_10338	NC_023719	96	25	1	0	4	28	202401	202377	0.015	41
Scaffold_10339	AP013507	84.091	44	6	1	969	1012	36085	36127	0.004	44.6
Scaffold_10339	NC_023719	92.593	27	2	0	613	639	455548	455522	0.043	41
Scaffold_10339	NC_023719	92.593	27	2	0	613	639	464623	464597	0.043	41
Scaffold_10343	NC_015290	93.103	29	1	1	69	97	37115	37142	0.008	41
Scaffold_10345	JX409895	88.889	36	2	2	21	54	12327	12362	0.018	41
Scaffold_10345	AP013393	84.615	39	4	1	16	52	7110	7148	0.018	41
Scaffold_10348	AP013426	80.488	41	8	0	178	218	33707	33667	0.038	39.2
Scaffold_10349	NC_010105	95.833	24	1	0	34	57	91188	91211	0.044	39.2
Scaffold_10352	NC_016571	87.5	32	4	0	17	48	222251	222282	0.009	41
Scaffold_10353	NC_016571	87.5	32	4	0	17	48	222251	222282	0.009	41
Scaffold_10354	AP013459	100	22	0	0	241	262	3585	3564	0.029	41
Scaffold_10357	NC_022771	96	25	1	0	301	325	116641	116665	0.034	41
Scaffold_10357	NC_021867	87.5	32	4	0	209	240	32393	32424	0.034	41
Scaffold_10357	NC_021856	96	25	1	0	301	325	118959	118983	0.034	41
Scaffold_10362	NC_013085	87.879	33	4	0	5	37	26613	26581	0.005	42.8
Scaffold_10368	NC_022744	87.097	31	4	0	115	145	2331	2301	0.039	39.2
Scaffold_10368	NC_011040	87.097	31	4	0	115	145	2347	2317	0.039	39.2
Scaffold_10369	NC_023007	81.132	53	8	2	1819	1870	27911	27860	0.008	44.6
Scaffold_10376	NC_020880	93.333	30	2	0	4734	4763	105	76	0.005	46.4
Scaffold_10376	NC_015938	83.721	43	4	1	4039	4081	7540	7501	0.018	44.6
Scaffold_10379	NC_019508	77.049	61	4	2	74	124	8179	8119	0.000253	48.2
Scaffold_10379	NC_019506	77.049	61	4	2	74	124	7999	7939	0.000253	48.2
Scaffold_10379	JF767210	75.41	61	5	2	74	124	8442	8382	0.011	42.8
Scaffold_10379	FR775895	90.323	31	3	0	453	483	48099	48069	0.011	42.8
Scaffold_10379	AP013370	83.784	37	6	0	542	578	22031	21995	0.038	41
Scaffold_10380	JX128258	83.333	36	6	0	126	161	50772	50737	0.046	39.2
Scaffold_10380	6.66667e+06	87.879	33	3	1	136	167	34055	34087	0.046	39.2
Scaffold_10381	6.66667e+06	90.909	33	2	1	136	167	34055	34087	0.004	42.8
Scaffold_10384	NC_018088	87.097	31	4	0	287	317	75453	75423	0.046	39.2
Scaffold_10385	NC_001629	88.889	36	3	1	1758	1793	14404	14438	0.006	44.6
Scaffold_10388	NC_023574	75.221	113	28	0	6	118	75955	76067	4.5e-14	78.8
Scaffold_10388	NC_015253	77.465	71	16	0	3	73	87603	87673	1.47e-07	57.2
Scaffold_10388	NC_019515	71.053	76	22	0	4	79	20204	20129	0.039	39.2
Scaffold_10389	NC_023574	75.221	113	28	0	6	118	75955	76067	4.5e-14	78.8
Scaffold_10389	NC_015253	76.056	71	17	0	3	73	87603	87673	6.25e-06	51.8
Scaffold_10389	NC_019515	72.368	76	21	0	4	79	20204	20129	0.003	42.8
Scaffold_10389	KM051843	87.879	33	3	1	1	32	66754	66722	0.039	39.2
Scaffold_1039	NC_013645	68.473	203	56	5	57	255	22948	22750	4.74e-08	62.6
Scaffold_10391	NC_011614	82.927	41	7	0	92	132	37177	37217	0.004	42.8
Scaffold_10391	NC_024391	80.488	41	8	0	92	132	36703	36743	0.043	39.2
Scaffold_10391	NC_023500	80.488	41	8	0	92	132	36891	36931	0.043	39.2
Scaffold_10391	NC_021863	80.488	41	8	0	92	132	37640	37680	0.043	39.2
Scaffold_10391	NC_021332	80.488	41	8	0	92	132	37485	37525	0.043	39.2
Scaffold_10391	NC_021326	80.488	41	8	0	92	132	7790	7750	0.043	39.2
Scaffold_10391	NC_017968	82.051	39	7	0	94	132	14912	14874	0.043	39.2
Scaffold_10391	NC_014460	82.051	39	7	0	94	132	19647	19685	0.043	39.2
Scaffold_10391	NC_010147	80.488	41	8	0	92	132	38097	38137	0.043	39.2
Scaffold_10391	NC_008799	80.488	41	8	0	92	132	38202	38242	0.043	39.2
Scaffold_10391	NC_008798	82.051	39	7	0	94	132	38187	38225	0.043	39.2
Scaffold_10391	NC_008583	82.051	39	7	0	94	132	38605	38643	0.043	39.2
Scaffold_10391	NC_007065	80.488	41	8	0	92	132	20979	21019	0.043	39.2
Scaffold_10391	NC_007064	80.488	41	8	0	92	132	21148	21188	0.043	39.2
Scaffold_10391	NC_007063	80.488	41	8	0	92	132	21151	21191	0.043	39.2
Scaffold_10391	NC_007061	80.488	41	8	0	92	132	21265	21305	0.043	39.2
Scaffold_10391	NC_007060	80.488	41	8	0	92	132	21112	21152	0.043	39.2
Scaffold_10391	NC_007059	80.488	41	8	0	92	132	20981	21021	0.043	39.2
Scaffold_10391	NC_007058	80.488	41	8	0	92	132	22190	22230	0.043	39.2
Scaffold_10391	NC_007057	80.488	41	8	0	92	132	21465	21505	0.043	39.2
Scaffold_10391	NC_007050	82.051	39	7	0	94	132	22233	22271	0.043	39.2
Scaffold_10391	NC_007048	82.051	39	7	0	94	132	22067	22105	0.043	39.2
Scaffold_10391	NC_004615	82.051	39	7	0	94	132	38492	38530	0.043	39.2
Scaffold_10391	NC_003288	80.488	41	8	0	92	132	38001	38041	0.043	39.2
Scaffold_10391	JX274647	82.051	39	7	0	94	132	37922	37960	0.043	39.2
Scaffold_10391	JX274646	82.051	39	7	0	94	132	38886	38924	0.043	39.2
Scaffold_10391	DQ908929	80.488	41	8	0	92	132	36346	36386	0.043	39.2
Scaffold_10391	DQ530362	82.051	39	7	0	94	132	38660	38698	0.043	39.2
Scaffold_10391	DQ530360	82.051	39	7	0	94	132	38599	38637	0.043	39.2
Scaffold_10392	NC_011614	82.927	41	7	0	181	221	37177	37217	0.004	42.8
Scaffold_10392	NC_024391	80.488	41	8	0	181	221	36703	36743	0.045	39.2
Scaffold_10392	NC_023500	80.488	41	8	0	181	221	36891	36931	0.045	39.2
Scaffold_10392	NC_021863	80.488	41	8	0	181	221	37640	37680	0.045	39.2
Scaffold_10392	NC_021332	80.488	41	8	0	181	221	37485	37525	0.045	39.2
Scaffold_10392	NC_021326	80.488	41	8	0	181	221	7790	7750	0.045	39.2
Scaffold_10392	NC_017968	82.051	39	7	0	183	221	14912	14874	0.045	39.2
Scaffold_10392	NC_014460	82.051	39	7	0	183	221	19647	19685	0.045	39.2
Scaffold_10392	NC_010147	80.488	41	8	0	181	221	38097	38137	0.045	39.2
Scaffold_10392	NC_008799	80.488	41	8	0	181	221	38202	38242	0.045	39.2
Scaffold_10392	NC_008798	82.051	39	7	0	183	221	38187	38225	0.045	39.2
Scaffold_10392	NC_008583	82.051	39	7	0	183	221	38605	38643	0.045	39.2
Scaffold_10392	NC_007065	80.488	41	8	0	181	221	20979	21019	0.045	39.2
Scaffold_10392	NC_007064	80.488	41	8	0	181	221	21148	21188	0.045	39.2
Scaffold_10392	NC_007063	80.488	41	8	0	181	221	21151	21191	0.045	39.2
Scaffold_10392	NC_007061	80.488	41	8	0	181	221	21265	21305	0.045	39.2
Scaffold_10392	NC_007060	80.488	41	8	0	181	221	21112	21152	0.045	39.2
Scaffold_10392	NC_007059	80.488	41	8	0	181	221	20981	21021	0.045	39.2
Scaffold_10392	NC_007058	80.488	41	8	0	181	221	22190	22230	0.045	39.2
Scaffold_10392	NC_007057	80.488	41	8	0	181	221	21465	21505	0.045	39.2
Scaffold_10392	NC_007050	82.051	39	7	0	183	221	22233	22271	0.045	39.2
Scaffold_10392	NC_007048	82.051	39	7	0	183	221	22067	22105	0.045	39.2
Scaffold_10392	NC_004615	82.051	39	7	0	183	221	38492	38530	0.045	39.2
Scaffold_10392	NC_003288	80.488	41	8	0	181	221	38001	38041	0.045	39.2
Scaffold_10392	JX274647	82.051	39	7	0	183	221	37922	37960	0.045	39.2
Scaffold_10392	JX274646	82.051	39	7	0	183	221	38886	38924	0.045	39.2
Scaffold_10392	DQ908929	80.488	41	8	0	181	221	36346	36386	0.045	39.2
Scaffold_10392	DQ530362	82.051	39	7	0	183	221	38660	38698	0.045	39.2
Scaffold_10392	DQ530360	82.051	39	7	0	183	221	38599	38637	0.045	39.2
Scaffold_10393	NC_011614	82.927	41	7	0	94	134	37177	37217	0.003	42.8
Scaffold_10393	NC_024391	80.488	41	8	0	94	134	36703	36743	0.032	39.2
Scaffold_10393	NC_023500	80.488	41	8	0	94	134	36891	36931	0.032	39.2
Scaffold_10393	NC_021863	80.488	41	8	0	94	134	37640	37680	0.032	39.2
Scaffold_10393	NC_021332	80.488	41	8	0	94	134	37485	37525	0.032	39.2
Scaffold_10393	NC_021326	80.488	41	8	0	94	134	7790	7750	0.032	39.2
Scaffold_10393	NC_017968	82.051	39	7	0	96	134	14912	14874	0.032	39.2
Scaffold_10393	NC_014460	82.051	39	7	0	96	134	19647	19685	0.032	39.2
Scaffold_10393	NC_010147	80.488	41	8	0	94	134	38097	38137	0.032	39.2
Scaffold_10393	NC_008799	80.488	41	8	0	94	134	38202	38242	0.032	39.2
Scaffold_10393	NC_008798	82.051	39	7	0	96	134	38187	38225	0.032	39.2
Scaffold_10393	NC_008583	82.051	39	7	0	96	134	38605	38643	0.032	39.2
Scaffold_10393	NC_007065	80.488	41	8	0	94	134	20979	21019	0.032	39.2
Scaffold_10393	NC_007064	80.488	41	8	0	94	134	21148	21188	0.032	39.2
Scaffold_10393	NC_007063	80.488	41	8	0	94	134	21151	21191	0.032	39.2
Scaffold_10393	NC_007061	80.488	41	8	0	94	134	21265	21305	0.032	39.2
Scaffold_10393	NC_007060	80.488	41	8	0	94	134	21112	21152	0.032	39.2
Scaffold_10393	NC_007059	80.488	41	8	0	94	134	20981	21021	0.032	39.2
Scaffold_10393	NC_007058	80.488	41	8	0	94	134	22190	22230	0.032	39.2
Scaffold_10393	NC_007057	80.488	41	8	0	94	134	21465	21505	0.032	39.2
Scaffold_10393	NC_007050	82.051	39	7	0	96	134	22233	22271	0.032	39.2
Scaffold_10393	NC_007048	82.051	39	7	0	96	134	22067	22105	0.032	39.2
Scaffold_10393	NC_004615	82.051	39	7	0	96	134	38492	38530	0.032	39.2
Scaffold_10393	NC_003288	80.488	41	8	0	94	134	38001	38041	0.032	39.2
Scaffold_10393	JX274647	82.051	39	7	0	96	134	37922	37960	0.032	39.2
Scaffold_10393	JX274646	82.051	39	7	0	96	134	38886	38924	0.032	39.2
Scaffold_10393	DQ908929	80.488	41	8	0	94	134	36346	36386	0.032	39.2
Scaffold_10393	DQ530362	82.051	39	7	0	96	134	38660	38698	0.032	39.2
Scaffold_10393	DQ530360	82.051	39	7	0	96	134	38599	38637	0.032	39.2
Scaffold_104	NC_020845	71.93	114	32	0	13179	13292	95046	94933	6.05e-07	62.6
Scaffold_104	NC_015284	71.93	114	32	0	13179	13292	19075	19188	6.05e-07	62.6
Scaffold_104	AP013402	84.314	51	6	2	33038	33088	14559	14511	0.004	50
Scaffold_104	AP013559	88.095	42	2	2	37534	37575	26460	26498	0.013	48.2
Scaffold_104	AJ969242	82.143	56	6	3	31757	31808	2859	2804	0.047	46.4
Scaffold_10400	NC_019507	77.966	59	9	3	163	217	70322	70264	0.041	39.2
Scaffold_10400	HM246722	77.966	59	9	3	163	217	14882	14940	0.041	39.2
Scaffold_10400	FN667788	77.966	59	9	3	163	217	156192	156134	0.041	39.2
Scaffold_10400	AP011616	95.833	24	1	0	185	208	145614	145637	0.041	39.2
Scaffold_10401	KJ545483	95.833	24	1	0	89	112	3293	3270	0.031	39.2
Scaffold_10402	JF767210	84.783	46	7	0	5095	5140	24846	24891	0.000154	51.8
Scaffold_10402	NC_018861	84.783	46	3	2	4514	4559	44040	43999	0.007	46.4
Scaffold_10402	NC_016562	84.783	46	3	2	4514	4559	130027	129986	0.007	46.4
Scaffold_10402	NC_015464	84.783	46	3	2	4514	4559	41223	41182	0.007	46.4
Scaffold_10402	KF148616	84.783	46	3	2	4514	4559	130265	130224	0.007	46.4
Scaffold_10402	FR823450	84.783	46	3	2	4514	4559	131111	131152	0.007	46.4
Scaffold_10407	AP013555	90.625	32	1	1	149	180	5095	5066	0.002	42.8
Scaffold_10407	NC_019726	96.154	26	0	1	25	49	91183	91158	0.029	39.2
Scaffold_10408	DQ004855	93.103	29	1	1	185	212	54836	54864	0.037	41
Scaffold_10413	JF731128	81.25	48	8	1	673	720	15694	15740	0.012	42.8
Scaffold_10414	NC_023719	86.486	37	2	1	359	392	94440	94476	0.012	42.8
Scaffold_10414	NC_019530	81.633	49	6	2	37	82	87748	87700	0.012	42.8
Scaffold_10414	NC_016073	81.633	49	6	2	37	82	86417	86369	0.012	42.8
Scaffold_10415	HQ317290	87.5	32	4	0	177	208	15131	15100	0.037	41
Scaffold_10416	NC_007581	82.927	41	5	1	456	496	128974	129012	0.031	41
Scaffold_10419	KC954775	93.333	30	2	0	2933	2962	97138	97167	0.005	46.4
Scaffold_10419	NC_023719	76.271	59	14	0	1018	1076	404977	404919	0.016	44.6
Scaffold_10419	KF021268	84.615	39	6	0	1353	1391	112351	112313	0.016	44.6
Scaffold_1042	AP013437	82.979	47	6	2	518	563	12862	12907	0.013	42.8
Scaffold_1042	HM137666	87.5	32	4	0	906	937	25755	25724	0.046	41
Scaffold_10420	NC_018855	96.429	28	1	0	14	41	75347	75374	0.000405	46.4
Scaffold_10420	KF562341	96.429	28	1	0	14	41	30661	30634	0.000405	46.4
Scaffold_10422	NC_008723	76.842	190	43	1	18	206	25451	25262	3.59e-33	141
Scaffold_10422	NC_018284	74.178	213	53	2	18	229	24098	23887	2.27e-29	129
Scaffold_10422	NC_008722	74.178	213	53	2	18	229	25011	24800	2.27e-29	129
Scaffold_10422	NC_020490	73.196	194	43	1	19	203	42788	42595	1.17e-26	120
Scaffold_10422	NC_020199	72.596	208	45	2	19	214	43583	43376	1.17e-26	120
Scaffold_10422	NC_019513	72.596	208	45	2	19	214	22620	22827	1.17e-26	120
Scaffold_10422	NC_012784	72.596	208	45	2	19	214	40547	40340	1.17e-26	120
Scaffold_10422	NC_008689	72.596	208	45	2	19	214	39221	39014	1.17e-26	120
Scaffold_10422	NC_008583	72.596	208	45	2	19	214	41656	41449	1.17e-26	120
Scaffold_10422	NC_007058	72.596	208	45	2	19	214	25243	25036	1.17e-26	120
Scaffold_10422	NC_007054	72.596	208	45	2	19	214	21146	20939	1.17e-26	120
Scaffold_10422	NC_007049	72.596	208	45	2	19	214	25176	24969	1.17e-26	120
Scaffold_10422	NC_005356	72.596	208	45	2	19	214	20299	20092	1.17e-26	120
Scaffold_10422	NC_002661	72.596	208	45	2	19	214	39650	39443	1.17e-26	120
Scaffold_10422	JX174275	72.596	208	45	2	19	214	22904	22697	1.17e-26	120
Scaffold_10422	DQ530362	72.596	208	45	2	19	214	41711	41504	1.17e-26	120
Scaffold_10422	AP011956	72.596	208	45	2	19	214	39133	38926	1.17e-26	120
Scaffold_10422	NC_017968	72.115	208	46	2	19	214	11862	12069	1.43e-25	116
Scaffold_10422	NC_011612	72.115	208	46	2	19	214	42851	42644	1.43e-25	116
Scaffold_10422	NC_007057	72.115	208	46	2	19	214	24517	24310	1.43e-25	116
Scaffold_10422	NC_022758	71.635	208	47	2	19	214	22664	22457	6.08e-24	111
Scaffold_10422	NC_007053	71.635	208	47	2	19	214	22972	22765	6.08e-24	111
Scaffold_10422	KJ596420	71.635	208	47	2	19	214	39337	39130	6.08e-24	111
Scaffold_10422	NC_023500	71.779	163	35	3	19	171	39874	39713	8.46e-16	84.2
Scaffold_10422	NC_021326	71.779	163	35	3	19	171	4807	4968	8.46e-16	84.2
Scaffold_10422	NC_003288	71.779	163	35	3	19	171	41050	40889	8.46e-16	84.2
Scaffold_10422	NC_008799	71.166	163	36	3	19	171	41251	41090	3.6e-14	78.8
Scaffold_10422	NC_007059	75.214	117	27	2	56	171	23917	23802	1.53e-12	73.4
Scaffold_10422	NC_008798	69.939	163	38	3	19	171	41234	41073	1.86e-11	69.8
Scaffold_10422	AP013562	80.952	42	5	1	195	233	22291	22250	0.032	39.2
Scaffold_10422	AP013475	83.333	42	4	2	104	144	33874	33913	0.032	39.2
Scaffold_10423	NC_017978	90	40	3	1	303	342	20390	20352	2.35e-05	51.8
Scaffold_10423	NC_008265	90	40	3	1	303	342	35344	35382	2.35e-05	51.8
Scaffold_10423	NC_015262	76.623	77	10	5	302	371	35587	35512	0.012	42.8
Scaffold_10423	NC_004112	84.211	38	6	0	359	396	18741	18704	0.012	42.8
Scaffold_10424	NC_024125	92.593	27	2	0	206	232	77887	77913	0.018	41
Scaffold_1043	NC_005066	88.889	36	4	0	6795	6830	154355	154390	0.003	48.2
Scaffold_1043	NC_019502	93.75	32	1	1	880	910	41938	41907	0.009	46.4
Scaffold_1043	NC_021789	84.783	46	5	2	3017	3062	41177	41134	0.031	44.6
Scaffold_1043	NC_007055	77.612	67	11	3	5836	5901	30272	30335	0.031	44.6
Scaffold_1043	KC438283	84.615	39	6	0	1142	1180	37558	37596	0.031	44.6
Scaffold_10430	NC_023719	76.023	171	41	0	141	311	189201	189031	1.33e-27	123
Scaffold_10430	NC_023719	88.889	36	4	0	3	38	189351	189316	8.37e-05	48.2
Scaffold_10436	NC_019521	87.879	33	2	1	172	202	43521	43489	0.049	39.2
Scaffold_10438	NC_018861	88.889	36	3	1	1011	1045	19034	19069	0.004	44.6
Scaffold_10438	NC_016562	88.889	36	3	1	1011	1045	105136	105171	0.004	44.6
Scaffold_10438	NC_015464	88.889	36	3	1	1011	1045	16188	16223	0.004	44.6
Scaffold_10438	KF148616	88.889	36	3	1	1011	1045	105372	105407	0.004	44.6
Scaffold_10438	FR823450	88.889	36	3	1	1011	1045	23548	23513	0.004	44.6
Scaffold_10438	DQ004855	96.296	27	1	0	874	900	58174	58200	0.004	44.6
Scaffold_10438	NC_023719	100	23	0	0	740	762	41831	41853	0.013	42.8
Scaffold_10438	AP013426	100	22	0	0	1003	1024	29151	29172	0.047	41
Scaffold_1044	NC_023719	68.717	374	89	13	17458	17825	181379	181028	5.52e-23	114
Scaffold_1044	NC_023719	88.095	42	5	0	9684	9725	157377	157336	0.000158	53.6
Scaffold_1044	NC_023719	85.106	47	7	0	19196	19242	179614	179568	0.000158	53.6
Scaffold_1044	NC_019526	74.747	99	25	0	12295	12393	321752	321654	2.51e-08	66.2
Scaffold_1044	NC_023561	69.182	159	43	2	12300	12455	61362	61517	3.06e-07	62.6
Scaffold_1044	NC_005135	74.725	91	23	0	12304	12394	65967	66057	1.07e-06	60.8
Scaffold_1044	KC954775	86.275	51	7	0	12345	12395	125599	125549	1.07e-06	60.8
Scaffold_1044	NC_014662	86	50	7	0	12346	12395	62059	62108	3.73e-06	59
Scaffold_1044	NC_024139	67.32	153	50	0	12303	12455	27368	27520	0.000553	51.8
Scaffold_1044	NC_017969	67.32	153	50	0	12303	12455	27081	27233	0.000553	51.8
Scaffold_1044	NC_015269	70.27	111	33	0	12345	12455	27445	27555	0.000553	51.8
Scaffold_1044	NC_010583	72.043	93	26	0	12303	12395	29186	29278	0.000553	51.8
Scaffold_1044	NC_024125	71.93	114	26	4	12345	12455	48794	48904	0.002	50
Scaffold_1044	NC_019503	71.93	114	26	4	12345	12455	60140	60250	0.002	50
Scaffold_1044	NC_019399	71.93	114	26	4	12345	12455	61467	61577	0.002	50
Scaffold_1044	NC_018855	80.769	52	10	0	12345	12396	43832	43781	0.002	50
Scaffold_1044	NC_014036	82	50	9	0	12346	12395	51333	51284	0.002	50
Scaffold_1044	JX128259	71.93	114	26	4	12345	12455	60294	60404	0.002	50
Scaffold_1044	HM137666	71.93	114	26	4	12345	12455	63615	63725	0.002	50
Scaffold_1044	HE956711	71.93	114	26	4	12345	12455	61477	61587	0.002	50
Scaffold_1044	AY587007	70	110	33	0	12346	12455	27647	27756	0.002	50
Scaffold_1044	AP011113	80.769	52	10	0	12345	12396	60835	60886	0.002	50
Scaffold_1044	6.66667e+06	71.93	114	26	4	12345	12455	61133	61243	0.002	50
Scaffold_1044	NZ_ACSJ01000018	87.179	39	5	0	16777	16815	6237	6275	0.007	48.2
Scaffold_1044	NC_007581	87.179	39	5	0	16777	16815	89021	88983	0.007	48.2
Scaffold_1044	NC_005066	70.536	112	29	2	12346	12455	53689	53798	0.007	48.2
Scaffold_1044	NC_020847	100	25	0	0	7912	7936	14919	14895	0.024	46.4
Scaffold_1044	NC_014663	88.571	35	4	0	21906	21940	1686	1720	0.024	46.4
Scaffold_10440	NC_021068	95.833	24	1	0	36	59	21302	21279	0.041	39.2
Scaffold_10441	NZ_ACSJ01000013	78.261	46	5	1	134	179	6768	6808	0.032	39.2
Scaffold_10444	1.13303e+06	83.333	42	7	0	1250	1291	16847	16806	0.007	44.6
Scaffold_10445	NC_020847	87.879	33	4	0	164	196	33199	33167	0.008	42.8
Scaffold_10446	KM051843	100	22	0	0	101	122	133039	133060	0.008	41
Scaffold_10446	6.66667e+06	92.593	27	2	0	94	120	68916	68890	0.008	41
Scaffold_10446	NC_006882	87.097	31	4	0	154	184	14102	14132	0.028	39.2
Scaffold_10450	HM072038	75.458	982	227	6	1	978	31704	32675	0	670
Scaffold_10450	NC_019456	72.414	87	24	0	446	532	36811	36897	7.97e-05	50
Scaffold_10450	NC_023717	86.486	37	3	1	17	51	4392	4428	0.012	42.8
Scaffold_10451	NC_018861	86.111	36	3	1	9	44	115328	115295	0.027	41
Scaffold_10457	NC_024205	89.189	37	2	2	1252	1288	91245	91211	0.016	42.8
Scaffold_10457	NC_018856	85.106	47	4	3	1242	1288	65973	65930	0.016	42.8
Scaffold_10458	NC_019521	87.879	33	3	1	54	85	96684	96652	0.027	39.2
Scaffold_10462	NC_019456	100	22	0	0	217	238	5465	5444	0.024	41
Scaffold_10472	NC_022918	86.842	38	3	1	1	36	112003	112040	0.003	44.6
Scaffold_10472	NC_019726	86.842	38	3	1	1	36	122459	122422	0.003	44.6
Scaffold_10472	NC_019448	86.842	38	3	1	1	36	106866	106903	0.003	44.6
Scaffold_10472	EU418428	86.842	38	3	1	1	36	108250	108287	0.003	44.6
Scaffold_10472	AY176327	86.842	38	3	1	1	36	101193	101230	0.003	44.6
Scaffold_10472	AP013478	92.593	27	2	0	282	308	9707	9733	0.031	41
Scaffold_10483	NC_007581	88.235	34	2	1	429	462	134885	134916	0.022	41
Scaffold_10483	NC_002214	90	30	3	0	13	42	27575	27546	0.022	41
Scaffold_10483	GQ451696	85.366	41	4	2	91	129	24330	24370	0.022	41
Scaffold_10484	NC_014457	93.548	31	2	0	679	709	27286	27256	0.000462	48.2
Scaffold_10485	NC_024205	84.615	39	3	1	496	531	133512	133474	0.019	42.8
Scaffold_10485	NC_018856	84.615	39	3	1	496	531	107518	107480	0.019	42.8
Scaffold_10489	6.66667e+06	80.392	51	6	2	582	629	55088	55137	0.008	42.8
Scaffold_10489	NC_015284	92.593	27	2	0	593	619	95912	95886	0.026	41
Scaffold_1049	NC_021773	77.941	68	6	3	146	204	4510	4577	0.00059	50
Scaffold_1049	NC_008617	77.941	68	6	3	146	204	36698	36765	0.00059	50
Scaffold_1049	KJ596420	77.941	68	6	3	146	204	36414	36481	0.00059	50
Scaffold_1049	KF831354	77.941	68	6	3	146	204	6611	6544	0.00059	50
Scaffold_1049	AP011956	77.941	68	6	3	146	204	37775	37842	0.00059	50
Scaffold_1049	NC_012784	76.471	68	7	3	146	204	39188	39255	0.007	46.4
Scaffold_1049	NC_008689	76.471	68	7	3	146	204	37863	37930	0.007	46.4
Scaffold_10492	AP013408	96	25	1	0	208	232	1631	1607	0.021	41
Scaffold_10493	NC_013696	84.783	46	6	1	197	241	31332	31377	0.000119	48.2
Scaffold_10497	NC_021806	71.951	82	23	0	2133	2214	95305	95224	0.009	44.6
Scaffold_10497	AP013472	92.857	28	2	0	2139	2166	29561	29588	0.031	42.8
Scaffold_10498	NC_021539	87.879	33	2	1	4	36	13874	13904	0.032	39.2
Scaffold_10498	NC_003291	87.879	33	2	1	4	36	13852	13882	0.032	39.2
Scaffold_10501	NC_021773	78	100	22	0	2512	2611	6934	6835	8.19e-14	82.4
Scaffold_10501	KF831354	78	100	22	0	2512	2611	2933	3032	8.19e-14	82.4
Scaffold_10501	NC_008617	77	100	23	0	2512	2611	40282	40183	3.48e-12	77
Scaffold_10501	NC_007052	81.538	65	12	0	2799	2863	23639	23575	2.2e-08	64.4
Scaffold_10501	NC_007052	65.854	246	79	3	2102	2343	24336	24092	3.26e-06	57.2
Scaffold_10503	KC348598	93.548	31	2	0	71	101	20710	20740	7.64e-05	48.2
Scaffold_10503	NC_008721	90	30	3	0	71	100	22323	22294	0.011	41
Scaffold_10505	NC_015250	100	26	0	0	472	497	46836	46861	0.000728	48.2
Scaffold_10505	AP013412	96.429	28	1	0	458	485	34187	34214	0.003	46.4
Scaffold_10505	AP013407	92.857	28	2	0	458	485	21882	21909	0.031	42.8
Scaffold_10506	NC_020201	100	22	0	0	456	477	25190	25169	0.025	41
Scaffold_10507	JF773396	85	40	2	1	250	289	5064	5099	0.004	44.6
Scaffold_10507	NC_023500	83.333	42	5	1	160	201	41912	41951	0.013	42.8
Scaffold_10507	NC_021863	83.333	42	5	1	160	201	42102	42141	0.013	42.8
Scaffold_10507	NC_007060	83.333	42	5	1	160	201	25638	25677	0.013	42.8
Scaffold_10507	NC_004615	83.333	42	5	1	160	201	42952	42991	0.013	42.8
Scaffold_10507	JX274647	83.333	42	5	1	160	201	42382	42421	0.013	42.8
Scaffold_10507	NC_023719	75.758	66	9	3	356	421	294891	294949	0.047	41
Scaffold_10507	NC_018087	100	22	0	0	363	384	102614	102635	0.047	41
Scaffold_10507	AP013376	78.333	60	8	3	88	146	21082	21027	0.047	41
Scaffold_10509	NC_019726	85	40	1	2	54	93	77541	77507	0.029	41
Scaffold_10509	EU418428	85	40	1	2	54	93	10581	10615	0.029	41
Scaffold_10509	AY176327	85	40	1	2	54	93	3534	3568	0.029	41
Scaffold_1051	NC_009815	78.689	61	10	2	5635	5694	22767	22709	0.01	46.4
Scaffold_1051	NC_022758	88.235	34	4	0	9171	9204	4627	4594	0.036	44.6
Scaffold_1051	NC_020199	88.235	34	4	0	9171	9204	25317	25284	0.036	44.6
Scaffold_1051	NC_019513	88.235	34	4	0	9171	9204	40908	40941	0.036	44.6
Scaffold_1051	NC_019507	93.103	29	2	0	9913	9941	150532	150560	0.036	44.6
Scaffold_1051	NC_011612	88.235	34	4	0	9171	9204	24567	24534	0.036	44.6
Scaffold_1051	NC_007054	88.235	34	4	0	9171	9204	4617	4584	0.036	44.6
Scaffold_1051	NC_007052	88.235	34	4	0	9171	9204	4616	4583	0.036	44.6
Scaffold_1051	NC_002661	88.235	34	4	0	9171	9204	21358	21325	0.036	44.6
Scaffold_10510	NC_019915	79.167	48	10	0	8	55	25762	25809	0.004	42.8
Scaffold_10515	NC_024144	86.842	38	5	0	63	100	31104	31141	0.001	46.4
Scaffold_10515	NC_024205	86.111	36	5	0	1064	1099	37474	37439	0.015	42.8
Scaffold_10515	NC_018856	86.111	36	5	0	1064	1099	11598	11563	0.015	42.8
Scaffold_10516	NC_021863	82.051	39	7	0	98	136	16451	16489	0.036	39.2
Scaffold_10516	NC_007058	82.051	39	7	0	98	136	43085	43123	0.036	39.2
Scaffold_10517	NC_017984	82.5	40	3	1	356	395	15332	15297	0.043	41
Scaffold_10517	AP013370	96	25	1	0	951	975	2826	2802	0.043	41
Scaffold_10517	6.66667e+06	100	22	0	0	649	670	18123	18144	0.043	41
Scaffold_10519	NC_014636	80.851	47	8	1	7	52	202800	202846	0.021	41
Scaffold_1052	FR775895	93.103	29	2	0	5104	5132	8703	8731	0.028	44.6
Scaffold_10521	NC_015465	81.395	43	8	0	211	253	24896	24938	0.008	42.8
Scaffold_10522	NC_007056	86.842	38	4	1	268	305	27564	27528	0.022	42.8
Scaffold_10523	NC_018861	84.211	38	4	1	75	112	100533	100568	0.03	39.2
Scaffold_10525	NC_018856	90.323	31	1	1	382	410	151337	151367	0.019	41
Scaffold_10526	KM051843	74.699	83	17	4	346	427	7616	7537	0.027	41
Scaffold_10529	NC_007581	82.5	40	7	0	555	594	7085	7046	0.046	41
Scaffold_1053	NC_021861	90.909	33	2	1	841	872	8630	8662	0.011	42.8
Scaffold_1053	JX564242	90.909	33	2	1	841	872	10809	10841	0.011	42.8
Scaffold_10531	NC_016562	85	40	5	1	186	224	35028	34989	0.012	42.8
Scaffold_10531	NC_009813	77.358	53	12	0	467	519	27541	27489	0.012	42.8
Scaffold_10531	KF148616	85	40	5	1	186	224	35262	35223	0.012	42.8
Scaffold_10531	FR823450	85	40	5	1	186	224	93447	93486	0.012	42.8
Scaffold_10531	NC_001884	78.431	51	9	1	469	517	66120	66170	0.043	41
Scaffold_10532	NC_018088	92.857	28	2	0	439	466	4000	4027	0.009	42.8
Scaffold_10534	AY587007	93.103	29	1	1	208	235	7945	7917	0.013	41
Scaffold_10534	AY587007	93.103	29	1	1	208	235	119558	119530	0.013	41
Scaffold_10534	AP013561	92.857	28	1	1	222	249	34177	34203	0.047	39.2
Scaffold_10537	NC_019909	87.879	33	1	1	571	600	126068	126100	0.04	41
Scaffold_1054	NC_011421	85.714	35	5	0	711	745	107496	107462	0.039	41
Scaffold_10544	NC_021806	83.721	43	5	2	152	194	65681	65721	0.048	39.2
Scaffold_10544	AP013374	92.308	26	2	0	253	278	16571	16546	0.048	39.2
Scaffold_10545	NC_008689	73.894	226	38	9	11	219	40075	40296	1.18e-26	120
Scaffold_10546	NC_022769	90.323	31	3	0	814	844	111778	111748	0.018	42.8
Scaffold_10547	NC_014036	90.323	31	3	0	156	186	60804	60774	0.002	42.8
Scaffold_10547	NC_023719	92.593	27	2	0	93	119	264163	264137	0.009	41
Scaffold_10549	NC_021864	82.5	40	7	0	77	116	34597	34636	0.026	41
Scaffold_10550	NC_019401	96	25	1	0	252	276	235141	235165	0.012	41
Scaffold_10550	KC348602	87.5	32	4	0	218	249	34363	34332	0.012	41
Scaffold_10550	AP013398	76.667	60	11	2	167	223	26344	26403	0.041	39.2
Scaffold_10552	NC_019490	93.333	30	1	1	1512	1541	38700	38728	0.024	42.8
Scaffold_10557	NC_023498	86.486	37	5	0	1775	1811	26756	26720	0.014	44.6
Scaffold_10559	NC_007581	87.5	32	4	0	633	664	126739	126770	0.039	41
Scaffold_1056	AY583235	80.328	61	11	1	2254	2313	67	7	0.000123	53.6
Scaffold_1056	AP013445	89.744	39	3	1	768	806	2374	2337	0.001	50
Scaffold_10560	NC_022791	76.056	71	17	0	293	363	4267	4337	8.36e-06	51.8
Scaffold_10560	DQ113772	76.056	71	17	0	293	363	28161	28091	8.36e-06	51.8
Scaffold_10560	NC_024385	80.952	42	8	0	323	364	16719	16678	0.015	41
Scaffold_10560	NC_019782	82.5	40	7	0	311	350	12602	12563	0.015	41
Scaffold_10560	NC_018273	80.952	42	8	0	323	364	17038	16997	0.015	41
Scaffold_10563	KC295538	87.5	32	4	0	287	318	300669	300700	0.019	41
Scaffold_10563	AP013444	83.333	48	4	3	239	283	37498	37452	0.019	41
Scaffold_10564	NC_007581	80.952	42	8	0	289	330	3536	3495	0.016	41
Scaffold_10568	HM072038	90.217	92	9	0	815	906	38507	38598	5.08e-27	125
Scaffold_10568	HM072038	89.333	75	8	0	397	471	37890	37964	2.02e-19	100
Scaffold_10572	NC_023719	81.633	49	5	2	13	60	255879	255924	0.006	42.8
Scaffold_10575	NC_001884	74.799	623	157	0	1599	2221	9681	9059	1.38e-114	416
Scaffold_10575	NC_001884	76.518	247	55	2	1353	1596	9842	9596	6.31e-43	178
Scaffold_10579	NC_019909	80	45	7	1	56	98	129583	129627	0.028	39.2
Scaffold_10580	NC_022915	92.857	28	2	0	1964	1991	31571	31598	0.035	42.8
Scaffold_10581	AB910392	100	23	0	0	1298	1320	51229	51207	0.027	42.8
Scaffold_10583	NC_021782	93.103	29	1	1	53	80	65607	65635	0.036	41
Scaffold_10583	NC_021772	93.103	29	1	1	53	80	70688	70716	0.036	41
Scaffold_10583	AP013408	93.103	29	1	1	4	32	25749	25776	0.036	41
Scaffold_10585	NC_023551	93.103	29	0	1	738	764	976	948	0.043	41
Scaffold_10585	NC_021071	93.103	29	1	1	987	1014	50868	50840	0.043	41
Scaffold_10585	NC_012663	87.5	32	4	0	684	715	11801	11832	0.043	41
Scaffold_10586	NC_023007	82.051	39	7	0	220	258	72057	72095	0.037	39.2
Scaffold_10589	NC_009812	87.5	32	4	0	434	465	13512	13481	0.046	41
Scaffold_10591	NC_019526	88.235	34	3	1	288	320	192555	192522	0.034	41
Scaffold_10592	KF751795	74.648	71	18	0	155	225	9498	9428	6.38e-05	48.2
Scaffold_10600	NC_022771	72.619	168	39	5	1230	1396	148569	148730	7.31e-14	80.6
Scaffold_10600	NC_022771	84.783	46	7	0	1371	1416	1429	1474	3.54e-05	51.8
Scaffold_10600	NC_022771	84.783	46	7	0	1371	1416	153869	153914	3.54e-05	51.8
Scaffold_10600	KM051843	92.857	42	3	0	773	814	11701	11660	1.96e-08	62.6
Scaffold_10600	NC_019448	91.176	34	3	0	1082	1115	131809	131842	0.000432	48.2
Scaffold_10600	FN667789	78.261	69	11	3	10	76	117189	117255	0.000432	48.2
Scaffold_10600	NC_021856	80.303	66	9	4	1355	1416	1408	1473	0.002	46.4
Scaffold_10600	NC_021856	80.303	66	9	4	1355	1416	151936	152001	0.002	46.4
Scaffold_10600	NC_021856	82.609	46	7	1	1372	1416	1154	1199	0.005	44.6
Scaffold_10600	NC_021856	82.609	46	7	1	1372	1416	151682	151727	0.005	44.6
Scaffold_10600	NC_022769	82.609	46	7	1	1081	1125	158740	158785	0.005	44.6
Scaffold_10600	NC_020873	75.758	66	14	1	1088	1153	43400	43337	0.005	44.6
Scaffold_10600	DQ004855	73.973	73	18	1	1367	1438	99049	99121	0.018	42.8
Scaffold_10602	NC_021071	89.189	37	3	1	3400	3435	46818	46854	0.004	46.4
Scaffold_10605	NC_007924	87.097	31	4	0	142	172	27774	27804	0.035	39.2
Scaffold_10606	NZ_ACSJ01000015	79.592	49	9	1	50	97	2010	2058	0.013	41
Scaffold_10608	NC_019507	100	21	0	0	158	178	169630	169650	0.046	39.2
Scaffold_10608	HM246724	100	21	0	0	158	178	15485	15505	0.046	39.2
Scaffold_10608	FN667789	100	21	0	0	158	178	110431	110411	0.046	39.2
Scaffold_10608	FN667788	100	21	0	0	158	178	110017	109997	0.046	39.2
Scaffold_1061	NC_018861	90.909	33	2	1	168	200	28882	28913	0.019	42.8
Scaffold_1061	NC_016562	90.909	33	2	1	168	200	114838	114869	0.019	42.8
Scaffold_1061	NC_015464	86.111	36	5	0	1335	1370	26501	26466	0.019	42.8
Scaffold_1061	KF148616	90.909	33	2	1	168	200	115074	115105	0.019	42.8
Scaffold_1061	FR823450	90.909	33	2	1	168	200	13846	13815	0.019	42.8
Scaffold_10610	AP013429	88.235	34	4	0	1828	1861	28150	28183	0.009	44.6
Scaffold_10610	NC_020845	84.211	38	6	0	45	82	26986	27023	0.032	42.8
Scaffold_10610	NC_002515	81.395	43	8	0	119	161	10535	10577	0.032	42.8
Scaffold_10611	NC_020490	86.486	37	4	1	830	866	27666	27631	0.038	41
Scaffold_10611	6.66667e+06	85.366	41	4	2	303	342	2171	2132	0.038	41
Scaffold_10612	6.66667e+06	92.593	27	2	0	84	110	8384	8410	0.015	41
Scaffold_10615	6.66667e+06	90	30	3	0	340	369	105647	105618	0.031	41
Scaffold_10616	AP013545	88.235	34	2	1	287	318	14195	14228	0.02	41
Scaffold_10618	NC_009812	91.429	35	3	0	1215	1249	40653	40687	0.000109	50
Scaffold_10619	NC_009810	82.5	40	7	0	117	156	18308	18269	0.011	41
Scaffold_10619	NC_009817	95.833	24	1	0	55	78	65207	65230	0.037	39.2
Scaffold_1062	AP013383	86.486	37	5	0	1393	1429	15569	15605	0.015	44.6
Scaffold_10621	NC_018859	93.333	30	1	1	739	767	15860	15831	0.01	42.8
Scaffold_10622	NC_010583	88.235	34	3	1	48	81	34627	34595	0.012	41
Scaffold_10622	NC_009815	95.833	24	1	0	289	312	15694	15717	0.043	39.2
Scaffold_10627	NC_021073	87.879	33	4	0	568	600	83403	83371	0.01	42.8
Scaffold_10630	NC_013696	76.036	1206	226	20	3	1167	33691	34874	0	839
Scaffold_10630	NC_023571	73.529	340	88	2	230	568	5626	5964	2.48e-50	201
Scaffold_10630	NC_023560	73.529	340	88	2	230	568	5625	5963	2.48e-50	201
Scaffold_10630	NC_023559	73.529	340	88	2	230	568	5631	5969	2.48e-50	201
Scaffold_10630	GQ478087	93.421	76	5	0	1096	1171	9728	9803	2.83e-24	114
Scaffold_10630	GQ478087	82	50	7	1	1157	1206	10107	10154	0.000345	48.2
Scaffold_10630	GQ478082	93.421	76	5	0	1096	1171	8597	8672	2.83e-24	114
Scaffold_10630	GQ478082	82	50	7	1	1157	1206	8976	9023	0.000345	48.2
Scaffold_10630	NC_009810	66.526	475	123	14	267	714	31112	31577	1.2e-22	109
Scaffold_10630	GQ478085	92.208	77	5	1	1096	1171	9190	9266	1.2e-22	109
Scaffold_10630	GQ478085	82	50	7	1	1157	1206	9570	9617	0.000345	48.2
Scaffold_10630	NC_007060	66.837	196	41	7	527	716	36239	36416	2.83e-05	51.8
Scaffold_10630	NC_004996	89.474	38	4	0	527	564	8351	8388	2.83e-05	51.8
Scaffold_10630	NC_004996	100	26	0	0	644	669	8453	8478	0.000345	48.2
Scaffold_10630	NC_024391	93.333	30	2	0	527	556	7789	7818	0.001	46.4
Scaffold_10631	GQ478087	90.909	220	20	0	1	220	10142	10361	3.79e-83	307
Scaffold_10631	GQ478085	90.909	220	20	0	1	220	9605	9824	3.79e-83	307
Scaffold_10631	GQ478082	90.909	220	20	0	1	220	9011	9230	3.79e-83	307
Scaffold_10631	NC_024370	77.586	58	13	0	15	72	28581	28524	0.000197	46.4
Scaffold_10631	NC_024361	77.586	58	13	0	15	72	25604	25547	0.000197	46.4
Scaffold_10632	GQ478082	96.988	166	5	0	237	402	9401	9236	1.25e-73	277
Scaffold_10632	GQ478087	86.667	165	22	0	238	402	10531	10367	2.75e-50	199
Scaffold_10632	GQ478087	70.455	176	46	3	22	194	12922	12750	7.9e-13	75.2
Scaffold_10632	GQ478085	86.667	165	22	0	238	402	9994	9830	2.75e-50	199
Scaffold_10638	NC_021773	83.673	49	6	2	333	379	3997	3949	0.001	46.4
Scaffold_10638	NC_012784	83.673	49	6	2	333	379	38675	38627	0.001	46.4
Scaffold_10638	NC_008689	83.673	49	6	2	333	379	37350	37302	0.001	46.4
Scaffold_10638	KJ596420	83.673	49	6	2	333	379	35901	35853	0.001	46.4
Scaffold_10639	NC_019526	77.419	62	13	1	525	585	40399	40338	0.003	46.4
Scaffold_10639	AP013496	86.364	44	4	2	1911	1953	10875	10917	0.003	46.4
Scaffold_10639	NC_023007	91.176	34	2	1	506	538	154709	154742	0.009	44.6
Scaffold_1064	NC_014900	88.235	34	4	0	370	403	34010	34043	0.006	44.6
Scaffold_1064	NC_011802	88.235	34	4	0	370	403	34950	34983	0.006	44.6
Scaffold_10643	NC_023719	92.593	27	2	0	92	118	292703	292729	0.024	41
Scaffold_10643	6.66667e+06	79.167	48	7	1	100	144	31857	31810	0.024	41
Scaffold_10644	NC_007045	69.583	240	64	5	970	1204	1799	2034	1.39e-16	89.7
Scaffold_10644	NC_015464	82.979	47	8	0	498	544	83153	83107	0.000122	50
Scaffold_10644	NC_020490	70.297	101	30	0	1093	1193	17884	17984	0.000426	48.2
Scaffold_10644	NC_018861	80.851	47	9	0	498	544	85451	85405	0.005	44.6
Scaffold_10644	NC_016562	80.851	47	9	0	498	544	35533	35487	0.005	44.6
Scaffold_10644	KF148616	80.851	47	9	0	498	544	35767	35721	0.005	44.6
Scaffold_10644	FR823450	80.851	47	9	0	498	544	92942	92988	0.005	44.6
Scaffold_10644	AP013475	90.323	31	3	0	62	92	1327	1297	0.018	42.8
Scaffold_10644	AP013474	90.323	31	3	0	62	92	17415	17385	0.018	42.8
Scaffold_10644	6.66667e+06	85	40	5	1	894	932	15348	15387	0.018	42.8
Scaffold_10647	HM246721	88.235	34	4	0	246	279	29733	29766	0.001	44.6
Scaffold_10647	FN667788	88.235	34	4	0	246	279	14245	14212	0.001	44.6
Scaffold_10650	6.66667e+06	82.609	46	7	1	92	137	47493	47449	0.000688	44.6
Scaffold_10650	AJ969242	89.655	29	3	0	83	111	4229	4257	0.029	39.2
Scaffold_10652	AP013388	79.032	62	9	2	1108	1168	3004	2946	0.00046	48.2
Scaffold_10655	NC_019721	87.879	33	4	0	232	264	18854	18822	0.003	42.8
Scaffold_10655	JN849462	85.366	41	3	2	20	57	86688	86728	0.011	41
Scaffold_10655	NC_023595	87.097	31	4	0	202	232	11838	11868	0.037	39.2
Scaffold_10656	NC_002185	83.721	43	6	1	285	326	19676	19718	0.023	42.8
Scaffold_10661	NC_019549	78.125	64	10	2	1379	1438	15952	15889	0.000777	48.2
Scaffold_10661	AP013436	91.176	34	3	0	71	104	10561	10528	0.000777	48.2
Scaffold_10661	NC_023007	80.769	52	9	1	1353	1404	30367	30317	0.003	46.4
Scaffold_10661	KF021268	96.154	26	1	0	1450	1475	81413	81438	0.033	42.8
Scaffold_10661	6.66667e+06	84.211	38	6	0	1353	1390	37888	37851	0.033	42.8
Scaffold_10663	AP013478	85.714	42	3	1	2348	2389	9201	9239	0.002	48.2
Scaffold_10663	AP013406	88.571	35	4	0	5154	5188	32913	32947	0.006	46.4
Scaffold_10663	NC_009018	93.103	29	2	0	1068	1096	14319	14291	0.02	44.6
Scaffold_10664	KF301602	78.571	56	11	1	2626	2680	12798	12853	0.015	44.6
Scaffold_10665	AP013416	92.593	27	2	0	60	86	21998	22024	0.009	41
Scaffold_10665	AP013413	92.593	27	2	0	60	86	19598	19572	0.009	41
Scaffold_10665	NC_021788	85.294	34	5	0	57	90	93017	93050	0.031	39.2
Scaffold_10665	NC_018855	83.333	36	6	0	54	89	25499	25464	0.031	39.2
Scaffold_10665	NC_009514	78.723	47	7	1	121	164	29370	29324	0.031	39.2
Scaffold_10665	KF562341	83.333	36	6	0	54	89	80131	80166	0.031	39.2
Scaffold_10667	GU071092	93.103	29	2	0	1017	1045	6875	6847	0.004	44.6
Scaffold_10667	AP013540	85	40	5	1	1019	1058	16731	16769	0.014	42.8
Scaffold_10669	NC_004303	88.235	34	4	0	5104	5137	22947	22914	0.026	44.6
Scaffold_10676	NC_004629	85.714	35	5	0	312	346	249597	249631	0.016	41
Scaffold_1068	NC_015279	80.952	42	8	0	99	140	10889	10848	0.008	41
Scaffold_1068	NC_021794	92.308	26	2	0	57	82	62516	62541	0.028	39.2
Scaffold_1068	NC_014662	95.833	24	1	0	78	101	865	888	0.028	39.2
Scaffold_1068	KJ716335	87.097	31	4	0	68	98	70791	70821	0.028	39.2
Scaffold_10683	JX486088	90.909	33	3	0	1313	1345	78718	78750	0.002	46.4
Scaffold_10687	AP013399	90.625	32	3	0	794	825	1114	1083	0.003	44.6
Scaffold_10687	KF751793	88.235	34	2	1	429	460	29920	29887	0.037	41
Scaffold_1069	NC_007917	88.889	36	3	1	27	61	46901	46866	0.007	44.6
Scaffold_1069	NC_007917	86.486	37	3	1	504	538	18100	18064	0.025	42.8
Scaffold_10693	NC_020201	93.333	30	1	1	3578	3607	93464	93492	0.05	42.8
Scaffold_10693	KF296717	86.111	36	5	0	378	413	40075	40040	0.05	42.8
Scaffold_10699	NC_005885	100	22	0	0	462	483	8219	8240	0.021	41
Scaffold_107	NC_014660	72.84	81	22	0	10798	10878	136863	136783	0.004	48.2
Scaffold_107	NC_018087	71.951	82	23	0	10798	10879	135733	135652	0.044	44.6
Scaffold_1070	NC_016564	71.765	85	24	0	2151	2235	18990	18906	0.003	46.4
Scaffold_1070	6.66667e+06	86.486	37	5	0	2549	2585	40242	40206	0.01	44.6
Scaffold_1070	AP013483	90.909	33	2	1	2526	2557	17917	17885	0.033	42.8
Scaffold_10700	NC_007021	83.784	37	6	0	18	54	30257	30293	0.01	41
Scaffold_10706	NC_019507	90.909	33	2	1	2085	2117	126850	126819	0.044	42.8
Scaffold_10706	NC_007055	100	23	0	0	3386	3408	22167	22145	0.044	42.8
Scaffold_10706	KC295538	84.211	38	6	0	3056	3093	14074	14111	0.044	42.8
Scaffold_10708	KF751795	90.476	42	2	2	595	634	31425	31384	5.16e-05	51.8
Scaffold_10708	KF751793	90.476	42	2	2	595	634	33946	33905	5.16e-05	51.8
Scaffold_10708	NC_019549	92.857	28	2	0	946	973	24664	24637	0.027	42.8
Scaffold_10708	NC_019549	92.857	28	2	0	946	973	31103	31076	0.027	42.8
Scaffold_10708	NC_011614	79.032	62	10	3	599	659	2035	1976	0.027	42.8
Scaffold_10708	NC_007021	92.857	28	2	0	738	765	81347	81374	0.027	42.8
Scaffold_10708	AP013400	96.154	26	1	0	2004	2029	21353	21328	0.027	42.8
Scaffold_10712	NC_021071	83.784	37	6	0	60	96	97402	97438	0.008	41
Scaffold_10714	NZ_ACSJ01000017	93.333	30	1	1	2587	2616	65609	65581	0.038	42.8
Scaffold_10714	NC_011398	87.879	33	4	0	2078	2110	16877	16845	0.038	42.8
Scaffold_10718	NC_023719	66.466	665	185	16	148	793	55079	54434	2.03e-36	156
Scaffold_10718	NC_022918	64.714	751	235	16	45	780	104374	103639	6.23e-24	114
Scaffold_10718	NC_022918	70	130	28	5	1150	1269	103269	103141	0.003	46.4
Scaffold_10718	NC_019726	64.424	773	237	17	45	798	130886	131639	2.17e-23	113
Scaffold_10718	NC_019726	70	130	28	5	1150	1269	131991	132119	0.003	46.4
Scaffold_10718	NC_023007	66.374	455	133	10	318	765	68393	67952	1.13e-20	104
Scaffold_10718	NC_019448	65.864	457	136	9	331	780	98944	98501	4.79e-19	98.7
Scaffold_10718	NC_019448	72.868	129	26	5	1150	1269	98131	98003	1.2e-07	60.8
Scaffold_10718	AY176327	64.143	753	236	17	45	780	91685	90950	5.83e-18	95.1
Scaffold_10718	AY176327	69.93	143	32	5	1150	1282	90580	90439	6.23e-05	51.8
Scaffold_10718	EU418428	64.011	753	237	17	45	780	98742	98007	7.1e-17	91.5
Scaffold_10718	EU418428	69.93	143	32	5	1150	1282	97637	97496	6.23e-05	51.8
Scaffold_10718	KF021268	66	400	122	7	332	727	62069	61680	2.48e-16	89.7
Scaffold_10718	KC595511	63.902	651	202	14	260	895	58552	59184	3.68e-14	82.4
Scaffold_10718	NC_001884	65.918	267	85	2	527	793	122067	121807	8.11e-10	68
Scaffold_10718	NC_019515	70.861	151	40	3	245	393	22311	22459	9.87e-09	64.4
Scaffold_10718	NC_022771	74.684	79	20	0	702	780	88443	88365	1.79e-05	53.6
Scaffold_10718	NC_007021	67.742	155	48	1	620	772	57803	57649	6.23e-05	51.8
Scaffold_10718	NC_018861	93.333	30	2	0	1403	1432	95093	95064	0.003	46.4
Scaffold_1072	NC_007581	96.429	28	0	1	466	492	76134	76161	0.015	42.8
Scaffold_1072	D90210	96.429	28	0	1	466	492	790	817	0.015	42.8
Scaffold_10720	NC_023582	82.353	51	6	2	672	720	8184	8135	0.001	46.4
Scaffold_10725	NC_019508	86.842	38	4	1	125	162	8066	8102	0.037	42.8
Scaffold_10725	NC_019506	86.842	38	4	1	125	162	7886	7922	0.037	42.8
Scaffold_10725	JF767210	86.842	38	4	1	125	162	8329	8365	0.037	42.8
Scaffold_1073	KF831354	79.452	146	18	6	1350	1485	4713	4856	1.93e-23	113
Scaffold_1073	KF831354	77.551	147	27	3	1721	1861	4715	4861	2.35e-22	109
Scaffold_1073	KF831354	80	55	7	2	1587	1640	4978	5029	0.008	44.6
Scaffold_1073	NC_021773	78.767	146	19	6	1350	1485	5154	5011	8.19e-22	107
Scaffold_1073	NC_021773	76.871	147	28	3	1721	1861	5152	5006	9.98e-21	104
Scaffold_1073	NC_021773	80	55	7	2	1587	1640	4889	4838	0.008	44.6
Scaffold_1073	NC_013195	78.767	146	19	6	1350	1485	38270	38127	8.19e-22	107
Scaffold_1073	NC_013195	76.871	147	28	3	1721	1861	38268	38122	9.98e-21	104
Scaffold_1073	NC_013195	80	55	7	2	1587	1640	38005	37954	0.008	44.6
Scaffold_1073	NC_008617	78.767	146	19	6	1350	1485	38502	38359	8.19e-22	107
Scaffold_1073	NC_008617	76.871	147	28	3	1721	1861	38500	38354	9.98e-21	104
Scaffold_1073	NC_008617	80	55	7	2	1587	1640	38237	38186	0.008	44.6
Scaffold_1073	KJ596420	79.699	133	15	6	1361	1483	38208	38078	3.48e-20	102
Scaffold_1073	KJ596420	75.887	141	28	3	1721	1855	38217	38077	1.8e-17	93.3
Scaffold_1073	KJ596420	80	55	7	2	1587	1640	37953	37902	0.008	44.6
Scaffold_1073	NC_007052	73.288	146	26	4	1721	1861	22178	22041	3.26e-14	82.4
Scaffold_1073	NC_007052	73.571	140	28	5	1350	1485	22180	22046	5.9e-11	71.6
Scaffold_1073	NC_007052	80	55	7	2	1587	1640	21924	21873	0.008	44.6
Scaffold_1073	NC_019443	100	23	0	0	1278	1300	45656	45678	0.029	42.8
Scaffold_10730	NC_021856	77.635	1404	308	4	1	1401	78730	77330	0	1104
Scaffold_10730	NC_021856	73.238	979	241	10	2234	3197	76412	75440	2.17e-157	558
Scaffold_10730	NC_021856	70.536	112	31	2	1694	1804	77020	76910	0.003	46.4
Scaffold_10730	NC_022771	73.527	1103	286	4	302	1401	75871	74772	0	661
Scaffold_10730	NC_022771	73.245	983	242	10	2230	3197	73858	72882	1.78e-158	562
Scaffold_10730	NC_024137	71.014	966	270	8	355	1315	77064	76104	6.64e-126	453
Scaffold_10730	NC_024137	68.881	572	163	10	2632	3197	74789	74227	8.11e-49	197
Scaffold_10730	NC_020873	70.769	975	271	10	348	1315	109396	110363	4.19e-122	441
Scaffold_10730	NC_020873	67.19	701	209	9	2506	3197	111566	112254	1.57e-51	206
Scaffold_10730	NC_020873	69.159	107	31	1	2297	2403	111362	111466	0.039	42.8
Scaffold_10730	JN797798	69.578	1019	300	4	302	1315	102979	103992	2.17e-119	432
Scaffold_10730	JN797798	66.126	555	169	10	2650	3196	105325	105868	4.21e-27	125
Scaffold_10730	JN797798	75	68	17	0	2317	2384	104995	105062	0.003	46.4
Scaffold_10730	KM051843	70.749	988	244	21	2234	3197	87741	88707	3.22e-117	425
Scaffold_10730	KM051843	69.238	1024	293	10	303	1315	86374	87386	3.67e-110	401
Scaffold_10730	NC_020081	70.306	980	262	17	2234	3197	80088	81054	3.02e-111	405
Scaffold_10730	NC_020081	71.528	576	162	2	303	877	77446	78020	1.37e-77	293
Scaffold_10730	NC_020081	70.07	284	85	0	885	1168	79303	79586	3.45e-28	129
Scaffold_10730	KJ489402	65.949	790	239	15	566	1342	73398	72626	3.23e-41	172
Scaffold_10730	KJ489402	65.314	542	175	8	2661	3197	72023	71490	3.94e-21	105
Scaffold_10730	NC_022769	65.311	787	249	12	566	1342	75210	74438	2.48e-36	156
Scaffold_10730	NC_022769	65.867	542	172	8	2661	3197	73835	73302	1.79e-25	120
Scaffold_10730	KF021268	72.168	309	74	6	2853	3155	42349	42047	8.67e-36	154
Scaffold_10730	KF021268	71.681	113	32	0	768	880	47442	47330	1.47e-07	60.8
Scaffold_10730	NC_022763	65.373	670	221	5	566	1231	75949	75287	1.06e-34	150
Scaffold_10730	NC_022763	66.422	545	164	13	2661	3197	74573	74040	2.18e-24	116
Scaffold_10730	NC_018856	67.76	549	150	15	2661	3197	46867	46334	3.69e-34	149
Scaffold_10730	NC_018856	70.391	179	53	0	567	745	48229	48051	1.29e-14	84.2
Scaffold_10730	NC_024205	67.949	546	154	15	2661	3197	72197	71664	1.29e-33	147
Scaffold_10730	NC_024205	70.391	179	53	0	567	745	73558	73380	1.29e-14	84.2
Scaffold_10730	6.66667e+06	65.85	612	202	5	566	1175	115388	115994	4.49e-33	145
Scaffold_10730	6.66667e+06	66.972	545	161	13	2661	3197	116764	117297	9.89e-29	131
Scaffold_10730	DQ004855	71.053	266	65	6	2935	3194	38847	38588	2.18e-24	116
Scaffold_10730	DQ004855	70.659	167	45	4	794	958	42211	42047	3.46e-09	66.2
Scaffold_10730	AB609718	67.836	342	108	2	2854	3194	45165	44825	7.6e-24	114
Scaffold_10730	AB609718	69.231	156	46	2	801	955	46755	46601	5.13e-07	59
Scaffold_10730	AB609718	70.866	127	27	4	1104	1225	46440	46319	2.18e-05	53.6
Scaffold_10730	NC_022918	72.472	178	41	4	2983	3156	85237	85064	3.03e-16	89.7
Scaffold_10730	NC_020877	66.949	354	103	9	2848	3194	45227	44881	1.29e-14	84.2
Scaffold_10730	NC_019511	66.949	354	103	9	2848	3194	77409	77755	1.29e-14	84.2
Scaffold_10730	NC_024211	66.205	361	105	9	2846	3196	75588	75235	1.91e-12	77
Scaffold_10730	NC_019448	70.787	178	44	4	2983	3156	81354	81181	1.91e-12	77
Scaffold_10730	EU418428	70.621	177	46	3	2983	3156	80841	80668	1.91e-12	77
Scaffold_10730	EU418428	68	125	40	0	768	892	86042	85918	0.003	46.4
Scaffold_10730	AY176327	70.621	177	46	3	2983	3156	73784	73611	1.91e-12	77
Scaffold_10730	AY176327	68	125	40	0	768	892	78985	78861	0.003	46.4
Scaffold_10730	NC_019726	70.225	178	45	4	2983	3156	6991	7164	8.13e-11	71.6
Scaffold_10730	NC_007021	63.499	463	150	7	2698	3152	40215	39764	5.13e-07	59
Scaffold_10730	NC_016563	75.641	78	19	0	2662	2739	49798	49721	6.25e-06	55.4
Scaffold_10730	NC_018857	75.61	82	18	2	872	952	112388	112468	7.61e-05	51.8
Scaffold_10730	KC295538	81.25	48	8	1	1395	1442	98156	98110	0.039	42.8
Scaffold_10731	NC_019500	81.395	43	7	1	48	89	40518	40560	0.039	39.2
Scaffold_10731	AB626963	81.25	48	7	2	80	127	16606	16651	0.039	39.2
Scaffold_10734	NC_018831	100	21	0	0	171	191	33036	33016	0.035	39.2
Scaffold_10737	NC_020849	93.103	29	2	0	1561	1589	59247	59219	0.006	44.6
Scaffold_10738	NC_015569	90.909	33	2	1	1815	1847	40399	40368	0.039	42.8
Scaffold_10739	NC_023007	79.592	49	8	1	506	552	24456	24408	0.042	41
Scaffold_1074	NC_019782	87.805	41	3	2	117	156	36498	36537	0.014	44.6
Scaffold_1074	NC_017732	82.353	51	7	2	430	478	27411	27461	0.014	44.6
Scaffold_10740	HM246720	100	24	0	0	1365	1388	19890	19913	0.009	44.6
Scaffold_10740	NC_019526	76.812	69	12	3	1438	1506	200161	200225	0.031	42.8
Scaffold_10745	NC_019506	82.051	39	7	0	40	78	12143	12105	0.027	39.2
Scaffold_10746	NC_022771	77.531	1215	265	5	6288	7499	16418	17627	0	946
Scaffold_10746	NC_022771	67.994	1959	591	11	2565	4519	12474	14400	0	690
Scaffold_10746	NC_022771	75.766	718	147	4	8531	9223	18626	19341	6.1e-145	518
Scaffold_10746	NC_022771	75.082	610	145	4	1561	2164	11499	12107	3.38e-110	403
Scaffold_10746	NC_022771	79.558	362	74	0	9839	10200	19950	20311	3.17e-85	320
Scaffold_10746	NC_022771	69.779	589	158	11	5329	5906	15269	15848	1.54e-57	228
Scaffold_10746	NC_022771	66.805	482	142	11	7719	8191	17844	18316	2.44e-23	114
Scaffold_10746	NC_021856	67.397	1963	596	10	2565	4519	14970	16896	0	650
Scaffold_10746	NC_021856	74.184	980	221	11	6526	7499	19149	20102	1.53e-171	607
Scaffold_10746	NC_021856	76.316	722	136	5	8531	9223	21101	21816	5.34e-152	542
Scaffold_10746	NC_021856	79.282	362	75	0	9839	10200	22425	22786	1.35e-83	315
Scaffold_10746	NC_021856	72.047	508	135	5	1662	2164	14098	14603	2.6e-67	260
Scaffold_10746	NC_021856	69.949	589	157	11	5329	5906	17763	18342	3.62e-59	233
Scaffold_10746	NC_021856	92.157	102	8	0	1561	1662	12459	12560	1.18e-33	149
Scaffold_10746	NC_021856	67.149	484	137	13	7719	8191	20319	20791	2e-24	118
Scaffold_10746	NC_021856	71.579	95	27	0	6325	6419	18948	19042	0.000853	50
Scaffold_10746	AB091475	68.896	1495	448	8	2565	4052	1574	90	2.13e-163	580
Scaffold_10746	AB091475	72.047	508	135	5	1662	2164	2446	1941	2.6e-67	260
Scaffold_10746	KM051843	67.592	1225	362	17	3093	4302	155982	154778	1.64e-101	374
Scaffold_10746	KM051843	77.064	218	50	0	7182	7399	146326	146109	1.26e-39	168
Scaffold_10746	KM051843	67	300	99	0	6549	6848	148092	147793	2.29e-17	95.1
Scaffold_10746	KM051843	65.862	290	89	4	9828	10113	142550	142267	3.18e-09	68
Scaffold_10746	KM051843	66.044	321	97	7	1913	2227	157150	156836	3.18e-09	68
Scaffold_10746	KM051843	86.047	43	6	0	2406	2448	156648	156606	0.000244	51.8
Scaffold_10746	NC_020081	68.566	1018	300	12	3068	4076	145408	144402	1.26e-96	358
Scaffold_10746	NC_020081	66.136	942	290	17	6549	7476	137907	136981	4.13e-52	210
Scaffold_10746	NC_020081	67.754	276	82	3	9840	10113	133421	133151	9.72e-16	89.7
Scaffold_10746	NC_020081	71.515	165	45	2	1885	2048	146660	146497	1.76e-12	78.8
Scaffold_10746	NC_020081	81.818	44	8	0	2405	2448	146131	146088	0.036	44.6
Scaffold_10746	NC_024137	68.251	463	137	6	5440	5898	16015	16471	2.78e-35	154
Scaffold_10746	NC_024137	73.864	88	23	0	6564	6651	17432	17519	2.01e-05	55.4
Scaffold_10746	NC_022763	69.655	290	84	2	9890	10177	21031	21318	1.65e-25	122
Scaffold_10746	6.66667e+06	69.31	290	85	2	9890	10177	7273	6986	6.99e-24	116
Scaffold_10746	JN797798	73.43	207	50	5	7196	7400	10256	10053	3.62e-21	107
Scaffold_10746	JN797798	68.644	236	74	0	9881	10116	7115	6880	7.98e-17	93.3
Scaffold_10746	NC_020873	66.381	467	139	10	5440	5898	14539	14083	1.26e-20	105
Scaffold_10746	NC_020873	76.136	88	21	0	6564	6651	13090	13003	3.87e-08	64.4
Scaffold_10746	NC_022769	69.369	222	68	0	9956	10177	20544	20765	2.29e-17	95.1
Scaffold_10746	NC_022769	62.944	394	137	3	5431	5818	14763	15153	0.003	48.2
Scaffold_10746	NC_022769	81.481	54	8	2	6322	6374	16618	16670	0.01	46.4
Scaffold_10746	KJ489402	68.919	222	69	0	9956	10177	18321	18542	9.72e-16	89.7
Scaffold_10746	KJ489402	68.28	186	57	2	7209	7393	15231	15415	1.35e-07	62.6
Scaffold_10746	NC_001884	72.222	162	39	4	3529	3687	97227	97069	6.14e-12	77
Scaffold_10746	KC295538	67.556	225	73	0	6746	6970	6168	6392	6.14e-12	77
Scaffold_10746	NC_023581	68.844	199	58	2	6705	6901	38139	37943	2.14e-11	75.2
Scaffold_10746	KF301602	66.165	266	84	2	6704	6966	23174	23436	2.61e-10	71.6
Scaffold_10746	NC_019515	65.748	254	84	1	6720	6970	78375	78628	3.87e-08	64.4
Scaffold_10746	JN641803	70.068	147	38	2	6888	7031	198177	198034	3.87e-08	64.4
Scaffold_10746	NC_023561	67.411	224	67	4	6705	6925	147847	148067	1.35e-07	62.6
Scaffold_10746	NC_016770	79.412	68	14	0	6885	6952	3566	3633	4.72e-07	60.8
Scaffold_10746	NC_014662	65.926	270	86	4	6705	6971	139805	140071	4.72e-07	60.8
Scaffold_10746	NC_011222	79.412	68	14	0	6885	6952	20228	20161	4.72e-07	60.8
Scaffold_10746	NC_004166	70.732	123	36	0	1916	2038	34918	34796	4.72e-07	60.8
Scaffold_10746	JX483881	66.807	238	73	4	6785	7019	62259	62025	4.72e-07	60.8
Scaffold_10746	NC_005066	78.571	70	15	0	6773	6842	137098	137167	1.65e-06	59
Scaffold_10746	NC_019401	65.233	279	93	3	6711	6987	134184	133908	5.75e-06	57.2
Scaffold_10746	NC_018856	66.832	202	63	2	5614	5813	144611	144810	5.75e-06	57.2
Scaffold_10746	NC_011421	84.314	51	8	0	2404	2454	113924	113874	5.75e-06	57.2
Scaffold_10746	NC_024205	69.014	142	40	2	5614	5753	17148	17287	7e-05	53.6
Scaffold_10746	NC_024139	64.875	279	92	4	6719	6992	46277	46554	0.000853	50
Scaffold_10746	AY587007	64.875	279	92	4	6719	6992	47122	47399	0.000853	50
Scaffold_10746	NC_019544	78.571	56	12	0	6798	6853	45984	45929	0.003	48.2
Scaffold_10746	KF381361	65.766	222	68	4	6756	6973	176457	176674	0.003	48.2
Scaffold_10746	NC_019398	66.176	204	62	4	6762	6961	39839	39639	0.01	46.4
Scaffold_10746	NC_010105	66.871	163	52	2	6810	6971	143648	143809	0.036	44.6
Scaffold_1075	NC_023719	85.714	42	2	2	495	535	190450	190412	0.009	44.6
Scaffold_1075	NC_020877	82.222	45	6	1	1686	1730	101945	101903	0.032	42.8
Scaffold_1075	NC_019511	82.222	45	6	1	1686	1730	17622	17664	0.032	42.8
Scaffold_1075	FR823450	75.556	90	11	7	1192	1275	38408	38492	0.032	42.8
Scaffold_10750	NC_023719	88.235	34	3	1	260	292	37372	37339	0.012	41
Scaffold_10756	NC_001884	84.096	415	53	6	676	1078	134416	134003	7.73e-121	435
Scaffold_10757	NC_009760	67.133	143	47	0	800	942	157581	157439	0.001	46.4
Scaffold_10762	NC_015290	87.097	31	4	0	14	44	102649	102619	0.035	39.2
Scaffold_10764	AP013444	86.486	37	5	0	111	147	30528	30564	0.001	44.6
Scaffold_10764	NC_010363	87.097	31	4	0	114	144	691	721	0.041	39.2
Scaffold_10764	NC_003291	86.111	36	4	1	121	155	28740	28775	0.041	39.2
Scaffold_1077	AP013385	90.323	31	3	0	625	655	31591	31561	0.01	42.8
Scaffold_1077	AP013553	90	30	3	0	625	654	4634	4605	0.033	41
Scaffold_10773	NC_022914	88.387	310	36	0	1	310	1821	1512	4e-110	398
Scaffold_10773	NC_019915	75.484	310	76	0	1	310	17022	16713	7.74e-56	217
Scaffold_10773	JX193904	73.529	68	12	2	187	251	1153	1089	0.043	39.2
Scaffold_10774	EU418428	83.333	42	4	1	1403	1444	114162	114200	0.026	42.8
Scaffold_10774	AY176327	83.333	42	4	1	1403	1444	107105	107143	0.026	42.8
Scaffold_10774	AP011616	87.879	33	4	0	1726	1758	44267	44299	0.026	42.8
Scaffold_10776	6.66667e+06	92.857	28	2	0	218	245	31670	31697	0.019	42.8
Scaffold_10778	NC_023719	87.879	33	4	0	1536	1568	145104	145136	0.029	42.8
Scaffold_10778	NC_021802	86.111	36	5	0	1198	1233	14477	14512	0.029	42.8
Scaffold_10778	AP013520	86.842	38	4	1	1559	1596	25228	25192	0.029	42.8
Scaffold_10778	1.13303e+06	84.211	38	6	0	1175	1212	4923	4886	0.029	42.8
Scaffold_10779	GU229986	80.952	42	8	0	211	252	11303	11344	0.035	41
Scaffold_10783	NC_018856	85.714	49	5	1	95	141	6813	6765	1.32e-05	55.4
Scaffold_10783	NC_024205	85.106	47	5	1	95	139	32810	32764	0.000161	51.8
Scaffold_10783	NC_018452	84.444	45	5	1	99	141	8304	8260	0.002	48.2
Scaffold_10783	NC_012743	84.444	45	5	1	99	141	7246	7202	0.002	48.2
Scaffold_10783	NC_020079	82.692	52	7	2	4718	4767	139903	139954	0.007	46.4
Scaffold_10784	NC_022769	90.625	32	3	0	835	866	134456	134425	0.007	44.6
Scaffold_10784	KJ489402	90.625	32	3	0	835	866	132597	132566	0.007	44.6
Scaffold_10785	AP013542	87.5	32	4	0	187	218	4358	4327	0.009	41
Scaffold_10788	AP013532	88.235	34	4	0	799	832	36535	36502	0.006	44.6
Scaffold_10789	NC_017974	93.103	29	2	0	1970	1998	100394	100366	0.009	44.6
Scaffold_10791	NC_019399	85.714	42	4	2	66	105	69327	69286	0.011	42.8
Scaffold_10793	AP013380	82.692	52	4	3	159	210	15772	15818	0.000653	44.6
Scaffold_10793	JX409895	82.979	47	5	3	8	52	36127	36172	0.028	39.2
Scaffold_10793	JX409894	82.979	47	5	3	8	52	24280	24325	0.028	39.2
Scaffold_10794	NC_019507	88.235	34	3	1	127	159	142599	142566	0.04	41
Scaffold_10794	NC_016562	92.593	27	2	0	851	877	127063	127089	0.04	41
Scaffold_10794	KF148616	92.593	27	2	0	851	877	127299	127325	0.04	41
Scaffold_10794	FR823450	92.593	27	2	0	851	877	1621	1595	0.04	41
Scaffold_10794	FN667789	88.235	34	3	1	127	159	138136	138169	0.04	41
Scaffold_10794	FN667788	92.593	27	2	0	851	877	154388	154362	0.04	41
Scaffold_10795	NC_023599	82.609	46	7	1	1466	1510	26817	26862	0.007	44.6
Scaffold_10795	NC_018085	82.609	46	7	1	1466	1510	27280	27325	0.007	44.6
Scaffold_10795	HE614282	82.609	46	7	1	1466	1510	28667	28712	0.007	44.6
Scaffold_10795	NC_022769	83.333	42	4	1	1340	1381	30722	30684	0.023	42.8
Scaffold_10795	NC_022763	83.333	42	4	1	1340	1381	31762	31724	0.023	42.8
Scaffold_10795	KJ489402	83.333	42	4	1	1340	1381	28344	28306	0.023	42.8
Scaffold_10795	6.66667e+06	83.333	42	4	1	1340	1381	159793	159831	0.023	42.8
Scaffold_10798	NC_020873	89.655	29	3	0	107	135	110894	110866	0.046	39.2
Scaffold_10801	AP013545	77.966	59	5	3	189	240	1947	1890	0.003	42.8
Scaffold_10801	6.66667e+06	83.721	43	6	1	2	44	5935	5894	0.003	42.8
Scaffold_10804	AP013478	93.103	29	2	0	1892	1920	18237	18265	0.01	44.6
Scaffold_10807	NC_024137	88.571	35	4	0	412	446	152	118	0.000503	46.4
Scaffold_10811	NC_007052	70.213	141	20	7	47	173	22184	22052	1.91e-06	53.6
Scaffold_10811	NC_017969	93.75	32	2	0	193	224	19841	19872	2.32e-05	50
Scaffold_10811	NC_024139	90.625	32	3	0	193	224	20128	20159	0.001	44.6
Scaffold_10811	NC_015269	90.625	32	3	0	193	224	19677	19708	0.001	44.6
Scaffold_10811	KF831354	66.216	148	23	5	47	173	4709	4850	0.001	44.6
Scaffold_10811	AY587007	90.625	32	3	0	193	224	19678	19709	0.001	44.6
Scaffold_10811	NC_022767	90.323	31	2	1	49	79	2537	2566	0.042	39.2
Scaffold_10811	NC_021852	82	50	6	3	32	79	26835	26787	0.042	39.2
Scaffold_10811	NC_021773	65.541	148	24	5	47	173	5158	5017	0.042	39.2
Scaffold_10811	NC_013195	65.541	148	24	5	47	173	38274	38133	0.042	39.2
Scaffold_10811	NC_008617	65.541	148	24	5	47	173	38506	38365	0.042	39.2
Scaffold_10814	NC_021326	85.366	41	4	1	173	213	43087	43049	0.001	44.6
Scaffold_10814	NC_021323	85.366	41	4	1	173	213	3697	3735	0.001	44.6
Scaffold_10814	NC_008617	85.366	41	4	1	173	213	3401	3439	0.001	44.6
Scaffold_10814	NC_024205	90.625	32	0	1	6	34	148635	148604	0.004	42.8
Scaffold_10814	NC_018856	90.625	32	0	1	6	34	123417	123386	0.004	42.8
Scaffold_10816	NC_016562	96.154	26	1	0	668	693	124850	124875	0.009	42.8
Scaffold_10816	NC_015464	96.154	26	1	0	668	693	36045	36070	0.009	42.8
Scaffold_10816	KF148616	96.154	26	1	0	668	693	125086	125111	0.009	42.8
Scaffold_10816	FR823450	96.154	26	1	0	668	693	3834	3809	0.009	42.8
Scaffold_10816	NC_007581	84.615	39	5	1	119	156	3882	3844	0.03	41
Scaffold_10816	NC_007581	84.615	39	5	1	119	156	16319	16281	0.03	41
Scaffold_10816	NC_007581	84.615	39	5	1	119	156	160307	160345	0.03	41
Scaffold_10817	6.66667e+06	69.139	337	98	3	1711	2041	94418	94754	8.44e-29	131
Scaffold_10817	6.66667e+06	68.249	337	101	3	1711	2041	97607	97943	5.33e-25	118
Scaffold_10817	NC_004688	69.424	278	82	1	1711	1985	99212	99489	1.86e-24	116
Scaffold_10817	NC_022067	72.189	169	43	4	2244	2410	95981	96147	4.67e-13	78.8
Scaffold_10817	6.66667e+06	72.189	169	43	4	2244	2410	100441	100607	4.67e-13	78.8
Scaffold_10817	6.66667e+06	72.189	169	43	4	2244	2410	95476	95642	4.67e-13	78.8
Scaffold_10817	NC_023690	71.598	169	44	4	2244	2410	97435	97601	5.69e-12	75.2
Scaffold_10817	NC_021856	69.767	129	36	2	1920	2048	134296	134171	6.5e-05	51.8
Scaffold_10819	JX486088	84.615	39	3	1	321	359	68470	68435	0.022	42.8
Scaffold_10822	NC_024357	75	56	14	0	112	167	29809	29754	0.039	39.2
Scaffold_1083	NC_007581	83.721	43	6	1	2427	2469	70938	70897	0.031	42.8
Scaffold_1083	JX181824	81.818	44	5	1	2424	2467	101133	101093	0.031	42.8
Scaffold_10832	NC_023719	79.167	48	9	1	64	111	46852	46898	0.029	39.2
Scaffold_10835	AP013521	93.75	32	1	1	3929	3959	3913	3944	0.005	46.4
Scaffold_10837	NC_019910	87.5	32	4	0	162	193	80633	80602	0.009	41
Scaffold_10837	NC_013693	87.5	32	4	0	162	193	47675	47706	0.009	41
Scaffold_10837	KJ716335	87.5	32	4	0	162	193	19824	19855	0.009	41
Scaffold_10837	KC595517	88.235	34	3	1	105	138	29954	29986	0.009	41
Scaffold_10837	NC_019932	92.308	26	2	0	156	181	15481	15506	0.032	39.2
Scaffold_10838	JN849462	96	25	1	0	183	207	12639	12663	0.01	41
Scaffold_10838	AP013475	92.593	27	2	0	181	207	22641	22667	0.01	41
Scaffold_10839	NC_023719	68.28	599	172	8	1051	1634	188450	189045	2.77e-51	205
Scaffold_10839	NC_021794	87.879	33	4	0	510	542	46733	46765	0.02	42.8
Scaffold_1084	NC_015251	88.571	35	4	0	1477	1511	22363	22397	0.002	46.4
Scaffold_1084	NC_023719	81.818	44	8	0	1477	1520	288100	288057	0.008	44.6
Scaffold_10841	NC_017968	93.333	30	1	1	172	200	6319	6348	0.008	42.8
Scaffold_10841	NC_014460	93.333	30	1	1	172	200	27952	27923	0.008	42.8
Scaffold_10841	NC_011614	93.333	30	1	1	172	200	2879	2850	0.008	42.8
Scaffold_10842	AP013476	92.593	27	2	0	660	686	31876	31902	0.033	41
Scaffold_10844	GQ478085	68.07	285	85	2	532	813	21740	21459	7.22e-20	100
Scaffold_10844	GQ478082	68.07	285	85	2	532	813	23908	23627	7.22e-20	100
Scaffold_10844	NC_022770	77.419	62	7	3	1262	1319	6605	6547	0.017	42.8
Scaffold_10845	NC_018284	75.806	62	14	1	3	63	17665	17604	0.011	41
Scaffold_10845	NC_018281	75.806	62	14	1	3	63	18067	18006	0.011	41
Scaffold_10845	NC_008722	75.806	62	14	1	3	63	18121	18060	0.011	41
Scaffold_10849	NC_007021	88.235	34	1	1	196	226	17673	17706	0.007	42.8
Scaffold_1085	NC_024144	82.353	51	9	0	4548	4598	19123	19173	0.000148	51.8
Scaffold_1085	AP013459	79.31	58	8	2	3082	3139	7409	7356	0.006	46.4
Scaffold_10850	NC_021773	96	25	1	0	354	378	28590	28614	0.019	41
Scaffold_10850	NC_012784	96	25	1	0	354	378	19798	19822	0.019	41
Scaffold_10850	NC_008689	96	25	1	0	354	378	18481	18505	0.019	41
Scaffold_1086	NC_021802	79.365	63	11	2	22943	23004	23425	23364	0.009	48.2
Scaffold_1086	NC_024387	90.909	33	3	0	3876	3908	24818	24786	0.031	46.4
Scaffold_1086	NC_024386	88.571	35	4	0	28570	28604	25669	25703	0.031	46.4
Scaffold_1086	NC_021539	90.909	33	3	0	3876	3908	20862	20830	0.031	46.4
Scaffold_1086	NC_009812	90.909	33	3	0	3876	3908	25319	25287	0.031	46.4
Scaffold_1086	NC_008723	90.909	33	3	0	11084	11116	16139	16171	0.031	46.4
Scaffold_1086	NC_003291	90.909	33	3	0	3876	3908	20585	20553	0.031	46.4
Scaffold_1086	KF296717	79.032	62	11	2	22844	22904	1552	1492	0.031	46.4
Scaffold_1086	AP013453	93.333	30	2	0	8265	8294	33954	33925	0.031	46.4
Scaffold_10860	KJ716335	96	25	1	0	439	463	146441	146465	0.024	41
Scaffold_10861	NC_021316	92.593	27	2	0	450	476	34561	34535	0.029	41
Scaffold_10866	JX181825	96	25	1	0	218	242	38169	38145	0.016	41
Scaffold_1087	NC_007021	84.615	39	6	0	925	963	31728	31766	0.017	44.6
Scaffold_10870	NC_018088	83.721	43	6	1	195	237	21797	21756	0.005	42.8
Scaffold_10871	NC_020855	78.431	51	9	1	797	847	35268	35220	0.037	41
Scaffold_10871	NC_008721	84.091	44	5	2	24	66	4922	4964	0.037	41
Scaffold_10871	NC_001447	85.714	35	5	0	366	400	8426	8392	0.037	41
Scaffold_10873	NC_021336	80.702	57	8	2	562	618	7407	7460	0.000271	48.2
Scaffold_10873	NC_007917	83.333	42	6	1	575	616	44552	44512	0.04	41
Scaffold_10880	NC_007581	90.323	31	3	0	104	134	127663	127633	0.019	42.8
Scaffold_10880	HQ317385	86.111	36	5	0	461	496	131464	131499	0.019	42.8
Scaffold_10881	NC_015269	79.167	48	7	1	183	230	76595	76639	0.022	41
Scaffold_10882	NC_015269	79.167	48	7	1	181	228	76595	76639	0.018	41
Scaffold_10883	NC_015269	89.655	29	3	0	28	56	76595	76623	0.045	39.2
Scaffold_10888	GU229986	93.548	31	2	0	232	262	56111	56141	0.00039	48.2
Scaffold_10888	NC_021802	88.889	36	3	1	30	65	31557	31591	0.005	44.6
Scaffold_10888	NC_005260	90.323	31	3	0	290	320	186115	186085	0.017	42.8
Scaffold_10889	AP013461	92.593	27	2	0	114	140	31821	31795	0.023	41
Scaffold_1089	NC_015464	91.176	34	2	1	621	654	115125	115157	0.003	44.6
Scaffold_1089	AP013445	79.167	48	10	0	122	169	23971	24018	0.011	42.8
Scaffold_1089	NC_023559	76.923	52	12	0	590	641	45283	45334	0.037	41
Scaffold_1089	NC_014457	96	25	1	0	616	640	37906	37882	0.037	41
Scaffold_1089	FR823450	88.235	34	3	1	621	654	59764	59732	0.037	41
Scaffold_10890	NC_007045	80.702	57	11	0	215	271	6148	6092	1.69e-06	53.6
Scaffold_10890	NC_020863	92.593	27	2	0	26	52	69828	69802	0.011	41
Scaffold_10890	NC_015464	76.471	51	12	0	25	75	69771	69721	0.037	39.2
Scaffold_10891	NC_023719	87.097	31	4	0	27	57	213881	213851	0.032	39.2
Scaffold_10896	JN797798	71.127	142	36	3	660	800	45650	45787	2.61e-08	62.6
Scaffold_10896	NC_024137	72.632	95	26	0	646	740	141706	141612	3.87e-06	55.4
Scaffold_10896	AP013443	79.245	53	8	1	729	778	14064	14116	0.007	44.6
Scaffold_10897	NC_007581	84.615	39	6	0	1047	1085	84093	84131	0.005	44.6
Scaffold_10898	AP013383	80.435	46	8	1	219	263	13855	13900	0.04	39.2
Scaffold_10899	NC_014457	92.593	27	2	0	88	114	51118	51144	0.023	41
Scaffold_10899	NC_014457	92.593	27	2	0	88	114	53942	53968	0.023	41
Scaffold_109	NC_015263	86.047	43	3	1	6782	6824	19394	19433	0.000873	50
Scaffold_109	NC_022769	80	60	9	2	6160	6218	94835	94892	0.003	48.2
Scaffold_109	NC_023574	83.721	43	4	1	6782	6824	24638	24677	0.037	44.6
Scaffold_109	NC_023007	88.235	34	4	0	5728	5761	74266	74299	0.037	44.6
Scaffold_109	KJ489402	78.333	60	10	2	6160	6218	93397	93454	0.037	44.6
Scaffold_109	AP013562	88.889	36	3	1	9647	9682	22716	22682	0.037	44.6
Scaffold_1090	HQ317290	93.103	58	3	1	39352	39409	161245	161301	2.2e-13	84.2
Scaffold_1090	NC_019445	89.474	57	6	0	39353	39409	14489	14433	3.27e-11	77
Scaffold_1090	NC_013085	89.474	57	6	0	39353	39409	32078	32022	3.27e-11	77
Scaffold_1090	NC_013085	82.143	56	10	0	39353	39408	176448	176393	3.06e-05	57.2
Scaffold_1090	NC_007804	89.474	57	6	0	39353	39409	2922	2866	3.27e-11	77
Scaffold_1090	JQ691610	89.474	57	6	0	39353	39409	2883	2827	3.27e-11	77
Scaffold_1090	NC_021536	89.655	58	5	1	39352	39409	147059	147115	1.14e-10	75.2
Scaffold_1090	NC_021536	79.31	58	12	0	39352	39409	148137	148194	0.001	51.8
Scaffold_1090	NC_015282	89.655	58	5	1	39352	39409	160622	160678	1.14e-10	75.2
Scaffold_1090	NC_015282	80.357	56	11	0	39353	39408	19416	19471	0.001	51.8
Scaffold_1090	NC_008296	86.885	61	8	0	39352	39412	162268	162328	1.14e-10	75.2
Scaffold_1090	NC_008296	80.357	56	11	0	39353	39408	20008	20063	0.001	51.8
Scaffold_1090	NC_023006	81.944	72	13	0	39348	39419	21137	21066	1.39e-09	71.6
Scaffold_1090	NC_015279	86.207	58	8	0	39352	39409	140960	141017	4.85e-09	69.8
Scaffold_1090	HM246724	85.246	61	9	0	39352	39412	13520	13460	4.85e-09	69.8
Scaffold_1090	FN667789	85.246	61	9	0	39352	39412	112373	112433	4.85e-09	69.8
Scaffold_1090	FN667788	85.246	61	9	0	39352	39412	111952	112012	4.85e-09	69.8
Scaffold_1090	NC_015287	85.965	57	8	0	39353	39409	216582	216638	1.69e-08	68
Scaffold_1090	NC_021072	86.207	58	7	1	39352	39409	71477	71421	5.9e-08	66.2
Scaffold_1090	NC_021071	86.207	58	7	1	39352	39409	71683	71627	5.9e-08	66.2
Scaffold_1090	NC_019443	86.207	58	7	1	39352	39409	159603	159659	5.9e-08	66.2
Scaffold_1090	NC_015285	83.607	61	10	0	39352	39412	158988	159048	5.9e-08	66.2
Scaffold_1090	HQ317385	83.607	61	10	0	39352	39412	153731	153791	5.9e-08	66.2
Scaffold_1090	HQ317385	80.303	66	13	0	39351	39416	19101	19166	2.51e-06	60.8
Scaffold_1090	NC_020875	83.099	71	9	3	39352	39421	150857	150925	2.06e-07	64.4
Scaffold_1090	NC_006820	83.871	62	9	1	39348	39408	118245	118306	2.06e-07	64.4
Scaffold_1090	NC_019516	84.211	57	9	0	39352	39408	17054	17110	7.19e-07	62.6
Scaffold_1090	NC_019485	84.211	57	9	0	39353	39409	55635	55691	7.19e-07	62.6
Scaffold_1090	NC_015289	88.235	51	5	1	39352	39402	161705	161754	7.19e-07	62.6
Scaffold_1090	NC_015289	82.143	56	10	0	39353	39408	19476	19531	3.06e-05	57.2
Scaffold_1090	NC_023719	82.759	58	10	0	39352	39409	403947	404004	2.51e-06	60.8
Scaffold_1090	NC_023584	81.967	61	11	0	39352	39412	154520	154580	2.51e-06	60.8
Scaffold_1090	NC_021530	81.967	61	11	0	39352	39412	155055	155115	2.51e-06	60.8
Scaffold_1090	NC_018861	80.303	66	13	0	39342	39407	88784	88719	2.51e-06	60.8
Scaffold_1090	NC_016562	80.303	66	13	0	39342	39407	38441	38376	2.51e-06	60.8
Scaffold_1090	KF148616	80.303	66	13	0	39342	39407	38675	38610	2.51e-06	60.8
Scaffold_1090	FR823450	80.303	66	13	0	39342	39407	90034	90099	2.51e-06	60.8
Scaffold_1090	NC_023579	83.051	59	9	1	39350	39408	41257	41314	8.76e-06	59
Scaffold_1090	JX306041	81.667	60	11	0	39349	39408	64323	64264	8.76e-06	59
Scaffold_1090	NC_015938	82.456	57	9	1	39353	39409	2463	2518	0.000107	55.4
Scaffold_1090	NC_014660	80	60	12	0	39349	39408	80484	80425	0.000107	55.4
Scaffold_1090	HE983844	79.104	67	13	1	39344	39409	711	777	0.000107	55.4
Scaffold_1090	NC_016571	80.328	61	11	1	39349	39409	16193	16134	0.000373	53.6
Scaffold_1090	AP011616	80.328	61	11	1	39348	39408	52070	52129	0.000373	53.6
Scaffold_1090	NC_023587	80.357	56	11	0	39353	39408	19406	19461	0.001	51.8
Scaffold_1090	NC_021529	81.034	58	10	1	39353	39409	234023	233966	0.001	51.8
Scaffold_1090	NC_009816	78.462	65	13	1	39348	39412	50607	50544	0.001	51.8
Scaffold_1090	NC_023561	74.667	75	19	0	39343	39417	75762	75688	0.005	50
Scaffold_1090	NC_019540	78.947	57	12	0	39353	39409	44201	44257	0.005	50
Scaffold_1090	NC_019529	78.947	57	12	0	39353	39409	45243	45299	0.005	50
Scaffold_1090	NC_019521	78.333	60	13	0	39349	39408	1276	1335	0.005	50
Scaffold_1090	NC_015281	80.702	57	10	1	39352	39408	164015	164070	0.005	50
Scaffold_1090	NC_005135	78.333	60	13	0	39349	39408	65452	65393	0.005	50
Scaffold_1090	NC_023568	79.31	58	11	1	39353	39409	117502	117445	0.016	48.2
Scaffold_1090	NC_021782	78.571	56	12	0	39353	39408	63034	63089	0.016	48.2
Scaffold_1090	NC_020873	93.548	31	2	0	27556	27586	27565	27535	0.016	48.2
Scaffold_1090	NC_019909	78.571	56	12	0	39353	39408	74971	74916	0.016	48.2
Scaffold_1090	NC_019401	79.31	58	11	1	39351	39408	310993	311049	0.016	48.2
Scaffold_1090	NC_015251	78.571	56	12	0	39353	39408	112210	112265	0.016	48.2
Scaffold_1090	NC_011421	79.452	73	8	5	39352	39421	32603	32671	0.016	48.2
Scaffold_1090	NC_007603	78.571	56	12	0	39353	39408	4900	4955	0.016	48.2
Scaffold_1090	NC_007061	93.548	31	2	0	40596	40626	30384	30354	0.016	48.2
Scaffold_1090	NC_007051	87.5	40	3	1	30659	30696	6764	6725	0.016	48.2
Scaffold_1090	NC_006565	85.366	41	6	0	39353	39393	54059	54019	0.016	48.2
Scaffold_10900	NC_023863	90.323	31	3	0	108	138	56000	56030	0.008	42.8
Scaffold_10901	NC_019541	82.927	41	5	1	25	63	11360	11400	0.025	41
Scaffold_10902	NC_019488	79.167	48	9	1	100	146	11656	11703	0.036	39.2
Scaffold_10906	NC_015568	83.333	48	7	1	608	654	19294	19247	0.000257	48.2
Scaffold_10906	AP013432	75.342	73	16	2	748	819	6359	6288	0.003	44.6
Scaffold_10908	NC_023719	67.097	155	42	2	658	809	182365	182513	7.29e-05	50
Scaffold_1091	KC295538	82.192	73	12	1	4822	4894	207915	207844	1.49e-09	69.8
Scaffold_1091	NC_005260	78.125	64	14	0	4832	4895	107846	107783	0.000115	53.6
Scaffold_1091	JX128257	81.818	55	9	1	4835	4888	75668	75614	0.0004	51.8
Scaffold_1091	JN797798	77.941	68	14	1	4823	4889	150030	149963	0.0004	51.8
Scaffold_1091	NC_015464	93.939	33	1	1	12641	12673	26174	26205	0.005	48.2
Scaffold_1091	NC_006820	78.571	70	12	3	4833	4900	119617	119685	0.005	48.2
Scaffold_1091	HQ317385	81.633	49	9	0	4835	4883	19278	19326	0.005	48.2
Scaffold_1091	NC_018861	93.75	32	1	1	12642	12673	29023	29053	0.017	46.4
Scaffold_1091	NC_016562	93.75	32	1	1	12642	12673	114979	115009	0.017	46.4
Scaffold_1091	KF148616	93.75	32	1	1	12642	12673	115215	115245	0.017	46.4
Scaffold_1091	FR823450	93.75	32	1	1	12642	12673	13705	13675	0.017	46.4
Scaffold_1092	NC_008689	69.466	393	104	8	5292	5679	40184	40565	1.15e-32	147
Scaffold_1092	NC_022769	77.612	67	15	0	20413	20479	122505	122439	0.000194	53.6
Scaffold_1092	KJ489402	77.612	67	15	0	20413	20479	120302	120236	0.000194	53.6
Scaffold_1092	NC_023550	93.75	32	2	0	20799	20830	9111	9080	0.002	50
Scaffold_1092	6.66667e+06	82	50	9	0	3879	3928	106623	106672	0.002	50
Scaffold_1092	NC_015254	89.474	38	3	1	7245	7282	11941	11977	0.008	48.2
Scaffold_10920	AP013427	86.486	37	5	0	490	526	12086	12122	0.008	44.6
Scaffold_10920	AP013426	86.486	37	5	0	490	526	10749	10785	0.008	44.6
Scaffold_10920	NC_020845	90.323	31	3	0	1483	1513	100778	100748	0.028	42.8
Scaffold_10920	NC_009817	90.323	31	3	0	2191	2221	29270	29300	0.028	42.8
Scaffold_10923	AP011616	80	55	10	1	740	794	114040	113987	0.001	46.4
Scaffold_10923	NC_019726	92.857	28	2	0	475	502	80847	80874	0.015	42.8
Scaffold_10923	NC_019448	92.857	28	2	0	475	502	6131	6104	0.015	42.8
Scaffold_10923	EU418428	92.857	28	2	0	475	502	7981	7954	0.015	42.8
Scaffold_10923	EU418428	92.857	28	2	0	475	502	145068	145041	0.015	42.8
Scaffold_10923	AY176327	92.857	28	2	0	475	502	934	907	0.015	42.8
Scaffold_10924	NC_019515	100	22	0	0	89	110	89469	89490	0.031	41
Scaffold_10925	NC_019927	78.462	65	14	0	1270	1334	6089	6025	3.15e-06	55.4
Scaffold_10925	NC_011976	75	68	16	1	1267	1334	20206	20140	0.02	42.8
Scaffold_10926	NC_020201	83.784	37	6	0	89	125	31569	31533	0.044	41
Scaffold_10926	NC_016656	92.593	27	2	0	980	1006	38538	38512	0.044	41
Scaffold_10927	NC_018861	74.627	67	11	2	845	905	118487	118421	0.043	41
Scaffold_10927	NC_016562	74.627	67	11	2	845	905	71271	71205	0.043	41
Scaffold_10927	KF148616	74.627	67	11	2	845	905	71504	71438	0.043	41
Scaffold_10927	FR823450	74.627	67	11	2	845	905	56830	56896	0.043	41
Scaffold_1093	NC_020875	87.5	40	3	2	1282	1321	24134	24171	0.022	42.8
Scaffold_10930	NC_004166	73.295	176	47	0	1	176	37868	38043	1.06e-21	105
Scaffold_10930	NC_023612	69.799	149	45	0	23	171	33314	33462	9.26e-10	66.2
Scaffold_10932	NC_021853	81.395	43	8	0	1391	1433	18370	18328	0.023	42.8
Scaffold_10932	NC_021852	81.395	43	8	0	1391	1433	17437	17395	0.023	42.8
Scaffold_10932	NC_008363	81.395	43	8	0	1391	1433	16104	16062	0.023	42.8
Scaffold_10932	KC182550	81.395	43	8	0	1391	1433	16675	16633	0.023	42.8
Scaffold_10932	KC182543	81.395	43	8	0	1391	1433	18372	18330	0.023	42.8
Scaffold_10932	AP013454	79.661	59	9	3	1787	1843	21317	21260	0.023	42.8
Scaffold_10934	NC_024125	82.5	40	7	0	100	139	158434	158395	0.009	41
Scaffold_10935	NC_024125	82.5	40	7	0	100	139	158434	158395	0.009	41
Scaffold_10935	KC438283	96	25	1	0	9	33	54449	54425	0.009	41
Scaffold_10936	NC_024205	83.333	36	6	0	5	40	145235	145200	0.031	39.2
Scaffold_10939	AB609718	89.655	29	3	0	151	179	46207	46235	0.027	39.2
Scaffold_10940	NC_006557	68.161	647	200	4	703	1346	5906	6549	9.69e-58	226
Scaffold_10940	NC_006557	70.466	193	57	0	1670	1862	6870	7062	5.03e-17	91.5
Scaffold_10940	NC_016562	87.879	33	4	0	688	720	33823	33791	0.023	42.8
Scaffold_10940	NC_015464	87.879	33	4	0	688	720	81443	81411	0.023	42.8
Scaffold_10940	NC_003793	86.111	36	5	0	171	206	4278	4313	0.023	42.8
Scaffold_10940	KF148616	87.879	33	4	0	688	720	34057	34025	0.023	42.8
Scaffold_10940	FR823450	87.879	33	4	0	688	720	94652	94684	0.023	42.8
Scaffold_10941	NC_023007	83.333	42	3	2	103	141	98381	98421	0.026	39.2
Scaffold_10945	NC_001825	85.714	42	0	2	525	560	9644	9603	0.001	46.4
Scaffold_10946	AP013379	86.486	37	4	1	184	220	14076	14111	0.01	41
Scaffold_10948	NC_007581	82	50	3	3	543	588	52888	52935	0.013	42.8
Scaffold_1095	NC_007050	85	40	6	0	71	110	32462	32423	0.001	46.4
Scaffold_10955	AP013553	86.111	36	5	0	987	1022	11453	11488	0.015	42.8
Scaffold_10957	NC_020851	67.027	185	55	5	122	303	34405	34224	0.007	42.8
Scaffold_10961	NC_022914	77.676	327	64	3	1	327	7526	7843	3.26e-67	255
Scaffold_10961	NC_007051	88.372	43	4	1	285	327	7670	7711	7.21e-06	51.8
Scaffold_10962	NC_007581	80.851	47	9	0	1430	1476	7098	7052	0.006	44.6
Scaffold_10963	NC_021854	96	25	1	0	754	778	16235	16259	0.035	41
Scaffold_10963	NC_008370	96	25	1	0	754	778	17220	17244	0.035	41
Scaffold_10969	NC_007051	67.684	786	223	12	76	856	20450	21209	3.03e-63	246
Scaffold_10969	NC_008723	71.646	395	90	14	1026	1409	25430	25813	8.14e-39	165
Scaffold_10969	NC_018284	70.635	378	95	9	1026	1395	24077	24446	4.21e-36	156
Scaffold_10969	NC_008722	70.635	378	95	9	1026	1395	24990	25359	4.21e-36	156
Scaffold_10969	NC_022758	67.708	384	124	0	1026	1409	22644	23027	1.38e-29	134
Scaffold_10969	KJ596420	68.052	385	121	2	1026	1409	39317	39700	4.81e-29	132
Scaffold_10969	NC_007053	67.792	385	122	2	1026	1409	22952	23335	5.86e-28	129
Scaffold_10969	NC_019513	66.927	384	127	0	1026	1409	22640	22257	3.03e-25	120
Scaffold_10969	NC_008583	66.927	384	127	0	1026	1409	41636	42019	3.03e-25	120
Scaffold_10969	NC_007058	66.927	384	127	0	1026	1409	25223	25606	3.03e-25	120
Scaffold_10969	NC_007054	66.927	384	127	0	1026	1409	21126	21509	3.03e-25	120
Scaffold_10969	NC_007049	66.927	384	127	0	1026	1409	25156	25539	3.03e-25	120
Scaffold_10969	NC_005356	66.927	384	127	0	1026	1409	20279	20662	3.03e-25	120
Scaffold_10969	NC_002661	68.222	343	107	2	1026	1367	39630	39971	3.03e-25	120
Scaffold_10969	DQ530362	66.927	384	127	0	1026	1409	41691	42074	3.03e-25	120
Scaffold_10969	NC_020199	66.667	384	128	0	1026	1409	43563	43946	3.7e-24	116
Scaffold_10969	NC_017968	66.667	384	128	0	1026	1409	11882	11499	3.7e-24	116
Scaffold_10969	NC_012784	66.667	384	128	0	1026	1409	40527	40910	3.7e-24	116
Scaffold_10969	NC_008689	66.667	384	128	0	1026	1409	39201	39584	3.7e-24	116
Scaffold_10969	NC_007057	66.667	384	128	0	1026	1409	24497	24880	3.7e-24	116
Scaffold_10969	JX174275	66.667	384	128	0	1026	1409	22884	23267	3.7e-24	116
Scaffold_10969	AP011956	66.667	384	128	0	1026	1409	39113	39496	3.7e-24	116
Scaffold_10969	NC_020490	68.051	313	94	2	1026	1335	42768	43077	1.57e-22	111
Scaffold_10969	NC_011612	66.406	384	129	0	1026	1409	42831	43214	1.57e-22	111
Scaffold_10969	NC_023500	72.881	118	19	5	1027	1136	39855	39967	8.7e-07	59
Scaffold_10969	NC_021326	72.881	118	19	5	1027	1136	4826	4714	8.7e-07	59
Scaffold_10969	NC_008799	70.94	117	23	2	1027	1136	41232	41344	8.7e-07	59
Scaffold_10969	NC_008798	70.94	117	23	2	1027	1136	41215	41327	8.7e-07	59
Scaffold_10969	NC_003288	72.881	118	19	5	1027	1136	41031	41143	8.7e-07	59
Scaffold_10969	NC_007059	68.421	152	33	4	1027	1169	23944	24089	3.7e-05	53.6
Scaffold_10969	NZ_ACSJ01000019	80	50	7	1	3054	3100	248	297	0.019	44.6
Scaffold_10971	AY583235	84.615	39	3	1	68	103	17517	17555	0.004	42.8
Scaffold_10971	AY583234	84.615	39	3	1	68	103	13124	13162	0.004	42.8
Scaffold_10971	NC_007021	87.879	33	2	1	43	73	80509	80477	0.048	39.2
Scaffold_10973	AP013424	93.548	31	0	2	139	168	24950	24921	0.013	41
Scaffold_10974	JX560968	92.857	28	2	0	34	61	65593	65620	0.003	42.8
Scaffold_10979	NC_024121	90	30	3	0	88	117	132880	132909	0.028	41
Scaffold_10984	NC_016571	100	23	0	0	2561	2583	3120	3142	0.04	42.8
Scaffold_10991	GU229986	89.189	37	2	2	75	109	16821	16785	0.006	42.8
Scaffold_10991	NC_019402	100	22	0	0	344	365	44025	44004	0.022	41
Scaffold_10991	JN849462	100	22	0	0	341	362	116545	116566	0.022	41
Scaffold_10993	NC_007056	66.114	664	184	17	1	651	8600	9235	3.08e-33	143
Scaffold_10993	NC_008722	78.065	155	34	0	1	155	8934	9088	2.37e-28	127
Scaffold_10993	NC_008723	77.419	155	35	0	1	155	9581	9735	1.01e-26	122
Scaffold_10993	NC_021863	79.259	135	28	0	1	135	25037	25171	1.23e-25	118
Scaffold_10993	NC_003288	79.259	135	28	0	1	135	25399	25533	1.23e-25	118
Scaffold_10993	NC_023500	78.519	135	29	0	1	135	24283	24417	5.22e-24	113
Scaffold_10993	NC_021326	78.519	135	29	0	1	135	20398	20264	5.22e-24	113
Scaffold_10993	NC_018284	76.129	155	37	0	1	155	8478	8632	5.22e-24	113
Scaffold_10993	NC_018281	76.129	155	37	0	1	155	8880	9034	5.22e-24	113
Scaffold_10993	NC_010147	78.519	135	29	0	1	135	25498	25632	5.22e-24	113
Scaffold_10993	NC_007065	78.519	135	29	0	1	135	8366	8500	5.22e-24	113
Scaffold_10993	NC_007064	78.519	135	29	0	1	135	8546	8680	5.22e-24	113
Scaffold_10993	NC_007063	78.519	135	29	0	1	135	8549	8683	5.22e-24	113
Scaffold_10993	NC_007061	78.519	135	29	0	1	135	8483	8617	5.22e-24	113
Scaffold_10993	NC_007060	78.519	135	29	0	1	135	8514	8648	5.22e-24	113
Scaffold_10993	NC_007059	78.519	135	29	0	1	135	8380	8514	5.22e-24	113
Scaffold_10993	DQ908929	77.778	135	30	0	1	135	23564	23698	6.36e-23	109
Scaffold_10993	NC_008799	72.642	212	48	8	1	207	25696	25902	1.4e-18	95.1
Scaffold_10993	NC_008799	76.271	118	28	0	516	633	26196	26313	2.08e-16	87.8
Scaffold_10993	NC_007058	72.642	212	48	8	1	207	9425	9631	1.4e-18	95.1
Scaffold_10993	NC_007058	76.271	118	28	0	516	633	9925	10042	2.08e-16	87.8
Scaffold_10993	NC_007057	72.642	212	48	8	1	207	8700	8906	1.4e-18	95.1
Scaffold_10993	NC_007057	76.271	118	28	0	516	633	9200	9317	2.08e-16	87.8
Scaffold_10993	DQ530362	72.642	212	48	8	1	207	25870	26076	1.4e-18	95.1
Scaffold_10993	DQ530362	76.271	118	28	0	516	633	26370	26487	2.08e-16	87.8
Scaffold_10993	NC_021332	74.648	142	35	1	492	633	25449	25589	1.71e-17	91.5
Scaffold_10993	NC_021332	71.895	153	37	6	1	150	24972	25121	2.89e-08	60.8
Scaffold_10993	NC_024391	71.875	160	44	1	492	651	24061	24219	8.84e-15	82.4
Scaffold_10993	NC_024391	71.895	153	37	6	1	150	23584	23733	2.89e-08	60.8
Scaffold_10993	NC_007055	69.672	122	35	2	4	124	8337	8457	0.000637	46.4
Scaffold_10994	NC_007055	76.378	254	60	0	22	275	9496	9243	7.09e-47	188
Scaffold_10994	NC_007055	75.701	107	26	0	427	533	9007	8901	3.22e-13	77
Scaffold_10994	NC_008723	74.525	263	65	2	13	274	10840	10579	8.08e-40	165
Scaffold_10994	NC_008723	71.25	160	46	0	394	553	10303	10144	7.58e-15	82.4
Scaffold_10994	NC_018284	74.157	267	67	2	9	274	9741	9476	2.82e-39	163
Scaffold_10994	NC_018284	71.25	160	46	0	394	553	9200	9041	7.58e-15	82.4
Scaffold_10994	NC_008722	74.157	267	67	2	9	274	10197	9932	2.82e-39	163
Scaffold_10994	NC_008722	71.25	160	46	0	394	553	9656	9497	7.58e-15	82.4
Scaffold_10994	NC_018281	74.144	263	66	2	13	274	10139	9878	9.85e-39	161
Scaffold_10994	NC_018281	71.25	160	46	0	394	553	9602	9443	7.58e-15	82.4
Scaffold_10994	NC_007061	69.767	258	78	0	24	281	9902	9645	1.28e-24	114
Scaffold_10994	NC_007061	67.407	135	44	0	419	553	9177	9043	0.000546	46.4
Scaffold_10994	NC_024391	69.804	255	77	0	20	274	24990	24736	4.48e-24	113
Scaffold_10994	NC_024391	71.053	114	27	3	423	533	24257	24147	4.48e-05	50
Scaffold_10994	NC_008799	69.323	251	77	0	24	274	26840	26590	6.64e-22	105
Scaffold_10994	NC_008799	70.992	131	38	0	423	553	26369	26239	5.83e-10	66.2
Scaffold_10994	NC_023500	69.498	259	77	2	24	281	25528	25271	2.32e-21	104
Scaffold_10994	NC_023500	69.318	176	54	0	378	553	25018	24843	1.12e-12	75.2
Scaffold_10994	NC_021326	69.498	259	77	2	24	281	19153	19410	2.32e-21	104
Scaffold_10994	NC_021326	69.318	176	54	0	378	553	19663	19838	1.12e-12	75.2
Scaffold_10994	NC_010147	69.498	259	77	2	24	281	26743	26486	2.32e-21	104
Scaffold_10994	NC_010147	69.318	176	54	0	378	553	26233	26058	1.12e-12	75.2
Scaffold_10994	NC_007064	69.498	259	77	2	24	281	9791	9534	2.32e-21	104
Scaffold_10994	NC_007064	69.318	176	54	0	378	553	9281	9106	1.12e-12	75.2
Scaffold_10994	NC_007063	69.498	259	77	2	24	281	9794	9537	2.32e-21	104
Scaffold_10994	NC_007063	69.318	176	54	0	378	553	9284	9109	1.12e-12	75.2
Scaffold_10994	NC_007060	69.498	259	77	2	24	281	9759	9502	2.32e-21	104
Scaffold_10994	NC_007060	69.318	176	54	0	378	553	9249	9074	1.12e-12	75.2
Scaffold_10994	NC_007065	68.605	258	81	0	24	281	9611	9354	2.82e-20	100
Scaffold_10994	NC_007065	67.47	166	54	0	388	553	9091	8926	3.02e-07	57.2
Scaffold_10994	NC_007058	68.675	249	78	0	24	272	10827	10579	9.86e-20	98.7
Scaffold_10994	NC_007058	69.863	146	44	0	408	553	10113	9968	5.83e-10	66.2
Scaffold_10994	NC_007057	68.675	249	78	0	24	272	10102	9854	9.86e-20	98.7
Scaffold_10994	NC_007057	69.863	146	44	0	408	553	9388	9243	5.83e-10	66.2
Scaffold_10994	DQ530362	68.675	249	78	0	24	272	27272	27024	9.86e-20	98.7
Scaffold_10994	DQ530362	69.863	146	44	0	408	553	26558	26413	5.83e-10	66.2
Scaffold_10994	NC_003288	70.27	222	64	2	61	281	26607	26387	3.44e-19	96.9
Scaffold_10994	NC_003288	69.318	176	54	0	378	553	26134	25959	1.12e-12	75.2
Scaffold_10994	NC_021332	68.235	255	81	0	20	274	26120	25866	1.2e-18	95.1
Scaffold_10994	NC_021332	71.171	111	32	0	423	533	25645	25535	3.02e-07	57.2
Scaffold_10994	NC_007047	71.429	182	52	0	34	215	10158	9977	1.2e-18	95.1
Scaffold_10994	NC_007059	69.231	221	68	0	61	281	9588	9368	4.19e-18	93.3
Scaffold_10994	NC_007059	68.75	176	55	0	378	553	9115	8940	4.78e-11	69.8
Scaffold_10994	DQ908929	69.231	221	68	0	61	281	24946	24726	4.19e-18	93.3
Scaffold_10994	DQ908929	67.407	135	44	0	419	553	24258	24124	0.000546	46.4
Scaffold_10994	NC_007056	68.868	212	66	0	22	233	9746	9535	6.22e-16	86
Scaffold_10994	NC_007056	72.441	127	35	0	427	553	9269	9143	1.37e-11	71.6
Scaffold_10994	NC_010808	69.73	185	56	0	32	216	27176	26992	7.58e-15	82.4
Scaffold_10994	NC_008583	68.649	185	58	0	32	216	26964	26780	3.93e-12	73.4
Scaffold_10994	NC_007050	68.649	185	58	0	32	216	10589	10405	3.93e-12	73.4
Scaffold_10994	NC_020490	66.284	261	86	2	22	281	28677	28418	1.67e-10	68
Scaffold_10994	NC_007049	68.108	185	59	0	32	216	10482	10298	1.67e-10	68
Scaffold_10994	JX274647	68.108	185	59	0	32	216	26284	26100	1.67e-10	68
Scaffold_10994	NC_017968	67.568	185	60	0	32	216	26559	26743	2.03e-09	64.4
Scaffold_10994	NC_007048	70.866	127	37	0	32	158	10426	10300	7.1e-09	62.6
Scaffold_10994	NC_004615	70.866	127	37	0	32	158	26852	26726	7.1e-09	62.6
Scaffold_10994	NC_008798	70.079	127	38	0	32	158	26547	26421	8.65e-08	59
Scaffold_10995	NC_018857	81.633	49	5	2	702	748	45759	45713	0.021	42.8
Scaffold_10996	HE858210	85.294	34	5	0	165	198	136051	136018	0.029	39.2
Scaffold_10998	NC_020851	90	30	3	0	234	263	26556	26585	0.029	41
Scaffold_10999	NC_011167	88.235	34	3	1	391	423	22105	22072	0.029	41
Scaffold_11	NC_019521	87.097	31	4	0	153	183	50057	50027	0.034	39.2
Scaffold_11002	NZ_ACSJ01000019	84.211	38	5	1	9	46	5171	5207	0.034	39.2
Scaffold_11004	KF381361	100	22	0	0	376	397	153668	153647	0.021	41
Scaffold_11006	NC_023734	68.75	160	44	3	1850	2006	15843	15999	4.05e-06	55.4
Scaffold_11006	NC_024387	68.874	151	39	4	88	234	1763	1909	0.000172	50
Scaffold_11006	NC_007051	73.913	69	18	0	163	231	1902	1970	0.007	44.6
Scaffold_11006	NC_009813	96.154	26	1	0	507	532	5337	5362	0.026	42.8
Scaffold_1101	NC_010808	78.846	52	8	1	155	203	583	634	0.017	42.8
Scaffold_1101	NC_004615	78.846	52	8	1	155	203	583	634	0.017	42.8
Scaffold_11010	KC295538	88.235	34	3	1	505	538	216106	216074	0.034	41
Scaffold_11012	NC_018087	94.286	35	1	1	704	737	127918	127952	3.13e-05	51.8
Scaffold_11013	NC_021316	86.111	36	5	0	1770	1805	37247	37282	0.025	42.8
Scaffold_11013	NC_016571	92.857	28	2	0	1451	1478	123369	123396	0.025	42.8
Scaffold_11013	JX976549	86.111	36	5	0	1770	1805	34266	34231	0.025	42.8
Scaffold_11015	AP013520	88.889	36	3	1	138	173	12669	12703	0.001	44.6
Scaffold_11019	NC_022758	78.313	83	18	0	55	137	12060	11978	4.17e-11	69.8
Scaffold_11019	NC_021323	78.313	83	18	0	55	137	31632	31550	4.17e-11	69.8
Scaffold_11019	NC_020199	78.313	83	18	0	55	137	32754	32672	4.17e-11	69.8
Scaffold_11019	NC_019513	78.313	83	18	0	55	137	33475	33557	4.17e-11	69.8
Scaffold_11019	NC_011612	78.313	83	18	0	55	137	32000	31918	4.17e-11	69.8
Scaffold_11019	NC_007054	78.313	83	18	0	55	137	12050	11968	4.17e-11	69.8
Scaffold_11019	NC_007053	78.313	83	18	0	55	137	12119	12037	4.17e-11	69.8
Scaffold_11019	NC_007052	78.313	83	18	0	55	137	12049	11967	4.17e-11	69.8
Scaffold_11019	JX174275	78.313	83	18	0	55	137	12050	11968	4.17e-11	69.8
Scaffold_11019	NC_002661	77.108	83	19	0	55	137	28791	28709	1.77e-09	64.4
Scaffold_11019	NC_023582	73.626	91	22	1	49	137	19204	19114	3.21e-06	53.6
Scaffold_11019	NC_013696	90.625	32	2	1	99	129	34399	34368	0.02	41
Scaffold_11019	NC_011801	92.593	27	2	0	465	491	4392	4366	0.02	41
Scaffold_1102	NC_007055	86.486	37	3	1	1988	2024	27684	27718	0.027	42.8
Scaffold_1102	KF021268	84.211	38	6	0	1983	2020	111017	110980	0.027	42.8
Scaffold_11020	NC_019507	88.571	35	3	1	390	424	31689	31722	0.012	42.8
Scaffold_11021	DQ004855	81.633	49	7	1	496	544	82562	82608	0.001	46.4
Scaffold_11021	NC_020490	92.857	28	2	0	708	735	12322	12349	0.017	42.8
Scaffold_11021	NC_007581	84.211	38	6	0	701	738	36047	36084	0.017	42.8
Scaffold_11025	NC_022918	93.103	29	2	0	764	792	106921	106949	0.005	44.6
Scaffold_11025	NC_019726	93.103	29	2	0	764	792	128339	128311	0.005	44.6
Scaffold_11025	EU418428	93.103	29	2	0	764	792	101289	101317	0.005	44.6
Scaffold_11025	AY176327	93.103	29	2	0	764	792	94232	94260	0.005	44.6
Scaffold_11025	NC_014661	78.431	51	7	1	653	699	96486	96536	0.018	42.8
Scaffold_11029	NC_001884	98.519	405	6	0	1	405	12273	11869	0	704
[truncated: 51,196 more rows]

## Sheet: DJ
Supplementary Table S6. MetaPhinder derived identification of bacteriophage signatures in the metagenomics scaffolds (DJ)
query acc.ver	subject acc.ver	% identity	alignment length	mismatches	gap opens	q. start	q. end	s. start	s. end	evalue	bit score
Scaffold_10	NC_009760	75.54	278	68	0	11379	11656	164351	164074	1.04e-47	196
Scaffold_10	KF296717	84.956	113	15	2	7792	7903	42267	42378	6.57e-25	120
Scaffold_10	NC_023719	79.592	49	10	0	11545	11593	169148	169196	0.041	44.6
Scaffold_10	KF554508	74.627	67	17	0	11583	11649	76407	76473	0.041	44.6
Scaffold_10	AP013556	88.889	36	3	1	3274	3309	17908	17874	0.041	44.6
Scaffold_100	NC_019521	91.176	34	3	0	20140	20173	176009	175976	0.006	48.2
Scaffold_100	NC_007581	91.429	35	1	1	12733	12765	106221	106255	0.006	48.2
Scaffold_100	NC_022918	85.714	42	5	1	14385	14425	10646	10605	0.021	46.4
Scaffold_10000	NC_015280	79.365	63	13	0	22686	22748	155033	155095	4.64e-05	55.4
Scaffold_10000	NC_015280	66.341	205	65	2	21321	21523	153747	153949	0.000162	53.6
Scaffold_10000	NC_021852	79.452	73	8	4	6471	6536	22809	22737	0.000162	53.6
Scaffold_10000	NC_020845	74.39	82	21	0	21476	21557	139385	139304	0.000162	53.6
Scaffold_10000	NC_020845	75	72	18	0	22686	22757	138254	138183	0.002	50
Scaffold_10000	NC_015284	76.389	72	17	0	22686	22757	159708	159779	0.000162	53.6
Scaffold_10000	NC_015284	65.196	204	71	0	21348	21551	158449	158652	0.007	48.2
Scaffold_10001	AF234173	87.879	33	4	0	1174	1206	56132	56164	0.026	42.8
Scaffold_10004	GU229986	99.741	386	1	0	418	803	1485	1870	0	691
Scaffold_10004	AP013399	86.111	36	5	0	643	678	16721	16756	0.019	42.8
Scaffold_10004	AP013391	87.879	33	4	0	1323	1355	33691	33659	0.019	42.8
Scaffold_10004	AP013390	87.879	33	4	0	1323	1355	26512	26544	0.019	42.8
Scaffold_10005	DQ222855	69.828	696	186	11	1	691	27759	27083	4.56e-74	280
Scaffold_10005	NC_008723	70.948	327	70	11	635	954	36639	36331	4.28e-30	134
Scaffold_10005	KC595516	75.817	153	37	0	1547	1699	39783	39631	1.71e-22	109
Scaffold_10005	NC_007060	73.196	194	42	6	649	837	36428	36240	3.08e-19	98.7
Scaffold_10005	NC_024391	72.165	194	44	5	649	837	7978	7790	1.31e-17	93.3
Scaffold_10005	NC_007047	72.165	194	44	6	649	837	32814	32626	1.6e-16	89.7
Scaffold_10005	NC_004996	67.147	347	91	10	797	1133	8392	8059	5.57e-16	87.8
Scaffold_10005	NC_014460	73.154	149	34	3	461	606	34645	34500	8.27e-14	80.6
Scaffold_10005	NC_008799	73.154	149	34	3	461	606	10480	10335	8.27e-14	80.6
Scaffold_10005	NC_008798	73.154	149	34	3	461	606	10423	10278	8.27e-14	80.6
Scaffold_10005	NC_008583	73.154	149	34	3	461	606	10366	10221	8.27e-14	80.6
Scaffold_10005	NC_007058	73.154	149	34	3	461	606	36352	36207	8.27e-14	80.6
Scaffold_10005	NC_007049	73.154	149	34	3	461	606	37434	37289	8.27e-14	80.6
Scaffold_10005	NC_003288	73.154	149	34	3	461	606	10977	10832	8.27e-14	80.6
Scaffold_10005	NC_002661	73.154	149	34	3	461	606	10961	10816	8.27e-14	80.6
Scaffold_10005	KJ596420	73.154	149	34	3	461	606	10891	10746	8.27e-14	80.6
Scaffold_10005	DQ530362	73.154	149	34	3	461	606	10269	10124	8.27e-14	80.6
Scaffold_10005	DQ530360	73.154	149	34	3	461	606	10361	10216	8.27e-14	80.6
Scaffold_10005	AP011956	73.154	149	34	3	461	606	12016	11871	8.27e-14	80.6
Scaffold_10005	NC_009810	65.588	340	115	2	786	1124	31424	31086	2.89e-13	78.8
Scaffold_10005	NC_010808	72.483	149	35	3	461	606	10130	9985	1.01e-12	77
Scaffold_10005	NC_023559	65.812	351	110	7	788	1133	5978	5633	1.5e-10	69.8
Scaffold_10005	NC_023500	71.429	147	40	2	461	606	10638	10493	1.5e-10	69.8
Scaffold_10005	NC_021863	71.429	147	40	2	461	606	10322	10177	1.5e-10	69.8
Scaffold_10005	NC_021326	71.429	147	40	2	461	606	34043	34188	1.5e-10	69.8
Scaffold_10005	NC_008689	71.429	147	40	2	461	606	12240	12095	1.5e-10	69.8
Scaffold_10005	NC_007064	71.429	147	40	2	461	606	35635	35490	1.5e-10	69.8
Scaffold_10005	NC_007063	71.429	147	40	2	461	606	36438	36293	1.5e-10	69.8
Scaffold_10005	DQ908929	71.429	147	40	2	461	606	9563	9418	1.5e-10	69.8
Scaffold_10005	NC_023571	65.659	364	114	8	788	1146	5973	5616	5.22e-10	68
Scaffold_10005	NC_023560	65.659	364	114	8	788	1146	5972	5615	5.22e-10	68
Scaffold_10005	NC_015252	76.812	69	16	0	461	529	29833	29765	1.15e-05	53.6
Scaffold_10005	NC_009554	65.504	258	81	5	353	606	30053	29800	0.00014	50
Scaffold_10005	NC_018284	65.705	312	74	14	658	954	33516	33223	0.000489	48.2
Scaffold_10005	NC_021861	73.333	75	20	0	455	529	6231	6157	0.002	46.4
Scaffold_10005	NC_004302	73.333	75	20	0	455	529	7469	7395	0.002	46.4
Scaffold_10005	NC_015254	74.324	74	18	1	461	533	33911	33838	0.006	44.6
Scaffold_10007	NC_019399	96	25	1	0	319	343	31786	31762	0.029	41
Scaffold_10007	JX128259	96	25	1	0	319	343	28958	28934	0.029	41
Scaffold_10008	NC_019399	96	25	1	0	473	497	31786	31762	0.032	41
Scaffold_10008	JX128259	96	25	1	0	473	497	28958	28934	0.032	41
Scaffold_10009	KF296717	96	25	1	0	881	905	42431	42407	0.038	41
Scaffold_1001	NC_015290	86.111	36	5	0	627	662	151791	151756	0.013	42.8
Scaffold_10014	NC_011421	74.747	99	23	2	1460	1557	72878	72781	6.28e-07	59
Scaffold_10014	NC_011421	81.818	55	10	0	1097	1151	73238	73184	7.66e-06	55.4
Scaffold_10014	NC_001884	75	80	20	0	1341	1420	96968	96889	7.66e-06	55.4
Scaffold_10024	AP013496	90.909	33	3	0	826	858	7915	7947	0.002	46.4
Scaffold_10024	AP013459	86.842	38	4	1	1010	1046	4269	4232	0.019	42.8
Scaffold_10025	AP013496	90.909	33	3	0	666	698	7947	7915	0.001	46.4
Scaffold_10031	AP013435	92.593	27	2	0	159	185	1570	1544	0.037	41
Scaffold_10032	KF296717	79.71	69	12	1	2144	2212	42340	42274	4.98e-07	59
Scaffold_10032	NC_007021	96.429	28	0	1	802	828	79044	79017	0.038	42.8
Scaffold_10033	KF296717	84.848	99	15	0	819	917	42372	42274	3.38e-23	111
Scaffold_10038	AP013450	93.103	29	2	0	439	467	16620	16648	0.002	44.6
Scaffold_10038	AP013446	93.103	29	2	0	439	467	29216	29188	0.002	44.6
Scaffold_10040	NC_020877	90.625	32	3	0	1378	1409	103274	103305	0.014	44.6
Scaffold_10040	NC_019511	96.154	26	1	0	1378	1403	16280	16255	0.049	42.8
Scaffold_10042	6.66667e+06	96.296	27	1	0	423	449	42315	42341	0.004	44.6
Scaffold_10042	NC_005135	79.592	49	9	1	1085	1132	128199	128247	0.05	41
Scaffold_10044	NC_022343	92.593	27	2	0	510	536	32951	32977	0.027	41
Scaffold_10051	NC_017978	83.721	43	6	1	237	278	25398	25440	0.005	42.8
Scaffold_10053	NC_015253	92.593	27	2	0	75	101	8969	8943	0.018	41
Scaffold_10056	AB609718	88.571	35	3	1	1369	1402	140874	140908	0.019	42.8
Scaffold_1006	NC_007581	89.744	39	3	1	7398	7435	118431	118393	0.002	50
Scaffold_1006	NC_023559	83.333	48	7	1	3225	3272	36758	36804	0.008	48.2
Scaffold_1006	NC_016562	80	55	8	1	4327	4381	64597	64648	0.008	48.2
Scaffold_1006	KF148616	80	55	8	1	4327	4381	64830	64881	0.008	48.2
Scaffold_1006	NC_018861	79.63	54	8	1	4327	4380	112326	112376	0.029	46.4
Scaffold_1006	NC_001884	78.462	65	9	3	27604	27666	77633	77694	0.029	46.4
Scaffold_1006	HQ906664	86.842	38	5	0	7886	7923	18783	18746	0.029	46.4
Scaffold_1006	FR823450	79.63	54	8	1	4327	4380	63879	63829	0.029	46.4
Scaffold_10061	NC_001884	93.103	29	2	0	4417	4445	73614	73586	0.019	44.6
Scaffold_10068	NC_001884	82.979	47	6	2	1205	1250	61769	61724	0.017	42.8
Scaffold_10074	KC295538	87.879	33	4	0	1101	1133	202897	202865	0.037	42.8
Scaffold_10076	NC_018855	92.593	27	2	0	67	93	154298	154324	0.03	41
Scaffold_10076	NC_014662	88.235	34	2	1	302	333	93267	93300	0.03	41
Scaffold_10076	KF562341	92.593	27	2	0	67	93	120453	120427	0.03	41
Scaffold_10079	KJ920400	78.788	99	15	3	1125	1217	6052	5954	8.43e-13	77
Scaffold_10079	KJ920400	96.875	32	1	0	1370	1401	4924	4893	9.62e-06	53.6
Scaffold_10079	KJ920400	71.429	98	21	3	222	314	6035	5940	0.005	44.6
Scaffold_10079	HE614282	78.788	99	15	3	1125	1217	36550	36648	8.43e-13	77
Scaffold_10079	HE614282	97.222	36	1	0	1369	1404	37819	37854	6.48e-08	60.8
Scaffold_10079	HE614282	71.429	98	21	3	222	314	36567	36662	0.005	44.6
Scaffold_10079	NC_011167	94.737	38	2	0	1367	1404	13428	13465	6.48e-08	60.8
Scaffold_10079	NC_011167	94.286	35	2	0	1369	1403	12916	12950	2.76e-06	55.4
Scaffold_10079	NC_011167	88.571	35	4	0	1369	1403	13311	13345	0.001	46.4
Scaffold_10079	GU229986	94.737	38	2	0	1367	1404	52100	52137	6.48e-08	60.8
Scaffold_10079	GU229986	94.286	35	2	0	1369	1403	51588	51622	2.76e-06	55.4
Scaffold_10079	GU229986	88.571	35	4	0	1369	1403	51983	52017	0.001	46.4
Scaffold_10079	NC_020851	92.857	28	2	0	686	713	180736	180763	0.017	42.8
Scaffold_1008	NC_019401	76.471	85	16	2	21851	21935	284265	284185	3.57e-06	59
Scaffold_1008	NC_019516	82.222	45	8	0	21834	21878	23422	23378	0.023	46.4
Scaffold_1008	NC_009815	90.909	33	3	0	4992	5024	23596	23564	0.023	46.4
Scaffold_10080	NC_019401	66.369	336	101	7	1783	2112	150373	150702	1.26e-12	77
Scaffold_10080	KC295538	66.202	287	87	6	1789	2070	332432	332151	2.77e-08	62.6
Scaffold_10080	NC_019526	70.476	105	31	0	1952	2056	48504	48608	0.000175	50
Scaffold_10080	NC_019490	83.333	48	6	2	1004	1051	1196	1241	0.007	44.6
Scaffold_10083	AP013405	90	30	3	0	63	92	21769	21740	0.034	41
Scaffold_10088	NC_023719	84.615	39	5	1	451	488	390329	390291	0.021	41
Scaffold_10089	KF021268	87.5	32	4	0	228	259	49143	49112	0.018	41
Scaffold_10097	HM246720	90.323	31	3	0	1779	1809	33311	33341	0.027	42.8
Scaffold_10098	NC_023571	85	40	5	1	164	203	41399	41437	0.018	42.8
Scaffold_101	NC_011167	84.913	1498	208	7	32149	33637	35445	36933	0	1667
Scaffold_101	NC_011167	65.772	894	267	10	29485	30363	33906	34775	2.6e-55	223
Scaffold_101	NC_011167	66.71	766	224	16	28303	29051	32721	33472	5.35e-45	188
Scaffold_101	NC_011167	81	100	16	2	34197	34295	36933	37030	3.86e-15	89.7
Scaffold_101	NC_011167	81.053	95	14	3	37679	37770	40410	40503	2e-12	80.6
Scaffold_101	NC_011167	65.607	346	108	5	27674	28015	32095	32433	8.5e-11	75.2
Scaffold_101	NC_011167	89.744	39	4	0	35809	35847	40432	40470	0.000278	53.6
Scaffold_101	GU229986	84.913	1498	208	7	32149	33637	22815	24303	0	1667
Scaffold_101	GU229986	74.854	342	78	4	27367	27706	337	2	3.16e-54	219
Scaffold_101	GU229986	65.66	894	268	10	29485	30363	21276	22145	3.16e-54	219
Scaffold_101	GU229986	66.71	766	224	16	28303	29051	20091	20842	5.35e-45	188
Scaffold_101	GU229986	81	100	16	2	34197	34295	24303	24400	3.86e-15	89.7
Scaffold_101	GU229986	81.053	95	14	3	37679	37770	27780	27873	2e-12	80.6
Scaffold_101	GU229986	65.607	346	108	5	27674	28015	19465	19803	8.5e-11	75.2
Scaffold_101	GU229986	89.744	39	4	0	35809	35847	27802	27840	0.000278	53.6
Scaffold_101	NC_009737	70.449	1895	513	22	16034	17918	9764	11621	0	836
Scaffold_101	NC_009737	65.769	891	290	10	18422	19300	12144	13031	8.48e-49	201
Scaffold_101	NC_009737	64.706	510	172	5	24337	24842	18439	18944	3.17e-16	93.3
Scaffold_101	NC_009737	63.09	699	218	16	23198	23881	17310	17983	5.36e-07	62.6
Scaffold_101	NC_008376	70.299	1909	520	22	16034	17932	9767	11638	0	830
Scaffold_101	NC_008376	65.817	667	224	2	18479	19143	12203	12867	1.44e-39	170
Scaffold_101	NC_008376	65.109	685	233	4	24337	25018	18115	18796	5.72e-32	145
Scaffold_101	NC_008376	66.176	340	99	7	23425	23756	17203	17534	6.98e-12	78.8
Scaffold_101	NC_008376	75	80	20	0	23959	24038	17737	17816	7.96e-05	55.4
Scaffold_101	NC_018085	92.514	521	39	0	33103	33623	17098	17618	0	764
Scaffold_101	NC_018085	69.651	1631	447	18	28742	30363	13424	15015	0	672
Scaffold_101	NC_018085	86.758	219	29	0	15500	15718	40947	41165	8.48e-68	264
Scaffold_101	NC_018085	71.947	303	69	9	40056	40344	24025	24325	8.49e-30	138
Scaffold_101	NC_018085	70.455	176	50	2	27672	27846	12354	12528	2.44e-11	77
Scaffold_101	NC_018085	69.192	198	53	3	39678	39868	23656	23852	2.44e-11	77
Scaffold_101	NC_018085	86.885	61	7	1	37679	37739	20013	20072	1.04e-09	71.6
Scaffold_101	NC_018085	85.714	56	8	0	34192	34247	17599	17654	4.4e-08	66.2
Scaffold_101	HE614282	91.985	524	42	0	33100	33623	18480	19003	0	756
Scaffold_101	HE614282	68.871	1648	437	33	28742	30363	14122	15719	8.44e-163	580
Scaffold_101	HE614282	84.878	205	31	0	15507	15711	322	526	1.75e-57	230
Scaffold_101	HE614282	71.947	303	69	9	40056	40344	25413	25713	8.49e-30	138
Scaffold_101	HE614282	68.203	434	126	10	27517	27945	12902	13328	1.54e-26	127
Scaffold_101	HE614282	69.192	198	53	3	39678	39868	25044	25240	2.44e-11	77
Scaffold_101	HE614282	89.286	56	6	0	34192	34247	18984	19039	8.5e-11	75.2
Scaffold_101	HE614282	86.885	61	7	1	37679	37739	21401	21460	1.04e-09	71.6
Scaffold_101	KJ920400	95.595	454	20	0	33170	33623	28093	27640	0	729
Scaffold_101	KJ920400	68.871	1648	437	33	28742	30363	31535	29938	8.44e-163	580
Scaffold_101	KJ920400	84.878	205	31	0	15507	15711	45335	45131	1.75e-57	230
Scaffold_101	KJ920400	68.203	434	126	10	27517	27945	32755	32329	1.54e-26	127
Scaffold_101	KJ920400	95.745	47	2	0	35760	35806	25081	25035	2.44e-11	77
Scaffold_101	KJ920400	89.286	56	6	0	34192	34247	27659	27604	8.5e-11	75.2
Scaffold_101	KJ920400	68.902	164	51	0	35390	35553	25479	25316	4.4e-08	66.2
Scaffold_101	NC_019502	93.21	486	33	0	33138	33623	36217	36702	0	728
Scaffold_101	NC_019502	69.755	1630	447	22	28742	30363	32508	34099	0	659
Scaffold_101	NC_019502	73.845	1017	233	16	39345	40342	43275	44277	1.34e-166	592
Scaffold_101	NC_019502	85.581	215	29	1	15507	15721	17938	18150	2.27e-62	246
Scaffold_101	NC_019502	75.974	154	33	4	38336	38487	39349	39500	2.6e-17	96.9
Scaffold_101	NC_019502	71.591	176	48	2	27672	27846	31438	31612	4.7e-14	86
Scaffold_101	NC_019502	94.34	53	2	1	37679	37731	38834	38885	6.98e-12	78.8
Scaffold_101	NC_019502	81.944	72	9	2	34192	34262	36683	36751	4.4e-08	66.2
Scaffold_101	NC_019502	75	96	24	0	34353	34448	36920	37015	4.4e-08	66.2
Scaffold_101	NC_023599	69.249	1652	457	20	28742	30383	14983	16593	0	645
Scaffold_101	NC_023599	80.519	231	34	9	15500	15721	506	734	2.28e-43	183
Scaffold_101	NC_023599	72.727	176	46	2	27672	27846	13913	14087	9.07e-17	95.1
Scaffold_101	NC_023599	72.917	96	25	1	34353	34448	19430	19524	0.000278	53.6
Scaffold_101	NC_023599	75.309	81	16	2	34183	34262	19184	19261	0.001	51.8
Scaffold_101	DQ222855	68.666	1634	458	22	28742	30363	13134	14725	1.63e-165	589
Scaffold_101	DQ222855	77.462	528	112	4	12365	12887	35013	35538	3.84e-110	405
Scaffold_101	DQ222855	91.139	79	5	1	37657	37733	18336	18414	4.12e-21	109
Scaffold_101	DQ222855	84.536	97	12	1	34183	34276	17138	17234	5.02e-20	105
Scaffold_101	DQ222855	68.878	196	58	3	27654	27847	12036	12230	1.26e-08	68
Scaffold_101	DQ222855	93.939	33	2	0	35809	35841	18380	18412	0.001	51.8
Scaffold_101	JN797798	70.61	820	219	9	39330	40141	133880	134685	2.27e-100	372
Scaffold_101	HM072038	67.115	818	248	10	7026	7831	32914	33722	1.18e-59	237
Scaffold_101	HM072038	66.971	548	147	13	1635	2171	27136	27660	5.72e-32	145
Scaffold_101	HM072038	67.943	209	59	2	6190	6394	32027	32231	2.97e-10	73.4
Scaffold_101	HM072038	69.355	124	38	0	1047	1170	26489	26612	0.000278	53.6
Scaffold_101	HM072038	76.389	72	17	0	1387	1458	26829	26900	0.000278	53.6
Scaffold_101	HM072038	85.417	48	4	2	14811	14858	37776	37820	0.003	50
Scaffold_101	KF296717	66.063	607	185	9	29357	29954	32687	33281	5.72e-32	145
Scaffold_101	KF296717	69.101	178	55	0	27670	27847	30975	31152	2.97e-10	73.4
Scaffold_101	KF296717	78.082	73	16	0	29009	29081	32336	32408	1.87e-06	60.8
Scaffold_101	KF296717	63.959	394	136	6	1086	1476	2914	3304	0.003	50
Scaffold_101	NC_011645	66.809	470	145	6	29546	30011	14631	15093	1.54e-26	127
Scaffold_101	NC_011645	71.545	123	35	0	27670	27792	12730	12852	1.54e-07	64.4
Scaffold_101	NC_011645	65.569	334	89	11	28760	29081	13844	14163	6.53e-06	59
Scaffold_101	NC_011645	63.959	394	136	6	1086	1476	21358	21748	0.003	50
Scaffold_101	NC_012756	64.933	596	189	6	17271	17850	14233	14824	1.87e-25	123
Scaffold_101	NC_012756	81.061	132	23	2	18726	18856	15948	16078	7.95e-24	118
Scaffold_101	NC_012756	68.182	220	70	0	18079	18298	15301	15520	5.73e-13	82.4
Scaffold_101	NC_012756	67.143	280	78	7	20181	20453	17428	17700	1.04e-09	71.6
Scaffold_101	NC_012756	80.392	51	10	0	19602	19652	16827	16877	0.012	48.2
Scaffold_101	NC_024205	64.01	803	234	17	39331	40104	75500	74724	7.95e-24	118
Scaffold_101	NC_022769	64.483	687	207	13	39326	39998	77147	76484	9.69e-23	114
Scaffold_101	NC_022769	70.803	137	36	2	35410	35544	23478	23344	5.36e-07	62.6
Scaffold_101	NC_022769	67.133	143	47	0	35410	35552	23241	23099	0.041	46.4
Scaffold_101	NC_022763	64.266	708	232	9	39331	40032	77882	77190	9.69e-23	114
Scaffold_101	6.66667e+06	64.392	674	219	9	39331	39998	113426	114084	3.38e-22	113
Scaffold_101	NC_018856	64.511	665	201	13	39331	39976	50171	49523	4.12e-21	109
Scaffold_101	NC_022776	72.549	204	50	4	4559	4759	4651	4851	1.75e-19	104
Scaffold_101	NC_010353	72.549	204	50	4	4559	4759	28276	28476	1.75e-19	104
Scaffold_101	NC_007019	72.549	204	50	4	4559	4759	27685	27885	1.75e-19	104
Scaffold_101	KJ489402	64.244	688	207	15	39326	39998	75335	74672	2.13e-18	100
Scaffold_101	NC_021865	67.114	298	98	0	26686	26983	9896	10193	2.6e-17	96.9
Scaffold_101	NC_024211	64.532	609	179	14	39319	39915	79115	78532	9.07e-17	95.1
Scaffold_101	NC_023007	72.5	160	40	2	35386	35543	106779	106622	4.7e-14	86
Scaffold_101	NC_016563	64.338	544	146	15	39320	39844	53151	52637	5.73e-13	82.4
Scaffold_101	NC_018284	68.05	241	75	2	1035	1274	27005	27244	2e-12	80.6
Scaffold_101	NC_008722	68.05	241	75	2	1035	1274	28178	28417	2e-12	80.6
Scaffold_101	NC_008723	68.837	215	65	2	1061	1274	29429	29642	6.98e-12	78.8
Scaffold_101	JX409895	74.242	132	32	2	20230	20360	36884	36754	6.98e-12	78.8
Scaffold_101	JX409894	74.242	132	32	2	20230	20360	25037	24907	6.98e-12	78.8
Scaffold_101	NC_018857	63.607	610	183	14	39319	39915	110139	110722	1.04e-09	71.6
Scaffold_101	NC_009812	72.059	136	34	2	4557	4690	35373	35506	3.61e-09	69.8
Scaffold_101	KC581799	72.903	155	36	6	23560	23711	15450	15299	3.61e-09	69.8
Scaffold_101	KC348603	72.903	155	36	6	23560	23711	30057	29906	3.61e-09	69.8
Scaffold_101	NC_019456	73.05	141	23	7	25114	25248	2569	2700	4.4e-08	66.2
Scaffold_101	KF554508	69.182	159	49	0	35385	35543	47236	47394	4.4e-08	66.2
Scaffold_101	NC_019508	97.368	38	1	0	25207	25244	16903	16940	1.54e-07	64.4
Scaffold_101	NC_019506	97.368	38	1	0	25207	25244	17130	17167	1.54e-07	64.4
Scaffold_101	NC_023551	63.923	413	137	5	20284	20690	34986	34580	5.36e-07	62.6
Scaffold_101	NC_015270	63.923	413	137	5	20284	20690	13950	14356	5.36e-07	62.6
Scaffold_101	NC_024391	67.368	190	61	1	1088	1276	1026	1215	1.87e-06	60.8
Scaffold_101	NC_010147	65.844	243	77	2	1037	1276	946	1185	1.87e-06	60.8
Scaffold_101	KC348599	66.116	242	72	4	20229	20465	21298	21062	6.53e-06	59
Scaffold_101	NC_022914	75	84	21	0	20737	20820	5392	5475	2.28e-05	57.2
Scaffold_101	NC_009552	67.702	161	52	0	23722	23882	8635	8795	2.28e-05	57.2
Scaffold_101	NC_007917	69.767	129	39	0	14046	14174	31755	31883	2.28e-05	57.2
Scaffold_101	NC_007058	79.268	82	9	5	25162	25241	7762	7837	2.28e-05	57.2
Scaffold_101	NC_018285	67.805	205	60	5	4558	4759	15165	15366	7.96e-05	55.4
Scaffold_101	JF767210	90	40	4	0	25206	25245	6093	6132	7.96e-05	55.4
Scaffold_101	KC595512	67.296	159	52	0	35386	35544	79766	79924	0.000278	53.6
Scaffold_101	NC_012740	88.889	36	4	0	7472	7507	15010	14975	0.012	48.2
Scaffold_101	NC_005066	88.889	36	4	0	7472	7507	13741	13706	0.012	48.2
Scaffold_101	NC_024137	77.419	62	12	1	9513	9574	130407	130466	0.041	46.4
Scaffold_101	NC_007581	90.909	33	3	0	25207	25239	123856	123824	0.041	46.4
Scaffold_10103	NC_016563	100	24	0	0	3585	3608	33414	33437	0.021	44.6
Scaffold_10104	NC_020851	96	25	1	0	497	521	15361	15385	0.048	41
Scaffold_10105	NC_005282	100	23	0	0	816	838	68071	68093	0.012	42.8
Scaffold_1011	AP011616	96	25	1	0	338	362	35127	35151	0.022	41
Scaffold_10114	HM246720	83.721	43	4	2	378	419	42351	42311	0.046	41
Scaffold_10115	NC_012663	100	22	0	0	1038	1059	33841	33820	0.046	41
Scaffold_10115	AP013518	92.593	27	2	0	908	934	28765	28739	0.046	41
Scaffold_10116	NC_017978	73.973	73	13	2	604	670	19894	19822	0.021	42.8
Scaffold_10116	DQ394806	90.323	31	3	0	1506	1536	30206	30236	0.021	42.8
Scaffold_1012	AP011616	96	25	1	0	338	362	35127	35151	0.048	41
Scaffold_10123	NC_006565	85.366	41	5	1	435	474	14844	14804	0.003	44.6
Scaffold_10123	NC_007021	93.333	30	1	1	430	458	50682	50711	0.009	42.8
Scaffold_10124	NC_019521	87.5	32	4	0	1	32	61600	61631	0.048	41
Scaffold_10129	NC_015279	87.5	40	2	2	2537	2573	91889	91850	0.021	44.6
Scaffold_10130	FR775895	93.103	29	2	0	1220	1248	69028	69056	0.006	44.6
Scaffold_10133	HM072038	74.359	78	18	2	1951	2027	14171	14247	0.024	44.6
Scaffold_10139	AP013371	87.879	33	4	0	77	109	26314	26346	0.023	42.8
Scaffold_10139	AB609718	96.154	26	1	0	761	786	10741	10766	0.023	42.8
Scaffold_10146	NC_021803	84.615	39	5	1	278	315	65186	65224	0.026	41
Scaffold_10148	NC_021804	96.154	26	1	0	2525	2550	508	533	0.035	42.8
Scaffold_10155	AP013436	96.296	27	1	0	714	740	8889	8915	0.007	44.6
Scaffold_10155	NC_019507	92.857	28	2	0	1133	1160	18244	18271	0.023	42.8
Scaffold_10156	AP013469	88.571	35	2	1	2	36	7753	7785	0.014	42.8
Scaffold_10156	AP013556	83.784	37	6	0	4	40	23850	23814	0.049	41
Scaffold_1016	NC_018284	86.486	37	5	0	10839	10875	29193	29229	0.047	44.6
Scaffold_10160	NC_019910	84.615	39	6	0	99	137	111150	111112	0.007	44.6
Scaffold_10160	NC_013693	84.615	39	6	0	99	137	15885	15923	0.007	44.6
Scaffold_10168	KF296717	88.125	160	14	2	171	330	42273	42427	8.76e-50	199
Scaffold_10168	NC_019526	93.103	29	2	0	1193	1221	20497	20525	0.004	44.6
Scaffold_10168	KF301602	79.245	53	9	1	1142	1192	18890	18942	0.004	44.6
Scaffold_10168	KC438283	86.111	36	5	0	105	140	65632	65597	0.015	42.8
Scaffold_10169	NC_021325	81.25	48	6	1	831	875	2795	2748	0.014	44.6
Scaffold_10172	HQ641352	90.625	32	3	0	1629	1660	69736	69705	0.018	44.6
Scaffold_10172	HQ641348	90.625	32	3	0	1629	1660	64477	64446	0.018	44.6
Scaffold_10175	NC_010576	87.179	39	1	2	517	551	43318	43356	0.025	42.8
Scaffold_10176	NC_023007	70.171	409	117	3	289	694	107078	107484	4.85e-44	179
Scaffold_10176	KJ920400	71	300	83	3	436	733	25713	26010	4.25e-32	140
Scaffold_10176	NC_018857	72.093	172	43	2	424	590	4243	4072	6.74e-17	89.7
Scaffold_10176	NC_016563	74.242	132	34	0	402	533	592	723	8.21e-16	86
Scaffold_10176	NC_021865	66.786	280	87	2	457	733	14485	14209	1e-14	82.4
Scaffold_10176	NC_024211	66.795	259	81	3	279	533	27058	27315	1.81e-11	71.6
Scaffold_10176	NC_023599	64.238	453	156	5	284	733	20534	20085	6.31e-11	69.8
Scaffold_10176	KC348600	81.69	71	13	0	310	380	5541	5611	6.31e-11	69.8
Scaffold_10176	KC348600	70.229	131	36	1	460	587	5694	5824	1.14e-07	59
Scaffold_10176	NC_019502	63.717	452	159	4	284	733	38025	37577	9.37e-09	62.6
Scaffold_10177	NC_023007	69.951	406	118	2	1148	1551	107078	107481	3.75e-43	178
Scaffold_10177	KJ920400	67.712	319	103	0	1274	1592	25692	26010	4.57e-23	111
Scaffold_10177	NC_023599	67.918	293	93	1	1301	1592	20377	20085	2.37e-20	102
Scaffold_10177	NC_023599	81.818	55	10	0	1143	1197	20534	20480	3.08e-06	55.4
Scaffold_10177	NC_021865	66.787	277	92	0	1316	1592	14485	14209	1.82e-15	86
Scaffold_10177	NC_019502	66.144	319	107	1	1274	1592	37894	37577	1.82e-15	86
Scaffold_10177	NC_019502	81.818	55	10	0	1143	1197	38025	37971	3.08e-06	55.4
Scaffold_10177	NC_018857	71.512	172	44	2	1283	1449	4243	4072	1.82e-15	86
Scaffold_10177	NC_024211	67.181	259	80	3	1138	1392	27058	27315	3.29e-12	75.2
Scaffold_10177	NC_016563	73.171	123	33	0	1270	1392	601	723	1.15e-11	73.4
Scaffold_10177	KC348600	81.69	71	13	0	1169	1239	5541	5611	1.4e-10	69.8
Scaffold_10177	HM072038	75.714	70	12	2	1321	1386	20742	20674	0.002	46.4
Scaffold_10177	NC_011167	71.429	84	24	0	1255	1338	40010	39927	0.006	44.6
Scaffold_10177	GU229986	71.429	84	24	0	1255	1338	27380	27297	0.006	44.6
Scaffold_10179	KF296717	85.246	61	8	1	5607	5666	42334	42274	6.95e-09	66.2
Scaffold_10187	NC_020877	72.821	195	51	1	184	378	16422	16614	1.73e-23	111
Scaffold_10187	NC_020877	68.858	289	82	6	175	455	27620	27908	3.82e-19	96.9
Scaffold_10187	NC_020877	71.765	170	38	4	201	370	21805	21964	8.42e-15	82.4
Scaffold_10187	NC_020877	67.206	247	75	4	182	427	9241	9482	1.85e-10	68
Scaffold_10187	NC_019511	71.795	195	53	1	184	378	107549	107357	8.99e-21	102
Scaffold_10187	NC_019511	68.858	289	82	6	175	455	95009	94721	3.82e-19	96.9
Scaffold_10187	NC_019511	71.765	170	38	4	201	370	100836	100677	8.42e-15	82.4
Scaffold_10187	NC_019511	67.48	246	74	4	182	422	113358	113114	1.52e-11	71.6
Scaffold_10187	NC_015253	73.973	146	35	2	157	299	37946	38091	6.91e-16	86
Scaffold_10187	NC_015253	70.27	148	30	7	347	491	85347	85483	4.97e-05	50
Scaffold_10187	NC_015253	81.818	55	8	2	440	492	87267	87321	0.000174	48.2
Scaffold_10187	NC_007581	74.797	123	26	2	355	476	128318	128200	1.03e-13	78.8
Scaffold_10187	NC_007581	89.583	48	5	0	443	490	103009	102962	2.26e-09	64.4
Scaffold_10187	NC_007581	70.94	117	30	2	186	298	103242	103126	4.08e-06	53.6
Scaffold_10187	NC_020863	78.495	93	18	2	188	279	104149	104058	1.52e-11	71.6
Scaffold_10187	NZ_ACSJ01000013	89.583	48	5	0	443	490	4578	4625	2.26e-09	64.4
Scaffold_10187	NZ_ACSJ01000013	70.94	117	30	2	186	298	4345	4461	4.08e-06	53.6
Scaffold_10187	KF021268	66.79	271	80	7	151	419	24253	24515	2.75e-08	60.8
Scaffold_10187	KF021268	82.692	52	9	0	440	491	132173	132122	4.08e-06	53.6
Scaffold_10187	JX181824	80.46	87	6	7	436	517	53960	53880	9.6e-08	59
Scaffold_10187	NC_020201	77.907	86	11	5	436	517	4828	4747	1.17e-06	55.4
Scaffold_10187	NC_015271	77.419	62	7	1	354	415	13386	13440	1.43e-05	51.8
Scaffold_10187	EU418428	74.026	77	20	0	440	516	34894	34818	4.97e-05	50
Scaffold_10187	AY176327	74.026	77	20	0	440	516	27844	27768	4.97e-05	50
Scaffold_10187	NC_008694	76.25	80	14	4	440	517	14291	14367	0.000606	46.4
Scaffold_10187	NC_020416	73.684	95	17	5	443	532	130124	130033	0.002	44.6
Scaffold_10187	NC_023593	71.084	83	24	0	435	517	39854	39772	0.007	42.8
Scaffold_10187	NC_016163	78.182	55	11	1	385	439	253305	253358	0.007	42.8
Scaffold_10187	NC_007021	86.111	36	5	0	216	251	58720	58755	0.007	42.8
Scaffold_10187	KF302037	76.316	76	13	4	443	516	41950	42022	0.007	42.8
Scaffold_10187	NC_002703	80	55	7	3	436	488	21441	21493	0.026	41
Scaffold_10187	KF055347	100	22	0	0	470	491	38481	38502	0.026	41
Scaffold_10187	KC139638	100	22	0	0	470	491	8319	8298	0.026	41
Scaffold_10187	JX560968	100	22	0	0	470	491	48281	48260	0.026	41
Scaffold_10187	HQ630627	92.593	27	2	0	350	376	74710	74684	0.026	41
Scaffold_1019	DQ222855	70.608	296	76	3	2509	2800	23394	23106	4.01e-30	138
Scaffold_1019	AP013400	87.179	39	3	1	8725	8763	3628	3664	0.019	46.4
Scaffold_10191	NC_016564	79.245	53	11	0	8711	8763	18996	18944	0.012	46.4
Scaffold_10193	AB609718	96.154	26	1	0	158	183	155	130	0.006	42.8
Scaffold_10193	KF114878	93.103	29	1	1	200	227	6570	6598	0.022	41
Scaffold_10198	NC_021856	83.607	61	8	2	414	472	14084	14024	8.19e-08	59
Scaffold_10198	AB091475	83.607	61	8	2	414	472	2460	2520	8.19e-08	59
Scaffold_10198	NC_021784	79.381	97	8	9	403	491	356	264	9.98e-07	55.4
Scaffold_10199	NC_004814	90.909	33	2	1	1768	1800	6187	6218	0.024	42.8
Scaffold_10202	KF751795	87.179	39	5	0	2065	2103	14697	14735	0.001	48.2
Scaffold_10202	KF751793	87.179	39	5	0	2065	2103	17643	17681	0.001	48.2
Scaffold_10203	NC_004902	84	50	6	2	2373	2421	11605	11653	0.001	48.2
Scaffold_10204	NC_009603	75	124	31	0	7356	7479	42807	42930	4.09e-14	84.2
Scaffold_10204	NC_015290	72.993	137	37	0	2007	2143	151223	151087	4.98e-13	80.6
Scaffold_10209	NC_007045	93.333	30	1	1	1519	1547	4	33	0.02	42.8
Scaffold_10209	AP013402	90.323	31	3	0	541	571	31271	31241	0.02	42.8
Scaffold_10213	AB746912	82.979	47	7	1	1265	1311	14240	14285	0.002	46.4
Scaffold_10215	NC_019726	90	30	3	0	185	214	93809	93838	0.021	41
Scaffold_10215	EU418428	90	30	3	0	185	214	133623	133594	0.021	41
Scaffold_10215	AY176327	90	30	3	0	185	214	119412	119383	0.021	41
Scaffold_10216	NC_019726	90	30	3	0	259	288	93809	93838	0.018	41
Scaffold_10216	EU418428	90	30	3	0	259	288	133623	133594	0.018	41
Scaffold_10216	AY176327	90	30	3	0	259	288	119412	119383	0.018	41
Scaffold_10217	NC_020843	93.548	31	1	1	394	424	47789	47818	0.002	44.6
Scaffold_10217	AP013382	87.5	32	4	0	8	39	15481	15450	0.028	41
Scaffold_10218	NC_022918	90.476	42	1	3	211	252	13417	13455	0.000223	48.2
Scaffold_10218	KC595511	93.103	29	2	0	216	244	73097	73069	0.003	44.6
Scaffold_10218	NC_022769	86.842	38	4	1	211	247	146735	146698	0.009	42.8
Scaffold_10218	NC_019726	91.429	35	1	2	218	252	77724	77692	0.009	42.8
Scaffold_10218	NC_019448	88.095	42	2	3	211	252	10669	10707	0.009	42.8
Scaffold_10218	KJ489402	86.842	38	4	1	211	247	145232	145195	0.009	42.8
Scaffold_10218	EU418428	91.429	35	1	2	218	252	10398	10430	0.009	42.8
Scaffold_10218	AY176327	91.429	35	1	2	218	252	3351	3383	0.009	42.8
Scaffold_10218	NC_024211	92.593	27	2	0	663	689	114082	114108	0.033	41
Scaffold_10218	NC_022763	83.333	42	6	1	206	246	154811	154770	0.033	41
Scaffold_10218	NC_018857	92.593	27	2	0	663	689	75475	75449	0.033	41
Scaffold_10218	6.66667e+06	90	30	3	0	219	248	44628	44657	0.033	41
Scaffold_10220	NC_014467	92.593	27	2	0	244	270	44795	44821	0.031	41
Scaffold_10220	HE858210	92.593	27	2	0	244	270	44566	44592	0.031	41
Scaffold_10223	NC_018861	76	75	15	3	269	342	29537	29465	0.012	44.6
Scaffold_10223	AP013517	76.923	65	9	3	1069	1130	13044	12983	0.043	42.8
Scaffold_10225	NC_022791	84.615	39	4	1	105	141	29243	29205	0.049	41
Scaffold_10225	NC_020490	96.296	27	0	1	910	935	36567	36541	0.049	41
Scaffold_10225	NC_019914	96.296	27	0	1	910	935	33629	33603	0.049	41
Scaffold_10227	6.66667e+06	69.595	148	41	4	1680	1825	40913	40768	0.000151	50
Scaffold_10231	NC_019490	83.333	42	5	1	2638	2679	31286	31325	0.046	42.8
Scaffold_10231	NC_015569	86.111	36	5	0	1881	1916	17413	17378	0.046	42.8
Scaffold_10239	NC_007581	82.456	57	10	0	882	938	34229	34285	2.91e-07	59
Scaffold_10239	NZ_ACSJ01000012	83.019	53	3	4	1014	1063	2222	2173	0.022	42.8
Scaffold_1024	KJ817802	87.879	33	4	0	3051	3083	4042	4074	0.04	42.8
Scaffold_10241	NC_015251	88.235	34	2	1	521	552	144485	144452	0.026	41
Scaffold_10242	NC_015456	85.366	41	5	1	2018	2058	17865	17826	0.023	44.6
Scaffold_10245	NC_019516	86.486	37	4	1	8	43	108083	108047	0.032	41
Scaffold_10245	AP013461	96	25	1	0	222	246	12495	12519	0.032	41
Scaffold_10246	AP013461	96	25	1	0	95	119	12495	12519	0.027	41
Scaffold_10247	KF751795	83.333	42	5	1	495	534	13582	13541	0.008	42.8
Scaffold_10247	KF751793	83.333	42	5	1	495	534	16528	16487	0.008	42.8
Scaffold_10255	NC_023719	96.154	26	1	0	517	542	321611	321586	0.012	42.8
Scaffold_10255	KJ920400	81.395	43	8	0	897	939	18734	18776	0.012	42.8
Scaffold_10257	NC_016563	87.5	32	4	0	376	407	83788	83819	0.041	41
Scaffold_10259	AP013400	80.392	51	9	1	3588	3637	15769	15719	0.017	44.6
Scaffold_1026	JX181825	83.333	42	6	1	742	782	89861	89820	0.045	41
Scaffold_10262	NZ_ACSJ01000017	96	25	1	0	598	622	41159	41135	0.037	41
Scaffold_10262	NC_023719	96	25	1	0	780	804	26049	26073	0.037	41
Scaffold_10262	NC_007581	96	25	1	0	598	622	170688	170664	0.037	41
Scaffold_10266	AP013391	90.625	32	2	1	367	397	2790	2759	0.042	41
Scaffold_10266	AP013390	90.625	32	2	1	367	397	23029	23060	0.042	41
Scaffold_10273	JX006077	67.123	511	142	9	38	529	81199	80696	6.05e-34	147
Scaffold_10273	NC_021298	66.733	502	155	8	31	529	41260	41752	5.66e-28	127
Scaffold_10273	NC_021339	66.435	432	135	5	31	460	41008	41431	1.25e-23	113
Scaffold_10273	NC_011292	80.435	46	9	0	322	367	56209	56164	0.019	42.8
Scaffold_10275	NC_024125	82.927	41	7	0	170	210	147296	147336	0.015	42.8
Scaffold_10275	AP011113	82.927	41	7	0	170	210	160709	160749	0.015	42.8
Scaffold_10276	NC_019489	96.154	26	1	0	318	343	34131	34156	0.026	42.8
Scaffold_10276	AP013444	92.857	28	2	0	1098	1125	6837	6864	0.026	42.8
Scaffold_10282	NC_016656	81.633	49	4	2	328	371	25918	25870	0.005	44.6
Scaffold_10283	NC_009760	77.778	54	11	1	801	854	148941	148993	0.048	41
Scaffold_10283	NC_004586	90	30	3	0	781	810	28279	28250	0.048	41
Scaffold_10283	KM051843	73.611	72	13	2	950	1021	124773	124838	0.048	41
Scaffold_10283	KF302034	92.593	27	2	0	819	845	98267	98241	0.048	41
Scaffold_10283	AP013507	81.818	44	7	1	613	655	7434	7391	0.048	41
Scaffold_10284	NC_023719	84.615	39	3	1	549	584	242509	242471	0.01	42.8
Scaffold_10285	NC_023574	83.019	53	6	3	149	200	110496	110446	0.003	44.6
Scaffold_10285	NC_023719	83.784	37	6	0	193	229	35627	35663	0.038	41
Scaffold_10287	HM246720	87.879	33	4	0	368	400	28081	28113	0.007	42.8
Scaffold_10288	NC_023551	73.256	86	16	2	2080	2164	8281	8360	0.000469	50
Scaffold_10290	AP013387	93.103	29	2	0	603	631	23574	23546	0.002	44.6
Scaffold_10292	NC_023719	65.511	548	143	16	5000	5527	180824	181345	7.53e-21	105
Scaffold_10292	NC_023719	78.125	64	14	0	3761	3824	179558	179621	4.17e-05	53.6
Scaffold_10292	NC_014595	67.176	131	23	3	3850	3967	4659	4536	0.002	48.2
Scaffold_10292	NC_021530	88.235	34	4	0	607	640	90313	90346	0.022	44.6
Scaffold_10294	NC_019515	87.5	40	3	1	9246	9285	2135	2098	0.005	48.2
Scaffold_10295	KF296717	76	75	16	2	257	331	42353	42425	0.000112	48.2
Scaffold_103	NC_003524	88.571	35	4	0	1887	1921	21619	21585	0.005	46.4
Scaffold_1030	JF767210	74.648	71	16	1	669	737	6405	6335	0.012	44.6
Scaffold_1030	NC_020877	86.111	36	5	0	3052	3087	13525	13490	0.043	42.8
Scaffold_1030	NC_019511	86.111	36	5	0	3052	3087	110446	110481	0.043	42.8
Scaffold_1030	NC_019508	75.714	70	11	3	669	736	5178	5113	0.043	42.8
Scaffold_1030	NC_019506	75.714	70	11	3	669	736	4998	4933	0.043	42.8
Scaffold_1030	NC_018831	82.927	41	7	0	1359	1399	29416	29456	0.043	42.8
Scaffold_1030	NC_009815	75.385	65	10	2	3268	3329	23367	23428	0.043	42.8
Scaffold_10301	NC_011167	72.414	261	68	4	1595	1853	18511	18769	1.74e-29	132
Scaffold_10301	KJ920400	71.595	257	69	4	1595	1849	44745	44491	1.1e-25	120
Scaffold_10301	HE614282	71.595	257	69	4	1595	1849	912	1166	1.1e-25	120
Scaffold_10301	NC_019502	71.717	99	27	1	574	672	6726	6823	0.000163	50
Scaffold_10301	NC_022918	78.846	52	9	1	119	168	33149	33200	0.024	42.8
Scaffold_10301	NC_019448	78.846	52	9	1	119	168	31385	31436	0.024	42.8
Scaffold_10301	NC_012740	90.323	31	3	0	1063	1093	165106	165076	0.024	42.8
Scaffold_10301	NC_005066	90.323	31	3	0	1063	1093	162706	162676	0.024	42.8
Scaffold_10303	AP011616	70.896	134	28	7	2102	2231	36437	36563	0.018	44.6
Scaffold_1031	NC_023719	84.375	64	10	0	12982	13045	181267	181330	1.24e-09	71.6
Scaffold_1031	KF296717	75.207	121	21	6	161	276	42389	42273	1.84e-07	64.4
Scaffold_1031	NC_012740	91.667	36	2	1	40836	40870	67813	67848	0.014	48.2
Scaffold_1031	NC_005066	91.667	36	2	1	40836	40870	63935	63970	0.014	48.2
Scaffold_1031	JN849462	80.392	51	10	0	5862	5912	234537	234587	0.014	48.2
Scaffold_1031	NC_019521	91.892	37	1	2	9923	9958	33790	33755	0.049	46.4
Scaffold_1031	KJ596420	88.571	35	4	0	22454	22488	7183	7149	0.049	46.4
Scaffold_10311	NC_018861	100	22	0	0	116	137	107754	107775	0.049	41
Scaffold_10311	FR823450	100	22	0	0	116	137	68458	68437	0.049	41
Scaffold_10313	KF296717	72.973	74	20	0	1407	1480	39616	39543	0.006	44.6
Scaffold_10317	NC_020416	96.154	26	1	0	124	149	42944	42919	0.006	42.8
Scaffold_1032	NC_023582	93.333	30	2	0	25969	25998	55856	55827	0.031	46.4
Scaffold_1032	NC_019421	83.673	49	6	2	26729	26775	7176	7128	0.031	46.4
Scaffold_1032	NC_011398	83.673	49	6	2	26729	26775	7168	7120	0.031	46.4
Scaffold_10320	NC_022918	88.889	36	3	1	962	996	10640	10605	0.005	44.6
Scaffold_10324	NC_023007	74.074	162	42	0	6985	7146	106782	106621	3.38e-20	104
Scaffold_10324	KJ920400	91.111	45	4	0	7369	7413	25077	25033	2.97e-08	64.4
Scaffold_10324	KJ920400	68.047	169	54	0	6990	7158	25481	25313	1.04e-07	62.6
Scaffold_10324	NC_022769	70.093	107	32	0	7054	7160	23199	23093	0.000654	50
Scaffold_10324	NC_008723	90.909	33	3	0	90	122	36878	36910	0.008	46.4
Scaffold_10324	NC_001884	71.591	88	25	0	7215	7302	22343	22256	0.008	46.4
Scaffold_10325	NC_011167	89.091	55	4	1	4412	4464	48717	48663	4.73e-10	69.8
Scaffold_10325	GU229986	89.091	55	4	1	4412	4464	36087	36033	4.73e-10	69.8
Scaffold_10325	KJ920400	82.812	64	9	1	4412	4473	18813	18876	2.01e-08	64.4
Scaffold_10325	HM246720	76.712	73	12	3	1501	1570	29688	29618	0.005	46.4
Scaffold_10325	FN667789	76.712	73	12	3	1501	1570	73216	73146	0.005	46.4
Scaffold_10326	AP013380	92.593	27	2	0	23	49	15794	15820	0.031	41
Scaffold_1033	NC_024205	74.747	297	71	2	61	355	46967	46673	4.67e-48	192
Scaffold_1033	NC_018856	74.411	297	72	2	61	355	21132	20838	5.69e-47	188
Scaffold_1033	NC_024211	71.478	291	81	2	61	350	47564	47275	2.12e-33	143
Scaffold_1033	NC_022769	69.966	293	88	0	63	355	46900	46608	3.84e-30	132
Scaffold_1033	NC_018857	73.934	211	55	0	61	271	141721	141931	3.84e-30	132
Scaffold_1033	NC_016563	73.239	213	57	0	61	273	21972	21760	1.63e-28	127
Scaffold_1033	KJ489402	69.625	293	89	0	63	355	44633	44341	1.63e-28	127
Scaffold_1033	6.66667e+06	69.831	295	85	2	63	355	143602	143894	5.7e-28	125
Scaffold_1033	NC_022763	70.37	297	80	5	63	355	47673	47381	1.99e-27	123
Scaffold_1033	NC_021856	69.811	212	64	0	63	274	48293	48082	9.65e-19	95.1
Scaffold_1033	NC_022771	69.34	212	65	0	63	274	45819	45608	4.1e-17	89.7
Scaffold_1033	NC_009760	69.378	209	60	2	143	349	184160	184366	1.74e-15	84.2
Scaffold_1033	NC_020081	71.831	142	40	0	123	264	105912	106053	2.59e-13	77
Scaffold_1033	NC_024137	66.667	219	73	0	132	350	47279	47061	4.68e-10	66.2
Scaffold_1033	NC_020873	65.753	219	75	0	132	350	139198	139416	2.42e-07	57.2
Scaffold_1033	KM051843	68.75	128	40	0	123	250	113567	113694	1.03e-05	51.8
Scaffold_10330	NC_020490	90.385	52	5	0	4536	4587	39084	39033	2.25e-10	71.6
Scaffold_10330	NC_019914	88.462	52	6	0	4536	4587	35593	35542	2.75e-09	68
Scaffold_10330	NC_008723	80.769	52	10	0	4536	4587	23002	22951	0.000737	50
Scaffold_10330	NC_016562	90.909	33	3	0	996	1028	88932	88900	0.009	46.4
Scaffold_10330	NC_004735	78.788	66	11	3	4597	4662	46816	46754	0.009	46.4
Scaffold_10330	KF148616	90.909	33	3	0	996	1028	89168	89136	0.009	46.4
Scaffold_10330	FR823450	90.909	33	3	0	996	1028	39162	39194	0.009	46.4
Scaffold_10331	NC_019408	92.857	28	2	0	290	317	127200	127173	0.027	42.8
Scaffold_10334	KC595511	96	25	1	0	694	718	67193	67217	0.033	41
Scaffold_10335	NC_006565	90.909	33	2	1	1522	1553	45223	45191	0.02	42.8
Scaffold_10336	NC_017975	79.63	54	10	1	13	66	134280	134228	0.005	44.6
Scaffold_10336	JF767210	87.879	33	4	0	395	427	15645	15677	0.016	42.8
Scaffold_10338	NC_019507	92.593	27	2	0	468	494	40998	40972	0.034	41
Scaffold_10338	NC_019506	82.692	52	4	4	35	82	18627	18677	0.034	41
Scaffold_10338	JF767210	82.692	52	4	4	35	82	18862	18912	0.034	41
Scaffold_10338	HM246720	92.593	27	2	0	468	494	13595	13621	0.034	41
Scaffold_10338	FN667789	92.593	27	2	0	468	494	55459	55485	0.034	41
Scaffold_1034	NC_024205	74.074	297	73	2	885	1179	46967	46673	9.01e-45	183
Scaffold_1034	NC_018856	74.074	297	73	2	885	1179	21132	20838	9.01e-45	183
Scaffold_1034	NC_018857	75.829	211	51	0	885	1095	141721	141931	5.33e-35	150
Scaffold_1034	NC_022769	70.99	293	85	0	887	1179	46900	46608	2.26e-33	145
Scaffold_1034	NC_022763	71.717	297	76	5	887	1179	47673	47381	2.76e-32	141
Scaffold_1034	KJ489402	70.648	293	86	0	887	1179	44633	44341	2.76e-32	141
Scaffold_1034	NC_024211	75.234	214	51	2	885	1097	47564	47352	9.63e-32	140
Scaffold_1034	6.66667e+06	70.508	295	83	2	887	1179	143602	143894	4.09e-30	134
Scaffold_1034	NC_016563	73.709	213	56	0	885	1097	21972	21760	1.43e-29	132
Scaffold_1034	NC_021856	70.892	213	60	2	887	1098	48293	48082	2.95e-19	98.7
Scaffold_1034	NC_022771	70.423	213	61	2	887	1098	45819	45608	1.25e-17	93.3
Scaffold_1034	JN797798	69.406	219	67	0	956	1174	135468	135686	1.25e-17	93.3
Scaffold_1034	NC_009760	75	128	32	0	947	1074	184140	184267	5.33e-16	87.8
Scaffold_1034	NC_020081	72.789	147	40	0	942	1088	105907	106053	1.86e-15	86
Scaffold_1034	NC_024137	66.901	284	92	2	892	1174	47343	47061	2.27e-14	82.4
Scaffold_1034	NC_020873	71.681	113	32	0	956	1068	139198	139310	7.41e-08	60.8
Scaffold_1034	KM051843	69.767	129	39	0	946	1074	113566	113694	9.03e-07	57.2
Scaffold_1034	DQ004855	77.193	57	13	0	952	1008	7332	7276	0.006	44.6
Scaffold_1034	NC_017981	82.222	45	7	1	1372	1416	10049	10006	0.02	42.8
Scaffold_10341	AP013395	83.784	37	6	0	626	662	648	684	0.04	41
Scaffold_10345	NC_020879	88.235	34	3	1	32	65	133399	133367	0.043	41
Scaffold_10345	NC_019543	88.235	34	3	1	32	65	132606	132574	0.043	41
Scaffold_10345	JX306041	88.235	34	3	1	32	65	138427	138395	0.043	41
Scaffold_10345	233894	88.235	34	3	1	32	65	133441	133409	0.043	41
Scaffold_10348	NC_019526	87.5	32	4	0	276	307	279198	279167	0.037	41
Scaffold_1035	NC_011021	89.189	37	1	2	754	790	2399	2432	0.017	42.8
Scaffold_1035	6.66667e+06	89.189	37	1	2	754	790	2904	2937	0.017	42.8
Scaffold_1035	6.66667e+06	85	40	4	1	1364	1403	118204	118241	0.017	42.8
Scaffold_1035	6.66667e+06	85	40	4	1	1364	1403	117677	117714	0.017	42.8
Scaffold_10351	NC_014036	93.103	29	2	0	2422	2450	101932	101904	0.009	44.6
Scaffold_10351	NC_020849	87.879	33	4	0	697	729	13144	13112	0.032	42.8
Scaffold_10351	NC_020837	92.857	28	2	0	2538	2565	123490	123517	0.032	42.8
Scaffold_10353	NC_015283	96	25	1	0	281	305	154481	154505	0.03	41
Scaffold_10357	KC581799	89.189	37	4	0	690	726	29730	29694	0.00072	50
Scaffold_10357	KC581799	88.571	35	4	0	352	386	29993	29959	0.009	46.4
Scaffold_10357	KC348603	89.189	37	4	0	690	726	44337	44301	0.00072	50
Scaffold_10357	KC348603	88.571	35	4	0	352	386	44600	44566	0.009	46.4
Scaffold_1036	NC_021854	84.783	46	7	0	5286	5331	24992	24947	0.000209	51.8
Scaffold_1036	NC_021853	84.783	46	7	0	5286	5331	29151	29106	0.000209	51.8
Scaffold_1036	KC182544	84.783	46	7	0	5286	5331	23776	23731	0.000209	51.8
Scaffold_1036	KC182543	84.783	46	7	0	5286	5331	26061	26016	0.000209	51.8
Scaffold_1036	GQ979703	84.783	46	7	0	5286	5331	23950	23905	0.000209	51.8
Scaffold_1036	NC_021852	82.609	46	8	0	5286	5331	27090	27045	0.003	48.2
Scaffold_1036	FJ848883	82.609	46	8	0	5286	5331	26516	26471	0.003	48.2
Scaffold_10366	NC_019401	100	22	0	0	310	331	203574	203553	0.048	41
Scaffold_10368	AP013490	90.323	31	3	0	1433	1463	25829	25859	0.019	42.8
Scaffold_10369	KF156339	100	23	0	0	1172	1194	41846	41824	0.015	42.8
Scaffold_1037	NC_024214	84.091	44	4	1	2555	2595	31902	31945	0.003	46.4
Scaffold_10372	NC_023719	87.5	32	4	0	250	281	417704	417673	0.021	41
Scaffold_10376	NC_023719	87.805	41	4	1	116	156	405838	405877	0.000844	48.2
Scaffold_10376	AP013471	96.154	26	1	0	966	991	29981	30006	0.036	42.8
Scaffold_10377	AP011616	82.979	47	8	0	1799	1845	74503	74549	0.00022	50
Scaffold_10377	NC_015464	73.256	86	17	3	443	522	33404	33489	0.009	44.6
Scaffold_10378	NC_001609	88.235	34	3	1	239	271	644	677	0.034	41
Scaffold_10378	AP013510	83.784	37	6	0	239	275	36915	36879	0.034	41
Scaffold_10381	KF751795	88.571	35	4	0	4496	4530	6298	6264	0.005	46.4
Scaffold_10381	KF751793	88.571	35	4	0	4496	4530	7774	7740	0.005	46.4
Scaffold_10381	NC_024139	88.889	36	3	1	3143	3178	28697	28731	0.017	44.6
Scaffold_10381	NC_019924	88.235	34	4	0	2098	2131	40876	40909	0.017	44.6
Scaffold_10381	NC_017969	88.889	36	3	1	3143	3178	28747	28781	0.017	44.6
Scaffold_10381	NC_015269	88.889	36	3	1	3143	3178	28675	28709	0.017	44.6
Scaffold_10382	NC_007048	93.548	31	1	1	5715	5744	36373	36343	0.024	44.6
Scaffold_10382	NC_003288	93.548	31	1	1	5715	5744	10595	10565	0.024	44.6
Scaffold_10382	AP013555	88.235	34	4	0	585	618	33331	33364	0.024	44.6
Scaffold_10387	M11813	80.952	42	8	0	948	989	4223	4182	0.045	41
Scaffold_10388	NC_001335	75.758	66	15	1	611	676	24119	24183	0.003	44.6
Scaffold_10394	NC_019401	92.857	28	2	0	1160	1187	59574	59547	0.015	42.8
Scaffold_10396	NC_009231	72.449	98	20	4	152	247	36498	36406	0.003	44.6
Scaffold_104	NZ_ACSJ01000018	88.889	36	4	0	2555	2590	11753	11718	0.009	48.2
Scaffold_10401	NC_019511	90.323	31	3	0	1418	1448	67149	67179	0.018	42.8
Scaffold_10402	AB609718	94.118	34	0	2	2307	2339	12938	12970	0.003	46.4
Scaffold_10402	KF296717	88.889	36	3	1	1814	1848	36132	36167	0.012	44.6
Scaffold_10402	6.66667e+06	86.486	37	5	0	2306	2342	24964	25000	0.012	44.6
Scaffold_10403	FN667788	92.857	28	2	0	323	350	88115	88142	0.015	42.8
Scaffold_10403	AP013561	87.5	40	3	2	234	273	13069	13032	0.015	42.8
Scaffold_10404	DQ004855	96	25	1	0	296	320	17789	17813	0.017	41
Scaffold_10406	NC_007051	79.63	54	9	1	4702	4755	24844	24895	0.005	46.4
Scaffold_10406	NC_013597	90.625	32	3	0	1230	1261	16363	16394	0.018	44.6
Scaffold_10407	NC_019487	90	40	4	0	16963	17002	57524	57563	3.4e-05	55.4
Scaffold_10407	NC_018831	72.222	90	25	0	16766	16855	4659	4748	0.001	50
Scaffold_10411	NC_007021	83.721	43	7	0	2052	2094	86163	86205	0.003	46.4
Scaffold_10411	JF767210	89.189	37	3	1	1027	1062	19607	19643	0.003	46.4
Scaffold_10411	KF021268	80.435	46	3	1	1232	1271	114642	114687	0.009	44.6
Scaffold_10411	NC_022767	82.222	45	6	1	2018	2062	76946	76904	0.032	42.8
Scaffold_10411	NC_016163	86.111	36	5	0	2317	2352	233259	233224	0.032	42.8
Scaffold_10411	NC_004629	80.851	47	6	1	907	950	256774	256820	0.032	42.8
Scaffold_10411	AP013397	90.323	31	3	0	2317	2347	14732	14762	0.032	42.8
Scaffold_10415	6.66667e+06	89.744	39	3	1	1077	1115	18353	18390	0.000252	50
Scaffold_10415	NC_024125	87.879	33	4	0	2462	2494	125329	125361	0.037	42.8
Scaffold_10420	NC_007581	90.323	31	3	0	1732	1762	79767	79737	0.048	42.8
Scaffold_10420	NC_004680	81.395	43	8	0	1406	1448	54308	54350	0.048	42.8
Scaffold_10420	D90210	90.323	31	3	0	1732	1762	4423	4393	0.048	42.8
Scaffold_10421	KC581799	70	260	72	4	3839	4095	29169	29425	5.69e-21	105
Scaffold_10421	KC581799	79.245	53	11	0	4374	4426	29677	29729	0.005	46.4
Scaffold_10421	KC348603	70	260	72	4	3839	4095	43776	44032	5.69e-21	105
Scaffold_10421	KC348603	79.245	53	11	0	4374	4426	44284	44336	0.005	46.4
Scaffold_10422	KF005318	87.879	33	4	0	835	867	4480	4448	0.021	42.8
Scaffold_10427	NC_017969	100	23	0	0	590	612	7631	7609	0.023	42.8
Scaffold_10429	NC_019448	87.179	39	5	0	1299	1337	138606	138644	0.000418	48.2
Scaffold_10429	NC_012740	93.103	29	2	0	1297	1325	71787	71815	0.005	44.6
Scaffold_10429	NC_005066	93.103	29	2	0	1297	1325	67911	67939	0.005	44.6
Scaffold_10429	NC_021867	92.857	28	2	0	1134	1161	27645	27618	0.018	42.8
Scaffold_10429	NC_007581	92.857	28	2	0	919	946	9358	9331	0.018	42.8
Scaffold_1043	NC_007581	75.714	70	9	3	3261	3322	24557	24488	0.02	44.6
Scaffold_1044	KF296717	82.222	45	8	0	988	1032	1856	1812	0.002	46.4
Scaffold_1044	NC_021803	100	23	0	0	1088	1110	8485	8507	0.025	42.8
Scaffold_1044	NC_021794	100	23	0	0	1088	1110	9969	9991	0.025	42.8
Scaffold_1044	NC_021792	100	23	0	0	1088	1110	9355	9377	0.025	42.8
Scaffold_1044	NC_021789	100	23	0	0	1088	1110	11066	11088	0.025	42.8
Scaffold_1044	NC_019509	93.333	30	1	1	323	351	32811	32782	0.025	42.8
Scaffold_10441	NC_022965	93.103	29	2	0	619	647	40174	40146	0.009	44.6
Scaffold_10441	6.66667e+06	93.103	29	2	0	619	647	39790	39762	0.009	44.6
Scaffold_10441	AP013544	86.111	36	5	0	749	784	5831	5866	0.03	42.8
Scaffold_10441	6.66667e+06	92.857	28	2	0	620	647	39063	39036	0.03	42.8
Scaffold_10442	AP013430	100	23	0	0	533	555	6897	6919	0.01	42.8
Scaffold_10446	NC_006356	86.111	36	5	0	343	378	14566	14601	0.006	42.8
Scaffold_1045	NC_014457	84.211	38	6	0	1136	1173	31449	31486	0.018	42.8
Scaffold_1045	FR775895	92.857	28	2	0	876	903	104014	104041	0.018	42.8
Scaffold_10450	NC_015288	86.111	36	5	0	304	339	164696	164661	0.023	42.8
Scaffold_10460	NC_019502	78.916	166	24	3	3453	3608	11497	11661	7.7e-31	138
Scaffold_10460	NC_011167	71.324	136	24	7	3341	3463	48663	48796	8.79e-05	51.8
Scaffold_10460	GU229986	71.324	136	24	7	3341	3463	36033	36166	8.79e-05	51.8
Scaffold_10460	KJ920400	89.474	38	3	1	3341	3377	18867	18830	0.001	48.2
Scaffold_10460	NC_007021	80	50	10	0	88	137	95578	95627	0.004	46.4
Scaffold_10463	NC_010576	88.235	34	3	1	139	172	52828	52796	0.025	41
Scaffold_10464	NC_015254	70.748	294	84	2	3862	4154	5394	5102	3.04e-30	136
Scaffold_10464	GQ478087	66.954	348	111	2	3808	4153	23929	23584	1.8e-20	104
Scaffold_10464	KJ417497	88	50	6	0	2599	2648	24140	24091	1.58e-08	64.4
Scaffold_10464	NC_024370	86	50	7	0	2599	2648	17881	17930	6.7e-07	59
Scaffold_10464	NC_024357	86	50	7	0	2599	2648	16673	16722	6.7e-07	59
Scaffold_10464	NC_004303	73.196	97	26	0	514	610	20123	20027	6.7e-07	59
Scaffold_10464	NC_002214	68.293	164	38	4	514	667	7284	7125	2.34e-06	57.2
Scaffold_10464	NC_022776	67.5	160	46	1	514	667	20077	19918	8.16e-06	55.4
Scaffold_10464	NC_008583	89.744	39	4	0	3757	3795	20752	20714	2.85e-05	53.6
Scaffold_10464	DQ530360	89.744	39	4	0	3757	3795	20748	20710	2.85e-05	53.6
Scaffold_10464	NC_020197	80.357	56	11	0	514	569	20467	20412	9.94e-05	51.8
Scaffold_10464	NC_013598	82.456	57	8	2	514	569	6352	6297	9.94e-05	51.8
Scaffold_10464	NC_010353	80.357	56	11	0	514	569	7572	7517	9.94e-05	51.8
Scaffold_10464	NC_007019	80.357	56	11	0	514	569	7564	7509	9.94e-05	51.8
Scaffold_10464	NC_017968	93.75	32	2	0	3764	3795	32778	32809	0.000347	50
Scaffold_10464	NC_014460	93.75	32	2	0	3764	3795	1788	1757	0.000347	50
Scaffold_10464	NC_011614	93.75	32	2	0	3764	3795	19308	19277	0.000347	50
Scaffold_10464	NC_010808	93.75	32	2	0	3764	3795	20976	20945	0.000347	50
Scaffold_10464	NC_008798	93.75	32	2	0	3764	3795	20349	20318	0.000347	50
Scaffold_10464	NC_007050	93.75	32	2	0	3764	3795	4370	4339	0.000347	50
Scaffold_10464	NC_007049	93.75	32	2	0	3764	3795	4283	4252	0.000347	50
Scaffold_10464	NC_007048	93.75	32	2	0	3764	3795	4227	4196	0.000347	50
Scaffold_10464	NC_004615	93.75	32	2	0	3764	3795	20653	20622	0.000347	50
Scaffold_10464	JX274647	93.75	32	2	0	3764	3795	20085	20054	0.000347	50
Scaffold_10464	JX274646	93.75	32	2	0	3764	3795	21049	21018	0.000347	50
Scaffold_10464	NC_023571	68.243	148	45	2	4005	4151	17123	16977	0.001	48.2
Scaffold_10464	EU418428	81.25	48	9	0	1539	1586	134333	134286	0.004	46.4
Scaffold_10464	NC_009819	77.193	57	13	0	2413	2469	20521	20465	0.015	44.6
Scaffold_10466	NC_009813	84.091	44	6	1	507	549	20683	20640	0.007	44.6
Scaffold_10466	NC_017972	88.571	35	3	1	339	373	28368	28335	0.025	42.8
Scaffold_10466	FR823450	76.923	65	9	3	1577	1636	33880	33943	0.025	42.8
Scaffold_1047	KF751795	88.889	36	4	0	1825	1860	4983	4948	0.006	48.2
Scaffold_1047	KF751793	88.889	36	4	0	1825	1860	6459	6424	0.006	48.2
Scaffold_1047	NC_019506	93.333	30	2	0	12046	12075	13571	13542	0.02	46.4
Scaffold_1047	AP013405	100	25	0	0	6377	6401	15713	15689	0.02	46.4
Scaffold_10472	NC_023719	84.091	44	7	0	399	442	202010	202053	0.00015	48.2
Scaffold_10477	NC_013598	78.182	55	11	1	542	596	26654	26601	0.007	42.8
Scaffold_10479	KF296717	75.758	99	22	2	61	159	42370	42274	3.57e-09	64.4
Scaffold_10479	NC_015263	92.593	27	2	0	912	938	65348	65322	0.041	41
Scaffold_1048	NC_009760	76	275	66	0	57639	57913	164351	164077	5.82e-48	199
Scaffold_1048	NC_022767	70.423	213	63	0	13201	13413	72759	72547	4.2e-18	100
Scaffold_1048	NC_001884	71.728	191	50	2	57721	57909	61031	60843	5.11e-17	96.9
Scaffold_1048	NC_023719	67.636	275	66	5	65996	66257	426024	426288	6.23e-16	93.3
Scaffold_1048	KF296717	73.75	160	34	4	62437	62595	42273	42425	7.59e-15	89.7
Scaffold_1048	KF296717	79.208	101	18	2	58038	58135	42326	42426	1.13e-12	82.4
Scaffold_1048	KF296717	74.257	101	24	2	2846	2945	42326	42425	1.28e-05	59
Scaffold_1048	KF296717	94.118	34	2	0	30120	30153	42285	42318	0.000546	53.6
Scaffold_1048	DQ222855	78.889	90	17	2	13291	13379	28849	28937	7.1e-09	69.8
Scaffold_1048	KC348603	73.256	86	23	0	71869	71954	10275	10190	0.002	51.8
Scaffold_1048	HM072038	88.889	36	4	0	31723	31758	23794	23759	0.023	48.2
Scaffold_10482	NC_016562	74.074	81	12	4	677	755	35309	35236	0.021	42.8
Scaffold_10482	NC_015464	74.074	81	12	4	677	755	82929	82856	0.021	42.8
Scaffold_10482	KF148616	74.074	81	12	4	677	755	35543	35470	0.021	42.8
Scaffold_10482	KF114878	84.211	38	6	0	269	306	17100	17137	0.021	42.8
Scaffold_10482	KF021268	82.979	47	6	2	245	291	8224	8268	0.021	42.8
Scaffold_10482	FR823450	74.074	81	12	4	677	755	93166	93239	0.021	42.8
Scaffold_10484	NC_021073	88.889	36	3	1	1412	1446	24137	24172	0.032	44.6
Scaffold_10484	KF302034	88.235	34	4	0	5463	5496	9652	9619	0.032	44.6
Scaffold_10489	NC_017968	90.625	32	3	0	1919	1950	24487	24518	0.008	44.6
Scaffold_10489	NC_007048	90.625	32	3	0	1919	1950	12498	12467	0.008	44.6
Scaffold_10489	NC_004615	90.625	32	3	0	1919	1950	28924	28893	0.008	44.6
Scaffold_10489	NC_023007	79.592	49	7	1	1123	1171	75047	75002	0.027	42.8
Scaffold_10489	NC_017732	92.857	28	2	0	257	284	3645	3672	0.027	42.8
Scaffold_10489	AP013554	86.842	38	4	1	194	230	560	597	0.027	42.8
Scaffold_1049	NC_007052	92.593	27	2	0	197	223	22389	22415	0.024	41
Scaffold_10491	NC_020197	88.571	35	3	1	315	348	17460	17494	0.009	42.8
Scaffold_10491	NC_002214	88.571	35	3	1	315	348	4320	4354	0.009	42.8
Scaffold_10491	AP013386	80	55	4	3	289	340	15285	15235	0.009	42.8
Scaffold_10494	NC_003444	71.287	101	29	0	1359	1459	19218	19118	4.21e-05	51.8
Scaffold_10494	NC_019927	69.388	98	30	0	739	836	6734	6637	0.022	42.8
Scaffold_10495	AP013391	86.111	36	5	0	229	264	7016	7051	0.006	42.8
Scaffold_10496	NC_001901	87.5	32	4	0	34	65	36248	36217	0.039	41
Scaffold_10496	AP013391	85.714	35	5	0	574	608	7016	7050	0.039	41
Scaffold_10497	KC295538	84.211	38	6	0	1203	1240	56643	56680	0.021	42.8
Scaffold_105	NC_009760	75.294	85	21	0	13	97	164263	164347	5.42e-06	59
Scaffold_105	KF751793	91.667	36	3	0	26848	26883	12493	12458	0.000805	51.8
Scaffold_105	NC_023743	93.75	32	1	1	11598	11629	10738	10768	0.034	46.4
Scaffold_105	AP013410	79.31	58	8	2	19819	19872	21037	21094	0.034	46.4
Scaffold_1050	NC_007052	92.593	27	2	0	197	223	22389	22415	0.024	41
Scaffold_10501	NC_013195	90.909	33	3	0	136	168	5635	5603	0.000408	46.4
Scaffold_10501	NC_011614	90.909	33	3	0	136	168	4360	4328	0.000408	46.4
Scaffold_10501	NC_007059	90.909	33	3	0	136	168	31343	31311	0.000408	46.4
Scaffold_10501	KF831354	90.909	33	3	0	136	168	37400	37432	0.000408	46.4
Scaffold_10501	DQ530362	90.909	33	3	0	136	168	4801	4769	0.000408	46.4
Scaffold_10507	NC_015285	90.323	31	3	0	873	903	134989	134959	0.022	42.8
Scaffold_10509	KF296717	74.675	154	31	5	172	322	42422	42274	4.77e-16	87.8
Scaffold_10513	NC_021529	90.323	31	3	0	502	532	85434	85404	0.009	42.8
Scaffold_10513	KF156339	77.419	62	12	2	491	551	106685	106625	0.009	42.8
Scaffold_10518	GU071092	67.568	222	56	5	3418	3628	28072	27856	1.17e-09	68
Scaffold_10518	GU071092	66.867	166	46	2	3453	3609	21638	21473	8.97e-05	51.8
Scaffold_10518	GU071092	66.839	193	53	5	3382	3573	21772	21590	0.001	48.2
Scaffold_10518	AP013411	75	80	20	0	3550	3629	29717	29796	7.37e-06	55.4
Scaffold_10518	AP013411	69.672	122	37	0	3508	3629	29720	29841	2.57e-05	53.6
Scaffold_10518	AP013411	68.254	126	31	1	3387	3503	29488	29613	8.97e-05	51.8
Scaffold_10518	AP013411	69.298	114	26	1	3453	3557	29491	29604	8.97e-05	51.8
Scaffold_10518	AP013411	71.818	110	29	2	3504	3612	29506	29614	8.97e-05	51.8
Scaffold_10518	AP013411	67.521	117	29	1	3540	3656	29506	29613	0.013	44.6
Scaffold_10518	NC_017972	66.038	159	45	1	3387	3536	194302	194144	0.001	48.2
Scaffold_10518	NC_017972	88.571	35	4	0	3621	3655	188802	188768	0.004	46.4
Scaffold_10518	NC_017972	72.727	77	21	0	3496	3572	194220	194144	0.013	44.6
Scaffold_10518	KF296717	93.103	29	2	0	3	31	42344	42372	0.013	44.6
Scaffold_10523	NC_019401	87.179	39	3	1	773	811	346733	346697	0.002	46.4
Scaffold_10524	NC_017980	78.333	60	10	2	221	280	10292	10236	0.002	44.6
Scaffold_10527	NC_023595	86.486	37	3	1	2787	2821	36485	36449	0.043	42.8
Scaffold_1053	AP013397	87.805	41	5	0	15374	15414	27130	27090	0.000547	51.8
Scaffold_10531	6.66667e+06	87.5	32	4	0	516	547	17783	17752	0.037	41
Scaffold_10533	NC_005822	78.846	52	8	1	805	853	6457	6508	0.023	42.8
Scaffold_10533	DQ394807	78.846	52	8	1	805	853	8576	8627	0.023	42.8
Scaffold_10533	DQ394806	78.846	52	8	1	805	853	8576	8627	0.023	42.8
Scaffold_10537	NC_018861	79.688	64	11	2	271	334	28927	28988	8.55e-05	50
Scaffold_10537	NC_018861	78.846	52	8	1	275	323	47685	47736	0.013	42.8
Scaffold_10537	NC_016562	83.333	48	5	1	268	312	698	745	8.55e-05	50
Scaffold_10537	NC_016562	79.688	64	11	2	271	334	114883	114944	8.55e-05	50
Scaffold_10537	NC_015464	83.333	48	5	1	268	312	44556	44603	8.55e-05	50
Scaffold_10537	NC_015464	82	50	8	1	271	320	26079	26127	0.001	46.4
Scaffold_10537	KF148616	83.333	48	5	1	268	312	931	978	8.55e-05	50
Scaffold_10537	KF148616	79.688	64	11	2	271	334	115119	115180	8.55e-05	50
Scaffold_10537	FR823450	79.688	64	11	2	271	334	13801	13740	8.55e-05	50
Scaffold_10537	FR823450	83.333	48	5	1	268	312	127778	127731	8.55e-05	50
Scaffold_10537	NC_022769	93.75	32	1	1	639	670	36895	36865	0.001	46.4
Scaffold_10537	NC_022763	93.75	32	1	1	639	670	37953	37923	0.001	46.4
Scaffold_10537	KJ489402	93.75	32	1	1	639	670	34479	34449	0.001	46.4
Scaffold_10537	6.66667e+06	93.75	32	1	1	639	670	153579	153609	0.001	46.4
Scaffold_1054	KC595511	71.569	408	87	9	3831	4225	66486	66095	1.2e-48	199
Scaffold_1054	KC595511	77.215	79	18	0	1250	1328	10417	10495	2.18e-07	62.6
Scaffold_1054	KC595511	96.429	28	1	0	7635	7662	59858	59831	0.017	46.4
Scaffold_1054	NC_023719	90.123	81	8	0	659	739	58659	58739	4.8e-22	111
Scaffold_1054	NC_023719	80.247	81	15	1	213	292	410917	410997	4.21e-10	71.6
Scaffold_1054	NC_023719	85.455	55	8	0	1256	1310	411009	411063	6.25e-08	64.4
Scaffold_1054	NC_023719	84.906	53	8	0	1425	1477	58590	58642	7.61e-07	60.8
Scaffold_1054	NC_023719	79.688	64	11	2	409	471	411938	412000	0.001	50
Scaffold_1054	NC_023719	69.93	143	34	6	828	968	59284	59419	0.017	46.4
Scaffold_1054	NC_023719	72.5	80	22	0	482	561	59296	59375	0.017	46.4
Scaffold_1054	KF296717	69.123	285	73	7	3856	4134	8976	9251	8.68e-19	100
Scaffold_1054	NC_021072	88.889	72	8	0	217	288	35582	35511	3.69e-17	95.1
Scaffold_1054	NC_021072	84.375	64	9	1	221	283	71479	71416	5.13e-09	68
Scaffold_1054	NC_021072	83.333	60	10	0	480	539	35896	35837	6.25e-08	64.4
Scaffold_1054	HQ317290	87.838	74	9	0	215	288	18127	18200	1.29e-16	93.3
Scaffold_1054	HQ317290	79.688	64	12	1	486	549	13798	13860	0.000113	53.6
Scaffold_1054	HQ317290	79.688	64	12	1	221	283	161243	161306	0.000113	53.6
Scaffold_1054	DQ004855	87.671	73	9	0	1250	1322	127544	127472	4.5e-16	91.5
Scaffold_1054	NC_023688	86.25	80	9	2	1251	1329	94012	93934	5.48e-15	87.8
Scaffold_1054	NC_023688	84.848	66	9	1	406	470	94966	94901	4.21e-10	71.6
Scaffold_1054	NC_023688	73.418	79	21	0	1499	1577	93258	93180	0.005	48.2
Scaffold_1054	NC_023688	79.31	58	10	1	840	897	95844	95789	0.005	48.2
Scaffold_1054	NC_014636	84.81	79	11	1	1251	1328	191391	191313	1.91e-14	86
Scaffold_1054	NC_014636	82.143	84	11	4	479	560	193090	193009	1.47e-09	69.8
Scaffold_1054	NC_014636	82.54	63	11	0	419	481	193839	193777	6.25e-08	64.4
Scaffold_1054	NC_014636	74.737	95	23	1	449	542	194812	194718	7.61e-07	60.8
Scaffold_1054	NC_014636	80.769	52	10	0	15738	15789	192993	192942	0.001	50
Scaffold_1054	NC_014636	74.359	78	19	1	1500	1577	190046	189970	0.005	48.2
Scaffold_1054	NC_014636	77.778	63	12	1	840	902	191936	191876	0.005	48.2
Scaffold_1054	NC_014636	93.333	30	2	0	1064	1093	191971	191942	0.017	46.4
Scaffold_1054	KJ743987	85.333	75	11	0	584	658	21150	21224	1.91e-14	86
Scaffold_1054	NC_019406	84.211	76	12	0	583	658	132963	133038	6.67e-14	84.2
Scaffold_1054	NC_019406	73.333	150	31	8	412	557	62409	62553	2.18e-07	62.6
Scaffold_1054	JN797798	92.727	55	4	0	754	808	148792	148738	2.33e-13	82.4
Scaffold_1054	JN797798	80.519	77	15	0	838	914	150028	149952	4.21e-10	71.6
Scaffold_1054	JN797798	84	50	7	1	1257	1306	149333	149285	0.000394	51.8
Scaffold_1054	NC_022096	83.117	77	13	0	841	917	120228	120304	8.13e-13	80.6
Scaffold_1054	NC_022096	73.494	166	35	7	403	564	122690	122850	2.84e-12	78.8
Scaffold_1054	NC_022096	69.595	148	36	3	662	808	122690	122829	2.66e-06	59
Scaffold_1054	NC_022096	78.082	73	14	2	489	560	120235	120306	0.000113	53.6
Scaffold_1054	NC_015279	82.051	78	14	0	215	292	141253	141330	2.84e-12	78.8
Scaffold_1054	NC_015279	81.081	74	14	0	15729	15802	141030	141103	4.21e-10	71.6
Scaffold_1054	NC_015279	82.456	57	9	1	848	903	140961	141017	3.24e-05	55.4
Scaffold_1054	NC_015279	81.667	60	10	1	488	547	141337	141395	3.24e-05	55.4
Scaffold_1054	NC_015279	78.462	65	12	1	221	283	140958	141022	0.000394	51.8
Scaffold_1054	JQ347801	81.818	77	14	0	841	917	23482	23558	9.9e-12	77
Scaffold_1054	NC_023717	81.579	76	14	0	841	916	148134	148209	3.46e-11	75.2
Scaffold_1054	NC_023717	79.221	77	14	1	432	506	149942	150018	6.25e-08	64.4
Scaffold_1054	NC_023717	80.769	78	10	4	847	921	149375	149450	7.61e-07	60.8
Scaffold_1054	NC_023717	75.61	82	20	0	479	560	148131	148212	2.66e-06	59
Scaffold_1054	NC_023717	78.571	70	15	0	753	822	150956	151025	2.66e-06	59
Scaffold_1054	NC_023717	70.796	113	20	4	752	864	150162	150261	0.001	50
Scaffold_1054	NC_023549	81.579	76	14	0	583	658	50183	50108	3.46e-11	75.2
Scaffold_1054	NC_022052	85.938	64	9	0	839	902	66072	66009	3.46e-11	75.2
Scaffold_1054	NC_022052	83.929	56	9	0	847	902	64723	64778	7.61e-07	60.8
Scaffold_1054	NC_004305	84.848	66	10	0	15731	15796	2594	2659	3.46e-11	75.2
Scaffold_1054	HQ630627	86.111	72	7	3	848	917	294930	294860	3.46e-11	75.2
Scaffold_1054	HQ630627	75.342	73	17	1	489	560	294930	294858	0.005	48.2
Scaffold_1054	NC_020081	90.566	53	5	0	752	804	122120	122068	1.21e-10	73.4
Scaffold_1054	NC_012663	82.192	73	13	0	841	913	59802	59730	1.21e-10	73.4
Scaffold_1054	KM051843	86.667	60	8	0	752	811	132367	132308	1.21e-10	73.4
Scaffold_1054	NC_024137	86.885	61	7	1	223	282	31018	31078	4.21e-10	71.6
Scaffold_1054	NC_024137	83.333	54	8	1	1045	1097	32869	32922	0.000113	53.6
Scaffold_1054	NC_024137	78.571	56	12	0	753	808	31018	31073	0.005	48.2
Scaffold_1054	NC_012697	81.013	79	14	1	744	822	73690	73767	4.21e-10	71.6
Scaffold_1054	NC_011273	85.484	62	9	0	583	644	92615	92676	4.21e-10	71.6
Scaffold_1054	NC_011273	86	50	6	1	425	473	94286	94335	3.24e-05	55.4
Scaffold_1054	NC_005260	84.848	66	9	1	406	470	108375	108310	4.21e-10	71.6
Scaffold_1054	NC_005260	80.723	83	14	2	479	560	110572	110491	4.21e-10	71.6
Scaffold_1054	NC_005260	84.314	51	7	1	848	898	108078	108029	0.000113	53.6
Scaffold_1054	NC_005260	74.194	93	19	3	1239	1328	107320	107230	0.000394	51.8
Scaffold_1054	NC_005260	93.75	32	2	0	1373	1404	96415	96384	0.001	50
Scaffold_1054	NC_005260	77.419	62	14	0	583	644	108281	108220	0.001	50
Scaffold_1054	AP013476	91.837	49	4	0	612	660	26692	26740	4.21e-10	71.6
Scaffold_1054	NC_011222	75.758	99	23	1	4038	4136	28725	28822	5.13e-09	68
Scaffold_1054	GQ478087	75.789	95	23	0	4042	4136	3511	3605	5.13e-09	68
Scaffold_1054	GQ478085	75.789	95	23	0	4042	4136	3511	3605	5.13e-09	68
Scaffold_1054	GQ478082	75.789	95	23	0	4042	4136	3515	3609	5.13e-09	68
Scaffold_1054	NC_023561	78.947	76	16	0	841	916	72179	72104	1.79e-08	66.2
Scaffold_1054	NC_019516	81.69	71	12	1	479	549	28877	28946	1.79e-08	66.2
Scaffold_1054	NC_019516	82.143	56	9	1	848	902	17055	17110	0.000113	53.6
Scaffold_1054	NC_011041	85.714	56	8	0	848	903	62208	62153	1.79e-08	66.2
Scaffold_1054	NC_008720	78.947	76	16	0	841	916	32625	32700	1.79e-08	66.2
Scaffold_1054	NC_008720	81.818	55	10	0	223	277	32457	32511	3.24e-05	55.4
Scaffold_1054	NC_008720	72.941	85	23	0	453	537	32596	32680	0.001	50
Scaffold_1054	NC_003315	77.381	84	19	0	747	830	433	350	1.79e-08	66.2
Scaffold_1054	NC_001697	77.381	84	19	0	747	830	431	348	1.79e-08	66.2
Scaffold_1054	6.66667e+06	79.73	74	15	0	583	656	92710	92783	1.79e-08	66.2
Scaffold_1054	6.66667e+06	78.667	75	15	1	1329	1402	96766	96840	7.61e-07	60.8
Scaffold_1054	6.66667e+06	78.571	56	12	0	848	903	93926	93981	0.005	48.2
Scaffold_1054	NC_016158	82.54	63	11	0	221	283	44367	44429	6.25e-08	64.4
Scaffold_1054	NC_015282	80.882	68	13	0	487	554	19491	19558	6.25e-08	64.4
Scaffold_1054	NC_015282	80	60	12	0	847	906	19492	19551	3.24e-05	55.4
Scaffold_1054	NC_015282	81.818	55	8	2	224	277	15020	15073	0.005	48.2
Scaffold_1054	NC_015282	78.571	56	12	0	848	903	160623	160678	0.005	48.2
Scaffold_1054	NC_015282	76.19	63	15	0	215	277	19606	19668	0.017	46.4
Scaffold_1054	NC_015251	78.75	80	16	1	479	557	113817	113896	6.25e-08	64.4
Scaffold_1054	NC_015251	83.333	60	10	0	668	727	115262	115321	6.25e-08	64.4
Scaffold_1054	NC_011645	88	50	6	0	3856	3905	27696	27745	6.25e-08	64.4
Scaffold_1054	NC_011645	73.394	109	28	1	4036	4143	27867	27975	2.18e-07	62.6
Scaffold_1054	NC_006565	93.333	45	2	1	846	889	54061	54017	6.25e-08	64.4
Scaffold_1054	KC954775	85.455	55	8	0	848	902	122734	122788	6.25e-08	64.4
Scaffold_1054	KC954775	76.404	89	18	3	1008	1094	122982	123069	3.24e-05	55.4
Scaffold_1054	KC954775	81.818	55	7	2	15760	15812	122125	122178	0.005	48.2
Scaffold_1054	NC_024205	83.607	61	9	1	223	282	32375	32435	2.18e-07	62.6
Scaffold_1054	NC_024205	84.211	57	9	0	1257	1313	32455	32511	2.18e-07	62.6
Scaffold_1054	NC_021529	80.769	78	12	3	485	560	227389	227313	2.18e-07	62.6
Scaffold_1054	NC_021529	78.378	74	15	1	1113	1186	225118	225046	2.66e-06	59
Scaffold_1054	NC_021529	81.481	54	10	0	848	901	227384	227331	0.000113	53.6
Scaffold_1054	NC_019529	77.778	81	17	1	479	558	40769	40849	2.18e-07	62.6
Scaffold_1054	NC_019529	76.667	60	14	0	844	903	40434	40493	0.017	46.4
Scaffold_1054	NC_017974	71.429	154	34	6	656	804	146566	146714	2.18e-07	62.6
Scaffold_1054	NC_017974	84.211	57	8	1	847	902	145610	145666	2.66e-06	59
Scaffold_1054	NC_017974	71.681	113	26	3	449	557	146622	146732	0.000394	51.8
Scaffold_1054	NC_017974	81.356	59	8	2	1296	1352	146851	146908	0.000394	51.8
Scaffold_1054	NC_017974	73.171	82	22	0	479	560	144369	144450	0.001	50
Scaffold_1054	NC_015289	82.812	64	10	1	221	283	161703	161766	2.18e-07	62.6
Scaffold_1054	NC_015289	81.818	55	10	0	489	543	161706	161760	3.24e-05	55.4
Scaffold_1054	NC_015289	80.702	57	10	1	847	902	19475	19531	0.001	50
Scaffold_1054	NC_015289	82.143	56	6	3	224	277	15320	15373	0.017	46.4
Scaffold_1054	NC_004629	70.548	146	37	3	677	819	271883	271741	2.18e-07	62.6
Scaffold_1054	NC_019503	83.929	56	9	0	847	902	69448	69393	7.61e-07	60.8
Scaffold_1054	NC_019503	73.333	90	23	1	15724	15813	69716	69628	0.000394	51.8
Scaffold_1054	NC_019503	78.333	60	13	0	488	547	69448	69389	0.001	50
Scaffold_1054	NC_019411	83.929	56	9	0	753	808	51072	51127	7.61e-07	60.8
Scaffold_1054	NC_019411	80	65	11	1	582	644	103075	103139	9.27e-06	57.2
Scaffold_1054	NC_019399	83.929	56	9	0	847	902	68636	68581	7.61e-07	60.8
Scaffold_1054	NC_019399	78.333	60	13	0	488	547	68636	68577	0.001	50
Scaffold_1054	NC_018861	82.759	58	10	0	222	279	89027	88970	7.61e-07	60.8
Scaffold_1054	NC_016658	78.082	73	16	0	15729	15801	3551	3479	7.61e-07	60.8
Scaffold_1054	NC_016562	82.759	58	10	0	222	279	39024	38967	7.61e-07	60.8
Scaffold_1054	NC_016562	73.171	82	20	1	577	658	38872	38793	0.017	46.4
Scaffold_1054	NC_015287	81.967	61	11	0	15730	15790	151562	151622	7.61e-07	60.8
Scaffold_1054	NC_015287	82.456	57	9	1	847	902	216503	216559	3.24e-05	55.4
Scaffold_1054	NC_015287	82.456	57	9	1	848	903	216582	216638	3.24e-05	55.4
Scaffold_1054	NC_015287	73.418	79	19	1	221	297	216579	216657	0.017	46.4
Scaffold_1054	NC_006820	86.275	51	7	0	416	466	118995	119045	7.61e-07	60.8
Scaffold_1054	NC_006820	80	65	13	0	580	644	164822	164886	2.66e-06	59
Scaffold_1054	NC_006820	78.667	75	14	2	401	473	118849	118923	9.27e-06	57.2
Scaffold_1054	NC_006820	80.357	56	10	1	1117	1172	119469	119523	0.005	48.2
Scaffold_1054	NC_006820	75.342	73	17	1	15730	15801	122999	123071	0.005	48.2
Scaffold_1054	NC_006820	73.973	73	19	0	1329	1401	122999	123071	0.017	46.4
Scaffold_1054	NC_006820	78.182	55	12	0	848	902	165152	165206	0.017	46.4
Scaffold_1054	KF148616	82.759	58	10	0	222	279	39258	39201	7.61e-07	60.8
Scaffold_1054	KF148616	73.171	82	20	1	577	658	39106	39027	0.017	46.4
Scaffold_1054	JX163858	83.929	56	9	0	753	808	156017	155962	7.61e-07	60.8
Scaffold_1054	JX163858	80	65	11	1	582	644	104033	103969	9.27e-06	57.2
Scaffold_1054	JX128259	83.929	56	9	0	847	902	68819	68764	7.61e-07	60.8
Scaffold_1054	JX128259	78.333	60	13	0	488	547	68819	68760	0.001	50
Scaffold_1054	JX128259	72.941	85	23	0	15724	15808	69662	69578	0.001	50
Scaffold_1054	FR823450	82.759	58	10	0	222	279	89451	89508	7.61e-07	60.8
Scaffold_1054	FR823450	73.171	82	20	1	577	658	89603	89682	0.017	46.4
Scaffold_1054	AP013416	82.759	58	10	0	1347	1404	4967	4910	7.61e-07	60.8
Scaffold_1054	AP013416	94.286	35	2	0	15773	15807	4941	4907	3.24e-05	55.4
Scaffold_1054	AP013413	82.759	58	10	0	1347	1404	36585	36642	7.61e-07	60.8
Scaffold_1054	AP013413	94.286	35	2	0	15773	15807	36611	36645	3.24e-05	55.4
Scaffold_1054	NC_019919	77.381	84	17	2	1273	1354	30140	30057	2.66e-06	59
Scaffold_1054	NC_019913	81.159	69	11	2	835	903	21959	22025	2.66e-06	59
Scaffold_1054	NC_019408	78.378	74	14	1	582	653	103047	103120	2.66e-06	59
Scaffold_1054	NC_018837	79.167	72	14	1	846	916	35232	35161	2.66e-06	59
Scaffold_1054	NC_018837	75.949	79	17	2	831	907	39863	39785	0.001	50
Scaffold_1054	NC_018837	78.571	56	12	0	848	903	27002	26947	0.005	48.2
Scaffold_1054	NC_015464	82.456	57	10	0	222	278	86216	86160	2.66e-06	59
Scaffold_1054	NC_015283	81.25	64	11	1	221	283	165841	165904	2.66e-06	59
Scaffold_1054	NC_010583	77.381	84	17	2	1273	1354	31144	31061	2.66e-06	59
Scaffold_1054	NC_010583	74.419	86	18	2	1503	1588	32622	32541	0.000394	51.8
Scaffold_1054	NC_008296	80	65	13	0	213	277	20222	20286	2.66e-06	59
Scaffold_1054	NC_008296	82.143	56	6	3	224	277	15980	16033	0.017	46.4
Scaffold_1054	AP013450	90.476	42	4	0	430	471	2261	2220	2.66e-06	59
Scaffold_1054	AP013446	90.476	42	4	0	430	471	11584	11625	2.66e-06	59
Scaffold_1054	6.66667e+06	82.456	57	10	0	847	903	62250	62306	2.66e-06	59
Scaffold_1054	6.66667e+06	83.333	54	9	0	848	901	64889	64836	9.27e-06	57.2
Scaffold_1054	NC_023557	77.632	76	16	1	1250	1324	165191	165266	9.27e-06	57.2
Scaffold_1054	NC_023557	78.182	55	12	0	754	808	165198	165252	0.017	46.4
Scaffold_1054	NC_022767	78.788	66	14	0	4158	4223	74192	74257	9.27e-06	57.2
Scaffold_1054	NC_022058	81.356	59	11	0	223	281	4027	4085	9.27e-06	57.2
Scaffold_1054	NC_022058	78.571	56	12	0	753	808	4245	4300	0.005	48.2
Scaffold_1054	NC_020837	80	70	12	2	487	555	74198	74130	9.27e-06	57.2
Scaffold_1054	NC_020837	75.342	73	18	0	15729	15801	106217	106145	0.000394	51.8
Scaffold_1054	NC_015569	78.788	66	14	0	579	644	149445	149510	9.27e-06	57.2
Scaffold_1054	NC_015569	79.661	59	12	0	223	281	131722	131780	0.000113	53.6
Scaffold_1054	NC_015294	82.143	56	10	0	848	903	91631	91686	9.27e-06	57.2
Scaffold_1054	NC_015294	78.125	64	13	1	848	910	92511	92574	0.001	50
Scaffold_1054	NC_015263	84.314	51	8	0	669	719	44850	44900	9.27e-06	57.2
Scaffold_1054	NC_015250	76.543	81	18	1	212	291	68304	68224	9.27e-06	57.2
Scaffold_1054	NC_015250	80.357	56	11	0	848	903	69808	69753	0.000394	51.8
Scaffold_1054	NC_015250	84	50	5	2	15760	15807	69701	69653	0.005	48.2
Scaffold_1054	NC_009234	88.636	44	5	0	779	822	7984	8027	9.27e-06	57.2
Scaffold_1054	NC_008203	81.356	59	11	0	223	281	4030	4088	9.27e-06	57.2
Scaffold_1054	NC_008203	79.104	67	13	1	747	813	4242	4307	3.24e-05	55.4
Scaffold_1054	NC_002484	75.309	81	20	0	837	917	54142	54222	9.27e-06	57.2
Scaffold_1054	KF554508	79.412	68	13	1	1019	1085	1435	1502	9.27e-06	57.2
Scaffold_1054	KF554508	79.661	59	11	1	846	903	103	161	0.001	50
Scaffold_1054	KC595512	86.957	46	6	0	235	280	32902	32947	9.27e-06	57.2
Scaffold_1054	JX681814	88.636	44	5	0	779	822	34799	34756	9.27e-06	57.2
Scaffold_1054	JN831654	80.303	66	12	1	220	284	4073	4138	9.27e-06	57.2
Scaffold_1054	JN831654	78.571	56	12	0	753	808	4076	4131	0.005	48.2
Scaffold_1054	AP013367	100	31	0	0	754	784	2370	2340	9.27e-06	57.2
Scaffold_1054	233894	82.143	56	10	0	489	544	64465	64410	9.27e-06	57.2
Scaffold_1054	233894	78.182	55	12	0	605	659	62929	62875	0.017	46.4
Scaffold_1054	NC_023587	82.456	57	9	1	847	902	19405	19461	3.24e-05	55.4
Scaffold_1054	NC_023587	78.125	64	13	1	486	549	152669	152731	0.001	50
Scaffold_1054	NC_023587	85.366	41	6	0	15730	15770	155267	155307	0.005	48.2
Scaffold_1054	NC_022343	83.636	55	8	1	1256	1310	83798	83745	3.24e-05	55.4
Scaffold_1054	NC_019521	80.645	62	11	1	847	907	1604	1665	3.24e-05	55.4
Scaffold_1054	NC_013085	83.019	53	9	0	487	539	176373	176321	3.24e-05	55.4
Scaffold_1054	NC_013085	73.196	97	21	2	1322	1417	29539	29447	0.000113	53.6
Scaffold_1054	NC_013085	75.342	73	16	1	221	291	32081	32009	0.005	48.2
Scaffold_1054	NC_013085	80.357	56	10	1	848	902	176448	176393	0.005	48.2
Scaffold_1054	NC_013085	78.947	57	11	1	848	903	32078	32022	0.017	46.4
Scaffold_1054	NC_011811	81.818	55	10	0	848	902	22242	22296	3.24e-05	55.4
Scaffold_1054	NC_001900	80	60	12	0	223	282	4224	4283	3.24e-05	55.4
Scaffold_1054	KC661276	80	60	12	0	847	906	64978	65037	3.24e-05	55.4
Scaffold_1054	HQ728263	81.818	55	10	0	848	902	5217	5271	3.24e-05	55.4
Scaffold_1054	HQ317385	77.922	77	15	2	1330	1405	13713	13788	3.24e-05	55.4
Scaffold_1054	HQ317385	80.702	57	10	1	848	903	153732	153788	0.001	50
Scaffold_1054	HQ317385	80.357	56	10	1	848	902	19103	19158	0.005	48.2
Scaffold_1054	HM137666	80	60	12	0	488	547	72082	72023	3.24e-05	55.4
Scaffold_1054	HM137666	73.333	90	23	1	15724	15813	72349	72261	0.000394	51.8
Scaffold_1054	HM137666	77.586	58	13	0	754	811	72081	72024	0.017	46.4
Scaffold_1054	HE956711	80	60	12	0	488	547	69211	69152	3.24e-05	55.4
Scaffold_1054	HE956711	73.333	90	23	1	15724	15813	69480	69392	0.000394	51.8
Scaffold_1054	AP011113	80	60	12	0	488	547	68922	68863	3.24e-05	55.4
Scaffold_1054	AP011113	72.941	85	23	0	15724	15808	69765	69681	0.001	50
Scaffold_1054	AP011113	77.586	58	13	0	754	811	68921	68864	0.017	46.4
Scaffold_1054	NC_022965	79.661	59	12	0	223	281	5408	5466	0.000113	53.6
Scaffold_1054	NC_021307	80.328	61	11	1	223	282	1874	1934	0.000113	53.6
Scaffold_1054	NC_019714	73.81	84	22	0	834	917	35170	35253	0.000113	53.6
Scaffold_1054	NC_019526	77.027	74	16	1	842	914	182046	182119	0.000113	53.6
Scaffold_1054	NC_015288	79.688	64	12	1	486	549	163578	163640	0.000113	53.6
Scaffold_1054	NC_015285	79.688	64	12	1	486	549	14338	14400	0.000113	53.6
Scaffold_1054	NC_015285	78.947	57	11	1	848	903	158989	159045	0.017	46.4
Scaffold_1054	KF381361	76.923	78	16	2	583	659	95632	95708	0.000113	53.6
Scaffold_1054	KF381361	71.287	101	21	3	985	1077	95682	95782	0.017	46.4
Scaffold_1054	JX006077	76.389	72	17	0	1418	1489	65390	65319	0.000113	53.6
Scaffold_1054	6.66667e+06	79.661	59	12	0	223	281	5409	5467	0.000113	53.6
Scaffold_1054	6.66667e+06	79.661	59	12	0	223	281	5402	5460	0.000113	53.6
Scaffold_1054	NC_023007	75.342	73	18	0	223	295	150647	150575	0.000394	51.8
Scaffold_1054	NC_023007	80	55	11	0	1025	1079	150494	150440	0.001	50
Scaffold_1054	NC_023007	78.571	56	12	0	15738	15793	149267	149212	0.005	48.2
Scaffold_1054	NC_021861	81.132	53	10	0	3703	3755	1452	1504	0.000394	51.8
Scaffold_1054	NC_021856	82.353	51	9	0	416	466	35525	35575	0.000394	51.8
Scaffold_1054	NC_019450	80.357	56	11	0	848	903	23771	23826	0.000394	51.8
Scaffold_1054	NC_012696	76.056	71	17	0	752	822	72525	72595	0.000394	51.8
Scaffold_1054	NC_007623	75.325	77	17	1	820	896	102927	103001	0.000394	51.8
Scaffold_1054	AP013477	83.333	48	8	0	775	822	5631	5678	0.000394	51.8
Scaffold_1054	6.66667e+06	73.333	90	23	1	15724	15813	68499	68411	0.000394	51.8
Scaffold_1054	NC_024125	78.333	60	13	0	488	547	56820	56761	0.001	50
Scaffold_1054	NC_017985	74.026	77	20	0	841	917	20271	20347	0.001	50
Scaffold_1054	NC_017969	81.034	58	8	2	848	902	31317	31260	0.001	50
Scaffold_1054	NC_016650	80	55	11	0	848	902	46650	46704	0.001	50
Scaffold_1054	NC_015266	84.444	45	7	0	873	917	2	46	0.001	50
Scaffold_1054	NC_014663	81.481	54	9	1	754	807	79023	78971	0.001	50
Scaffold_1054	NC_014663	69.106	123	27	3	751	873	79941	79830	0.005	48.2
Scaffold_1054	NC_014663	69.531	128	28	4	754	880	80023	79906	0.005	48.2
Scaffold_1054	NC_014663	75.362	69	17	0	848	916	80023	79955	0.005	48.2
Scaffold_1054	NC_014663	78.182	55	12	0	848	902	79671	79617	0.017	46.4
Scaffold_1054	NC_014663	83.333	60	5	5	224	280	80023	79966	0.017	46.4
Scaffold_1054	NC_013021	91.429	35	3	0	609	643	90871	90837	0.001	50
Scaffold_1054	NC_010105	80	55	11	0	223	277	70354	70300	0.001	50
Scaffold_1054	NC_009816	78.947	57	12	0	752	808	50604	50548	0.001	50
Scaffold_1054	NC_005344	74.026	77	20	0	841	917	36145	36221	0.001	50
Scaffold_1054	NC_023574	80.392	51	10	0	669	719	51221	51271	0.005	48.2
Scaffold_1054	NC_022771	80.392	51	10	0	416	466	33049	33099	0.005	48.2
Scaffold_1054	NC_021536	78.571	56	12	0	848	903	147060	147115	0.005	48.2
Scaffold_1054	NC_021536	82.143	56	6	3	224	277	4938	4991	0.017	46.4
Scaffold_1054	NC_020879	87.179	39	5	0	841	879	63896	63858	0.005	48.2
Scaffold_1054	NC_018087	80.357	56	10	1	847	901	76015	75960	0.005	48.2
Scaffold_1054	NC_015286	79.63	54	11	0	224	277	22561	22614	0.005	48.2
Scaffold_1054	NC_015286	82.143	56	6	3	224	277	17796	17849	0.017	46.4
Scaffold_1054	NC_014661	74.118	85	20	2	208	291	80118	80035	0.005	48.2
Scaffold_1054	NC_014036	78.571	56	12	0	846	901	49406	49461	0.005	48.2
Scaffold_1054	NC_001978	78.333	60	11	1	489	546	40709	40768	0.005	48.2
Scaffold_1054	KJ936628	78.571	56	12	0	848	903	29775	29720	0.005	48.2
Scaffold_1054	KJ920400	67.91	134	43	0	3863	3996	13757	13624	0.005	48.2
Scaffold_1054	KF017927	78.571	56	12	0	753	808	4248	4303	0.005	48.2
Scaffold_1054	KF017927	78.333	60	12	1	223	281	4136	4195	0.017	46.4
Scaffold_1054	JX509734	72.619	84	23	0	834	917	35811	35894	0.005	48.2
Scaffold_1054	JX306041	87.179	39	5	0	841	879	66813	66775	0.005	48.2
Scaffold_1054	JN849462	74.713	87	19	3	207	291	177813	177728	0.005	48.2
Scaffold_1054	AP013455	91.176	34	3	0	848	881	7534	7501	0.005	48.2
Scaffold_1054	AP013398	80.769	52	7	1	738	786	3578	3629	0.005	48.2
Scaffold_1054	AP011616	78.689	61	12	1	844	903	120185	120125	0.005	48.2
Scaffold_1054	6.66667e+06	78.571	56	12	0	848	903	93219	93274	0.005	48.2
Scaffold_1054	NC_023579	78.182	55	12	0	848	902	41260	41314	0.017	46.4
Scaffold_1054	NC_023571	82.222	45	8	0	1500	1544	1	45	0.017	46.4
Scaffold_1054	NC_023560	82.222	45	8	0	1500	1544	1	45	0.017	46.4
Scaffold_1054	NC_023559	82.222	45	8	0	1500	1544	1	45	0.017	46.4
Scaffold_1054	NC_021788	77.419	62	13	1	222	282	90634	90695	0.017	46.4
Scaffold_1054	NC_021788	78.182	55	12	0	848	902	143240	143294	0.017	46.4
Scaffold_1054	NC_019929	74.118	85	16	3	1017	1097	167024	167106	0.017	46.4
Scaffold_1054	NC_016571	76.389	72	15	2	748	817	16901	16830	0.017	46.4
Scaffold_1054	NC_009815	93.75	32	1	1	13605	13636	22018	22048	0.017	46.4
Scaffold_1054	NC_009812	93.75	32	1	1	13605	13636	23482	23512	0.017	46.4
Scaffold_1054	KJ473422	78.182	55	12	0	1025	1079	62407	62461	0.017	46.4
Scaffold_1054	JX262376	77.586	58	13	0	751	808	1087	1144	0.017	46.4
Scaffold_1054	JX015524	78.182	55	12	0	848	902	4062	4116	0.017	46.4
Scaffold_1054	JQ684677	75.362	69	15	1	848	914	4138	4206	0.017	46.4
Scaffold_1054	JF957060	78.182	55	12	0	848	902	5381	5435	0.017	46.4
Scaffold_1054	HE983844	75	72	17	1	223	293	559	630	0.017	46.4
Scaffold_1054	AP013399	87.179	39	3	1	749	785	13800	13838	0.017	46.4
Scaffold_1054	AP013385	87.179	39	3	1	749	785	25442	25404	0.017	46.4
Scaffold_1054	6.66667e+06	75.676	74	11	3	223	292	3844	3914	0.017	46.4
Scaffold_1054	6.66667e+06	75.362	69	15	1	848	914	4316	4384	0.017	46.4
Scaffold_10541	NC_005262	84.783	46	7	0	438	483	10523	10478	1.61e-05	51.8
Scaffold_10541	AB981169	78.947	57	7	2	390	446	27073	27124	0.002	44.6
Scaffold_10541	NC_016652	100	23	0	0	370	392	42086	42108	0.008	42.8
Scaffold_10541	6.66667e+06	100	22	0	0	264	285	7958	7979	0.029	41
Scaffold_10544	NC_011042	87.879	33	4	0	2504	2536	29860	29892	0.035	42.8
Scaffold_10544	JQ309827	84.211	38	6	0	751	788	14083	14120	0.035	42.8
Scaffold_10548	NC_023568	85.106	47	6	1	438	483	33433	33387	0.000343	50
Scaffold_1055	NC_001884	85.714	42	4	2	126	166	40313	40353	0.009	42.8
Scaffold_1055	KF296717	96.154	26	1	0	1	26	42409	42434	0.009	42.8
Scaffold_10552	KF767351	85	40	5	1	3006	3044	33432	33471	0.043	42.8
Scaffold_10552	AY583235	81.395	43	8	0	3251	3293	112	154	0.043	42.8
Scaffold_10555	NC_018085	88.462	988	113	1	1	987	17710	18697	0	1265
Scaffold_10555	KJ920400	87.335	987	125	0	1	987	27544	26558	0	1216
Scaffold_10555	HE614282	87.335	987	125	0	1	987	19099	20085	0	1216
Scaffold_10555	NC_019502	70.199	151	35	5	1114	1259	36920	37065	8.99e-07	57.2
Scaffold_10555	NC_023599	71.569	102	22	4	1114	1212	19430	19527	0.02	42.8
Scaffold_10561	NC_023559	90.323	31	3	0	1350	1380	45345	45315	0.018	42.8
Scaffold_10562	DQ222855	68.844	735	192	17	967	1677	19214	19935	7.87e-65	250
Scaffold_10562	NC_019502	79.581	191	39	0	1340	1530	41205	41395	2.11e-40	168
Scaffold_10562	NC_019502	67.429	175	56	1	1072	1245	40915	41089	3.36e-06	55.4
Scaffold_10562	HE614282	91.176	34	3	0	49	82	37820	37853	0.000498	48.2
Scaffold_10562	NC_011167	93.333	30	2	0	53	82	13435	13464	0.002	46.4
Scaffold_10562	GU229986	93.333	30	2	0	53	82	52107	52136	0.002	46.4
Scaffold_10562	NC_018272	87.879	33	4	0	175	207	16023	16055	0.021	42.8
Scaffold_10563	AP013481	86.842	38	3	1	168	205	14913	14948	0.004	44.6
Scaffold_10563	AP013403	100	22	0	0	304	325	32700	32721	0.049	41
Scaffold_10565	NC_019529	75.269	93	20	3	262	353	45497	45587	9.57e-05	53.6
Scaffold_10565	KJ567043	78.462	65	8	3	269	331	39127	39187	0.014	46.4
Scaffold_10565	NC_021806	88.235	34	4	0	13683	13716	18597	18630	0.05	44.6
Scaffold_10565	NC_020872	86.486	37	5	0	266	302	1068	1032	0.05	44.6
Scaffold_10565	NC_019401	76.389	72	13	3	269	338	301100	301169	0.05	44.6
Scaffold_10565	NC_016564	70.787	89	26	0	4683	4771	18908	18996	0.05	44.6
Scaffold_1057	NC_023500	88.889	36	3	1	2240	2275	38636	38602	0.011	44.6
Scaffold_1057	NC_021326	88.889	36	3	1	2240	2275	6045	6079	0.011	44.6
Scaffold_1057	NC_010808	88.889	36	3	1	2240	2275	40557	40523	0.011	44.6
Scaffold_1057	NC_008799	88.889	36	3	1	2240	2275	40013	39979	0.011	44.6
Scaffold_1057	NC_008798	88.889	36	3	1	2240	2275	39996	39962	0.011	44.6
Scaffold_1057	NC_007060	88.889	36	3	1	2240	2275	22922	22888	0.011	44.6
Scaffold_1057	NC_003288	88.889	36	3	1	2240	2275	39812	39778	0.011	44.6
Scaffold_1057	JX274646	88.889	36	3	1	2240	2275	40629	40595	0.011	44.6
Scaffold_10570	AP013554	100	24	0	0	4134	4157	28117	28140	0.038	44.6
Scaffold_10573	NC_007581	79.63	54	8	1	141	191	86164	86111	0.001	46.4
Scaffold_1058	NC_023719	70.536	224	66	0	16810	17033	203672	203449	1.16e-20	107
Scaffold_1058	KF296717	72.941	85	23	0	4578	4662	39620	39536	0.003	50
Scaffold_1058	KF296717	67.308	156	48	1	3111	3266	40742	40590	0.003	50
Scaffold_10583	NC_004303	81.538	65	12	0	1031	1095	39304	39240	1.2e-08	64.4
Scaffold_10583	NC_004586	73.913	92	24	0	906	997	31962	31871	5.11e-07	59
Scaffold_10583	NC_021336	78.333	60	13	0	437	496	23404	23345	0.000264	50
Scaffold_10583	NC_012753	77.419	62	14	0	1034	1095	29046	28985	0.000264	50
Scaffold_10583	KC413987	100	26	0	0	1360	1385	900	925	0.001	48.2
Scaffold_10583	KC348602	100	26	0	0	1360	1385	1186	1211	0.001	48.2
Scaffold_10583	KC348601	100	26	0	0	1360	1385	1398	1423	0.001	48.2
Scaffold_10583	NC_021337	92.857	28	2	0	545	572	3990	4017	0.039	42.8
Scaffold_10585	NC_016563	92.593	27	2	0	25	51	16916	16942	0.049	41
Scaffold_10585	NC_015721	90	30	3	0	149	178	22931	22960	0.049	41
Scaffold_10586	NC_004586	92.593	27	2	0	227	253	17170	17144	0.026	41
Scaffold_10588	NC_016563	79.032	62	7	4	855	912	88094	88035	0.045	41
Scaffold_1059	NC_001884	77.215	79	18	0	13283	13361	32773	32695	3.42e-07	62.6
Scaffold_1059	AY441783	89.474	38	4	0	13153	13190	12337	12374	0.000618	51.8
Scaffold_1059	KJ920400	81.034	58	7	2	15413	15470	2550	2603	0.002	50
Scaffold_1059	HE614282	81.034	58	7	2	15413	15470	40391	40338	0.002	50
Scaffold_10593	NC_020863	90.625	32	3	0	3306	3337	109455	109486	0.035	44.6
Scaffold_10594	NC_019526	93.333	30	2	0	296	325	123142	123171	0.000506	46.4
Scaffold_10595	NC_019443	90	30	3	0	75	104	36075	36104	0.034	41
Scaffold_10601	AP013385	90	30	3	0	432	461	20621	20592	0.02	41
Scaffold_10602	NC_021782	88.235	34	4	0	108	141	22696	22663	0.014	44.6
Scaffold_10602	NC_018855	85	40	5	1	3928	3967	90242	90280	0.049	42.8
Scaffold_10602	NC_005822	78.182	55	11	1	646	699	2395	2449	0.049	42.8
Scaffold_10602	KF562341	85	40	5	1	3928	3967	15932	15894	0.049	42.8
Scaffold_10603	AP013513	80.328	61	6	4	1164	1224	30005	29951	0.005	44.6
Scaffold_10603	NC_015263	84.615	39	3	1	655	693	103454	103489	0.018	42.8
Scaffold_10603	AP013475	88.571	35	3	1	1274	1308	22902	22869	0.018	42.8
Scaffold_10603	AP013402	90.323	31	3	0	899	929	34726	34696	0.018	42.8
Scaffold_10609	AP013411	85	40	5	1	438	476	22797	22836	0.007	42.8
Scaffold_10609	NC_011612	83.333	48	5	3	201	248	44487	44531	0.024	41
Scaffold_10609	NC_007063	83.333	48	5	3	201	248	26000	26044	0.024	41
Scaffold_10609	NC_007059	83.333	48	5	3	201	248	26323	26367	0.024	41
Scaffold_1061	NC_024144	82.353	51	4	3	1011	1059	26347	26300	0.038	42.8
Scaffold_10621	NC_023574	94.444	36	1	1	1641	1676	33006	33040	2.37e-05	53.6
Scaffold_10621	NC_015263	88.889	36	3	1	1641	1676	27624	27658	0.012	44.6
Scaffold_10621	NC_010363	76.667	60	12	1	3121	3178	17866	17925	0.043	42.8
Scaffold_10624	NC_021800	96	25	1	0	720	744	8174	8198	0.045	41
Scaffold_10628	NC_009813	96.154	26	1	0	1516	1541	42675	42650	0.026	42.8
Scaffold_10628	KC595511	100	23	0	0	1900	1922	78135	78113	0.026	42.8
Scaffold_10629	NC_023568	90.323	31	1	1	447	477	27586	27558	0.029	41
Scaffold_1063	NC_023599	90.625	32	2	1	1071	1101	20375	20406	0.05	41
Scaffold_10633	JX128259	81.25	48	9	0	1797	1844	14920	14873	0.003	46.4
Scaffold_10633	6.66667e+06	81.25	48	9	0	1797	1844	14256	14209	0.003	46.4
Scaffold_10633	NC_019503	79.592	49	10	0	1796	1844	15899	15851	0.012	44.6
Scaffold_10633	NC_016571	93.103	29	2	0	1650	1678	141639	141667	0.012	44.6
Scaffold_10633	NC_007581	96.154	26	1	0	2137	2162	6765	6790	0.041	42.8
Scaffold_10633	NC_005135	90.323	31	3	0	1819	1849	14882	14852	0.041	42.8
Scaffold_10633	HE956711	79.167	48	10	0	1797	1844	15446	15399	0.041	42.8
Scaffold_10633	AP011113	79.167	48	10	0	1797	1844	15471	15424	0.041	42.8
Scaffold_10633	6.66667e+06	88.571	35	3	1	1815	1848	8635	8669	0.041	42.8
Scaffold_10635	NC_023561	92.857	28	2	0	779	806	73882	73909	0.014	42.8
Scaffold_10637	KF296717	72.619	168	23	7	1549	1700	42265	42425	2.88e-15	86
Scaffold_10637	NC_021067	82	50	3	3	2288	2332	122747	122795	0.031	42.8
Scaffold_1064	NC_007021	84.444	45	6	1	327	370	8770	8726	0.002	46.4
Scaffold_1064	NC_024205	93.103	29	2	0	793	821	56066	56094	0.008	44.6
Scaffold_1064	NC_018856	93.103	29	2	0	793	821	30238	30266	0.008	44.6
Scaffold_1064	NC_012753	86.111	36	5	0	1331	1366	15078	15043	0.028	42.8
Scaffold_1064	AP013460	87.879	33	4	0	1509	1541	21651	21683	0.028	42.8
Scaffold_10642	NC_013085	87.879	33	4	0	1019	1051	142126	142158	0.041	42.8
Scaffold_10649	NC_019526	88.235	34	3	1	102	134	313275	313308	0.025	41
Scaffold_10649	FN667789	90	30	3	0	581	610	22142	22113	0.025	41
Scaffold_10654	NC_001884	75.862	116	28	0	3849	3964	130027	130142	3.13e-14	84.2
Scaffold_10654	NC_015262	81.633	49	4	2	5688	5736	23172	23215	0.027	44.6
Scaffold_10654	KC595511	87.179	39	4	1	7640	7678	47888	47851	0.027	44.6
Scaffold_10655	AP013511	74.324	74	14	2	522	595	17207	17139	0.008	44.6
Scaffold_10655	NC_021860	85	40	5	1	527	565	9176	9137	0.027	42.8
Scaffold_10657	NC_021853	78.723	47	10	0	463	509	30693	30739	0.032	41
Scaffold_10657	NC_021336	82.5	40	7	0	358	397	21653	21614	0.032	41
Scaffold_10657	KC182543	78.723	47	10	0	463	509	27603	27649	0.032	41
Scaffold_10660	NC_015290	68.421	247	64	9	143	382	151209	150970	5.41e-10	66.2
Scaffold_10661	NC_015290	68.826	247	63	9	28	267	151209	150970	1.42e-11	71.6
Scaffold_10661	GU071092	77.419	62	14	0	206	267	158873	158812	4.64e-05	50
Scaffold_10662	NC_015290	66.939	245	71	5	47	286	151209	150970	1.44e-09	64.4
Scaffold_10667	NC_019443	88.571	35	3	1	899	932	97065	97031	0.016	42.8
Scaffold_10667	KF021268	81.25	48	8	1	389	436	20792	20746	0.016	42.8
Scaffold_10669	NC_015279	93.333	30	2	0	1609	1638	182740	182769	0.008	46.4
Scaffold_10669	DQ004855	90.625	32	3	0	5905	5936	58947	58978	0.027	44.6
Scaffold_10670	NC_015464	83.784	37	6	0	273	309	124013	124049	0.033	41
Scaffold_10671	DQ394809	69.427	157	44	4	757	911	1964	1810	8.04e-06	53.6
Scaffold_10671	DQ394808	69.427	157	44	4	757	911	1964	1810	8.04e-06	53.6
Scaffold_10671	DQ394807	69.427	157	44	4	757	911	1964	1810	8.04e-06	53.6
Scaffold_10671	DQ394806	69.427	157	44	4	757	911	1964	1810	8.04e-06	53.6
Scaffold_10676	NC_021067	90	30	3	0	469	498	47382	47411	0.025	41
Scaffold_10683	NC_023719	87.5	40	0	3	461	499	105092	105057	0.033	41
Scaffold_10684	AP013453	79.592	49	8	1	125	171	7304	7256	0.027	41
Scaffold_10685	AP013514	83.784	37	6	0	659	695	9577	9541	0.03	41
Scaffold_10686	KC348603	80.583	103	20	0	615	717	7243	7345	4.85e-19	96.9
Scaffold_10686	NC_020883	92.593	27	2	0	35	61	45447	45421	0.033	41
Scaffold_10687	KF771236	87.179	39	4	1	2961	2998	35641	35603	0.022	44.6
Scaffold_10687	KC579452	87.179	39	4	1	2961	2998	38911	38873	0.022	44.6
Scaffold_10689	NC_006557	69.612	928	282	0	9	936	9809	8882	5.91e-111	403
Scaffold_10689	KC413988	68.217	129	41	0	1376	1504	28593	28721	0.000521	48.2
Scaffold_10689	KC295538	96.154	26	1	0	1111	1136	281363	281388	0.022	42.8
Scaffold_10689	AP013386	82.222	45	6	1	1101	1145	2355	2397	0.022	42.8
Scaffold_1069	6.66667e+06	83.333	42	5	1	379	418	127722	127763	0.021	42.8
Scaffold_10695	NC_023719	82.222	45	5	1	7161	7202	14869	14913	0.031	44.6
Scaffold_10695	NC_015250	78.947	57	7	2	7647	7699	62275	62330	0.031	44.6
Scaffold_10696	AP013406	86.047	43	2	2	2133	2174	16506	16467	0.003	46.4
Scaffold_10696	NC_021325	80.435	46	9	0	2104	2149	22089	22044	0.034	42.8
Scaffold_10696	JX274646	81.633	49	5	2	788	834	24767	24721	0.034	42.8
Scaffold_10696	AP013396	84.211	38	6	0	1557	1594	23532	23495	0.034	42.8
Scaffold_10697	NC_021803	80.769	52	9	1	455	506	35858	35908	0.001	46.4
Scaffold_10697	KC182544	93.103	29	2	0	153	181	16616	16644	0.004	44.6
Scaffold_10697	NC_021789	79.245	53	10	1	455	507	41163	41214	0.014	42.8
Scaffold_10697	NC_019448	82.609	46	6	2	21	64	120673	120628	0.049	41
Scaffold_10698	NC_021800	83.721	43	4	2	130	170	19901	19860	0.037	41
Scaffold_1070	KF296717	75.51	98	24	0	1	98	42370	42273	5.35e-11	69.8
Scaffold_10706	NC_020843	86.047	43	4	1	6123	6165	42327	42367	0.004	48.2
Scaffold_10706	NZ_ACSJ01000017	78.947	57	6	2	10461	10514	62784	62731	0.013	46.4
Scaffold_10706	NC_015568	88.571	35	4	0	5717	5751	33969	33935	0.013	46.4
Scaffold_10706	NC_007045	85	40	6	0	6229	6268	5135	5174	0.013	46.4
Scaffold_10706	NC_005282	93.103	29	2	0	8028	8056	81288	81260	0.045	44.6
Scaffold_10709	NC_008206	100	24	0	0	755	778	49652	49629	0.003	44.6
Scaffold_10709	NC_008199	82.927	41	7	0	334	374	397	357	0.011	42.8
Scaffold_10709	JX163858	84.211	38	6	0	615	652	5727	5764	0.011	42.8
Scaffold_10709	JX163858	87.5	32	4	0	603	634	5607	5638	0.038	41
Scaffold_10709	NC_019917	86.111	36	2	1	101	136	59749	59781	0.038	41
Scaffold_10709	NC_019411	87.5	32	4	0	603	634	206032	206001	0.038	41
Scaffold_10709	NC_019406	93.103	29	1	1	178	206	165890	165917	0.038	41
Scaffold_10709	6.66667e+06	87.5	32	4	0	343	374	388	357	0.038	41
Scaffold_1071	NC_023719	67.3	263	75	6	10492	10749	216546	216802	1.72e-09	69.8
Scaffold_1071	NC_009760	67.914	187	60	0	11588	11774	157592	157406	6e-09	68
Scaffold_1071	NC_009760	68.75	176	43	6	10540	10709	158601	158432	0.000132	53.6
Scaffold_1071	NC_008296	88.571	35	4	0	51	85	110523	110557	0.02	46.4
Scaffold_10710	KF156339	90.625	32	2	1	187	217	128157	128188	0.025	41
Scaffold_10711	NC_017978	71.875	96	19	4	45	134	21993	22086	0.021	41
Scaffold_10717	NC_009814	87.879	33	4	0	2629	2661	22318	22286	0.033	42.8
Scaffold_10725	NC_023719	87.879	33	4	0	2714	2746	370913	370945	0.035	42.8
Scaffold_10725	NC_020851	92.857	28	2	0	2708	2735	6707	6680	0.035	42.8
Scaffold_10725	KF021268	92.857	28	2	0	1273	1300	6356	6329	0.035	42.8
Scaffold_10726	NC_021536	80.357	56	11	0	4869	4924	89895	89950	0.000341	51.8
Scaffold_10726	NC_019516	76.623	77	16	2	4869	4944	32036	32111	0.000341	51.8
Scaffold_10726	NC_015281	78.947	57	12	0	4868	4924	39215	39271	0.001	50
Scaffold_10726	AP013388	93.939	33	1	1	1862	1893	4153	4121	0.004	48.2
Scaffold_1073	NC_024144	84	50	8	0	16590	16639	19173	19124	3.85e-05	55.4
Scaffold_1073	6.66667e+06	78.571	70	9	2	16913	16976	15950	15881	3.85e-05	55.4
Scaffold_1073	NC_024205	85.714	42	5	1	18884	18924	44321	44362	0.02	46.4
Scaffold_1073	NC_018856	85.714	42	5	1	18884	18924	18486	18527	0.02	46.4
Scaffold_1073	NC_007917	80	50	10	0	16590	16639	19211	19162	0.02	46.4
Scaffold_10732	NC_010576	92.857	28	2	0	455	482	17376	17349	0.019	42.8
Scaffold_10732	KF021268	81.395	43	8	0	882	924	49317	49275	0.019	42.8
Scaffold_10732	AP013513	82.222	45	7	1	774	817	26285	26241	0.019	42.8
Scaffold_10732	AP013512	82.222	45	7	1	774	817	27010	27054	0.019	42.8
Scaffold_10734	NC_023612	76.636	107	25	0	1121	1227	34056	34162	7.49e-14	80.6
Scaffold_10734	NC_021803	73.282	131	31	3	1111	1238	15700	15829	1.36e-10	69.8
Scaffold_10734	NC_015290	71	100	29	0	1124	1223	38083	38182	0.000127	50
Scaffold_10741	NC_013936	83.333	42	7	0	979	1020	7821	7780	0.008	44.6
Scaffold_10741	NC_011288	83.333	42	7	0	979	1020	7822	7781	0.008	44.6
Scaffold_10741	NC_011054	83.333	42	7	0	979	1020	7651	7610	0.008	44.6
Scaffold_10741	6.66667e+06	83.333	42	7	0	979	1020	7820	7779	0.008	44.6
Scaffold_10741	6.66667e+06	83.333	42	7	0	979	1020	7821	7780	0.008	44.6
Scaffold_10741	6.66667e+06	83.333	42	7	0	979	1020	7821	7780	0.008	44.6
Scaffold_10741	JN020142	82.927	41	7	0	979	1019	7820	7780	0.03	42.8
Scaffold_10743	NC_022918	69.159	642	184	9	307	941	72596	73230	3.29e-61	237
Scaffold_10743	NC_022918	80.392	51	9	1	1023	1073	73297	73346	0.004	44.6
Scaffold_10743	NC_020877	73.067	401	100	5	398	794	125975	125579	2.53e-56	221
Scaffold_10743	NC_020877	67.251	171	56	0	19	189	126490	126320	6.37e-07	57.2
Scaffold_10743	NC_007021	69.203	552	154	9	398	941	82411	82954	6.79e-51	203
Scaffold_10743	NC_007021	75.789	95	23	0	75	169	81952	82046	3.52e-10	68
Scaffold_10743	KF021268	67.919	692	191	16	398	1082	65045	65712	6.79e-51	203
Scaffold_10743	KF021268	81.967	61	10	1	673	732	58595	58655	6.37e-07	57.2
Scaffold_10743	KF021268	71.154	104	30	0	77	180	64588	64691	7.76e-06	53.6
Scaffold_10743	NC_011167	68.297	511	144	9	398	899	42564	42063	4.89e-40	167
Scaffold_10743	GU229986	68.297	511	144	9	398	899	29934	29433	4.89e-40	167
Scaffold_10743	NC_007581	65.223	716	215	16	386	1083	136986	136287	4.29e-28	127
Scaffold_10743	NC_007581	65.223	716	215	16	386	1083	162254	161555	4.29e-28	127
Scaffold_10743	NC_007581	66.298	362	119	1	614	972	101869	101508	1.71e-20	102
Scaffold_10743	NC_007581	69.953	213	56	4	291	498	127022	126813	1.31e-15	86
Scaffold_10743	NC_007581	69.347	199	41	5	703	891	126578	126390	5.58e-14	80.6
Scaffold_10743	NZ_ACSJ01000017	64.387	702	211	16	386	1066	60503	61186	1.71e-20	102
Scaffold_10743	NZ_ACSJ01000013	66.298	362	119	1	614	972	5718	6079	1.71e-20	102
Scaffold_10743	AP013453	80.435	46	2	1	508	546	817	862	0.004	44.6
Scaffold_10743	NC_015288	84.615	39	5	1	416	454	135405	135442	0.049	41
Scaffold_10743	NC_007623	87.5	32	4	0	697	728	41879	41910	0.049	41
Scaffold_10749	AP013482	90.323	31	3	0	185	215	26720	26750	0.029	42.8
Scaffold_1075	NC_006938	86.486	37	5	0	510	546	21430	21394	0.004	44.6
Scaffold_1075	NC_023591	78.846	52	10	1	846	897	89970	90020	0.043	41
Scaffold_10750	NC_022758	82.979	47	8	0	21583	21629	43391	43437	0.002	50
Scaffold_10750	NC_011612	82.979	47	8	0	21583	21629	18885	18931	0.002	50
Scaffold_10750	NC_007054	82.979	47	8	0	21583	21629	43720	43766	0.002	50
Scaffold_10750	NC_007053	82.979	47	8	0	21583	21629	42097	42143	0.002	50
Scaffold_10750	NC_007052	82.979	47	8	0	21583	21629	44803	44849	0.002	50
Scaffold_10750	NC_002661	82.979	47	8	0	21583	21629	15674	15720	0.002	50
Scaffold_10750	NC_020490	84	50	6	2	4907	4954	41764	41715	0.007	48.2
Scaffold_10750	NC_011398	89.189	37	2	1	19345	19381	24632	24666	0.025	46.4
Scaffold_10750	KF148616	86.842	38	5	0	8262	8299	81593	81630	0.025	46.4
Scaffold_10750	AP011616	80	55	10	1	4712	4766	113987	114040	0.025	46.4
Scaffold_10752	NC_021856	72	200	56	0	1744	1943	48227	48028	2.85e-22	109
Scaffold_10752	NC_022771	71.5	200	57	0	1744	1943	45753	45554	1.21e-20	104
Scaffold_10752	NC_024205	72.222	108	28	2	1801	1907	46842	46736	1.92e-05	53.6
Scaffold_10752	NC_018856	72.222	108	28	2	1801	1907	21007	20901	1.92e-05	53.6
Scaffold_10752	NC_016563	67.5	160	50	2	1747	1905	21901	21743	0.000818	48.2
Scaffold_10752	NC_021863	100	23	0	0	340	362	12293	12315	0.035	42.8
Scaffold_10756	NC_021856	74.566	173	36	2	7508	7672	12561	12733	6.4e-23	113
Scaffold_10756	NC_021856	80.328	61	10	2	63	121	14024	14084	0.000641	50
Scaffold_10756	AB091475	80.328	61	10	2	63	121	2520	2460	0.000641	50
Scaffold_10756	NC_021784	77.647	85	12	6	44	124	264	345	0.002	48.2
Scaffold_10762	KF296717	76.25	160	33	4	262	417	42426	42268	1.87e-21	104
Scaffold_10766	NC_019507	75.714	70	8	3	32	94	131213	131280	0.004	44.6
Scaffold_10766	NC_019443	84.444	45	4	2	562	605	54971	54929	0.004	44.6
Scaffold_10766	FN667788	75.714	70	8	3	32	94	35872	35939	0.004	44.6
Scaffold_10769	FN667789	78.182	55	11	1	10	63	97691	97745	0.008	42.8
Scaffold_10769	FN667788	78.182	55	11	1	10	63	96636	96690	0.008	42.8
Scaffold_10769	NC_014660	82.927	41	4	1	260	300	163350	163313	0.028	41
Scaffold_10769	HM246720	78.846	52	10	1	10	60	52587	52638	0.028	41
Scaffold_10775	KF296717	100	25	0	0	1	25	42298	42274	0.000742	46.4
Scaffold_10775	AY583235	82.609	46	5	2	301	343	8125	8170	0.032	41
Scaffold_10775	AY583234	82.609	46	5	2	301	343	3656	3701	0.032	41
Scaffold_10787	KF302035	91.176	34	2	1	8961	8993	25972	25939	0.04	44.6
Scaffold_10791	NC_004746	100	25	0	0	560	584	34441	34417	0.000689	46.4
Scaffold_10791	NC_014792	88.235	34	3	1	24	57	116629	116661	0.029	41
Scaffold_10792	NC_014792	88.235	34	3	1	24	57	116629	116661	0.029	41
Scaffold_10792	NC_004746	96	25	1	0	560	584	34441	34417	0.029	41
Scaffold_10795	HE858210	88.235	34	4	0	2604	2637	51360	51327	0.011	44.6
Scaffold_108	HQ906664	87.5	40	4	1	999	1037	18593	18554	0.001	46.4
Scaffold_108	NC_019914	80.952	42	8	0	980	1021	16111	16070	0.045	41
Scaffold_10801	FN667788	88.235	34	4	0	9635	9668	129249	129216	0.044	44.6
Scaffold_10803	NC_019401	67.857	476	142	5	1278	1746	150373	150844	4.17e-36	156
Scaffold_10803	NC_019526	67.596	287	84	4	1432	1712	48489	48772	5.08e-16	89.7
Scaffold_10803	NC_019526	66.783	286	82	8	2395	2672	49269	49549	2.02e-08	64.4
Scaffold_10803	KC295538	67.045	176	49	2	2302	2477	331588	331422	1.05e-05	55.4
Scaffold_10803	KJ596420	86.486	37	5	0	1303	1339	33647	33683	0.019	44.6
Scaffold_10803	AP011616	96.552	29	0	1	1076	1103	11036	11064	0.019	44.6
Scaffold_10804	NC_023007	82.222	45	7	1	352	396	22709	22752	0.018	42.8
Scaffold_10805	NC_023582	85.714	35	5	0	40	74	54632	54598	0.019	41
Scaffold_10810	NC_023719	65.058	601	182	6	3926	4505	254556	253963	3.88e-30	136
Scaffold_10810	NC_023719	93.75	32	2	0	3057	3088	15121	15090	0.000443	50
Scaffold_10810	AP013521	81.356	59	7	3	4902	4957	2835	2892	0.002	48.2
Scaffold_10810	AP013501	77.419	62	8	2	5098	5153	8962	9023	0.005	46.4
Scaffold_10810	NC_004166	90.625	32	3	0	2255	2286	16143	16112	0.019	44.6
Scaffold_10813	AP013408	92.857	28	2	0	138	165	9122	9095	0.023	42.8
Scaffold_10818	NC_001884	80	90	18	0	5991	6080	130088	129999	1.47e-13	82.4
Scaffold_10819	HM246720	80.851	47	3	2	74	118	21129	21171	0.017	41
Scaffold_1082	AB609718	64.801	2108	688	31	47665	49742	131790	133873	1.12e-97	365
Scaffold_1082	AB609718	68.176	729	214	8	85544	86263	129766	130485	6.21e-63	250
Scaffold_1082	AB609718	65.837	723	209	16	43902	44605	130764	131467	1.28e-33	152
Scaffold_1082	NC_023574	65.771	1674	522	28	47919	49562	69571	67919	5.81e-95	356
Scaffold_1082	NC_023574	66.564	326	76	11	44480	44788	75491	75182	8.1e-11	77
Scaffold_1082	NC_023574	72.951	122	33	0	43893	44014	76079	75958	3.44e-09	71.6
Scaffold_1082	NC_023574	68.153	157	44	2	47097	47250	61718	61565	0.000265	55.4
Scaffold_1082	NC_015263	68.148	405	119	8	49163	49562	64296	63897	2.17e-24	122
Scaffold_1082	NC_015263	72.376	181	50	0	118949	119129	15554	15734	2.03e-18	102
Scaffold_1082	NC_015263	69.079	152	41	2	47097	47245	57807	57659	2.17e-05	59
Scaffold_1082	NC_015253	68.195	349	109	2	48667	49014	83331	82984	2.17e-24	122
Scaffold_1082	NC_015253	77.679	112	25	0	39033	39144	25052	25163	1.28e-14	89.7
Scaffold_1082	NC_015253	74.359	117	30	0	86889	87005	95406	95290	8.1e-11	77
Scaffold_1082	NC_015253	70.94	117	34	0	43898	44014	87725	87609	2.17e-05	59
Scaffold_1082	NC_015253	71.287	101	29	0	49045	49145	82626	82526	0.003	51.8
Scaffold_1082	NC_019521	69.604	227	69	0	48871	49097	173476	173250	2.48e-17	98.7
Scaffold_1082	NC_019521	69.811	106	32	0	44446	44551	179014	178909	0.039	48.2
Scaffold_1082	NC_024356	68.345	278	82	3	38780	39054	21331	21605	8.65e-17	96.9
Scaffold_1082	NC_023719	66.929	381	110	9	48945	49317	54524	54152	1.05e-15	93.3
Scaffold_1082	KC595511	67.832	286	79	7	48824	49103	58872	59150	1.9e-12	82.4
Scaffold_1082	NC_019515	66.154	325	102	6	48997	49317	22842	23162	3.44e-09	71.6
Scaffold_1082	NC_019515	73.077	104	24	2	48117	48218	21929	22030	7.59e-05	57.2
Scaffold_1082	KM051843	77.273	88	20	0	49243	49330	69922	70009	1.2e-08	69.8
Scaffold_1082	KM051843	70.677	133	35	3	44265	44395	66991	67121	0.000265	55.4
Scaffold_1082	KM051843	78.261	69	13	2	47674	47741	68016	68083	0.011	50
Scaffold_1082	NC_019726	85.965	57	8	0	91895	91951	86155	86211	4.2e-08	68
Scaffold_1082	NC_019726	75.309	81	18	2	86889	86968	93865	93944	0.011	50
Scaffold_1082	KJ094032	70.423	142	42	0	118923	119064	53417	53276	4.2e-08	68
Scaffold_1082	EU418428	85.965	57	8	0	91895	91951	4197	4141	4.2e-08	68
Scaffold_1082	EU418428	85.965	57	8	0	91895	91951	141284	141228	4.2e-08	68
Scaffold_1082	EU418428	74.699	83	19	2	86889	86970	133567	133486	0.039	48.2
Scaffold_1082	NC_009812	85.246	61	5	2	96113	96171	23533	23475	5.11e-07	64.4
Scaffold_1082	NC_024387	80.263	76	9	3	96113	96183	23033	22959	1.78e-06	62.6
Scaffold_1082	NC_022918	85.185	54	8	0	91898	91951	4810	4757	1.78e-06	62.6
Scaffold_1082	NC_019448	85.185	54	8	0	91898	91951	1107	1054	1.78e-06	62.6
Scaffold_1082	NC_009815	86.792	53	5	1	96113	96163	22069	22017	1.78e-06	62.6
Scaffold_1082	NC_001884	75.862	87	21	0	49245	49331	121345	121259	1.78e-06	62.6
Scaffold_1082	NC_015262	83.929	56	9	0	42190	42245	36553	36608	6.23e-06	60.8
Scaffold_1082	NC_007581	78.049	82	16	2	127996	128077	171011	171090	6.23e-06	60.8
Scaffold_1082	NC_024384	85.185	54	6	1	96113	96164	30574	30521	2.17e-05	59
Scaffold_1082	NC_024125	83.051	59	9	1	133253	133310	56992	56934	2.17e-05	59
Scaffold_1082	NC_023717	85.714	56	6	2	133256	133310	148141	148195	2.17e-05	59
Scaffold_1082	NC_020081	63.474	449	158	4	49243	49688	61878	62323	2.17e-05	59
Scaffold_1082	NC_020081	78.261	69	13	2	47674	47741	59531	59598	0.011	50
Scaffold_1082	NC_021539	83.333	60	7	2	96113	96171	19076	19019	7.59e-05	57.2
Scaffold_1082	NC_015254	77.027	74	17	0	38624	38697	21004	21077	7.59e-05	57.2
Scaffold_1082	NC_015251	76.316	76	18	0	133252	133327	112481	112556	7.59e-05	57.2
Scaffold_1082	NC_003291	84.906	53	6	1	96113	96163	18799	18747	7.59e-05	57.2
Scaffold_1082	NC_023007	69.565	161	31	7	44353	44498	69898	69741	0.000265	55.4
Scaffold_1082	NC_023007	67.513	197	52	6	48825	49015	68134	67944	0.003	51.8
Scaffold_1082	NC_023007	78.125	64	10	2	49573	49634	67386	67325	0.039	48.2
Scaffold_1082	NC_019929	76.712	73	17	0	133253	133325	169223	169295	0.000265	55.4
Scaffold_1082	NC_018087	84.211	57	7	2	133255	133310	73956	73901	0.000265	55.4
Scaffold_1082	NC_014636	77.143	70	16	0	133256	133325	194852	194783	0.000265	55.4
Scaffold_1082	NC_012663	86.538	52	5	2	133256	133306	59795	59745	0.000265	55.4
Scaffold_1082	NC_011645	72	100	25	1	39738	39834	20191	20290	0.001	53.6
Scaffold_1082	NC_009810	84.906	53	6	2	96113	96163	23598	23546	0.001	53.6
Scaffold_1082	NC_022771	71.681	113	26	3	44445	44554	90711	90602	0.003	51.8
Scaffold_1082	NC_008720	81.034	58	10	1	133254	133310	33059	33116	0.003	51.8
Scaffold_1082	FR775895	70.37	108	32	0	87242	87349	50145	50038	0.003	51.8
Scaffold_1082	NC_019924	78.788	66	12	2	45489	45553	33294	33230	0.011	50
Scaffold_1082	NC_019913	100	27	0	0	133252	133278	22849	22875	0.011	50
Scaffold_1082	NC_019450	100	27	0	0	133252	133278	24649	24675	0.011	50
Scaffold_1082	NC_019450	68.047	169	50	4	86802	86968	8017	8183	0.039	48.2
Scaffold_1082	NC_015294	100	27	0	0	133252	133278	92507	92533	0.011	50
Scaffold_1082	NC_008265	72.449	98	23	2	16369	16464	37528	37433	0.011	50
Scaffold_1082	NC_005282	74.026	77	20	0	87795	87871	84120	84044	0.011	50
Scaffold_1082	NC_005260	75.714	70	17	0	133256	133325	107924	107855	0.011	50
Scaffold_1082	KJ473422	76.923	65	15	0	15884	15948	91857	91921	0.011	50
Scaffold_1082	KC595512	80.769	52	10	0	15896	15947	70165	70216	0.011	50
Scaffold_1082	NC_024122	93.548	31	2	0	128309	128339	5770	5740	0.039	48.2
Scaffold_1082	NC_023856	93.548	31	2	0	128309	128339	26822	26792	0.039	48.2
Scaffold_1082	NC_022096	80	60	10	2	133252	133310	120231	120289	0.039	48.2
Scaffold_1082	NC_021856	70.796	113	27	3	44445	44554	94709	94600	0.039	48.2
Scaffold_1082	NC_021802	85.106	47	4	2	4	48	31716	31761	0.039	48.2
Scaffold_1082	NC_020877	84.091	44	7	0	56087	56130	111256	111299	0.039	48.2
Scaffold_1082	NC_019915	76.712	73	15	2	56869	56940	11866	11795	0.039	48.2
Scaffold_1082	NC_019530	93.548	31	2	0	128309	128339	56691	56721	0.039	48.2
Scaffold_1082	NC_019529	93.548	31	2	0	158	188	38857	38887	0.039	48.2
Scaffold_1082	NC_019511	84.091	44	7	0	56087	56130	7996	7953	0.039	48.2
Scaffold_1082	NC_019452	93.548	31	2	0	128309	128339	56960	56990	0.039	48.2
Scaffold_1082	NC_016073	93.548	31	2	0	128309	128339	57938	57968	0.039	48.2
Scaffold_1082	NC_007917	93.548	31	2	0	113789	113819	51869	51839	0.039	48.2
Scaffold_1082	DQ004855	70.192	104	31	0	86889	86992	62570	62467	0.039	48.2
Scaffold_1082	AY176327	74.699	83	19	2	86889	86970	119356	119275	0.039	48.2
Scaffold_1082	AP013555	85.366	41	6	0	118287	118327	10398	10358	0.039	48.2
Scaffold_1082	AP013478	87.179	39	5	0	52697	52735	24401	24439	0.039	48.2
Scaffold_10821	NC_019526	81.481	54	6	3	1189	1241	40835	40885	0.021	42.8
Scaffold_10826	NC_023690	93.333	30	2	0	1001	1030	72564	72593	0.001	46.4
Scaffold_10826	NC_004688	93.333	30	2	0	1001	1030	77033	77062	0.001	46.4
Scaffold_10826	6.66667e+06	93.333	30	2	0	1001	1030	75548	75577	0.001	46.4
Scaffold_10826	6.66667e+06	93.333	30	2	0	1001	1030	73932	73961	0.001	46.4
Scaffold_10832	NC_010945	88.235	34	3	1	378	410	4573	4606	0.047	41
Scaffold_10835	HQ634152	96	25	1	0	144	168	23515	23539	0.022	41
Scaffold_10836	KF554508	82.222	45	8	0	478	522	96559	96603	0.000875	46.4
Scaffold_10836	KC595512	82.222	45	8	0	478	522	128676	128720	0.000875	46.4
Scaffold_10838	HM072038	90.62	2612	237	4	8480	11090	28808	31412	0	3595
Scaffold_10838	HM072038	72.619	84	23	0	6291	6374	27171	27254	0.003	48.2
Scaffold_10838	NC_003291	75.524	429	96	7	6842	7267	21809	22231	3.68e-72	277
Scaffold_10838	NC_021539	75	432	95	8	6841	7267	22085	22508	1.91e-69	268
Scaffold_10838	NC_024387	72.791	430	106	8	6842	7267	26225	26647	7.11e-56	223
Scaffold_10838	NC_009812	72.791	430	106	8	6842	7267	26727	27149	7.11e-56	223
Scaffold_10838	NC_006557	68.814	295	89	1	6586	6880	2868	3159	7.61e-24	116
Scaffold_10838	NC_009737	68.493	219	67	2	6581	6798	31261	31478	6.67e-12	77
Scaffold_10838	NC_008376	73.636	110	29	0	6581	6690	31812	31921	3.46e-09	68
Scaffold_10838	KC348599	75.238	105	24	2	5038	5141	41447	41344	1.21e-08	66.2
Scaffold_10838	KC348604	66.477	176	59	0	6824	6999	3293	3468	0.000266	51.8
Scaffold_10838	KC348600	66.477	176	59	0	6824	6999	35283	35108	0.000266	51.8
Scaffold_10838	NC_024356	91.429	35	2	1	10586	10620	27684	27651	0.011	46.4
Scaffold_10838	NC_023551	96.296	27	1	0	10593	10619	17257	17283	0.039	44.6
Scaffold_10838	KC595512	90.625	32	3	0	8669	8700	11984	12015	0.039	44.6
Scaffold_10838	JX409894	69.048	126	37	2	5038	5162	5530	5406	0.039	44.6
Scaffold_10839	NC_016562	87.5	32	4	0	71	102	48443	48474	0.022	41
Scaffold_10839	NC_015464	87.5	32	4	0	71	102	95500	95531	0.022	41
Scaffold_10839	KF148616	87.5	32	4	0	71	102	48677	48708	0.022	41
Scaffold_10839	FR823450	87.5	32	4	0	71	102	80031	80000	0.022	41
Scaffold_1084	KF021268	88.235	34	4	0	2941	2974	49794	49827	0.015	44.6
Scaffold_10842	NC_023706	87.879	33	4	0	387	419	28582	28550	0.01	42.8
Scaffold_10844	NC_003216	80.357	56	9	2	406	460	23660	23714	0.007	44.6
Scaffold_10844	NC_016562	82.927	41	7	0	412	452	74661	74701	0.025	42.8
Scaffold_10844	NC_015464	82.927	41	7	0	412	452	120774	120814	0.025	42.8
Scaffold_10844	KF148616	82.927	41	7	0	412	452	74894	74934	0.025	42.8
Scaffold_10844	FR823450	82.927	41	7	0	412	452	53440	53400	0.025	42.8
Scaffold_10844	FN667789	82.927	41	7	0	412	452	64939	64899	0.025	42.8
Scaffold_10844	AP013543	88.571	35	3	1	401	435	7310	7343	0.025	42.8
Scaffold_10845	NC_019526	85.106	47	4	2	1603	1646	134934	134888	0.001	48.2
Scaffold_10845	NC_006356	93.103	29	2	0	705	733	4965	4993	0.012	44.6
Scaffold_10845	NC_006820	86.486	37	3	1	1841	1875	106180	106216	0.043	42.8
Scaffold_10845	AP013393	90.323	31	3	0	38	68	22332	22362	0.043	42.8
Scaffold_10846	NC_021072	92.857	28	2	0	528	555	149133	149106	0.01	42.8
Scaffold_10852	NC_023587	96.429	28	1	0	345	372	84882	84855	0.003	46.4
Scaffold_10854	NC_007581	79.245	53	7	2	365	415	8793	8743	0.042	41
Scaffold_10866	NC_023571	93.103	29	1	1	699	727	41013	40986	0.045	41
Scaffold_10866	NC_019448	90	30	3	0	910	939	10736	10707	0.045	41
Scaffold_10867	6.66667e+06	96.154	26	1	0	1776	1801	55369	55394	0.024	42.8
Scaffold_1087	NC_001884	78.431	51	11	0	1214	1264	113241	113191	0.023	42.8
Scaffold_10874	NC_005822	70.482	166	49	0	583	748	116	281	3.74e-13	78.8
Scaffold_10874	AJ245616	70.482	166	49	0	583	748	25933	26098	3.74e-13	78.8
Scaffold_10874	NC_004302	69.88	166	50	0	583	748	116	281	4.56e-12	75.2
Scaffold_10874	NC_002703	69.88	166	50	0	583	748	116	281	4.56e-12	75.2
Scaffold_10874	NC_009813	66.667	240	72	5	1222	1457	41074	40839	1.22e-06	57.2
Scaffold_10874	NC_019726	88.571	35	4	0	1154	1188	90489	90455	0.002	46.4
Scaffold_10874	NC_023571	68.31	142	37	4	598	735	259	396	0.027	42.8
Scaffold_10874	NC_023560	68.31	142	37	4	598	735	259	396	0.027	42.8
Scaffold_10878	AP013397	78.723	47	4	1	50	90	22829	22783	0.027	41
Scaffold_1088	NC_015290	70.035	287	86	0	1756	2042	151230	150944	1.48e-28	131
Scaffold_1088	GU071092	70.588	272	68	5	1762	2027	159066	158801	9.34e-25	118
Scaffold_1088	GU071092	71.667	120	32	2	3587	3705	147068	146950	2.68e-06	57.2
Scaffold_1088	GU071092	69.333	150	44	2	847	995	158442	158294	2.68e-06	57.2
Scaffold_1088	GU071092	100	24	0	0	2489	2512	49513	49490	0.017	44.6
Scaffold_1088	GU071092	77.778	54	12	0	700	753	158586	158533	0.017	44.6
Scaffold_1088	NC_020851	82.353	51	8	1	3661	3710	20037	20087	0.001	48.2
Scaffold_10881	HQ641352	92.593	27	2	0	610	636	64269	64295	0.037	41
Scaffold_10881	HQ641348	92.593	27	2	0	610	636	57845	57871	0.037	41
Scaffold_10883	KF751795	91.176	34	1	2	337	368	20146	20179	0.018	41
Scaffold_10883	KF751793	91.176	34	1	2	337	368	23087	23120	0.018	41
Scaffold_10888	JQ740789	83.333	42	7	0	2706	2747	27180	27139	0.011	44.6
Scaffold_10888	JQ740788	83.333	42	7	0	2706	2747	27283	27242	0.011	44.6
Scaffold_10888	JQ740787	83.333	42	7	0	2706	2747	27387	27346	0.011	44.6
Scaffold_10888	NC_012530	85	40	4	1	558	597	26076	26039	0.039	42.8
Scaffold_10888	NC_001706	87.879	33	4	0	53	85	5089	5057	0.039	42.8
Scaffold_10889	6.66667e+06	92.593	27	2	0	44	70	30449	30423	0.019	41
Scaffold_10895	KF751795	90.625	32	3	0	6564	6595	9437	9468	0.037	44.6
Scaffold_10899	6.66667e+06	92.593	27	2	0	334	360	30423	30449	0.021	41
Scaffold_109	NC_023719	80.435	46	9	0	147	192	236819	236774	0.012	42.8
Scaffold_109	NC_019521	90.323	31	3	0	131	161	107265	107235	0.012	42.8
Scaffold_1090	HM246720	81.356	59	6	4	135	191	19138	19193	0.003	44.6
Scaffold_1090	6.66667e+06	83.784	37	6	0	88	124	250	286	0.038	41
Scaffold_10902	GQ478087	85	40	6	0	2365	2404	1184	1145	0.01	46.4
Scaffold_10902	GQ478085	85	40	6	0	2365	2404	1184	1145	0.01	46.4
Scaffold_10902	GQ478082	85	40	6	0	2365	2404	1184	1145	0.01	46.4
Scaffold_10904	KF296717	90.909	143	10	2	674	814	42425	42284	3.48e-48	194
Scaffold_10904	AP013423	92.593	27	2	0	370	396	20678	20704	0.048	41
Scaffold_10904	AP013422	92.593	27	2	0	370	396	26016	26042	0.048	41
Scaffold_10906	NC_019503	87.5	32	4	0	468	499	132993	132962	0.033	41
Scaffold_10906	HE956711	87.5	32	4	0	468	499	134045	134014	0.033	41
Scaffold_10908	NC_016563	83.721	43	2	2	16	58	8074	8111	0.022	42.8
Scaffold_10908	NC_016563	86.111	36	1	1	22	57	8112	8081	0.022	42.8
Scaffold_10909	NC_002747	79.63	54	11	0	434	487	18308	18255	0.000464	48.2
Scaffold_1091	NC_013085	73.885	157	28	2	936	1091	32081	31937	2.54e-20	102
Scaffold_1091	NC_013085	82.759	58	10	0	1483	1540	176378	176321	7.79e-08	60.8
Scaffold_1091	NC_013085	79.452	73	14	1	1220	1292	177433	177362	7.79e-08	60.8
Scaffold_1091	NC_013085	78.788	66	13	1	835	899	176458	176393	1.16e-05	53.6
Scaffold_1091	NC_013085	76.623	77	12	3	1121	1194	29531	29458	0.000141	50
Scaffold_1091	NC_013085	78.947	57	11	1	845	900	32078	32022	0.002	46.4
Scaffold_1091	NC_013085	76.812	69	14	2	1026	1092	177434	177366	0.002	46.4
Scaffold_1091	NC_013085	72.727	77	21	0	1396	1472	31290	31214	0.006	44.6
Scaffold_1091	NC_013085	77.193	57	13	0	1325	1381	32078	32022	0.006	44.6
Scaffold_1091	NC_013085	76.786	56	13	0	937	992	176373	176318	0.021	42.8
Scaffold_1091	NC_014636	85.057	87	13	0	934	1020	191935	191849	3.1e-19	98.7
Scaffold_1091	NC_014636	77.381	84	17	1	1020	1103	190046	189965	6.39e-09	64.4
Scaffold_1091	NC_014636	78.182	55	12	0	845	899	191930	191876	0.002	46.4
Scaffold_1091	NC_014636	78.182	55	12	0	939	993	193080	193026	0.002	46.4
Scaffold_1091	NC_015287	67.509	277	59	6	837	1110	216496	216744	3.77e-18	95.1
Scaffold_1091	NC_015287	82.456	57	9	1	845	900	216582	216638	3.31e-06	55.4
Scaffold_1091	NC_015287	88.235	34	4	0	1220	1253	216660	216693	0.006	44.6
Scaffold_1091	NC_023587	72.353	170	34	3	936	1104	152506	152663	1.32e-17	93.3
Scaffold_1091	NC_023587	79.688	64	12	1	837	899	19398	19461	1.16e-05	53.6
Scaffold_1091	NC_023587	78.125	64	13	1	632	695	152669	152731	0.000141	50
Scaffold_1091	NC_023587	78.182	55	11	1	1490	1544	152672	152725	0.021	42.8
Scaffold_1091	NC_021536	79.464	112	17	3	1444	1555	9740	9845	4.6e-17	91.5
Scaffold_1091	NC_021536	80.769	78	15	0	1395	1472	148127	148204	1.23e-11	73.4
Scaffold_1091	NC_021536	76.923	65	13	1	1403	1467	9901	9963	0.000491	48.2
Scaffold_1091	NC_021536	78.571	56	12	0	845	900	147060	147115	0.000491	48.2
Scaffold_1091	NC_021536	74.648	71	17	1	625	695	4928	4997	0.006	44.6
Scaffold_1091	NC_021536	77.193	57	13	0	937	993	9778	9834	0.006	44.6
Scaffold_1091	NC_008296	85.897	78	10	1	1479	1555	20073	20150	5.6e-16	87.8
Scaffold_1091	NC_008296	78.689	61	13	0	1324	1384	162268	162328	4.03e-05	51.8
Scaffold_1091	NC_008296	76.812	69	14	1	1026	1092	19734	19802	0.000141	50
Scaffold_1091	NC_008296	78.947	57	11	1	844	899	20007	20063	0.002	46.4
Scaffold_1091	NC_008296	77.193	57	13	0	937	993	20083	20139	0.006	44.6
Scaffold_1091	NC_008296	74.603	63	16	0	1404	1466	162267	162329	0.021	42.8
Scaffold_1091	NC_003315	85.897	78	10	1	938	1014	427	350	5.6e-16	87.8
Scaffold_1091	NC_001697	85.897	78	10	1	938	1014	425	348	5.6e-16	87.8
Scaffold_1091	HQ317385	86.301	73	10	0	1483	1555	19173	19245	5.6e-16	87.8
Scaffold_1091	HQ317385	82.278	79	14	0	1395	1473	154803	154881	8.31e-14	80.6
Scaffold_1091	HQ317385	83.333	60	9	1	936	994	153729	153788	7.79e-08	60.8
Scaffold_1091	HQ317385	77.778	72	16	0	1122	1193	13713	13784	2.72e-07	59
Scaffold_1091	HQ317385	80.702	57	10	1	845	900	153732	153788	0.000141	50
Scaffold_1091	HQ317385	80.357	56	10	1	845	899	19103	19158	0.000491	48.2
Scaffold_1091	HQ317385	77.193	57	13	0	937	993	19178	19234	0.006	44.6
Scaffold_1091	HQ317290	85.897	78	10	1	1479	1555	18004	18081	5.6e-16	87.8
Scaffold_1091	HQ317290	79.688	64	12	1	632	695	13798	13860	1.16e-05	53.6
Scaffold_1091	HQ317290	80	55	10	1	1490	1544	13801	13854	0.002	46.4
Scaffold_1091	HQ317290	77.193	57	13	0	937	993	18014	18070	0.006	44.6
Scaffold_1091	6.66667e+06	85.526	76	11	0	1398	1473	90639	90714	5.6e-16	87.8
Scaffold_1091	6.66667e+06	82.895	76	8	5	1484	1556	93212	93285	7.79e-08	60.8
Scaffold_1091	6.66667e+06	79.452	73	11	3	1121	1189	95020	95092	3.31e-06	55.4
Scaffold_1091	6.66667e+06	78.571	56	12	0	845	900	93219	93274	0.000491	48.2
Scaffold_1091	6.66667e+06	82.353	51	8	1	1490	1540	95600	95649	0.000491	48.2
Scaffold_1091	NC_022096	83.75	80	13	0	834	913	120224	120303	1.95e-15	86
Scaffold_1091	NC_022096	92.982	57	3	1	938	993	122773	122829	2.38e-14	82.4
Scaffold_1091	NC_022096	80	55	11	0	635	689	120235	120289	0.000141	50
Scaffold_1091	NC_022096	75.714	70	17	0	938	1007	122612	122681	0.000141	50
Scaffold_1091	NC_022096	78.182	55	12	0	1490	1544	120235	120289	0.002	46.4
Scaffold_1091	NC_021782	91.803	61	4	1	938	997	61581	61641	6.82e-15	84.2
Scaffold_1091	NC_021782	70.395	152	43	2	1325	1475	61582	61732	6.39e-09	64.4
Scaffold_1091	NC_021782	69.481	154	27	8	845	994	61582	61719	0.000491	48.2
Scaffold_1091	NC_021782	77.465	71	13	3	630	697	61657	61727	0.002	46.4
Scaffold_1091	NC_021772	91.803	61	4	1	938	997	66712	66772	6.82e-15	84.2
Scaffold_1091	NC_021772	70.395	152	43	2	1325	1475	66713	66863	6.39e-09	64.4
Scaffold_1091	NC_021772	69.481	154	27	8	845	994	66713	66850	0.000491	48.2
Scaffold_1091	NC_021772	77.465	71	13	3	630	697	66788	66858	0.002	46.4
Scaffold_1091	NC_019507	82.353	85	14	1	1394	1477	167548	167464	2.38e-14	82.4
Scaffold_1091	NC_019507	75.362	69	15	1	937	1003	166746	166678	0.002	46.4
Scaffold_1091	NC_020851	75.221	113	20	1	1443	1555	53845	53741	8.31e-14	80.6
Scaffold_1091	NC_020851	77.193	57	13	0	937	993	53808	53752	0.006	44.6
Scaffold_1091	NC_015251	71.257	167	39	3	938	1103	112209	112367	8.31e-14	80.6
Scaffold_1091	NC_015251	83.929	56	9	0	938	993	113574	113629	7.79e-08	60.8
Scaffold_1091	NC_015251	78.205	78	16	1	627	703	113819	113896	7.79e-08	60.8
Scaffold_1091	NC_015251	83.333	54	9	0	939	992	112485	112538	9.48e-07	57.2
Scaffold_1091	NC_015251	80.357	56	10	1	939	993	112650	112705	0.000491	48.2
Scaffold_1091	NC_015251	75.342	73	15	2	1120	1190	115254	115325	0.006	44.6
Scaffold_1091	6.66667e+06	84.211	76	10	1	1398	1473	91125	91198	8.31e-14	80.6
Scaffold_1091	6.66667e+06	82.278	79	9	5	1481	1556	93916	93992	2.23e-08	62.6
Scaffold_1091	6.66667e+06	81.69	71	11	2	1121	1189	96766	96836	2.23e-08	62.6
Scaffold_1091	6.66667e+06	78.571	56	12	0	845	900	93926	93981	0.000491	48.2
Scaffold_1091	6.66667e+06	82.353	51	8	1	1490	1540	97344	97393	0.000491	48.2
Scaffold_1091	NC_015282	83.562	73	12	0	1483	1555	19486	19558	2.9e-13	78.8
Scaffold_1091	NC_015282	78.261	69	13	1	1026	1092	18960	19028	3.31e-06	55.4
Scaffold_1091	NC_015282	79.31	58	12	0	845	902	19493	19550	4.03e-05	51.8
Scaffold_1091	NC_015282	65.789	152	33	2	843	993	19414	19547	0.000491	48.2
Scaffold_1091	NC_015282	78.571	56	12	0	845	900	160623	160678	0.000491	48.2
Scaffold_1091	HQ630627	84.81	79	9	3	837	913	294938	294861	2.9e-13	78.8
Scaffold_1091	HQ630627	80.702	57	9	2	635	689	294930	294874	0.002	46.4
Scaffold_1091	NC_019529	84.722	72	10	1	939	1009	38064	38135	1.01e-12	77
Scaffold_1091	NC_019529	87.097	62	8	0	937	998	40436	40497	1.01e-12	77
Scaffold_1091	NC_019529	80.263	76	14	1	1019	1093	39226	39301	1.83e-09	66.2
Scaffold_1091	NC_019529	77.143	105	19	5	1399	1501	42189	42290	6.39e-09	64.4
Scaffold_1091	NC_019529	75.61	82	20	0	1314	1395	45232	45313	2.72e-07	59
Scaffold_1091	NC_019529	76.056	71	17	0	938	1008	40154	40224	4.03e-05	51.8
Scaffold_1091	NC_019529	74.074	81	21	0	624	704	40427	40507	4.03e-05	51.8
Scaffold_1091	NC_019529	76.25	80	14	4	1400	1477	40432	40508	0.002	46.4
Scaffold_1091	NC_019529	76.786	56	13	0	845	900	40438	40493	0.021	42.8
Scaffold_1091	NC_020837	82.432	74	13	0	1483	1556	74203	74130	3.53e-12	75.2
Scaffold_1091	NC_020837	83.582	67	10	1	1025	1091	74881	74816	5.25e-10	68
Scaffold_1091	NC_020837	77.143	70	14	2	633	701	74198	74130	0.000491	48.2
Scaffold_1091	NC_020837	76.19	63	15	0	836	898	74965	74903	0.002	46.4
Scaffold_1091	NC_020837	88.235	34	4	0	1220	1253	75859	75826	0.006	44.6
Scaffold_1091	NC_015279	81.579	76	14	0	1397	1472	142212	142287	3.53e-12	75.2
Scaffold_1091	NC_015279	89.286	56	5	1	1490	1544	129317	129372	4.31e-11	71.6
Scaffold_1091	NC_015279	81.944	72	12	1	936	1006	140958	141029	5.25e-10	68
Scaffold_1091	NC_015279	78.205	78	16	1	1016	1092	22306	22383	7.79e-08	60.8
Scaffold_1091	NC_015279	82.456	57	9	1	845	900	140961	141017	3.31e-06	55.4
Scaffold_1091	NC_015279	81.667	60	10	1	634	693	141337	141395	3.31e-06	55.4
Scaffold_1091	NC_015279	79.31	58	11	1	1488	1545	141336	141392	0.000491	48.2
Scaffold_1091	NC_022052	83.824	68	11	0	938	1005	64723	64790	1.23e-11	73.4
Scaffold_1091	NC_022052	87.5	56	7	0	938	993	66064	66009	1.5e-10	69.8
Scaffold_1091	NC_022052	87.273	55	7	0	845	899	66063	66009	5.25e-10	68
Scaffold_1091	NC_022052	83.636	55	9	0	845	899	64724	64778	2.72e-07	59
Scaffold_1091	NC_022052	81.034	58	11	0	1405	1462	63475	63532	3.31e-06	55.4
Scaffold_1091	NC_021072	78.351	97	15	3	1444	1540	35927	35837	1.23e-11	73.4
Scaffold_1091	NC_021072	78.873	71	13	1	1024	1092	37371	37301	2.72e-07	59
Scaffold_1091	NC_021072	78.571	56	12	0	937	992	35889	35834	0.000491	48.2
Scaffold_1091	NC_021072	76.786	56	13	0	845	900	71476	71421	0.021	42.8
Scaffold_1091	NC_015286	80.769	78	15	0	1479	1556	22472	22549	1.23e-11	73.4
Scaffold_1091	NC_015286	78.873	71	13	1	1024	1092	22319	22389	2.72e-07	59
Scaffold_1091	NC_015286	74.026	77	19	1	625	701	17786	17861	0.002	46.4
Scaffold_1091	NC_012663	81.25	80	14	1	831	910	59808	59730	1.23e-11	73.4
Scaffold_1091	NC_012663	87.719	57	7	0	938	994	59796	59740	4.31e-11	71.6
Scaffold_1091	NC_012663	82.09	67	12	0	1396	1462	59489	59423	5.25e-10	68
Scaffold_1091	NC_012663	80.303	66	12	1	939	1004	59607	59543	9.48e-07	57.2
Scaffold_1091	JQ347801	80.769	78	15	0	836	913	23480	23557	1.23e-11	73.4
Scaffold_1091	NC_023717	85.484	62	9	0	937	998	148139	148200	4.31e-11	71.6
Scaffold_1091	NC_023717	85.965	57	8	0	837	893	148133	148189	5.25e-10	68
Scaffold_1091	NC_023717	78.082	73	16	0	631	703	148137	148209	7.79e-08	60.8
Scaffold_1091	NC_023717	79.167	72	12	3	938	1007	149375	149445	4.03e-05	51.8
Scaffold_1091	NC_014663	71.724	145	32	3	845	989	80023	79888	4.31e-11	71.6
Scaffold_1091	NC_014663	78.409	88	13	3	934	1017	80030	79945	1.83e-09	66.2
Scaffold_1091	NC_014663	80	55	11	0	939	993	79671	79617	0.000141	50
Scaffold_1091	NC_014663	78.182	55	12	0	845	899	79671	79617	0.002	46.4
Scaffold_1091	NC_014663	78.431	51	11	0	939	989	79855	79805	0.021	42.8
Scaffold_1091	AF503408	76.531	98	20	1	1489	1583	71741	71838	4.31e-11	71.6
Scaffold_1091	AF503408	80.357	56	11	0	938	993	71741	71796	4.03e-05	51.8
Scaffold_1091	6.66667e+06	88.889	54	6	0	939	992	64889	64836	4.31e-11	71.6
Scaffold_1091	6.66667e+06	82.54	63	11	0	938	1000	62250	62312	6.39e-09	64.4
Scaffold_1091	6.66667e+06	82.143	56	10	0	845	900	62251	62306	9.48e-07	57.2
Scaffold_1091	6.66667e+06	83.333	54	9	0	845	898	64889	64836	9.48e-07	57.2
Scaffold_1091	NC_023006	78.313	83	18	0	1313	1395	21144	21062	1.5e-10	69.8
Scaffold_1091	NC_019516	79.518	83	16	1	1391	1473	15395	15476	1.5e-10	69.8
Scaffold_1091	NC_019516	78.75	80	11	2	616	695	28873	28946	6.39e-09	64.4
Scaffold_1091	NC_019516	83.051	59	9	1	936	993	17052	17110	2.72e-07	59
Scaffold_1091	NC_019516	82.143	56	9	1	845	899	17055	17110	1.16e-05	53.6
Scaffold_1091	NC_019516	71.91	89	25	0	1007	1095	26899	26987	0.000491	48.2
Scaffold_1091	NC_011041	82.09	67	12	0	834	900	62219	62153	5.25e-10	68
Scaffold_1091	NC_011041	80.357	56	11	0	1405	1460	62046	61991	4.03e-05	51.8
Scaffold_1091	AP013400	79.221	77	16	0	1405	1481	32302	32378	5.25e-10	68
Scaffold_1091	AF234173	85	60	9	0	1489	1548	69113	69172	5.25e-10	68
Scaffold_1091	AF234173	80.357	56	11	0	938	993	69113	69168	4.03e-05	51.8
Scaffold_1091	NC_021071	81.159	69	13	0	1024	1092	39436	39368	1.83e-09	66.2
Scaffold_1091	NC_020862	69.512	164	41	3	845	1007	70004	69849	1.83e-09	66.2
Scaffold_1091	NC_020862	75.342	73	16	2	939	1010	70261	70190	0.006	44.6
Scaffold_1091	NC_020862	82.927	41	7	0	1490	1530	70261	70221	0.021	42.8
Scaffold_1091	KF301602	85.714	56	8	0	939	994	143963	143908	1.83e-09	66.2
Scaffold_1091	KC661276	84.746	59	9	0	1405	1463	63645	63703	1.83e-09	66.2
Scaffold_1091	KC661276	82.456	57	10	0	938	994	64978	65034	2.72e-07	59
Scaffold_1091	KC661276	84.314	51	8	0	939	989	67007	66957	9.48e-07	57.2
Scaffold_1091	KC661276	78.125	64	14	0	1487	1550	63342	63405	1.16e-05	53.6
Scaffold_1091	KC661276	80.357	56	11	0	845	900	64979	65034	4.03e-05	51.8
Scaffold_1091	JN797798	78.481	79	17	0	833	911	150030	149952	1.83e-09	66.2
Scaffold_1091	JN797798	83.333	60	10	0	938	997	150019	149960	6.39e-09	64.4
Scaffold_1091	JN797798	76.786	56	13	0	939	994	148792	148737	0.021	42.8
Scaffold_1091	233894	85.714	56	8	0	635	690	64465	64410	1.83e-09	66.2
Scaffold_1091	233894	82.143	56	10	0	1490	1545	64465	64410	9.48e-07	57.2
Scaffold_1091	233894	80.392	51	10	0	939	989	64465	64415	0.000491	48.2
Scaffold_1091	NC_019913	81.081	74	12	2	939	1011	21970	22042	6.39e-09	64.4
Scaffold_1091	NC_019913	80.282	71	12	2	939	1007	22769	22839	2.72e-07	59
Scaffold_1091	NC_019913	78.873	71	14	1	830	900	21956	22025	9.48e-07	57.2
Scaffold_1091	NC_019913	69.481	154	33	5	845	996	22769	22910	9.48e-07	57.2
Scaffold_1091	NC_019913	69.565	138	38	3	1405	1540	22768	22903	0.000141	50
Scaffold_1091	NC_019913	78.947	57	10	2	939	994	22630	22685	0.021	42.8
Scaffold_1091	NC_019408	76.744	86	17	1	1390	1475	50074	50156	6.39e-09	64.4
Scaffold_1091	NC_019408	78.182	55	12	0	939	993	52127	52181	0.002	46.4
Scaffold_1091	NC_011273	71.528	144	29	5	854	996	93664	93796	6.39e-09	64.4
Scaffold_1091	NC_011273	82.222	45	7	1	1145	1189	95174	95217	0.021	42.8
Scaffold_1091	NC_008720	77.5	80	18	0	837	916	32624	32703	6.39e-09	64.4
Scaffold_1091	NC_008720	82.143	56	10	0	938	993	32631	32686	9.48e-07	57.2
Scaffold_1091	KC954775	84.483	58	9	0	842	899	122731	122788	6.39e-09	64.4
Scaffold_1091	KC954775	76.923	78	16	2	939	1015	122734	122810	1.16e-05	53.6
Scaffold_1091	JQ691610	79.221	77	15	1	936	1011	2886	2810	6.39e-09	64.4
Scaffold_1091	NC_019503	79.71	69	14	0	831	899	69461	69393	2.23e-08	62.6
Scaffold_1091	NC_019503	82.759	58	10	0	1405	1462	69619	69562	7.79e-08	60.8
Scaffold_1091	NC_019503	80	60	12	0	634	693	69448	69389	3.31e-06	55.4
Scaffold_1091	NC_019399	79.71	69	14	0	831	899	68649	68581	2.23e-08	62.6
Scaffold_1091	NC_019399	82.759	58	10	0	1405	1462	68807	68750	7.79e-08	60.8
Scaffold_1091	NC_019399	80	60	12	0	634	693	68636	68577	3.31e-06	55.4
Scaffold_1091	NC_015288	81.159	69	12	1	1023	1091	20483	20550	2.23e-08	62.6
Scaffold_1091	NC_015288	79.688	64	12	1	632	695	163578	163640	1.16e-05	53.6
Scaffold_1091	NC_015288	80	55	10	1	1490	1544	163581	163634	0.002	46.4
Scaffold_1091	NC_006820	81.818	66	11	1	1026	1091	165226	165290	2.23e-08	62.6
Scaffold_1091	NC_006820	91.429	35	3	0	1219	1253	163584	163618	0.000141	50
Scaffold_1091	NC_006820	78.689	61	9	2	1406	1464	119619	119677	0.002	46.4
Scaffold_1091	NC_006820	75.325	77	13	3	1121	1194	122999	123072	0.002	46.4
Scaffold_1091	NC_006820	76.119	67	15	1	1027	1092	163585	163651	0.002	46.4
Scaffold_1091	NC_006820	78.182	55	12	0	845	899	165152	165206	0.002	46.4
Scaffold_1091	NC_006820	84.211	38	6	0	1148	1185	118879	118916	0.021	42.8
Scaffold_1091	JX128259	79.71	69	14	0	831	899	68832	68764	2.23e-08	62.6
Scaffold_1091	JX128259	80	60	12	0	634	693	68819	68760	3.31e-06	55.4
Scaffold_1091	NC_023561	77.632	76	17	0	838	913	72179	72104	7.79e-08	60.8
Scaffold_1091	NC_023561	83.929	56	9	0	938	993	72173	72118	7.79e-08	60.8
Scaffold_1091	NC_023561	82.759	58	10	0	1405	1462	75753	75696	7.79e-08	60.8
Scaffold_1091	NC_023561	83.871	62	8	2	938	997	77328	77267	7.79e-08	60.8
Scaffold_1091	NC_023561	75.714	70	16	1	939	1007	74678	74609	0.002	46.4
Scaffold_1091	NC_023561	73.611	72	19	0	1489	1560	72173	72102	0.006	44.6
Scaffold_1091	NC_022968	78.873	71	15	0	937	1007	66102	66032	7.79e-08	60.8
Scaffold_1091	NC_019400	78.873	71	15	0	937	1007	85037	85107	7.79e-08	60.8
Scaffold_1091	NC_018087	83.929	56	9	0	939	994	73955	73900	7.79e-08	60.8
Scaffold_1091	NC_014662	83.871	62	8	2	938	997	69896	69835	7.79e-08	60.8
Scaffold_1091	NC_010583	76.543	81	14	1	1019	1099	32626	32551	7.79e-08	60.8
Scaffold_1091	NC_006565	93.023	43	2	1	845	886	54059	54017	7.79e-08	60.8
Scaffold_1091	NC_006565	84.615	39	6	0	1321	1359	54063	54025	0.006	44.6
Scaffold_1091	KF055347	77.108	83	18	1	1312	1394	72951	72870	7.79e-08	60.8
Scaffold_1091	KF017927	82.759	58	10	0	939	996	4137	4194	7.79e-08	60.8
Scaffold_1091	KF017927	65.027	183	44	3	842	1005	4134	4315	0.002	46.4
Scaffold_1091	HM137666	82.759	58	10	0	1405	1462	72252	72195	7.79e-08	60.8
Scaffold_1091	HM137666	76.667	60	14	0	634	693	72082	72023	0.002	46.4
Scaffold_1091	HE956711	82.759	58	10	0	1405	1462	69383	69326	7.79e-08	60.8
Scaffold_1091	HE956711	76.667	60	14	0	634	693	69211	69152	0.002	46.4
Scaffold_1091	6.66667e+06	82.759	58	10	0	1405	1462	68402	68345	7.79e-08	60.8
Scaffold_1091	NC_023719	77.333	75	17	0	1317	1391	403940	404014	2.72e-07	59
Scaffold_1091	NC_023584	78.873	71	13	1	1024	1092	18855	18925	2.72e-07	59
Scaffold_1091	NC_023584	81.818	55	10	0	939	993	19644	19698	3.31e-06	55.4
Scaffold_1091	NC_023584	80	60	11	1	936	994	154518	154577	4.03e-05	51.8
Scaffold_1091	NC_023584	78.182	55	11	1	1490	1544	13867	13920	0.021	42.8
Scaffold_1091	NC_021788	84.211	57	8	1	939	994	89645	89701	2.72e-07	59
Scaffold_1091	NC_021788	78.571	56	12	0	939	994	90636	90691	0.000491	48.2
Scaffold_1091	NC_021788	78.182	55	12	0	845	899	143240	143294	0.002	46.4
Scaffold_1091	NC_019543	82.456	57	10	0	937	993	63483	63427	2.72e-07	59
Scaffold_1091	NC_019538	68.293	164	35	4	938	1099	198619	198767	2.72e-07	59
Scaffold_1091	NC_019538	76.543	81	18	1	1395	1475	199778	199857	9.48e-07	57.2
Scaffold_1091	NC_019538	81.034	58	11	0	937	994	199787	199844	3.31e-06	55.4
Scaffold_1091	NC_019538	80	60	11	1	935	993	198938	198997	4.03e-05	51.8
Scaffold_1091	NC_019538	78.571	56	12	0	938	993	200140	200195	0.000491	48.2
Scaffold_1091	NC_019445	77.922	77	16	1	936	1011	14492	14416	2.72e-07	59
Scaffold_1091	NC_016571	76.744	86	17	2	1313	1396	16203	16119	2.72e-07	59
Scaffold_1091	NC_015569	82.258	62	10	1	1405	1465	134680	134741	2.72e-07	59
Scaffold_1091	NC_015569	77.333	75	15	1	1398	1472	129164	129236	9.48e-07	57.2
Scaffold_1091	NC_015569	74.667	75	19	0	1122	1196	130519	130593	0.000141	50
Scaffold_1091	NC_015569	76.562	64	14	1	1399	1461	135200	135263	0.006	44.6
Scaffold_1091	NC_015294	73.282	131	22	7	830	957	91617	91737	2.72e-07	59
Scaffold_1091	NC_015294	79.73	74	13	2	939	1011	91631	91703	2.72e-07	59
Scaffold_1091	NC_015294	80.282	71	12	2	939	1007	92427	92497	2.72e-07	59
Scaffold_1091	NC_015294	68.831	154	34	5	845	996	92427	92568	4.03e-05	51.8
Scaffold_1091	NC_015294	77.143	70	15	1	831	899	92496	92565	4.03e-05	51.8
Scaffold_1091	NC_015294	69.118	136	38	3	1405	1538	92426	92559	0.002	46.4
Scaffold_1091	NC_015289	78.873	71	13	1	1024	1092	19386	19456	2.72e-07	59
Scaffold_1091	NC_015289	81.818	55	10	0	635	689	161706	161760	3.31e-06	55.4
Scaffold_1091	NC_015289	80.357	56	10	1	845	899	19476	19531	0.000491	48.2
Scaffold_1091	NC_015289	74.242	66	17	0	1479	1544	161695	161760	0.021	42.8
Scaffold_1091	NC_015285	78.873	71	13	1	1024	1092	18351	18421	2.72e-07	59
Scaffold_1091	NC_015285	81.667	60	10	1	936	994	158986	159045	3.31e-06	55.4
Scaffold_1091	NC_015285	79.688	64	12	1	632	695	14338	14400	1.16e-05	53.6
Scaffold_1091	NC_015285	80	55	10	1	1490	1544	14341	14394	0.002	46.4
Scaffold_1091	NC_015285	78.947	57	11	1	845	900	158989	159045	0.002	46.4
Scaffold_1091	NC_007804	77.922	77	16	1	936	1011	2925	2849	2.72e-07	59
Scaffold_1091	NC_004629	83.636	55	9	0	939	993	271809	271755	2.72e-07	59
Scaffold_1091	NC_004629	71.053	114	26	3	1316	1425	271901	271791	0.000141	50
Scaffold_1091	NC_004629	81.132	53	9	1	833	884	266802	266750	0.000491	48.2
Scaffold_1091	NC_004629	81.25	48	9	0	1212	1259	273441	273394	0.002	46.4
Scaffold_1091	NC_004629	77.419	62	12	2	845	904	272941	272880	0.021	42.8
Scaffold_1091	NC_004629	78.431	51	11	0	1490	1540	273339	273289	0.021	42.8
Scaffold_1091	JX306041	82.456	57	10	0	937	993	67463	67407	2.72e-07	59
Scaffold_1091	JX306041	79.487	78	12	4	939	1015	67821	67747	3.31e-06	55.4
Scaffold_1091	JX306041	87.179	39	5	0	838	876	66813	66775	0.000491	48.2
Scaffold_1091	JX306041	78.947	57	11	1	937	992	68608	68552	0.002	46.4
Scaffold_1091	FR775895	81.667	60	11	0	938	997	52514	52573	2.72e-07	59
Scaffold_1091	NC_024125	81.356	59	11	0	1405	1463	56990	56932	9.48e-07	57.2
Scaffold_1091	NC_024121	84.314	51	8	0	939	989	66519	66469	9.48e-07	57.2
Scaffold_1091	NC_019521	81.967	61	10	1	935	994	1601	1661	9.48e-07	57.2
Scaffold_1091	NC_019521	80.702	57	10	1	845	900	1605	1661	0.000141	50
Scaffold_1091	NC_014661	83.333	54	9	0	936	989	80106	80053	9.48e-07	57.2
Scaffold_1091	NC_014661	77.778	54	12	0	939	992	79728	79675	0.006	44.6
Scaffold_1091	NC_013696	83.333	54	9	0	939	992	39653	39706	9.48e-07	57.2
Scaffold_1091	NC_001900	82.759	58	9	1	939	996	4225	4281	9.48e-07	57.2
Scaffold_1091	NC_023571	74.713	87	21	1	1020	1105	1	87	3.31e-06	55.4
Scaffold_1091	NC_023571	75	68	15	1	1220	1287	8	73	0.006	44.6
Scaffold_1091	NC_023560	74.713	87	21	1	1020	1105	1	87	3.31e-06	55.4
Scaffold_1091	NC_023560	75	68	15	1	1220	1287	8	73	0.006	44.6
Scaffold_1091	NC_023559	74.713	87	21	1	1020	1105	1	87	3.31e-06	55.4
Scaffold_1091	NC_023559	75	68	15	1	1220	1287	8	73	0.006	44.6
Scaffold_1091	NC_019450	81.034	58	11	0	939	996	24653	24710	3.31e-06	55.4
Scaffold_1091	NC_019450	73.276	116	19	6	845	957	23771	23877	1.16e-05	53.6
Scaffold_1091	NC_019450	77.465	71	14	2	939	1007	24569	24639	0.000141	50
Scaffold_1091	NC_019450	71.134	97	27	1	1444	1540	24608	24703	0.002	46.4
Scaffold_1091	NC_019450	78.947	57	10	2	939	994	24430	24485	0.021	42.8
Scaffold_1091	NC_016166	81.034	58	11	0	939	996	13428	13485	3.31e-06	55.4
Scaffold_1091	NC_016166	76.786	56	13	0	845	900	13428	13483	0.021	42.8
Scaffold_1091	NC_015250	81.818	55	10	0	939	993	67568	67514	3.31e-06	55.4
Scaffold_1091	NC_015250	75.325	77	19	0	931	1007	69816	69740	1.16e-05	53.6
Scaffold_1091	NC_015250	80.328	61	11	1	845	904	69808	69748	1.16e-05	53.6
Scaffold_1091	NC_015250	80.357	56	11	0	938	993	66748	66693	4.03e-05	51.8
Scaffold_1091	NC_011811	81.818	55	10	0	845	899	22242	22296	3.31e-06	55.4
Scaffold_1091	NC_010324	75.641	78	19	0	1317	1394	66428	66351	3.31e-06	55.4
Scaffold_1091	KJ567043	84.615	52	7	1	939	989	78505	78556	3.31e-06	55.4
Scaffold_1091	KJ567043	78.571	56	12	0	939	994	78715	78770	0.000491	48.2
Scaffold_1091	KJ567043	76.786	56	13	0	845	900	78715	78770	0.021	42.8
Scaffold_1091	KJ538722	94.286	35	2	0	1439	1473	25145	25179	3.31e-06	55.4
Scaffold_1091	KF156339	81.818	55	10	0	939	993	19144	19198	3.31e-06	55.4
Scaffold_1091	KF156339	76.812	69	14	1	1024	1090	17224	17292	0.000141	50
Scaffold_1091	HQ728263	81.818	55	10	0	845	899	5217	5271	3.31e-06	55.4
Scaffold_1091	NC_021529	81.481	54	10	0	845	898	227384	227331	1.16e-05	53.6
Scaffold_1091	NC_020873	80.328	61	11	1	938	997	157735	157675	1.16e-05	53.6
Scaffold_1091	NC_017974	79.032	62	13	0	937	998	144377	144438	1.16e-05	53.6
Scaffold_1091	NC_017974	78.667	75	13	3	938	1010	145610	145683	1.16e-05	53.6
Scaffold_1091	NC_017974	78.873	71	13	2	1406	1475	146810	146879	1.16e-05	53.6
Scaffold_1091	NC_017974	78.571	56	11	1	939	993	146810	146865	0.006	44.6
Scaffold_1091	NC_017969	81.356	59	10	1	1405	1462	31669	31611	1.16e-05	53.6
Scaffold_1091	NC_017969	81.356	59	8	2	844	899	31318	31260	4.03e-05	51.8
Scaffold_1091	NC_005260	79.688	64	12	1	832	895	108091	108029	1.16e-05	53.6
Scaffold_1091	NC_005260	93.103	29	2	0	1165	1193	96415	96387	0.006	44.6
Scaffold_1091	JN849462	80.702	57	11	0	937	993	177798	177742	1.16e-05	53.6
Scaffold_1091	JN849462	76.667	60	12	1	1135	1192	177491	177432	0.021	42.8
Scaffold_1091	GQ478082	81.481	54	10	0	939	992	14848	14901	1.16e-05	53.6
Scaffold_1091	NC_023688	74.118	85	21	1	1019	1103	93258	93175	4.03e-05	51.8
Scaffold_1091	NC_023688	78.333	60	12	1	936	994	94196	94137	0.002	46.4
Scaffold_1091	NC_023688	80	50	10	0	845	894	95838	95789	0.002	46.4
Scaffold_1091	NC_023688	77.193	57	13	0	1406	1462	94193	94137	0.006	44.6
Scaffold_1091	NC_023688	96.154	26	1	0	1165	1190	83805	83780	0.021	42.8
Scaffold_1091	NC_022965	81.034	58	10	1	939	996	5409	5465	4.03e-05	51.8
Scaffold_1091	NC_021530	80	60	11	1	936	994	155053	155112	4.03e-05	51.8
Scaffold_1091	NC_021530	76.812	69	14	1	1024	1090	18536	18604	0.000141	50
Scaffold_1091	NC_021530	77.049	61	13	1	632	692	14512	14571	0.006	44.6
Scaffold_1091	NC_020879	78.571	70	13	2	939	1007	65465	65397	4.03e-05	51.8
Scaffold_1091	NC_020879	87.179	39	5	0	838	876	63896	63858	0.000491	48.2
Scaffold_1091	NC_020879	78.947	57	11	1	937	992	65711	65655	0.002	46.4
Scaffold_1091	NC_020875	79.71	69	10	3	1219	1287	6715	6779	4.03e-05	51.8
Scaffold_1091	NC_019714	73.494	83	22	0	831	913	35170	35252	4.03e-05	51.8
Scaffold_1091	NC_019517	80.357	56	11	0	1405	1460	61271	61216	4.03e-05	51.8
Scaffold_1091	NC_019517	78.571	56	12	0	939	994	61433	61378	0.000491	48.2
Scaffold_1091	NC_019406	80	60	11	1	1405	1463	61505	61564	4.03e-05	51.8
Scaffold_1091	NC_019406	77.966	59	13	0	1405	1463	61666	61724	0.000491	48.2
Scaffold_1091	NC_019406	78.431	51	11	0	939	989	68618	68668	0.021	42.8
Scaffold_1091	NC_019406	92.857	28	2	0	1164	1191	109420	109393	0.021	42.8
Scaffold_1091	NC_018843	81.818	55	9	1	939	993	42532	42585	4.03e-05	51.8
Scaffold_1091	NC_018837	86.047	43	6	0	955	997	34532	34490	4.03e-05	51.8
Scaffold_1091	NC_018837	77.143	70	15	1	845	913	35230	35161	4.03e-05	51.8
Scaffold_1091	NC_018837	77.966	59	13	0	842	900	27005	26947	0.000491	48.2
Scaffold_1091	NC_016653	79.31	58	12	0	939	996	44968	45025	4.03e-05	51.8
Scaffold_1091	NC_009816	78.261	69	12	2	1324	1390	50603	50536	4.03e-05	51.8
Scaffold_1091	NC_001335	81.034	58	10	1	939	996	4207	4263	4.03e-05	51.8
Scaffold_1091	KM083128	75	80	19	1	1395	1473	28553	28632	4.03e-05	51.8
Scaffold_1091	KM083128	90.323	31	3	0	1156	1186	28905	28935	0.021	42.8
Scaffold_1091	JX181824	76.056	71	17	0	937	1007	145589	145659	4.03e-05	51.8
Scaffold_1091	HE983844	80.357	56	11	0	939	994	560	615	4.03e-05	51.8
Scaffold_1091	HE983844	75.758	66	15	1	1323	1387	718	783	0.006	44.6
Scaffold_1091	AP013542	91.667	36	3	0	1220	1255	34505	34540	4.03e-05	51.8
Scaffold_1091	AP013455	86.047	43	6	0	836	878	7543	7501	4.03e-05	51.8
Scaffold_1091	AP013455	88.235	34	4	0	939	972	7534	7501	0.006	44.6
Scaffold_1091	6.66667e+06	81.034	58	10	1	939	996	5410	5466	4.03e-05	51.8
Scaffold_1091	NC_023579	80.702	57	10	1	938	993	41792	41848	0.000141	50
Scaffold_1091	NC_023579	78.182	55	12	0	845	899	41260	41314	0.002	46.4
Scaffold_1091	NC_019443	75.676	74	17	1	1018	1090	17903	17976	0.000141	50
Scaffold_1091	NC_019401	85.106	47	6	1	1019	1064	296174	296220	0.000141	50
Scaffold_1091	NC_019401	80.392	51	9	1	1019	1069	284185	284234	0.006	44.6
Scaffold_1091	NC_019401	76.19	63	13	1	1324	1384	313542	313604	0.006	44.6
Scaffold_1091	NC_019401	78.846	52	11	0	938	989	318216	318267	0.006	44.6
Scaffold_1091	NC_019401	78.431	51	11	0	939	989	324522	324572	0.021	42.8
Scaffold_1091	NC_016650	80	55	11	0	845	899	46650	46704	0.000141	50
Scaffold_1091	NC_012530	80.769	52	10	0	938	989	27825	27774	0.000141	50
Scaffold_1091	NC_012530	76.562	64	15	0	1487	1550	27827	27764	0.000491	48.2
Scaffold_1091	NC_012530	76.786	56	13	0	634	689	27825	27770	0.021	42.8
Scaffold_1091	KJ936628	79.032	62	12	1	933	994	29780	29720	0.000141	50
Scaffold_1091	KJ936628	78.571	56	12	0	845	900	29775	29720	0.000491	48.2
Scaffold_1091	KJ936628	69.903	103	31	0	1405	1507	29860	29758	0.002	46.4
Scaffold_1091	JQ684677	76.812	69	14	1	845	911	4138	4206	0.000141	50
Scaffold_1091	JQ684677	75.758	66	16	0	936	1001	4135	4200	0.000491	48.2
Scaffold_1091	AP013540	72.222	90	15	2	1217	1302	26569	26486	0.000141	50
Scaffold_1091	AP013460	80.328	61	10	2	939	997	17644	17584	0.000141	50
Scaffold_1091	AP013416	80	55	11	0	1139	1193	4967	4913	0.000141	50
Scaffold_1091	AP013413	80	55	11	0	1139	1193	36585	36639	0.000141	50
Scaffold_1091	6.66667e+06	76.812	69	14	1	845	911	4316	4384	0.000141	50
Scaffold_1091	6.66667e+06	75.758	66	16	0	936	1001	4313	4378	0.000491	48.2
Scaffold_1091	NC_022971	76.056	71	16	1	939	1008	44419	44349	0.000491	48.2
Scaffold_1091	NC_021534	78.571	56	12	0	1325	1380	46523	46578	0.000491	48.2
Scaffold_1091	NC_019929	80.357	56	10	1	939	993	170439	170494	0.000491	48.2
Scaffold_1091	NC_019929	78.431	51	11	0	635	685	169226	169276	0.021	42.8
Scaffold_1091	NC_019525	82.609	46	8	0	1428	1473	15211	15256	0.000491	48.2
Scaffold_1091	NC_010325	76.056	71	16	1	939	1008	44672	44602	0.000491	48.2
Scaffold_1091	NC_010325	78.947	57	10	2	939	994	44844	44789	0.021	42.8
Scaffold_1091	NC_007623	81.633	49	9	0	845	893	102953	103001	0.000491	48.2
Scaffold_1091	JX015524	76.471	68	14	1	845	910	4062	4129	0.000491	48.2
Scaffold_1091	JF957060	78.571	56	12	0	844	899	5380	5435	0.000491	48.2
Scaffold_1091	HM246724	79.31	58	11	1	939	995	13519	13462	0.000491	48.2
Scaffold_1091	FN667789	79.31	58	11	1	939	995	112374	112431	0.000491	48.2
Scaffold_1091	FN667788	79.31	58	11	1	939	995	111953	112010	0.000491	48.2
Scaffold_1091	AB609718	78.689	61	12	1	938	997	137048	136988	0.000491	48.2
Scaffold_1091	AB609718	76.471	68	15	1	833	899	138561	138494	0.000491	48.2
Scaffold_1091	NC_024137	85	40	6	0	1215	1254	32518	32557	0.002	46.4
Scaffold_1091	NC_019526	78.333	60	12	1	935	993	178306	178365	0.002	46.4
Scaffold_1091	NC_019526	82	50	8	1	850	898	182057	182106	0.002	46.4
Scaffold_1091	NC_017985	73.077	78	21	0	836	913	20269	20346	0.002	46.4
Scaffold_1091	NC_016564	100	25	0	0	1441	1465	10252	10276	0.002	46.4
Scaffold_1091	NC_012696	77.586	58	13	0	939	996	72527	72584	0.002	46.4
Scaffold_1091	NC_011421	80.702	57	9	2	1325	1381	28215	28269	0.002	46.4
Scaffold_1091	NC_006882	86.842	38	5	0	1018	1055	5858	5895	0.002	46.4
Scaffold_1091	NC_005344	73.077	78	21	0	836	913	36143	36220	0.002	46.4
Scaffold_1091	KM051843	75.385	65	16	0	841	905	129989	129925	0.002	46.4
Scaffold_1091	KM051843	77.586	58	13	0	939	996	132365	132308	0.002	46.4
Scaffold_1091	JX509734	72.289	83	23	0	831	913	35811	35893	0.002	46.4
Scaffold_1091	JX262376	73.333	75	20	0	931	1005	1082	1156	0.002	46.4
Scaffold_1091	AP013398	90.909	33	3	0	939	971	3597	3629	0.002	46.4
Scaffold_1091	AP011616	78.947	57	11	1	845	900	120181	120125	0.002	46.4
Scaffold_1091	AP011113	76.667	60	14	0	634	693	68922	68863	0.002	46.4
Scaffold_1091	NC_024139	79.31	58	9	2	939	993	31585	31528	0.006	44.6
Scaffold_1091	NC_021307	75.758	66	15	1	930	994	1679	1744	0.006	44.6
Scaffold_1091	NC_021307	76.786	56	13	0	845	900	1689	1744	0.021	42.8
Scaffold_1091	NC_018859	72.222	90	22	2	1306	1395	67695	67609	0.006	44.6
Scaffold_1091	NC_016656	90.625	32	3	0	1024	1055	12280	12311	0.006	44.6
Scaffold_1091	NC_015283	74.648	71	17	1	1024	1093	22123	22193	0.006	44.6
Scaffold_1091	NC_015269	79.31	58	9	2	939	993	31125	31068	0.006	44.6
Scaffold_1091	NC_014660	78.571	56	11	1	939	993	80480	80425	0.006	44.6
Scaffold_1091	NC_014660	76.786	56	13	0	937	992	79500	79445	0.021	42.8
Scaffold_1091	KJ743987	84.091	44	6	1	1437	1479	21186	21229	0.006	44.6
Scaffold_1091	KF554508	77.049	61	13	1	938	997	104	164	0.006	44.6
Scaffold_1091	AP013482	93.548	31	1	1	1313	1342	13640	13610	0.006	44.6
Scaffold_1091	AP013396	77.193	57	13	0	1405	1461	24282	24226	0.006	44.6
Scaffold_1091	NC_024366	76.786	56	13	0	845	900	829	884	0.021	42.8
Scaffold_1091	NC_024366	76.786	56	13	0	939	994	829	884	0.021	42.8
Scaffold_1091	NC_023568	76.667	60	12	1	1135	1192	113620	113561	0.021	42.8
Scaffold_1091	NC_023564	76.786	56	13	0	939	994	5591	5646	0.021	42.8
Scaffold_1091	NC_020079	71.795	78	22	0	1398	1475	60834	60911	0.021	42.8
Scaffold_1091	NC_018279	71.795	78	22	0	836	913	45756	45833	0.021	42.8
Scaffold_1091	NC_013644	73.973	73	18	1	929	1000	37495	37567	0.021	42.8
Scaffold_1091	NC_008203	74.242	66	17	0	936	1001	4246	4311	0.021	42.8
Scaffold_1091	KF030445	76.786	56	13	0	1325	1380	30302	30247	0.021	42.8
Scaffold_1091	KC295538	76.786	56	13	0	1128	1183	209015	208960	0.021	42.8
Scaffold_1091	JX483873	72.727	88	18	3	1027	1110	3699	3614	0.021	42.8
Scaffold_1091	FM180578	76.786	56	13	0	1325	1380	22540	22595	0.021	42.8
Scaffold_1091	AP013399	90.323	31	3	0	939	969	13805	13835	0.021	42.8
Scaffold_1091	AP013385	90.323	31	3	0	939	969	25437	25407	0.021	42.8
Scaffold_1091	AP013378	81.395	43	8	0	1347	1389	3386	3428	0.021	42.8
Scaffold_1091	6.66667e+06	76.786	56	13	0	845	900	595	650	0.021	42.8
Scaffold_1091	6.66667e+06	76.786	56	13	0	939	994	595	650	0.021	42.8
Scaffold_10910	KF296717	79.73	74	12	2	902	973	42425	42353	9.91e-08	60.8
Scaffold_10912	NC_007021	92.593	27	2	0	129	155	117407	117433	0.019	41
Scaffold_10914	NC_024356	88.571	35	3	1	328	362	25623	25656	0.009	42.8
Scaffold_10914	NC_023719	82.222	45	7	1	430	473	97332	97376	0.009	42.8
Scaffold_10914	NC_023568	88.235	34	3	1	344	376	114524	114557	0.033	41
Scaffold_10914	NC_015262	88.889	36	1	2	500	532	24665	24630	0.033	41
Scaffold_1092	NC_021072	86.111	72	10	0	355	426	35582	35511	9.72e-16	86
Scaffold_1092	NC_021072	69.784	139	32	5	361	497	35964	35834	0.000244	48.2
Scaffold_1092	HQ317290	84.416	77	12	0	350	426	18124	18200	9.72e-16	86
Scaffold_1092	HQ317290	82.812	64	10	1	359	421	161243	161306	1.11e-08	62.6
Scaffold_1092	HQ317290	69.93	143	32	5	361	501	17940	18073	2e-05	51.8
Scaffold_1092	NC_015279	76.147	109	19	2	354	462	141254	141355	5.03e-13	77
Scaffold_1092	NC_019516	71.429	140	33	1	360	499	26449	26581	1.76e-12	75.2
Scaffold_1092	NC_016158	77.419	93	17	1	347	435	44351	44443	6.13e-12	73.4
Scaffold_1092	6.66667e+06	86.441	59	8	0	361	419	94458	94516	2.14e-11	71.6
Scaffold_1092	6.66667e+06	75.439	57	14	0	361	417	91132	91188	0.036	41
Scaffold_1092	NC_021536	79.487	78	16	0	349	426	9891	9968	7.47e-11	69.8
Scaffold_1092	NC_021536	71.329	143	31	5	361	501	9703	9837	3.87e-08	60.8
Scaffold_1092	NC_021536	79.688	64	12	1	359	421	147057	147120	5.74e-06	53.6
Scaffold_1092	NC_018861	75.962	104	22	2	362	462	88857	88754	7.47e-11	69.8
Scaffold_1092	NC_008720	85.455	55	8	0	361	415	32457	32511	3.18e-09	64.4
Scaffold_1092	NC_008720	76.364	55	13	0	444	498	32632	32686	0.036	41
Scaffold_1092	6.66667e+06	74.51	102	20	2	361	462	5402	5497	3.18e-09	64.4
Scaffold_1092	NC_022965	75.728	103	18	4	361	462	5408	5504	1.11e-08	62.6
Scaffold_1092	NC_016562	75.238	105	22	3	362	462	38515	38411	1.11e-08	62.6
Scaffold_1092	NC_015464	77.215	79	18	0	354	432	86054	85976	1.11e-08	62.6
Scaffold_1092	KF148616	75.238	105	22	3	362	462	38749	38645	1.11e-08	62.6
Scaffold_1092	FR823450	75.238	105	22	3	362	462	89960	90064	1.11e-08	62.6
Scaffold_1092	6.66667e+06	75.728	103	18	4	361	462	5409	5505	1.11e-08	62.6
Scaffold_1092	NC_019929	74.038	104	23	2	398	498	169773	169875	3.87e-08	60.8
Scaffold_1092	NC_019929	72.277	101	25	3	400	498	170395	170494	0.000852	46.4
Scaffold_1092	NC_019503	83.929	56	9	0	361	416	69192	69137	3.87e-08	60.8
Scaffold_1092	NC_019399	83.929	56	9	0	361	416	68381	68326	3.87e-08	60.8
Scaffold_1092	JX128259	83.929	56	9	0	361	416	68567	68512	3.87e-08	60.8
Scaffold_1092	HE956711	83.929	56	9	0	361	416	68956	68901	3.87e-08	60.8
Scaffold_1092	HE956711	72.727	99	20	3	404	499	69249	69155	7e-05	50
Scaffold_1092	AP011113	83.929	56	9	0	361	416	68666	68611	3.87e-08	60.8
[truncated: 54,305 more rows]

## Sheet: MA
Supplementary Table S6. MetaPhinder derived identification of bacteriophage signatures in the metagenomics scaffolds (MA)
query acc.ver	subject acc.ver	% identity	alignment length	mismatches	gap opens	q. start	q. end	s. start	s. end	evalue	bit score
Scaffold_1	HQ641352	74.648	71	17	1	3445	3514	6783	6853	0.016	44.6
Scaffold_1	HQ641348	74.648	71	17	1	3445	3514	6632	6702	0.016	44.6
Scaffold_10	NC_023719	68.182	198	57	3	20	214	189394	189588	4.35e-10	66.2
Scaffold_100	NC_022918	86.957	46	4	2	464	507	120195	120150	0.002	50
Scaffold_100	NC_019726	86.957	46	4	2	464	507	114267	114312	0.002	50
Scaffold_100	EU418428	86.957	46	4	2	464	507	116444	116399	0.002	50
Scaffold_100	AY176327	86.957	46	4	2	464	507	109387	109342	0.002	50
Scaffold_100	NC_006884	81.132	53	6	2	8965	9013	123579	123631	0.018	46.4
Scaffold_10000	NC_007581	85.294	34	5	0	223	256	34973	34940	0.047	39.2
Scaffold_10000	KF302036	100	21	0	0	278	298	25362	25382	0.047	39.2
Scaffold_10000	AP013454	84.211	38	5	1	234	271	3706	3670	0.047	39.2
Scaffold_10002	NC_007021	100	22	0	0	276	297	18246	18267	0.018	41
Scaffold_10003	NC_019782	90.323	31	3	0	2813	2843	2007	2037	0.046	42.8
Scaffold_10008	NZ_ACSJ01000017	87.234	47	3	3	93	137	34545	34500	0.000152	48.2
Scaffold_10008	NC_023719	78.689	61	5	4	117	171	85019	84961	0.023	41
Scaffold_10008	NC_016163	93.103	29	1	1	517	544	131193	131221	0.023	41
Scaffold_10010	AP013440	81.818	44	8	0	1141	1184	32283	32326	0.005	44.6
Scaffold_10011	NC_017969	71.875	96	19	4	307	396	69008	68915	0.017	41
Scaffold_10013	AP013393	83.721	43	5	1	3155	3197	35438	35478	0.017	44.6
Scaffold_10015	NC_013696	75	68	16	1	160	227	34361	34427	0.004	42.8
Scaffold_10015	KC438283	82.5	40	7	0	286	325	23138	23177	0.013	41
Scaffold_10018	NC_012784	65.655	527	162	10	855	1370	4383	3865	5.41e-22	107
Scaffold_10018	NC_012784	65.644	326	107	3	855	1176	6487	6163	3.2e-12	75.2
Scaffold_10018	NC_005356	67.791	326	100	3	855	1176	26881	26557	1.89e-21	105
Scaffold_10018	NC_005356	65.337	326	108	3	855	1176	28504	28180	1.36e-10	69.8
Scaffold_10018	NC_021865	65.415	506	149	11	871	1369	27923	27437	2.8e-19	98.7
Scaffold_10018	KJ596420	68.821	263	77	3	855	1113	5312	5051	9.77e-19	96.9
Scaffold_10018	NC_013696	67.097	310	97	3	872	1177	30601	30293	4.16e-17	91.5
Scaffold_10018	NZ_ACSJ01000017	72.626	179	43	4	1157	1332	62819	62644	1.45e-16	89.7
Scaffold_10018	KC595514	65.275	455	142	8	865	1311	13377	12931	5.06e-16	87.8
Scaffold_10018	NC_013195	65.749	327	107	3	854	1176	6124	5799	9.15e-13	77
Scaffold_10018	NC_011104	66.791	268	75	4	869	1129	26433	26173	9.15e-13	77
Scaffold_10018	NC_008689	65.644	326	107	3	855	1176	5316	4992	3.2e-12	75.2
Scaffold_10018	NC_011222	86.667	60	8	0	1273	1332	25212	25153	1.12e-11	73.4
Scaffold_10018	NC_011614	64.917	362	112	5	829	1176	4884	4524	3.89e-11	71.6
Scaffold_10018	NC_008583	65.443	327	108	3	854	1176	5244	4919	3.89e-11	71.6
Scaffold_10018	NC_007061	65.443	327	108	3	854	1176	32570	32245	3.89e-11	71.6
Scaffold_10018	NC_021326	65.337	326	108	3	855	1176	40635	40959	1.36e-10	69.8
Scaffold_10018	NC_008617	65.337	326	108	3	855	1176	5853	5529	1.36e-10	69.8
Scaffold_10018	NC_007060	65.337	326	108	3	855	1176	31793	31469	1.36e-10	69.8
Scaffold_10018	NC_007059	65.337	326	108	3	855	1176	31831	31507	1.36e-10	69.8
Scaffold_10018	NC_007058	65.337	326	108	3	855	1176	31371	31047	1.36e-10	69.8
Scaffold_10018	NC_003288	65.506	316	104	3	865	1176	5608	5294	1.36e-10	69.8
Scaffold_10018	KF831354	65.337	326	108	3	855	1176	36911	37235	1.36e-10	69.8
Scaffold_10018	JX274646	65.337	326	108	3	855	1176	4889	4565	1.36e-10	69.8
Scaffold_10018	DQ530362	65.337	326	108	3	855	1176	5289	4965	1.36e-10	69.8
Scaffold_10018	AP011956	65.337	326	108	3	855	1176	6395	6071	1.36e-10	69.8
Scaffold_10018	NC_021861	70.714	140	41	0	1220	1359	1702	1563	4.74e-10	68
Scaffold_10018	NC_020883	72.881	118	31	1	1067	1183	12899	12782	1.66e-09	66.2
Scaffold_10018	NC_020883	69.737	152	44	2	1328	1478	12632	12482	7.04e-08	60.8
Scaffold_10018	NC_018284	65.287	314	104	3	867	1176	30276	29964	1.66e-09	66.2
Scaffold_10018	AJ245616	73.109	119	28	2	1216	1332	30227	30111	1.66e-09	66.2
Scaffold_10018	NC_011398	64.725	309	104	2	871	1175	37767	37460	2.02e-08	62.6
Scaffold_10018	NC_009231	64.537	313	106	2	871	1179	38994	38683	7.04e-08	60.8
Scaffold_10018	NC_007047	64.724	326	110	3	855	1176	28554	28230	7.04e-08	60.8
Scaffold_10018	NC_013597	70.455	132	31	3	1419	1546	26179	26306	8.57e-07	57.2
Scaffold_10018	KJ564036	69.403	134	41	0	872	1005	26675	26542	8.57e-07	57.2
Scaffold_10018	KJ564036	65.241	187	62	1	938	1121	27532	27346	0.019	42.8
Scaffold_10018	NC_004302	72.269	119	26	4	1216	1332	3639	3526	2.99e-06	55.4
Scaffold_10018	NC_019782	67.052	173	54	1	893	1062	28587	28415	1.04e-05	53.6
Scaffold_10018	NC_019421	67.808	146	47	0	871	1016	35977	35832	3.65e-05	51.8
Scaffold_10018	NC_013645	66.415	265	78	8	869	1126	24536	24276	3.65e-05	51.8
Scaffold_10018	NC_015252	78.947	57	12	0	871	927	24949	24893	0.000127	50
Scaffold_10018	NC_007917	67.586	145	47	0	872	1016	35020	34876	0.000127	50
Scaffold_10018	NC_004827	78.333	60	13	0	1419	1478	16929	16870	0.000127	50
Scaffold_10018	KC348602	65.502	229	74	3	871	1095	29048	29275	0.000444	48.2
Scaffold_10018	NC_022776	75.676	74	16	2	1054	1126	2700	2628	0.002	46.4
Scaffold_10018	NC_020197	75.676	74	16	2	1054	1126	3361	3289	0.002	46.4
Scaffold_10018	KJ564037	67.692	130	39	1	938	1064	27948	27819	0.005	44.6
Scaffold_10018	NC_014457	85	40	5	1	824	863	25348	25310	0.019	42.8
Scaffold_1002	NC_021803	85	40	5	1	1536	1574	15005	14966	0.024	42.8
Scaffold_10021	NC_015289	83.333	36	6	0	196	231	100927	100962	0.033	39.2
Scaffold_10022	NC_004629	93.103	29	1	1	474	501	24959	24987	0.022	41
Scaffold_10022	6.66667e+06	87.5	32	4	0	286	317	9508	9539	0.022	41
Scaffold_10032	NC_024370	86.842	38	4	1	2706	2742	34257	34220	0.034	42.8
Scaffold_10036	NC_001884	93.904	935	57	0	21	955	104340	103406	0	1429
Scaffold_10043	NC_010353	80.851	47	6	1	121	167	9605	9562	0.008	42.8
Scaffold_10043	NC_007019	80.851	47	6	1	121	167	9597	9554	0.008	42.8
Scaffold_10043	AP011616	82.5	40	7	0	207	246	67690	67729	0.027	41
Scaffold_10049	AP013545	90	30	3	0	673	702	10387	10358	0.046	41
Scaffold_10051	NC_021539	79.31	58	9	2	194	251	95	149	0.001	44.6
Scaffold_10054	AP013444	87.879	33	4	0	164	196	3017	2985	0.004	42.8
Scaffold_10054	NC_023719	100	21	0	0	257	277	138046	138026	0.044	39.2
Scaffold_10054	NC_009813	100	21	0	0	46	66	32396	32376	0.044	39.2
Scaffold_10054	HM246721	74.286	70	15	2	130	199	30623	30557	0.044	39.2
Scaffold_10054	FN667789	74.286	70	15	2	130	199	14805	14871	0.044	39.2
Scaffold_10054	FN667788	74.286	70	15	2	130	199	13358	13424	0.044	39.2
Scaffold_10056	JX306041	82.927	41	4	1	408	445	55499	55539	0.02	41
Scaffold_10056	233894	82.927	41	4	1	408	445	51861	51901	0.02	41
Scaffold_1006	NC_024387	90.909	33	3	0	13072	13104	24818	24786	0.013	46.4
Scaffold_1006	NC_021539	90.909	33	3	0	13072	13104	20862	20830	0.013	46.4
Scaffold_1006	NC_009812	90.909	33	3	0	13072	13104	25319	25287	0.013	46.4
Scaffold_1006	NC_003291	90.909	33	3	0	13072	13104	20585	20553	0.013	46.4
Scaffold_1006	NC_023719	93.103	29	2	0	4730	4758	17681	17653	0.047	44.6
Scaffold_1006	NC_019542	84.444	45	4	2	3508	3552	14981	15022	0.047	44.6
Scaffold_1006	FN667789	88.889	36	3	1	11512	11547	80683	80717	0.047	44.6
Scaffold_10061	AP013459	88.889	36	1	1	1078	1113	37304	37336	0.002	46.4
Scaffold_10061	NC_023734	85	40	5	1	385	423	2334	2373	0.026	42.8
Scaffold_10064	NC_023500	85.366	41	5	1	1615	1655	11709	11670	0.009	44.6
Scaffold_10064	NC_021326	85.366	41	5	1	1615	1655	32972	33011	0.009	44.6
Scaffold_10064	NC_014792	83.333	42	7	0	784	825	159910	159951	0.009	44.6
Scaffold_10064	NC_014595	83.333	42	7	0	784	825	161510	161551	0.009	44.6
Scaffold_10064	NC_008689	85.366	41	5	1	1615	1655	13311	13272	0.009	44.6
Scaffold_10064	NC_007064	85.366	41	5	1	1615	1655	36706	36667	0.009	44.6
Scaffold_10064	NC_007063	85.366	41	5	1	1615	1655	37509	37470	0.009	44.6
Scaffold_10064	NC_007048	85.366	41	5	1	1615	1655	37826	37787	0.009	44.6
Scaffold_10064	NC_003288	85.366	41	5	1	1615	1655	12049	12010	0.009	44.6
Scaffold_10064	DQ908929	85.366	41	5	1	1615	1655	10634	10595	0.009	44.6
Scaffold_10064	NC_007581	96.154	26	1	0	207	232	29770	29745	0.032	42.8
Scaffold_10064	AP013425	92.857	28	2	0	2513	2540	31237	31264	0.032	42.8
Scaffold_10067	NC_022767	73.81	84	22	0	245	328	62559	62642	8.66e-06	53.6
Scaffold_10067	NC_022767	68.333	120	38	0	976	1095	62898	63017	0.001	46.4
Scaffold_10067	DQ004855	69.697	99	30	0	1180	1278	56023	55925	0.004	44.6
Scaffold_10068	NC_020490	88.571	35	4	0	1415	1449	28017	28051	0.002	46.4
Scaffold_1007	NC_023719	90.323	31	3	0	708	738	116357	116327	0.009	42.8
Scaffold_1007	NC_005282	77.358	53	8	1	303	351	20107	20159	0.031	41
Scaffold_1007	HM368260	92.593	27	2	0	121	147	21121	21095	0.031	41
Scaffold_1007	GU169904	77.358	53	8	1	303	351	143258	143310	0.031	41
Scaffold_1007	AP013388	87.5	32	4	0	367	398	3989	3958	0.031	41
Scaffold_10071	NC_019526	86.111	36	5	0	10	45	111992	111957	0.008	42.8
Scaffold_10072	NC_017975	90.323	31	3	0	187	217	138298	138268	0.004	42.8
Scaffold_10076	HM246720	80.952	42	8	0	6	47	21564	21523	0.017	41
Scaffold_10076	AP013540	78.723	47	10	0	16	62	8204	8158	0.017	41
Scaffold_10078	NC_004586	73.198	541	142	2	143	680	19060	18520	3.59e-85	316
Scaffold_10078	NC_004586	71.631	141	40	0	816	956	18364	18224	1.99e-12	75.2
Scaffold_10078	NC_005822	70.814	651	180	6	246	893	17967	17324	2.76e-80	300
Scaffold_10078	NC_004302	69.739	651	187	6	246	893	19490	18847	1.63e-70	268
Scaffold_10078	NC_004996	66.534	756	230	9	212	947	21529	20777	5.69e-51	203
Scaffold_10078	KC348602	68.856	472	147	0	212	683	13972	14443	1.25e-46	188
Scaffold_10078	KC348601	68.856	472	147	0	212	683	14340	14811	1.25e-46	188
Scaffold_10078	KC348600	75.641	78	19	0	816	893	18105	18182	1.86e-06	55.4
Scaffold_10078	KF302034	90.625	32	3	0	677	708	100637	100606	0.003	44.6
Scaffold_10079	NC_023688	87.5	32	4	0	782	813	104446	104415	0.043	41
Scaffold_1008	HM246722	80.769	52	9	1	29584	29634	16132	16183	0.034	46.4
Scaffold_10080	AP013393	92.593	27	2	0	104	130	17884	17910	0.021	41
Scaffold_10081	NC_007581	87.5	32	4	0	541	572	44941	44910	0.026	41
Scaffold_10081	NC_007581	87.5	32	4	0	541	572	46331	46300	0.026	41
Scaffold_10082	NC_009814	100	22	0	0	264	285	31839	31818	0.022	41
Scaffold_10086	KF296717	78.431	51	9	1	290	340	4794	4746	0.038	41
Scaffold_10086	KC595511	76.119	67	10	3	295	355	78369	78303	0.038	41
Scaffold_1009	KF296717	78.049	82	16	2	32323	32403	39533	39613	2.82e-06	60.8
Scaffold_1009	NC_023719	94.118	34	2	0	20880	20913	471548	471581	0.000419	53.6
Scaffold_10090	NC_015250	100	22	0	0	514	535	51545	51566	0.028	41
Scaffold_10091	AB609718	66.379	812	260	9	111	914	133019	133825	3.22e-51	205
Scaffold_10091	NC_023574	65.979	776	254	7	3	773	68701	67931	8.65e-46	187
Scaffold_10091	NC_015253	73.092	249	67	0	12	260	83209	82961	7.58e-34	147
Scaffold_10091	NC_015253	75	96	24	0	261	356	82633	82538	2.04e-09	66.2
Scaffold_10091	NC_023719	66.372	565	172	12	134	689	54558	54003	2.48e-27	125
Scaffold_10091	NC_015263	68.267	375	111	7	403	773	64279	63909	1.28e-24	116
Scaffold_10091	KC595511	65.347	505	167	6	30	530	58854	59354	2.83e-20	102
Scaffold_10091	NC_020081	68.127	251	76	4	654	902	62066	62314	3.23e-13	78.8
Scaffold_10091	NC_001884	73.387	124	33	0	122	245	121943	121820	3.93e-12	75.2
Scaffold_10091	NC_022771	67.616	281	83	8	619	895	87991	87715	5.84e-10	68
Scaffold_10091	NC_021856	67.616	281	83	8	619	895	91658	91382	5.84e-10	68
Scaffold_10091	NC_019487	70.769	130	34	4	786	913	103378	103251	0.000157	50
Scaffold_10097	NC_020843	80.952	42	8	0	6	47	90448	90407	0.012	41
Scaffold_101	NC_021529	86	50	4	2	331	379	235496	235449	3.02e-06	53.6
Scaffold_101	NC_020873	96.667	30	0	1	329	357	72709	72680	0.000448	46.4
Scaffold_101	NC_023568	85.366	41	4	1	319	359	19540	19578	0.002	44.6
Scaffold_101	NC_024137	93.333	30	1	1	329	357	113196	113225	0.005	42.8
Scaffold_101	NC_024137	83.784	37	6	0	321	357	7651	7687	0.019	41
Scaffold_101	NC_022769	92.857	28	2	0	330	357	155825	155852	0.005	42.8
Scaffold_101	NC_018270	86.842	38	4	1	318	355	33107	33071	0.005	42.8
Scaffold_101	NC_018270	86.842	38	4	1	318	355	33208	33172	0.005	42.8
Scaffold_101	NC_018270	86.842	38	4	1	318	355	33309	33273	0.005	42.8
Scaffold_101	NC_006936	86.842	38	4	1	169	205	36347	36310	0.005	42.8
Scaffold_101	NC_006565	96.154	26	1	0	330	355	1005	1030	0.005	42.8
Scaffold_101	KJ489402	92.857	28	2	0	330	357	153830	153857	0.005	42.8
Scaffold_101	6.66667e+06	92.857	28	2	0	330	357	35609	35582	0.005	42.8
Scaffold_101	6.66667e+06	100	22	0	0	336	357	30945	30924	0.019	41
Scaffold_101	NC_020081	87.5	32	4	0	324	355	5745	5714	0.019	41
Scaffold_101	NC_012740	96	25	1	0	334	358	162171	162147	0.019	41
Scaffold_1010	KF296717	85.106	47	7	0	7267	7313	1856	1810	9.46e-05	53.6
Scaffold_1010	KC295538	89.189	37	4	0	1735	1771	344340	344376	0.001	50
Scaffold_1010	NC_021530	85.366	41	6	0	5309	5349	77810	77770	0.004	48.2
Scaffold_1010	AP013430	89.189	37	3	1	4587	4623	5028	4993	0.014	46.4
Scaffold_10101	NC_015290	92.593	27	2	0	299	325	26833	26859	0.035	41
Scaffold_10103	NC_010583	88.235	34	4	0	280	313	30468	30435	0.007	44.6
Scaffold_10105	AP013561	90.323	31	3	0	950	980	16844	16814	0.022	42.8
Scaffold_10107	NC_001884	100	21	0	0	122	142	21594	21614	0.044	39.2
Scaffold_10109	NC_007581	87.5	32	4	0	65	96	20400	20369	0.008	41
Scaffold_1011	NC_016564	75.758	66	16	0	1293	1358	18936	19001	0.001	48.2
Scaffold_10110	NC_007581	87.5	32	4	0	454	485	109103	109134	0.021	41
Scaffold_10111	NC_018855	86.486	37	4	1	250	285	69773	69809	0.011	41
Scaffold_10111	KF562341	86.486	37	4	1	250	285	36235	36199	0.011	41
Scaffold_10112	KF296717	67.304	523	159	8	237	756	1394	1907	9.69e-34	147
Scaffold_10117	NC_023719	69.167	120	37	0	133	252	80723	80842	0.000101	50
Scaffold_10118	NC_019529	88.235	34	4	0	525	558	107986	107953	0.005	44.6
Scaffold_1012	AP013406	80.702	57	9	2	2849	2903	21630	21574	0.004	46.4
Scaffold_1012	NC_018861	85.366	41	4	1	2119	2157	76893	76853	0.015	44.6
Scaffold_10120	NC_024144	92.857	28	2	0	632	659	7004	7031	0.013	42.8
Scaffold_10120	NC_009231	92.857	28	2	0	632	659	6789	6816	0.013	42.8
Scaffold_10120	NC_007048	80	45	9	0	679	723	5001	5045	0.045	41
Scaffold_10120	NC_004615	80	45	9	0	679	723	21427	21471	0.045	41
Scaffold_10122	AP013413	83.333	36	6	0	194	229	30570	30535	0.036	39.2
Scaffold_10123	NC_019507	96.154	26	1	0	383	408	106547	106522	0.008	42.8
Scaffold_10123	NC_019448	76.389	72	14	3	16	85	132415	132345	0.008	42.8
Scaffold_10123	HM246721	96.154	26	1	0	383	408	31632	31657	0.008	42.8
Scaffold_10123	FN667789	96.154	26	1	0	383	408	14105	14080	0.008	42.8
Scaffold_10123	FN667788	96.154	26	1	0	383	408	12349	12324	0.008	42.8
Scaffold_10124	NC_021559	91.667	36	3	0	219	254	83901	83936	8.48e-06	51.8
Scaffold_10124	NC_006884	91.667	36	3	0	219	254	4079	4114	8.48e-06	51.8
Scaffold_10126	NC_019523	100	23	0	0	165	187	5758	5736	0.005	42.8
Scaffold_1013	NC_016656	83.784	37	6	0	489	525	30757	30793	0.037	41
Scaffold_10132	JF501022	100	21	0	0	181	201	9036	9056	0.037	39.2
Scaffold_10134	NC_009810	67.485	326	106	0	923	1248	31112	31437	5.43e-23	111
Scaffold_10134	NC_009810	84.615	39	6	0	1296	1334	31506	31544	0.007	44.6
Scaffold_10134	NC_004996	69.88	249	63	3	1108	1356	8279	8515	1.89e-22	109
Scaffold_10134	NC_013696	70.466	193	52	3	1172	1360	34202	34393	2.63e-14	82.4
Scaffold_10134	NC_023559	67.01	291	88	6	923	1209	5668	5954	1.36e-11	73.4
Scaffold_10134	NC_023571	70.807	161	43	4	1051	1209	5791	5949	7.06e-09	64.4
Scaffold_10134	NC_023560	70.807	161	43	4	1051	1209	5790	5948	7.06e-09	64.4
Scaffold_10134	NC_011801	90.476	42	4	0	1621	1662	31476	31517	3e-07	59
Scaffold_10134	NC_008723	65.075	335	102	9	881	1209	36145	36470	0.000156	50
Scaffold_10134	NC_019915	64.526	327	103	8	881	1202	7719	8037	0.023	42.8
Scaffold_10134	NC_018857	93.333	30	1	1	331	359	142908	142879	0.023	42.8
Scaffold_10134	NC_018284	64.985	337	100	11	872	1202	33031	33355	0.023	42.8
Scaffold_10134	JX409894	75.758	66	12	2	1616	1677	40895	40830	0.023	42.8
Scaffold_10136	NC_010353	76.389	72	13	2	870	940	26955	26887	0.000344	48.2
Scaffold_10136	NC_007019	76.389	72	13	2	870	940	26377	26309	0.000344	48.2
Scaffold_10136	NC_002214	76.389	72	13	2	870	940	29403	29335	0.000344	48.2
Scaffold_10136	NC_000871	76.389	72	13	2	870	940	26650	26582	0.000344	48.2
Scaffold_1014	NC_023719	70.181	332	99	0	52757	53088	189200	188869	1.02e-33	152
Scaffold_1014	NC_023719	67.029	276	83	5	52382	52653	189587	189316	7.86e-10	73.4
Scaffold_1014	NC_023719	83.077	65	10	1	61059	61123	404010	403947	4.07e-07	64.4
Scaffold_1014	NC_007051	67.708	480	137	10	9498	9965	21761	21288	2.25e-29	138
Scaffold_1014	NC_007051	89.474	38	4	0	14219	14256	17716	17679	0.003	51.8
Scaffold_1014	NC_021773	64.227	847	267	20	28647	29472	29899	29068	4.64e-19	104
Scaffold_1014	NC_021773	76.19	84	18	2	19416	19498	39605	39523	0.000211	55.4
Scaffold_1014	NC_021773	73.256	86	23	0	32072	32157	28289	28204	0.003	51.8
Scaffold_1014	NC_020883	72.881	177	48	0	19349	19525	37702	37526	4.64e-19	104
Scaffold_1014	NC_008689	63.868	786	251	17	28705	29472	19729	18959	2.93e-15	91.5
Scaffold_1014	NC_008689	76.19	84	18	2	19416	19498	29497	29415	0.000211	55.4
Scaffold_1014	NC_008689	76.812	69	16	0	18662	18730	30242	30174	0.000736	53.6
Scaffold_1014	NC_008689	73.256	86	23	0	32072	32157	18180	18095	0.003	51.8
Scaffold_1014	NC_012784	63.74	786	252	17	28705	29472	21046	20276	1.25e-13	86
Scaffold_1014	NC_012784	76.19	84	18	2	19416	19498	30813	30731	0.000211	55.4
Scaffold_1014	NC_012784	76.812	69	16	0	18662	18730	31558	31490	0.000736	53.6
Scaffold_1014	NC_012784	73.256	86	23	0	32072	32157	19497	19412	0.003	51.8
Scaffold_1014	NC_023587	88.525	61	7	0	61063	61123	152568	152508	1.85e-11	78.8
Scaffold_1014	NC_023587	74.667	75	19	0	60238	60312	152575	152501	0.009	50
Scaffold_1014	NC_015281	86.885	61	7	1	61063	61123	164074	164015	2.74e-09	71.6
Scaffold_1014	NC_015281	81.034	58	10	1	60248	60305	164071	164015	0.003	51.8
Scaffold_1014	NC_020851	85.246	61	9	0	61063	61123	54011	54071	9.58e-09	69.8
Scaffold_1014	NC_008206	79.762	84	14	2	61042	61123	62227	62145	9.58e-09	69.8
Scaffold_1014	NC_015254	68.018	222	65	4	9582	9800	21446	21228	3.34e-08	68
Scaffold_1014	NC_013085	85.714	56	8	0	61067	61122	32023	32078	1.17e-07	66.2
Scaffold_1014	NC_013085	77.419	62	14	0	60243	60304	32017	32078	0.009	50
Scaffold_1014	NC_023561	85	60	8	1	61064	61122	72372	72431	4.07e-07	64.4
Scaffold_1014	NC_023561	81.967	61	10	1	60245	60304	72371	72431	6.04e-05	57.2
Scaffold_1014	NC_015251	83.333	60	10	0	61067	61126	112265	112206	4.07e-07	64.4
Scaffold_1014	NC_015251	79.661	59	12	0	60246	60304	112268	112210	0.000736	53.6
Scaffold_1014	NC_023006	84.211	57	9	0	61067	61123	21077	21133	1.42e-06	62.6
Scaffold_1014	NC_018861	79.71	69	14	0	61063	61131	88714	88782	1.42e-06	62.6
Scaffold_1014	NC_016562	79.71	69	14	0	61063	61131	38371	38439	1.42e-06	62.6
Scaffold_1014	NC_015286	83.607	61	9	1	61063	61123	163978	163919	1.42e-06	62.6
Scaffold_1014	NC_008296	84.211	57	9	0	61067	61123	162324	162268	1.42e-06	62.6
Scaffold_1014	NC_008296	78.947	57	12	0	60249	60305	162324	162268	0.009	50
Scaffold_1014	KF148616	79.71	69	14	0	61063	61131	38605	38673	1.42e-06	62.6
Scaffold_1014	KF030445	83.051	59	10	0	61067	61125	30247	30305	1.42e-06	62.6
Scaffold_1014	FR823450	79.71	69	14	0	61063	61131	90104	90036	1.42e-06	62.6
Scaffold_1014	FM180578	83.051	59	10	0	61067	61125	22595	22537	1.42e-06	62.6
Scaffold_1014	NC_019529	83.929	56	9	0	61067	61122	45298	45243	4.96e-06	60.8
Scaffold_1014	NC_019529	78.571	56	12	0	60249	60304	45298	45243	0.031	48.2
Scaffold_1014	EU418428	85.455	55	7	1	9584	9637	34598	34652	4.96e-06	60.8
Scaffold_1014	AY176327	85.455	55	7	1	9584	9637	27548	27602	4.96e-06	60.8
Scaffold_1014	NC_019915	79.104	67	14	0	18665	18731	26949	26883	1.73e-05	59
Scaffold_1014	NC_019538	81.667	60	11	0	61067	61126	198675	198616	1.73e-05	59
Scaffold_1014	NC_019538	78.571	56	12	0	60249	60304	198675	198620	0.031	48.2
Scaffold_1014	NC_019516	82.456	57	10	0	61067	61123	17110	17054	1.73e-05	59
Scaffold_1014	NC_019516	77.778	63	14	0	60243	60305	17116	17054	0.003	51.8
Scaffold_1014	NC_015279	82.456	57	10	0	61067	61123	141016	140960	1.73e-05	59
Scaffold_1014	KJ596420	75.294	85	21	0	17762	17846	30086	30002	1.73e-05	59
Scaffold_1014	KJ596420	76.812	69	16	0	18662	18730	28766	28698	0.000736	53.6
Scaffold_1014	KF831354	75.294	85	21	0	17762	17846	12941	13025	1.73e-05	59
Scaffold_1014	NC_021782	82.143	56	10	0	61067	61122	63089	63034	6.04e-05	57.2
Scaffold_1014	NC_021772	82.143	56	10	0	61067	61122	68220	68165	6.04e-05	57.2
Scaffold_1014	NC_021534	82.143	56	10	0	61067	61122	46578	46523	6.04e-05	57.2
Scaffold_1014	NC_018846	81.356	59	11	0	61067	61125	23829	23771	6.04e-05	57.2
Scaffold_1014	NC_015287	82.143	56	10	0	61067	61122	216637	216582	6.04e-05	57.2
Scaffold_1014	NC_015287	78.571	56	12	0	61067	61122	216559	216504	0.031	48.2
Scaffold_1014	NC_013195	72.441	127	27	5	17724	17846	31404	31282	6.04e-05	57.2
Scaffold_1014	NC_008617	72.441	127	27	5	17724	17846	30407	30285	6.04e-05	57.2
Scaffold_1014	NC_008464	81.356	59	11	0	61067	61125	60134	60076	6.04e-05	57.2
Scaffold_1014	NC_005356	72.441	127	27	5	17724	17846	12715	12593	6.04e-05	57.2
Scaffold_1014	NC_005135	82.143	56	10	0	61067	61122	65393	65448	6.04e-05	57.2
Scaffold_1014	NC_003356	81.356	59	11	0	61067	61125	17397	17339	6.04e-05	57.2
Scaffold_1014	NC_000924	81.356	59	11	0	61067	61125	21357	21299	6.04e-05	57.2
Scaffold_1014	HM208303	81.356	59	11	0	61067	61125	21916	21858	6.04e-05	57.2
Scaffold_1014	6.66667e+06	81.356	59	11	0	60246	60304	61948	61890	6.04e-05	57.2
Scaffold_1014	NC_022918	83.636	55	8	1	9584	9637	38585	38639	0.000211	55.4
Scaffold_1014	NC_021332	68.263	167	51	2	9593	9758	39723	39558	0.000211	55.4
Scaffold_1014	NC_021072	82.456	57	9	1	61067	61123	71422	71477	0.000211	55.4
Scaffold_1014	NC_019726	83.636	55	8	1	9584	9637	52520	52466	0.000211	55.4
Scaffold_1014	NC_015289	82.258	62	9	2	61062	61123	161764	161705	0.000211	55.4
Scaffold_1014	NC_007603	78.462	65	14	0	61067	61131	4955	4891	0.000211	55.4
Scaffold_1014	NC_007603	78.689	61	13	0	60249	60309	4955	4895	0.003	51.8
Scaffold_1014	NC_006820	80.645	62	11	1	61067	61127	164536	164475	0.000211	55.4
Scaffold_1014	NC_006820	78.947	57	12	0	60249	60305	164536	164480	0.009	50
Scaffold_1014	NC_019406	80.952	63	9	2	61063	61123	69327	69266	0.000736	53.6
Scaffold_1014	NC_016571	82.143	56	9	1	61067	61122	16135	16189	0.000736	53.6
Scaffold_1014	NC_015285	80.702	57	11	0	61067	61123	159044	158988	0.000736	53.6
Scaffold_1014	NC_015252	66.071	224	66	4	9582	9800	19697	19479	0.000736	53.6
Scaffold_1014	JQ691610	79.032	62	13	0	60243	60304	2822	2883	0.000736	53.6
Scaffold_1014	JQ691610	80.357	56	11	0	61067	61122	2828	2883	0.003	51.8
Scaffold_1014	HQ317385	80.702	57	11	0	61067	61123	153787	153731	0.000736	53.6
Scaffold_1014	HM246724	75	92	19	3	60249	60336	13464	13555	0.000736	53.6
Scaffold_1014	HM246724	80.702	57	11	0	61067	61123	13464	13520	0.000736	53.6
Scaffold_1014	FN667789	75	92	19	3	60249	60336	112429	112338	0.000736	53.6
Scaffold_1014	FN667789	80.702	57	11	0	61067	61123	112429	112373	0.000736	53.6
Scaffold_1014	FN667788	80.702	57	11	0	61067	61123	112008	111952	0.000736	53.6
Scaffold_1014	FN667788	78.947	57	12	0	60249	60305	112008	111952	0.009	50
Scaffold_1014	AP011956	76.812	69	16	0	18662	18730	30126	30058	0.000736	53.6
Scaffold_1014	233894	81.481	54	10	0	60263	60316	61971	62024	0.000736	53.6
Scaffold_1014	NC_020877	87.234	47	4	2	36765	36811	111916	111960	0.003	51.8
Scaffold_1014	NC_019543	80.357	56	11	0	60249	60304	60949	61004	0.003	51.8
Scaffold_1014	NC_019543	78.571	56	12	0	61067	61122	60949	61004	0.031	48.2
Scaffold_1014	NC_019511	87.234	47	4	2	36765	36811	7336	7292	0.003	51.8
Scaffold_1014	NC_019445	80.357	56	11	0	61067	61122	14434	14489	0.003	51.8
Scaffold_1014	NC_007804	80.357	56	11	0	61067	61122	2867	2922	0.003	51.8
Scaffold_1014	JX306041	80.357	56	11	0	60249	60304	64264	64319	0.003	51.8
Scaffold_1014	JX306041	78.571	56	12	0	61067	61122	64264	64319	0.031	48.2
Scaffold_1014	NC_023584	78.947	57	12	0	61067	61123	154576	154520	0.009	50
Scaffold_1014	NC_023584	78.947	57	12	0	60249	60305	154576	154520	0.009	50
Scaffold_1014	NC_022052	80.357	56	9	1	60249	60304	63098	63045	0.009	50
Scaffold_1014	NC_022052	79.661	59	11	1	60249	60307	64074	64017	0.009	50
Scaffold_1014	NC_021536	80.702	57	10	1	61067	61123	147114	147059	0.009	50
Scaffold_1014	NC_021530	78.947	57	12	0	61067	61123	155111	155055	0.009	50
Scaffold_1014	NC_021530	78.947	57	12	0	60249	60305	155111	155055	0.009	50
Scaffold_1014	NC_015282	80.702	57	10	1	61067	61123	160677	160622	0.009	50
Scaffold_1014	NC_011421	76.812	69	15	1	61055	61123	32670	32603	0.009	50
Scaffold_1014	NC_010147	66.176	204	67	2	9594	9796	41494	41292	0.009	50
Scaffold_1014	NC_007060	70.476	105	31	0	9692	9796	24476	24372	0.009	50
Scaffold_1014	NC_007059	75.714	70	17	0	9206	9275	24555	24486	0.009	50
Scaffold_1014	HQ317290	80.702	57	10	1	61067	61123	161300	161245	0.009	50
Scaffold_1014	NC_020855	81.034	58	9	2	61067	61123	38897	38953	0.031	48.2
Scaffold_1014	NC_019540	76.056	71	16	1	61067	61137	44256	44187	0.031	48.2
Scaffold_10144	NC_004586	87.5	40	4	1	357	396	2759	2797	0.000896	46.4
Scaffold_10144	KF767351	85.714	35	5	0	45	79	277	311	0.038	41
Scaffold_1015	NC_009819	93.548	31	1	1	237	266	1298	1328	0.000892	44.6
Scaffold_10151	NC_023574	90.625	32	3	0	605	636	33891	33922	0.003	44.6
Scaffold_10152	6.66667e+06	79.63	54	8	2	48	99	15376	15324	0.005	42.8
Scaffold_1016	NC_016562	90	30	3	0	649	678	79493	79464	0.038	41
Scaffold_1016	NC_015464	90	30	3	0	649	678	124830	124801	0.038	41
Scaffold_1016	NC_009815	96.296	27	0	1	745	771	14785	14810	0.038	41
Scaffold_1016	KF148616	90	30	3	0	649	678	79727	79698	0.038	41
Scaffold_1016	FR823450	90	30	3	0	649	678	48607	48636	0.038	41
Scaffold_10162	NZ_ACSJ01000017	77.358	53	9	1	248	300	14716	14667	0.027	41
Scaffold_10162	NC_023719	90	30	3	0	47	76	154146	154175	0.027	41
Scaffold_10162	NC_019443	92.593	27	2	0	567	593	117804	117830	0.027	41
Scaffold_10162	NC_004629	90	30	3	0	106	135	176834	176863	0.027	41
Scaffold_10162	NC_001825	96	25	1	0	259	283	18502	18478	0.027	41
Scaffold_10162	AP013509	80.435	46	6	1	285	330	20269	20311	0.027	41
Scaffold_10162	AP013432	77.778	54	6	2	240	293	7857	7904	0.027	41
Scaffold_10164	NC_020863	86.667	45	3	3	652	694	116127	116084	0.004	44.6
Scaffold_10164	NC_018264	92.593	27	2	0	785	811	2886	2860	0.05	41
Scaffold_10166	NC_014663	86.486	37	5	0	1175	1211	131668	131704	0.008	44.6
Scaffold_10168	JN797798	96.296	27	0	1	285	311	127771	127746	0.015	41
Scaffold_1017	NC_023719	86.111	36	5	0	907	942	240103	240068	0.02	42.8
Scaffold_10173	NC_009815	78.431	51	11	0	525	575	36834	36784	0.011	42.8
Scaffold_10173	NC_003216	78.431	51	11	0	525	575	39539	39489	0.011	42.8
Scaffold_10177	NC_023719	92.593	27	2	0	147	173	465293	465319	0.009	41
Scaffold_10177	KJ489402	90	30	3	0	14	43	62047	62076	0.009	41
Scaffold_1018	AP013402	90.909	33	2	1	317	348	33182	33150	0.006	42.8
Scaffold_1018	KF021268	88.235	34	2	1	228	259	131236	131203	0.02	41
Scaffold_10180	NC_021792	91.429	35	3	0	1467	1501	2318	2284	0.000139	50
Scaffold_10180	NC_023719	93.103	29	2	0	1467	1495	153374	153402	0.006	44.6
Scaffold_10180	NC_023719	90.625	32	1	1	1470	1499	458502	458471	0.021	42.8
Scaffold_10180	NC_019521	93.103	29	2	0	1086	1114	55578	55550	0.006	44.6
Scaffold_10180	AP013358	92.857	28	2	0	1472	1499	4022	3995	0.021	42.8
Scaffold_10181	NC_003524	82	50	9	0	1031	1080	20173	20124	0.000123	50
Scaffold_10181	NC_005822	76.056	71	15	2	590	659	623	554	0.005	44.6
Scaffold_10181	KJ596420	68.376	117	37	0	969	1085	281	165	0.005	44.6
Scaffold_10181	AJ245616	76.056	71	15	2	590	659	26440	26371	0.005	44.6
Scaffold_10181	AP013551	86.364	44	2	3	766	807	31893	31934	0.018	42.8
Scaffold_10183	NC_023590	92.593	27	2	0	61	87	11388	11362	0.022	41
Scaffold_10185	NC_021863	85.714	35	5	0	305	339	15711	15745	0.026	41
Scaffold_10185	NC_013195	85.714	35	5	0	305	339	16992	17026	0.026	41
Scaffold_10185	NC_007061	85.714	35	5	0	305	339	41905	41939	0.026	41
Scaffold_10185	NC_007058	85.714	35	5	0	305	339	42345	42379	0.026	41
Scaffold_10186	NC_020855	90.909	33	3	0	259	291	183005	182973	0.000283	46.4
Scaffold_10186	AP013441	92.308	26	2	0	193	218	33649	33624	0.042	39.2
Scaffold_10186	6.66667e+06	78.431	51	10	1	254	303	30020	30070	0.042	39.2
Scaffold_10192	AP013391	86.486	37	5	0	58	94	3809	3845	0.001	44.6
Scaffold_10192	AP013390	86.486	37	5	0	58	94	22010	21974	0.001	44.6
Scaffold_10192	NC_022752	88.235	34	3	1	77	109	36009	36042	0.011	41
Scaffold_10199	EU418428	93.548	31	2	0	629	659	107411	107381	0.00029	48.2
Scaffold_10199	AY176327	93.548	31	2	0	629	659	100354	100324	0.00029	48.2
Scaffold_10199	NC_019448	82.353	51	7	2	609	659	106044	105996	0.004	44.6
Scaffold_10199	NC_022918	80.392	51	8	2	609	659	111181	111133	0.043	41
Scaffold_10199	NC_019726	80.392	51	8	2	609	659	123281	123329	0.043	41
Scaffold_10199	NC_018276	80.392	51	8	2	492	542	29107	29155	0.043	41
Scaffold_10199	NC_016163	100	22	0	0	377	398	89084	89063	0.043	41
Scaffold_10199	NC_007581	78.431	51	9	1	361	409	100561	100611	0.043	41
Scaffold_102	NC_019401	94.872	39	2	0	1857	1895	289557	289519	6.33e-08	62.6
Scaffold_102	NC_006882	88.889	36	4	0	2641	2676	17214	17179	0.001	48.2
Scaffold_10205	NC_023569	90	30	3	0	701	730	52463	52434	0.031	41
Scaffold_10206	NC_015279	95.833	24	1	0	142	165	132954	132931	0.032	39.2
Scaffold_10207	NC_023582	75.214	117	21	4	1166	1275	52100	52215	1.2e-10	69.8
Scaffold_10207	NC_010945	74.074	108	24	2	1171	1276	5353	5248	5.12e-09	64.4
Scaffold_10207	KF021268	73.333	105	28	0	1171	1275	132531	132635	5.12e-09	64.4
Scaffold_10207	NC_021799	80.328	61	12	0	1166	1226	21348	21288	7.6e-07	57.2
Scaffold_10207	NC_019544	71.698	106	30	0	1171	1276	15345	15240	7.6e-07	57.2
Scaffold_10207	NC_016563	70.079	127	34	2	1151	1275	155656	155780	9.26e-06	53.6
Scaffold_10207	KC438283	70.27	111	33	0	1166	1276	18877	18767	3.23e-05	51.8
Scaffold_10207	JX306041	71.963	107	27	2	1171	1276	156559	156663	3.23e-05	51.8
Scaffold_10207	NC_019543	71.296	108	27	2	1171	1276	150702	150807	0.000113	50
Scaffold_10207	NC_021861	70.435	115	32	2	1162	1275	10442	10329	0.000394	48.2
Scaffold_10207	NC_019782	70.642	109	30	2	1169	1276	925	818	0.001	46.4
Scaffold_10207	NC_007501	69.444	108	33	0	1159	1266	35188	35081	0.001	46.4
Scaffold_10207	NC_023551	70.874	103	23	3	1175	1275	12371	12274	0.005	44.6
Scaffold_10207	NC_009814	84.615	39	6	0	1228	1266	18656	18618	0.005	44.6
Scaffold_10207	NC_020877	68.868	106	33	0	1171	1276	67386	67281	0.017	42.8
Scaffold_10207	NC_015284	86.111	36	5	0	1241	1276	3072	3037	0.017	42.8
Scaffold_10207	NC_006936	88.571	35	3	1	1164	1197	5488	5454	0.017	42.8
Scaffold_10208	NC_021773	93.103	29	1	1	1	29	32060	32087	0.009	41
Scaffold_10208	NC_012784	93.103	29	1	1	1	29	23268	23295	0.009	41
Scaffold_10208	NC_008689	93.103	29	1	1	1	29	21951	21978	0.009	41
Scaffold_10210	AP013358	84.615	39	4	1	67	103	6258	6220	0.01	41
Scaffold_10211	NC_021802	83.784	37	6	0	119	155	16160	16196	0.028	41
Scaffold_10214	GU967410	87.5	32	4	0	321	352	660	691	0.026	41
Scaffold_10217	NC_011421	92.308	26	2	0	196	221	60277	60252	0.047	39.2
Scaffold_1022	NC_019401	70.044	227	65	1	11639	11862	150826	150600	1.8e-19	102
Scaffold_1022	NC_019401	66.86	172	44	4	10890	11059	151389	151229	0.003	48.2
Scaffold_1022	NC_019526	67.491	283	83	5	11587	11863	48840	48561	1.68e-13	82.4
Scaffold_1022	NC_019526	80.357	56	9	2	11464	11518	48963	48909	0.042	44.6
Scaffold_1022	KC295538	68.208	173	46	2	10889	11061	331421	331584	4.51e-08	64.4
Scaffold_1022	NC_023574	85	40	3	1	168	204	22339	22378	0.042	44.6
Scaffold_10224	NC_023560	86.486	37	4	1	87	122	38485	38449	0.013	41
Scaffold_10224	NC_023719	80.488	41	8	0	76	116	187715	187675	0.046	39.2
Scaffold_10230	NC_017968	85.294	34	5	0	17	50	25672	25705	0.049	39.2
Scaffold_10233	NC_019511	78.723	47	10	0	135	181	9987	9941	0.008	41
Scaffold_10233	AP013545	85.714	35	5	0	167	201	28090	28124	0.008	41
Scaffold_10233	KF005318	81.395	43	7	1	98	140	34957	34998	0.028	39.2
Scaffold_10234	NC_021795	87.5	32	4	0	148	179	27953	27922	0.017	41
Scaffold_10237	AP011616	90	30	3	0	8	37	55358	55387	0.014	41
Scaffold_1024	AP013441	75.949	79	14	4	381	456	33141	33065	0.002	44.6
Scaffold_1024	NC_018857	74.648	71	8	3	458	526	151470	151408	0.006	42.8
Scaffold_10241	NC_023719	86.486	37	3	1	206	240	393544	393580	0.007	42.8
Scaffold_10244	NC_018861	81.818	44	7	1	14	57	128692	128734	0.038	41
Scaffold_10244	KF148616	81.818	44	7	1	14	57	81576	81618	0.038	41
Scaffold_10244	FR823450	81.818	44	7	1	14	57	46758	46716	0.038	41
Scaffold_10244	AP013382	80.435	46	7	1	151	196	14375	14332	0.038	41
Scaffold_10245	KC182545	83.333	42	7	0	189	230	3638	3597	0.001	44.6
Scaffold_10245	NC_021860	92.857	28	2	0	204	231	3345	3318	0.005	42.8
Scaffold_10245	NC_021853	92.857	28	2	0	204	231	3353	3326	0.005	42.8
Scaffold_10245	NC_021852	88.571	35	3	1	196	230	3347	3314	0.005	42.8
Scaffold_10245	NC_008370	88.571	35	3	1	196	230	3527	3494	0.005	42.8
Scaffold_10245	NC_008363	88.571	35	3	1	196	230	3363	3330	0.005	42.8
Scaffold_10245	KC522412	92.857	28	2	0	204	231	3344	3317	0.005	42.8
Scaffold_10245	KC182550	92.857	28	2	0	204	231	3333	3306	0.005	42.8
Scaffold_10245	KC182544	88.571	35	3	1	196	230	3372	3339	0.005	42.8
Scaffold_10245	KC182543	92.857	28	2	0	204	231	3353	3326	0.005	42.8
Scaffold_10245	GQ979703	88.571	35	3	1	196	230	3383	3350	0.005	42.8
Scaffold_10245	665883	88.571	35	3	1	196	230	3594	3561	0.005	42.8
Scaffold_10245	NC_021855	92.593	27	2	0	204	230	3342	3316	0.017	41
Scaffold_10245	NC_021854	92.593	27	2	0	204	230	3333	3307	0.017	41
Scaffold_10245	NC_016161	93.548	31	0	2	206	235	27292	27321	0.017	41
Scaffold_10245	NC_011046	92.593	27	2	0	205	231	3360	3334	0.017	41
Scaffold_10245	NC_001909	92.593	27	2	0	205	231	3355	3329	0.017	41
Scaffold_10245	KC182548	92.593	27	2	0	204	230	3352	3326	0.017	41
Scaffold_10245	JQ740789	92.593	27	2	0	204	230	3733	3707	0.017	41
Scaffold_10245	JQ740788	92.593	27	2	0	205	231	3580	3554	0.017	41
Scaffold_10245	JQ740787	92.593	27	2	0	205	231	3591	3565	0.017	41
Scaffold_10245	FJ848883	92.593	27	2	0	204	230	3596	3570	0.017	41
Scaffold_10245	FJ848881	92.593	27	2	0	204	230	3602	3576	0.017	41
Scaffold_10245	665886	92.593	27	2	0	204	230	3606	3580	0.017	41
Scaffold_10256	NC_023609	92.308	26	2	0	103	128	44403	44378	0.039	39.2
Scaffold_10256	NC_019408	95.833	24	1	0	98	121	111175	111152	0.039	39.2
Scaffold_10257	NC_019526	84.615	39	6	0	908	946	196865	196827	0.004	44.6
Scaffold_10261	NC_009813	90.698	43	4	0	121	163	27495	27537	1.23e-08	60.8
Scaffold_10261	AP013554	92.308	26	2	0	123	148	6364	6389	0.04	39.2
Scaffold_10262	NC_002747	66.667	408	120	9	205	606	30015	29618	6.89e-19	96.9
Scaffold_10262	NC_002747	64.679	218	77	0	808	1025	29430	29213	0.001	46.4
Scaffold_10262	DQ394806	65.803	386	119	7	205	585	32985	32608	1.52e-14	82.4
Scaffold_10262	DQ838728	73.134	134	32	2	205	336	27558	27427	2.25e-12	75.2
Scaffold_10262	DQ838728	66.871	163	52	2	424	585	27342	27181	0.004	44.6
Scaffold_10262	NC_002703	72.388	134	33	2	205	336	32154	32023	9.58e-11	69.8
Scaffold_10265	AP013382	96.154	26	1	0	61	86	40332	40307	0.003	42.8
Scaffold_10266	KC954775	92.857	28	2	0	912	939	101388	101415	0.016	42.8
Scaffold_10268	NZ_ACSJ01000013	80.952	42	8	0	431	472	5488	5447	0.019	41
Scaffold_10268	NC_007581	80.952	42	8	0	431	472	102099	102140	0.019	41
Scaffold_10269	NC_019401	81.395	43	8	0	746	788	276056	276098	0.024	42.8
Scaffold_10269	AP013430	84.211	38	6	0	395	432	17518	17555	0.024	42.8
Scaffold_10270	NC_023719	88.889	36	3	1	992	1026	199768	199803	0.01	44.6
Scaffold_10270	NC_023587	79.63	54	7	2	2023	2073	58251	58199	0.035	42.8
Scaffold_10270	KC295538	87.879	33	4	0	1038	1070	280407	280439	0.035	42.8
Scaffold_10272	NC_007710	78.723	47	10	0	104	150	38843	38889	0.015	41
Scaffold_10278	NC_023599	84.615	39	5	1	298	336	1666	1703	0.019	41
Scaffold_10278	NC_018085	84.615	39	5	1	298	336	107	144	0.019	41
Scaffold_1028	NC_017968	74.436	133	23	5	4570	4696	14860	14987	1.34e-11	75.2
Scaffold_1028	NC_008583	74.436	133	23	5	4570	4696	38657	38530	1.34e-11	75.2
Scaffold_1028	NC_007048	74.436	133	23	5	4570	4696	22119	21992	1.34e-11	75.2
Scaffold_1028	NC_004615	74.436	133	23	5	4570	4696	38544	38417	1.34e-11	75.2
Scaffold_1028	DQ530360	74.436	133	23	5	4570	4696	38651	38524	1.34e-11	75.2
Scaffold_1028	NC_007050	74.453	137	23	6	4570	4700	22285	22155	4.67e-11	73.4
Scaffold_1028	NC_007050	68.75	144	45	0	4303	4446	22510	22367	3.59e-06	57.2
Scaffold_1028	JX274647	74.453	137	23	6	4570	4700	37974	37844	4.67e-11	73.4
Scaffold_1028	JX274647	68.75	144	45	0	4303	4446	38199	38056	3.59e-06	57.2
Scaffold_1028	JX274646	74.453	137	23	6	4570	4700	38938	38808	4.67e-11	73.4
Scaffold_1028	JX274646	68.75	144	45	0	4303	4446	39163	39020	3.59e-06	57.2
Scaffold_1028	DQ530362	74.453	137	23	6	4570	4700	38712	38582	4.67e-11	73.4
Scaffold_1028	NC_014460	73.684	133	24	5	4570	4696	19699	19572	5.68e-10	69.8
Scaffold_1028	NC_010808	73.723	137	24	6	4570	4700	38866	38736	5.68e-10	69.8
Scaffold_1028	NC_008798	73.684	133	24	5	4570	4696	38239	38112	5.68e-10	69.8
Scaffold_1028	NC_007049	73.684	133	24	5	4570	4696	22177	22050	5.68e-10	69.8
Scaffold_1028	NC_024391	80.556	72	14	0	4570	4641	36757	36686	1.98e-09	68
Scaffold_1028	NC_011614	74.576	118	19	5	4576	4687	37225	37113	6.92e-09	66.2
Scaffold_1028	NC_011614	69.444	144	44	0	4303	4446	37456	37313	8.44e-08	62.6
Scaffold_1028	NC_018281	69.677	155	44	3	4303	4456	23020	22868	3.59e-06	57.2
Scaffold_1028	NC_018281	76.056	71	17	0	4570	4640	22795	22725	0.000153	51.8
Scaffold_1028	NC_007056	68.852	183	45	6	4591	4767	20799	20623	3.59e-06	57.2
Scaffold_1028	NC_007056	68.116	138	42	2	4310	4446	21038	20902	0.023	44.6
Scaffold_1028	NC_003288	68.75	144	45	0	4303	4446	38280	38137	3.59e-06	57.2
Scaffold_1028	NC_007047	69.63	135	39	2	4312	4445	20131	19998	0.000153	51.8
Scaffold_1028	NC_019914	82.979	47	8	0	4591	4637	35603	35557	0.000532	50
Scaffold_1028	NC_008722	80.851	47	9	0	4591	4637	22119	22073	0.023	44.6
Scaffold_10282	NC_013644	70.455	132	39	0	1	132	2081	1950	2.49e-09	62.6
Scaffold_10285	6.66667e+06	81.132	53	10	0	1788	1840	110827	110775	9.43e-05	51.8
Scaffold_10285	NC_019516	81.818	44	8	0	1792	1835	107402	107359	0.014	44.6
Scaffold_10287	AP013480	92.593	27	2	0	225	251	16790	16764	0.02	41
Scaffold_10288	NC_021856	77.5	80	18	0	36	115	90214	90135	7.77e-10	64.4
Scaffold_10288	NC_024370	72.222	108	30	0	20	127	18351	18458	9.46e-09	60.8
Scaffold_10288	JF767210	70.94	117	34	0	37	153	3705	3589	3.3e-08	59
Scaffold_10288	NC_021788	80.357	56	11	0	38	93	108227	108172	4.9e-06	51.8
Scaffold_10288	NC_004586	73.077	78	21	0	37	114	16433	16356	0.000208	46.4
Scaffold_10288	KF772233	73.438	64	17	0	52	115	31453	31390	0.031	39.2
Scaffold_10289	NC_019517	96.154	26	1	0	264	289	52908	52933	0.007	42.8
Scaffold_10289	NC_011041	96.154	26	1	0	264	289	52374	52399	0.007	42.8
Scaffold_1029	HM072038	69.658	6852	1878	91	27164	33918	13232	19979	0	2755
Scaffold_1029	HM072038	81.48	2041	347	14	11	2032	26632	28660	0	1941
Scaffold_1029	HM072038	95.652	92	4	0	10624	10715	38507	38598	4.37e-33	149
Scaffold_1029	HM072038	94.565	92	5	0	12281	12372	38507	38598	1.86e-31	143
Scaffold_1029	HM072038	73.118	186	41	1	19531	19716	6249	6425	9.01e-23	114
Scaffold_1029	HM072038	71.3	223	56	2	14896	15114	1379	1597	3.14e-22	113
Scaffold_1029	HM072038	88.889	72	8	0	11329	11400	37883	37954	8.44e-17	95.1
Scaffold_1029	HM072038	80.435	92	18	0	15604	15695	2081	2172	4.37e-14	86
Scaffold_1029	HM072038	63.694	471	169	2	16508	16977	3007	3476	9.63e-10	71.6
Scaffold_1029	HM072038	75	104	26	0	32782	32885	18731	18834	9.63e-10	71.6
Scaffold_1029	HM072038	68.362	177	42	4	19302	19467	5931	6104	4.99e-07	62.6
Scaffold_1029	HM072038	75.676	74	18	0	19626	19699	5780	5853	0.000258	53.6
Scaffold_1029	HM072038	76.562	64	15	0	19505	19568	6097	6160	0.011	48.2
Scaffold_1029	NC_023599	66.809	1639	497	20	14059	15680	2100	3708	2.25e-125	455
Scaffold_1029	NC_023599	72.941	170	46	0	5365	5534	31501	31670	1.98e-18	100
Scaffold_1029	NC_023599	68.108	185	57	2	16736	16919	4738	4921	1.74e-06	60.8
Scaffold_1029	NC_018085	66.748	1639	498	20	14059	15680	541	2149	2.74e-124	452
Scaffold_1029	NC_018085	73.529	170	45	0	5365	5534	31888	32057	1.63e-19	104
Scaffold_1029	NC_018085	67.442	172	56	0	16778	16949	3221	3392	6.07e-06	59
Scaffold_1029	NC_019502	66.151	1681	522	22	14062	15725	19518	21168	8.4e-112	410
Scaffold_1029	NC_019502	73.529	170	45	0	5365	5534	8617	8786	1.63e-19	104
Scaffold_1029	NC_019502	67.15	207	68	0	16743	16949	22160	22366	1.17e-08	68
Scaffold_1029	NC_001884	71.538	650	183	2	36722	37370	9676	9028	6.46e-88	331
Scaffold_1029	NC_001884	71.31	481	125	4	33923	34396	21772	21298	3.14e-60	239
Scaffold_1029	NC_001884	94.203	69	3	1	12405	12472	3762	3830	1.63e-19	104
Scaffold_1029	NC_001884	67.219	302	84	4	2865	3160	86133	86425	8.44e-17	95.1
Scaffold_1029	NC_001884	87.5	56	6	1	10744	10798	99553	99498	4.09e-08	66.2
Scaffold_1029	DQ222855	69.593	467	129	7	14653	15114	1103	1561	2.12e-43	183
Scaffold_1029	NC_009552	64.846	842	274	8	14887	15717	1792	2622	4.66e-39	168
Scaffold_1029	NC_009552	76.596	94	20	2	14146	14238	1066	1158	1.43e-07	64.4
Scaffold_1029	NC_009552	72.165	97	27	0	14668	14764	1576	1672	0.000258	53.6
Scaffold_1029	NC_009552	67.32	153	50	0	7159	7311	31310	31462	0.001	51.8
Scaffold_1029	NC_009552	100	25	0	0	10605	10629	40669	40693	0.038	46.4
Scaffold_1029	NC_023612	67.901	486	150	4	6899	7381	32980	33462	6.92e-37	161
Scaffold_1029	NC_023612	70.811	185	50	3	6078	6260	32156	32338	1.86e-12	80.6
Scaffold_1029	NC_023612	79.63	54	11	0	34329	34382	19942	19995	0.011	48.2
Scaffold_1029	NC_023007	67.548	416	122	6	34511	34921	107493	107086	1.43e-26	127
Scaffold_1029	NC_004166	68.615	325	102	0	7059	7383	37716	38040	1.43e-26	127
Scaffold_1029	NC_021865	71.315	251	60	4	17434	17678	3446	3690	6.07e-25	122
Scaffold_1029	HE614282	73.529	170	45	0	5365	5534	33275	33444	1.63e-19	104
Scaffold_1029	HE614282	66.272	169	57	0	23335	23503	10487	10655	0.011	48.2
Scaffold_1029	NC_011398	79.439	107	22	0	3055	3161	37218	37324	8.44e-17	95.1
Scaffold_1029	NC_008722	84.615	78	12	0	3052	3129	31133	31210	1.25e-14	87.8
Scaffold_1029	NC_008722	75	96	24	0	7160	7255	36550	36645	4.09e-08	66.2
Scaffold_1029	KF296717	68.526	251	75	3	34526	34774	37954	38202	1.25e-14	87.8
Scaffold_1029	NC_024211	84.416	77	12	0	34682	34758	27315	27239	4.37e-14	86
Scaffold_1029	NC_024211	93.548	31	2	0	10602	10632	45907	45937	0.011	48.2
Scaffold_1029	JX274647	77.273	110	15	2	5267	5367	11486	11594	4.37e-14	86
Scaffold_1029	JX274646	77.273	110	15	2	5267	5367	11261	11369	4.37e-14	86
Scaffold_1029	NC_017968	76.364	110	16	2	5267	5367	42530	42422	5.32e-13	82.4
Scaffold_1029	NC_017968	79.57	93	17	2	5277	5367	42532	42440	7.9e-11	75.2
Scaffold_1029	NC_008617	76.364	110	16	2	5267	5367	12789	12897	5.32e-13	82.4
Scaffold_1029	NC_008617	79.57	93	17	2	5277	5367	12787	12879	7.9e-11	75.2
Scaffold_1029	KC348600	68.696	230	63	4	34683	34906	5769	5543	1.86e-12	80.6
Scaffold_1029	AF234173	68.912	193	60	0	7146	7338	72087	72279	6.49e-12	78.8
Scaffold_1029	NZ_ACSJ01000017	75.701	107	26	0	3056	3162	29681	29575	2.26e-11	77
Scaffold_1029	NC_022775	79.31	87	18	0	26217	26303	32081	32167	2.26e-11	77
Scaffold_1029	NC_021539	75.455	110	27	0	17508	17617	3469	3578	2.26e-11	77
Scaffold_1029	NC_007917	77.32	97	22	0	3063	3159	34480	34576	2.26e-11	77
Scaffold_1029	NC_007917	87.5	40	4	1	28528	28566	3897	3936	0.038	46.4
Scaffold_1029	NC_003291	68.644	236	66	5	17453	17684	3427	3658	2.26e-11	77
Scaffold_1029	NC_018281	75.424	118	27	2	7139	7255	37005	37121	7.9e-11	75.2
Scaffold_1029	NC_023607	80	80	16	0	19505	19584	5001	5080	2.76e-10	73.4
Scaffold_1029	AF503408	68.394	193	61	0	7146	7338	74787	74979	2.76e-10	73.4
Scaffold_1029	JX307704	78.022	91	19	1	19497	19586	2571	2661	9.63e-10	71.6
Scaffold_1029	NC_021861	66.791	268	78	5	2902	3165	2744	3004	3.36e-09	69.8
Scaffold_1029	NC_018270	72.727	121	33	0	19452	19572	20601	20721	3.36e-09	69.8
Scaffold_1029	NC_018270	75.789	95	23	0	19461	19555	20646	20740	1.17e-08	68
Scaffold_1029	JX564242	66.791	268	78	5	2902	3165	901	1161	3.36e-09	69.8
Scaffold_1029	NC_020883	79.221	77	16	0	32614	32690	44315	44391	1.17e-08	68
Scaffold_1029	NC_018857	79.221	77	16	0	34682	34758	4131	4207	1.17e-08	68
Scaffold_1029	NC_018857	88.571	35	4	0	22990	23024	49107	49073	0.038	46.4
Scaffold_1029	NC_019487	72.973	111	30	0	35104	35214	57749	57859	4.09e-08	66.2
Scaffold_1029	KJ545483	82.812	64	11	0	17559	17622	6325	6388	4.09e-08	66.2
Scaffold_1029	NC_003390	80.882	68	13	0	19499	19566	38172	38105	1.43e-07	64.4
Scaffold_1029	NC_003390	78.689	61	13	0	19503	19563	37979	37919	0.001	51.8
Scaffold_1029	HM368260	75.904	83	20	0	7175	7257	24327	24245	1.74e-06	60.8
Scaffold_1029	NC_009813	67.401	227	59	7	2895	3113	44412	44631	6.07e-06	59
Scaffold_1029	FN297812	66.825	211	68	2	22972	23181	18197	18406	6.07e-06	59
Scaffold_1029	6.66667e+06	84.615	52	8	0	19472	19523	4966	5017	6.07e-06	59
Scaffold_1029	6.66667e+06	76.923	78	16	2	19508	19584	4804	4880	0.000258	53.6
Scaffold_1029	6.66667e+06	78.571	56	12	0	19472	19527	4993	5048	0.011	48.2
Scaffold_1029	NC_019722	76.316	76	18	0	23106	23181	17434	17509	2.12e-05	57.2
Scaffold_1029	NC_014792	70.69	116	34	0	19478	19593	108146	108261	2.12e-05	57.2
Scaffold_1029	6.66667e+06	72.581	124	30	4	19472	19593	2427	2548	2.12e-05	57.2
Scaffold_1029	6.66667e+06	71.134	97	19	1	19498	19594	2444	2531	0.000258	53.6
Scaffold_1029	KF030445	86.667	45	6	0	17429	17473	18548	18504	7.4e-05	55.4
Scaffold_1029	NC_018846	76.812	69	16	0	19461	19529	42143	42211	0.000258	53.6
Scaffold_1029	NC_017974	75.676	74	18	0	19499	19572	11517	11590	0.000258	53.6
Scaffold_1029	NC_017974	72.289	83	14	2	19472	19545	7734	7816	0.038	46.4
Scaffold_1029	NC_016762	75.325	77	19	0	7148	7224	21350	21426	0.000258	53.6
Scaffold_1029	NC_009554	73.563	87	23	0	26217	26303	14427	14513	0.000258	53.6
Scaffold_1029	NC_007501	85.106	47	7	0	26226	26272	12500	12546	0.000258	53.6
Scaffold_1029	NC_007501	70.968	93	18	1	5280	5372	26259	26342	0.003	50
Scaffold_1029	NC_005893	85.106	47	7	0	26226	26272	12580	12626	0.000258	53.6
Scaffold_1029	JF957058	73.81	84	22	0	19498	19581	2141	2224	0.000258	53.6
Scaffold_1029	NC_022965	69.863	146	29	6	19451	19584	4422	4564	0.001	51.8
Scaffold_1029	GU323708	68.212	151	44	2	2981	3129	26755	26903	0.001	51.8
Scaffold_1029	6.66667e+06	70.833	96	19	1	19498	19593	2471	2557	0.001	51.8
Scaffold_1029	NC_020201	82.979	47	8	0	19499	19545	117702	117748	0.003	50
Scaffold_1029	NC_019716	84.444	45	7	0	17429	17473	4468	4512	0.003	50
Scaffold_1029	NC_014260	68.462	130	31	2	19452	19580	108479	108599	0.003	50
Scaffold_1029	NC_009514	84.444	45	7	0	17429	17473	4679	4723	0.003	50
Scaffold_1029	NC_003524	69.841	126	36	2	7128	7252	27352	27476	0.003	50
Scaffold_1029	JX486088	85.714	42	6	0	19514	19555	31516	31557	0.003	50
Scaffold_1029	JX403939	74.026	77	20	0	7148	7224	18992	18916	0.003	50
Scaffold_1029	NC_019544	100	26	0	0	10604	10629	49028	49053	0.011	48.2
Scaffold_1029	NC_019400	71.277	94	27	0	19470	19563	100424	100517	0.011	48.2
Scaffold_1029	NC_019400	75	76	15	2	19463	19536	100498	100571	0.038	46.4
Scaffold_1029	NC_016563	85.366	41	6	0	34865	34905	543	503	0.011	48.2
Scaffold_1029	KJ920400	66.272	169	57	0	23335	23503	35170	35002	0.011	48.2
Scaffold_1029	JX409895	77.966	59	13	0	14919	14977	40830	40772	0.011	48.2
Scaffold_1029	JX409894	77.966	59	13	0	14919	14977	28983	28925	0.011	48.2
Scaffold_1029	6.66667e+06	72.527	91	14	3	19504	19584	4476	4565	0.011	48.2
Scaffold_1029	NC_014457	75	68	17	0	23346	23413	13134	13201	0.038	46.4
Scaffold_1029	NC_013598	80	50	10	0	19478	19527	16950	16999	0.038	46.4
Scaffold_1029	NC_007055	83.721	43	7	0	30505	30547	15313	15355	0.038	46.4
Scaffold_1029	NC_004746	88.571	35	4	0	25641	25675	27052	27086	0.038	46.4
Scaffold_1029	AJ245616	88.571	35	4	0	25641	25675	13381	13415	0.038	46.4
Scaffold_10294	KC295538	80.597	67	12	1	3	68	207852	207918	6.02e-08	59
Scaffold_10294	HQ317385	83.673	49	8	0	6	54	19326	19278	2.56e-06	53.6
Scaffold_10294	JX128257	80	55	10	1	1	54	75614	75668	0.00038	46.4
Scaffold_10294	NC_020873	79.63	54	10	1	14	66	157693	157746	0.001	44.6
Scaffold_10294	NC_019929	76.562	64	14	1	4	67	169871	169809	0.001	44.6
Scaffold_10294	JN797798	79.592	49	10	0	14	62	149978	150026	0.001	44.6
Scaffold_10294	NC_016163	82.222	45	7	1	251	294	74628	74672	0.005	42.8
Scaffold_10294	JX163858	100	23	0	0	36	58	103605	103627	0.005	42.8
Scaffold_10294	NC_006820	77.778	54	11	1	4	56	119670	119617	0.016	41
Scaffold_10294	NC_005260	76.364	55	13	0	3	57	107792	107846	0.016	41
Scaffold_10295	JN600960	83.636	55	9	0	32	86	39392	39446	3.2e-07	59
Scaffold_10295	NC_019930	83.333	48	8	0	36	83	18993	19040	4.75e-05	51.8
Scaffold_10295	NC_019930	80	50	10	0	34	83	18979	19028	0.002	46.4
Scaffold_10295	AP013370	77.778	54	6	1	19	72	29916	29869	0.007	44.6
Scaffold_10295	NC_019724	85	40	4	1	42	81	8149	8186	0.025	42.8
Scaffold_10295	NC_019503	88.571	35	3	1	1338	1371	131524	131490	0.025	42.8
Scaffold_10295	NC_019399	88.571	35	3	1	1338	1371	131552	131518	0.025	42.8
Scaffold_10295	NC_016566	85	40	4	1	42	81	9090	9127	0.025	42.8
Scaffold_10295	NC_012223	87.879	33	4	0	49	81	8864	8896	0.025	42.8
Scaffold_10295	JX128259	88.571	35	3	1	1338	1371	131657	131623	0.025	42.8
Scaffold_10295	HM137666	88.571	35	3	1	1338	1371	133796	133762	0.025	42.8
Scaffold_10295	AP011113	88.571	35	3	1	1338	1371	132941	132907	0.025	42.8
Scaffold_10296	NC_019915	67.176	524	162	6	44	562	29857	30375	6.13e-36	152
Scaffold_10296	NC_023582	64.76	542	163	11	56	583	24111	24638	5.04e-18	93.3
Scaffold_10296	NC_007052	69.872	156	47	0	120	275	15995	16150	5.75e-11	69.8
Scaffold_10296	KF030445	90.909	33	2	1	133	164	29105	29073	0.008	42.8
Scaffold_10297	NC_022758	85	40	6	0	377	416	16638	16677	0.000731	46.4
Scaffold_10297	NC_019513	85	40	6	0	377	416	28897	28858	0.000731	46.4
Scaffold_10297	NC_011612	85	40	6	0	377	416	36575	36614	0.000731	46.4
Scaffold_10297	NC_007054	85	40	6	0	377	416	16628	16667	0.000731	46.4
Scaffold_10297	NC_007053	85	40	6	0	377	416	16696	16735	0.000731	46.4
Scaffold_10297	NC_002661	85	40	6	0	377	416	33373	33412	0.000731	46.4
Scaffold_10297	JX174275	85	40	6	0	377	416	16628	16667	0.000731	46.4
Scaffold_10297	NC_023557	84.211	38	6	0	321	358	120941	120904	0.009	42.8
Scaffold_10297	NC_021323	82.5	40	7	0	377	416	36210	36249	0.031	41
Scaffold_10297	NC_007052	82.5	40	7	0	377	416	16627	16666	0.031	41
Scaffold_103	NC_019515	72.18	266	67	3	14353	14613	78362	78625	1.25e-30	140
Scaffold_103	NC_019515	74.82	139	33	1	14957	15093	78966	79104	5.66e-16	91.5
Scaffold_103	NC_019515	77.143	70	16	0	14012	14081	77424	77493	4.07e-05	55.4
Scaffold_103	NC_019401	68.805	343	97	6	14329	14666	134212	133875	4.07e-24	118
Scaffold_103	NC_023581	71.569	204	58	0	14393	14596	38097	37894	7.36e-21	107
Scaffold_103	KJ473422	73.563	174	46	0	14393	14566	20172	19999	7.36e-21	107
Scaffold_103	NC_022763	72.483	149	37	3	14938	15084	18060	18206	4.35e-11	75.2
Scaffold_103	NC_020873	76.531	98	23	0	14993	15090	12403	12306	1.52e-10	73.4
Scaffold_103	NC_020081	67.73	282	79	8	14339	14613	137762	137486	1.52e-10	73.4
Scaffold_103	NC_024137	70.629	143	42	0	14948	15090	18074	18216	1.85e-09	69.8
Scaffold_103	NC_019909	71.533	137	33	2	14954	15087	149017	149150	6.46e-09	68
Scaffold_103	JN797798	68.108	185	59	0	14923	15107	10220	10036	6.46e-09	68
Scaffold_103	JN797798	64.548	299	100	3	14351	14646	10696	10401	0.000142	53.6
Scaffold_103	JN797798	76.923	65	15	0	14000	14064	12066	12002	0.002	50
Scaffold_103	NC_018087	74.51	102	20	2	14957	15055	144089	144187	7.86e-08	64.4
Scaffold_103	NC_022771	68.063	191	59	2	14423	14612	16907	17096	2.74e-07	62.6
Scaffold_103	NC_019521	85.185	54	8	0	14329	14382	18077	18024	2.74e-07	62.6
Scaffold_103	KC595511	80.882	68	10	1	14003	14067	43669	43736	2.74e-07	62.6
Scaffold_103	NC_024205	73.267	101	27	0	14999	15099	19771	19871	9.58e-07	60.8
Scaffold_103	6.66667e+06	68.944	161	40	3	14449	14604	10652	10497	9.58e-07	60.8
Scaffold_103	NC_024125	73.196	97	26	0	14550	14646	128949	129045	3.34e-06	59
Scaffold_103	HE956711	73.196	97	26	0	14550	14646	142576	142672	3.34e-06	59
Scaffold_103	NC_018856	74.419	86	22	0	14999	15084	147234	147319	1.17e-05	57.2
Scaffold_103	NC_014792	76.829	82	17	2	14521	14601	142849	142929	4.07e-05	55.4
Scaffold_103	NC_014595	76.829	82	17	2	14521	14601	144425	144505	4.07e-05	55.4
Scaffold_103	AY587007	74.699	83	21	0	14552	14634	47312	47394	4.07e-05	55.4
Scaffold_103	NC_021806	71.654	127	32	4	14900	15024	18199	18075	0.000142	53.6
Scaffold_103	NC_021806	81.633	49	9	0	14333	14381	18835	18787	0.006	48.2
Scaffold_103	NC_016770	82.692	52	9	0	14456	14507	3488	3539	0.000142	53.6
Scaffold_103	NC_024211	87.805	41	5	0	14687	14727	20817	20857	0.000496	51.8
Scaffold_103	NC_021856	69.912	113	34	0	14942	15054	19856	19968	0.000496	51.8
Scaffold_103	NC_021856	75.758	66	16	0	14423	14488	19400	19465	0.006	48.2
Scaffold_103	NC_019399	71.134	97	28	0	14550	14646	141504	141600	0.002	50
Scaffold_103	NC_011811	84.091	44	7	0	14344	14387	53873	53916	0.006	48.2
Scaffold_103	NC_022758	79.661	59	9	2	17232	17287	32182	32124	0.021	46.4
Scaffold_103	NC_020863	67.692	130	42	0	14045	14174	58196	58325	0.021	46.4
Scaffold_103	KM051843	74.419	86	18	3	14530	14613	146621	146538	0.021	46.4
Scaffold_10301	NC_020855	90	30	3	0	27	56	44379	44408	0.017	41
Scaffold_10302	NC_024144	79.208	101	21	0	201	301	46098	46198	3.25e-16	87.8
Scaffold_10302	NC_019421	79.208	101	21	0	201	301	43013	43113	3.25e-16	87.8
Scaffold_10302	NC_009231	79.208	101	21	0	201	301	48272	48372	3.25e-16	87.8
Scaffold_10302	NC_007917	79.208	101	21	0	201	301	42764	42864	3.25e-16	87.8
Scaffold_10302	DQ113772	66.78	295	88	5	312	604	8314	8600	5.87e-13	77
Scaffold_10302	NC_013195	86.275	51	7	0	805	855	13933	13983	4.51e-08	60.8
Scaffold_10302	NC_007064	86.275	51	7	0	805	855	39049	39099	4.51e-08	60.8
Scaffold_10302	NC_007063	86.275	51	7	0	805	855	39852	39902	4.51e-08	60.8
Scaffold_10302	JX274647	86.275	51	7	0	805	855	13480	13530	4.51e-08	60.8
Scaffold_10302	JX274646	86.275	51	7	0	805	855	13255	13305	4.51e-08	60.8
Scaffold_10302	NC_024391	86	50	7	0	812	861	11636	11685	1.58e-07	59
Scaffold_10302	NC_011612	86	50	7	0	812	861	12101	12150	1.58e-07	59
Scaffold_10302	NC_007056	87.234	47	6	0	812	858	42186	42232	1.58e-07	59
Scaffold_10302	KC581799	73.626	91	24	0	208	298	24974	24884	5.5e-07	57.2
Scaffold_10302	KC581799	86.842	38	5	0	563	600	24604	24567	0.001	46.4
Scaffold_10302	KC348603	73.626	91	24	0	208	298	39581	39491	5.5e-07	57.2
Scaffold_10302	KC348603	86.842	38	5	0	563	600	39211	39174	0.001	46.4
Scaffold_10302	NC_020490	83.333	48	8	0	806	853	11558	11605	2.34e-05	51.8
Scaffold_10302	NC_023582	80.769	52	10	0	812	863	71761	71710	8.16e-05	50
Scaffold_10302	AP013480	71.579	95	27	0	312	406	27362	27456	8.16e-05	50
Scaffold_10302	NC_019511	85.366	41	6	0	812	852	10164	10204	0.000285	48.2
Scaffold_10302	NC_007060	80.392	51	10	0	802	852	39354	39404	0.000285	48.2
Scaffold_10302	NC_007059	80.392	51	10	0	802	852	39945	39995	0.000285	48.2
Scaffold_10302	NC_001884	80	50	10	0	108	157	114477	114526	0.001	46.4
Scaffold_10302	NC_020877	84.211	38	6	0	812	849	109088	109051	0.012	42.8
Scaffold_10302	NC_015262	83.784	37	6	0	510	546	30873	30909	0.042	41
Scaffold_10304	NZ_ACSJ01000017	81.818	44	7	1	16	59	24417	24459	0.012	41
Scaffold_10304	NC_007581	81.818	44	7	1	16	59	157577	157619	0.012	41
Scaffold_10304	NC_015253	87.097	31	4	0	85	115	63277	63307	0.042	39.2
Scaffold_10306	NC_021347	88.571	35	4	0	248	282	96028	96062	0.000282	46.4
Scaffold_10311	NC_001884	81.818	44	5	1	2141	2184	69611	69651	0.034	42.8
Scaffold_10312	NC_016562	85.714	35	5	0	277	311	34767	34733	0.017	41
Scaffold_10312	KF148616	85.714	35	5	0	277	311	35001	34967	0.017	41
Scaffold_10312	FR823450	85.714	35	5	0	277	311	93708	93742	0.017	41
Scaffold_10314	NC_023595	85	40	2	2	380	418	40161	40197	0.032	41
Scaffold_10314	NC_015262	85.366	41	3	2	148	187	19565	19527	0.032	41
Scaffold_10314	GU903191	100	22	0	0	150	171	28662	28641	0.032	41
Scaffold_10318	JN797798	78.261	69	15	0	497	565	149481	149413	3.06e-07	57.2
Scaffold_10318	NC_020873	73.469	98	23	2	461	557	157100	157005	3.73e-06	53.6
Scaffold_10318	NC_023719	75	72	18	0	490	561	60143	60214	4.55e-05	50
Scaffold_10318	NC_004313	77.941	68	13	2	492	559	21038	21103	0.000159	48.2
Scaffold_10318	NC_024137	96.429	28	1	0	530	557	31747	31774	0.000554	46.4
Scaffold_10318	NC_012697	73.256	86	20	2	477	562	73780	73862	0.000554	46.4
Scaffold_10318	NC_011811	78.125	64	12	2	497	559	23229	23291	0.000554	46.4
Scaffold_10318	HQ728263	78.125	64	12	2	497	559	6203	6265	0.000554	46.4
Scaffold_10318	NC_021529	76.923	65	12	2	497	559	229488	229425	0.002	44.6
Scaffold_10318	NC_015251	75	72	16	2	489	559	113488	113558	0.007	42.8
Scaffold_10318	NC_014636	82.979	47	6	2	483	529	191024	190980	0.007	42.8
Scaffold_10318	NC_019406	78.182	55	7	2	498	552	59269	59318	0.024	41
Scaffold_10318	NC_012696	72.093	86	21	2	477	562	72608	72690	0.024	41
Scaffold_10318	NC_009235	85.714	35	5	0	528	562	30601	30635	0.024	41
Scaffold_1032	NC_019400	93.333	30	1	1	330	358	135910	135881	0.041	42.8
Scaffold_10322	NC_007060	71.817	589	163	3	10	597	37406	36820	1.71e-81	304
Scaffold_10322	NC_024391	71.48	561	158	2	10	569	8956	8397	1.6e-75	284
Scaffold_10322	NC_007047	75	84	21	0	482	565	33302	33219	4.04e-07	57.2
Scaffold_10322	NC_007047	86.667	45	6	0	698	742	33064	33020	1.41e-06	55.4
Scaffold_10322	NC_012784	73.81	84	22	0	482	565	12788	12705	4.92e-06	53.6
Scaffold_10322	NC_007055	70	120	34	2	134	252	37833	37715	0.000209	48.2
Scaffold_10322	NC_007055	70.874	103	28	2	463	564	37510	37409	0.003	44.6
Scaffold_10322	AP013500	77.966	59	11	2	551	607	23167	23225	0.031	41
Scaffold_10323	NC_022770	84.211	38	6	0	373	410	27121	27084	0.006	42.8
Scaffold_10323	KF669657	84.211	38	6	0	373	410	27067	27030	0.006	42.8
Scaffold_10330	NC_014457	89.655	29	3	0	149	177	26048	26020	0.035	39.2
Scaffold_10334	NC_024147	90.625	32	3	0	66	97	55827	55796	0.001	44.6
Scaffold_10334	NC_003387	90.625	32	3	0	66	97	51307	51276	0.001	44.6
Scaffold_10335	NC_021559	88.235	34	4	0	280	313	118866	118899	0.002	44.6
Scaffold_10337	AJ245616	93.75	32	1	1	1381	1411	4130	4099	0.002	46.4
Scaffold_10337	AP013380	87.179	39	2	2	1390	1426	18001	18038	0.022	42.8
Scaffold_1034	NC_019782	82.609	46	5	1	5590	5632	15488	15533	0.017	46.4
Scaffold_1034	NC_019726	79.63	54	9	1	12615	12666	111553	111606	0.017	46.4
Scaffold_10340	AP013382	87.5	32	4	0	91	122	28238	28207	0.008	41
Scaffold_10346	NC_017975	89.744	39	2	2	2794	2830	128361	128323	0.004	46.4
Scaffold_10346	NC_021799	80.392	51	8	1	979	1029	42599	42551	0.013	44.6
Scaffold_10347	AP013360	88.235	34	4	0	66	99	32041	32008	0.009	44.6
Scaffold_10350	NC_007045	84.314	51	6	2	320	369	3280	3329	0.000101	50
Scaffold_10350	NC_015464	90.909	33	3	0	345	377	43534	43502	0.001	46.4
Scaffold_10350	AP013541	93.333	30	1	1	492	520	8331	8360	0.015	42.8
Scaffold_10353	NC_024137	87.5	32	4	0	429	460	116782	116751	0.025	41
Scaffold_10356	AP013370	82.609	46	8	0	263	308	21316	21271	0.000501	48.2
Scaffold_10356	JN849462	90.323	31	3	0	87	117	74417	74447	0.021	42.8
Scaffold_10357	6.66667e+06	96.154	26	1	0	582	607	56963	56988	0.01	42.8
Scaffold_10358	NC_019507	78.261	46	3	1	469	514	122104	122066	0.041	41
Scaffold_10359	AP013513	78.182	55	7	2	260	314	22640	22591	0.014	41
Scaffold_10359	AP013512	80	55	6	3	260	314	30659	30708	0.014	41
Scaffold_1036	AB609718	85.366	41	6	0	1252	1292	114843	114803	0.003	48.2
Scaffold_1036	AP013425	96.429	28	1	0	5041	5068	11346	11373	0.011	46.4
Scaffold_1036	NC_003157	88.889	36	3	1	1575	1610	13912	13878	0.038	44.6
Scaffold_1036	JX181825	82.353	51	7	2	2669	2718	89756	89707	0.038	44.6
Scaffold_1036	AP013540	86.486	37	5	0	9499	9535	5434	5398	0.038	44.6
Scaffold_10360	AP013403	85.714	35	5	0	152	186	9305	9339	0.014	41
Scaffold_10361	NC_019456	87.5	32	4	0	152	183	25203	25234	0.028	41
Scaffold_10363	NC_021788	82.609	46	6	2	858	901	144685	144640	0.043	41
Scaffold_10365	NC_013645	85	40	4	2	194	232	3050	3012	0.04	39.2
Scaffold_10368	NC_009603	82.258	372	66	0	17	388	42441	42812	5.82e-103	374
Scaffold_10368	NC_005886	84.615	39	3	1	128	163	36291	36253	0.004	42.8
Scaffold_10368	NC_005886	84.211	38	3	1	128	162	36339	36302	0.016	41
Scaffold_10369	NC_001884	75.962	104	25	0	66	169	40840	40737	3.61e-12	75.2
Scaffold_1037	JQ347801	83.117	77	12	1	9831	9906	23559	23635	5.98e-12	77
Scaffold_1037	NC_015288	84.507	71	7	2	9724	9794	20487	20553	7.28e-11	73.4
Scaffold_1037	NC_020837	82.667	75	9	2	9722	9796	74881	74811	2.54e-10	71.6
Scaffold_1037	NC_016658	80.556	72	14	0	9832	9903	3550	3479	3.1e-09	68
Scaffold_1037	NC_006820	82.192	73	9	2	9723	9795	165226	165294	3.1e-09	68
Scaffold_1037	NC_006820	86.275	51	7	0	9462	9512	118995	119045	4.6e-07	60.8
Scaffold_1037	NC_006820	77.027	74	15	2	9448	9519	118850	118923	0.000831	50
Scaffold_1037	NC_023688	81.818	66	11	1	9452	9516	94966	94901	1.32e-07	62.6
Scaffold_1037	NC_019913	80.263	76	13	2	9833	9906	22846	22921	1.32e-07	62.6
Scaffold_1037	NC_019450	80.263	76	13	2	9833	9906	24646	24721	1.32e-07	62.6
Scaffold_1037	NC_005260	81.818	66	11	1	9452	9516	108375	108310	1.32e-07	62.6
Scaffold_1037	NC_014636	80	70	12	1	9464	9533	193840	193773	4.6e-07	60.8
Scaffold_1037	NC_014636	83.019	53	9	0	9840	9892	192993	192941	1.95e-05	55.4
Scaffold_1037	NC_015294	78.947	76	14	2	9833	9906	92504	92579	1.6e-06	59
Scaffold_1037	NC_016158	79.688	64	13	0	9849	9912	44460	44523	5.6e-06	57.2
Scaffold_1037	NC_023587	77.907	86	15	4	9832	9915	155267	155350	1.95e-05	55.4
Scaffold_1037	NC_023587	77.465	71	12	2	9724	9794	152587	152653	0.000238	51.8
Scaffold_1037	NC_023717	86.957	46	5	1	9468	9512	149761	149806	6.82e-05	53.6
Scaffold_1037	AP013450	88.095	42	5	0	9476	9517	2261	2220	6.82e-05	53.6
Scaffold_1037	AP013446	88.095	42	5	0	9476	9517	11584	11625	6.82e-05	53.6
Scaffold_1037	NC_023007	78.261	69	11	2	9447	9513	149846	149780	0.000238	51.8
Scaffold_1037	NC_021856	82.353	51	9	0	9462	9512	35525	35575	0.000238	51.8
Scaffold_1037	NC_019411	74.359	78	20	0	9829	9906	47197	47274	0.000238	51.8
Scaffold_1037	NC_011273	84	50	7	1	9471	9519	94286	94335	0.000238	51.8
Scaffold_1037	JX163858	74.359	78	20	0	9829	9906	159869	159792	0.000238	51.8
Scaffold_1037	JN849462	73.494	83	22	0	9828	9910	175898	175816	0.000238	51.8
Scaffold_1037	233894	80	60	11	1	9848	9906	64456	64397	0.000238	51.8
Scaffold_1037	NC_017974	74.026	77	20	0	9833	9909	147051	147127	0.000831	50
Scaffold_1037	NC_013085	76.056	71	14	1	9724	9794	32001	31934	0.000831	50
Scaffold_1037	NC_023568	73.418	79	21	0	9828	9906	112011	111933	0.003	48.2
Scaffold_1037	NC_020879	83.333	48	7	1	9860	9906	64990	64943	0.003	48.2
Scaffold_1037	NC_005135	83.333	48	7	1	9860	9906	68889	68842	0.003	48.2
Scaffold_1037	NC_023584	75.714	70	16	1	9722	9791	18856	18924	0.01	46.4
Scaffold_1037	NC_022096	74.026	77	19	1	9449	9524	122690	122766	0.01	46.4
Scaffold_1037	NC_021529	72.414	87	23	1	9825	9910	226116	226030	0.01	46.4
Scaffold_1037	NC_021072	75.714	70	16	1	9722	9791	37370	37302	0.01	46.4
Scaffold_1037	NC_020873	73.077	78	21	0	9447	9524	157661	157584	0.01	46.4
Scaffold_1037	NC_015289	75.714	70	16	1	9722	9791	19387	19455	0.01	46.4
Scaffold_1037	NC_015286	75.714	70	16	1	9722	9791	22320	22388	0.01	46.4
Scaffold_1037	NC_015285	75.714	70	16	1	9722	9791	18352	18420	0.01	46.4
Scaffold_1037	NC_004305	76.119	67	15	1	9830	9895	2591	2657	0.01	46.4
Scaffold_1037	HQ317385	75.949	79	16	3	9830	9906	13710	13787	0.01	46.4
Scaffold_1037	NC_023571	72.093	86	22	1	9717	9802	1	84	0.035	44.6
Scaffold_1037	NC_023560	72.093	86	22	1	9717	9802	1	84	0.035	44.6
Scaffold_1037	NC_023559	72.093	86	22	1	9717	9802	1	84	0.035	44.6
Scaffold_1037	NC_021788	84.091	44	6	1	9471	9513	89119	89162	0.035	44.6
Scaffold_1037	NC_019516	76	75	15	3	9832	9904	27616	27689	0.035	44.6
Scaffold_1037	NC_015282	75.362	69	16	1	9723	9791	18960	19027	0.035	44.6
Scaffold_10372	JX307704	85.714	35	5	0	195	229	28011	28045	0.013	41
Scaffold_10373	NC_024125	87.5	40	4	1	941	980	58512	58474	0.003	46.4
Scaffold_10373	NC_018855	85.714	42	5	1	940	981	42097	42137	0.003	46.4
Scaffold_10373	NC_014260	93.333	30	2	0	950	979	70939	70910	0.003	46.4
Scaffold_10373	NC_014260	85	40	5	1	942	981	71173	71135	0.036	42.8
Scaffold_10373	NC_014792	83.721	43	6	1	939	981	57665	57624	0.036	42.8
Scaffold_10373	NC_014595	83.721	43	6	1	939	981	58695	58654	0.036	42.8
Scaffold_10373	JX128259	85	40	5	1	941	980	71086	71048	0.036	42.8
Scaffold_10373	AP013478	87.879	33	4	0	497	529	17907	17875	0.036	42.8
Scaffold_10374	NC_008199	76.119	67	11	3	121	186	13248	13310	0.017	41
Scaffold_10377	NC_024384	90.625	32	2	1	314	344	2020	1989	0.028	41
Scaffold_10377	NC_009810	90.625	32	2	1	314	344	32626	32595	0.028	41
Scaffold_10377	6.66667e+06	90	30	3	0	506	535	144573	144602	0.028	41
Scaffold_10378	NC_022775	76.636	107	25	0	528	634	32075	32181	3.33e-14	80.6
Scaffold_10378	NC_009554	76.344	93	22	0	528	620	14421	14513	6.03e-11	69.8
Scaffold_10379	NC_019521	96.296	27	1	0	318	344	175895	175869	0.004	44.6
Scaffold_10379	NC_005822	78.723	47	10	0	307	353	955	1001	0.047	41
Scaffold_10379	NC_004302	78.723	47	10	0	307	353	955	1001	0.047	41
Scaffold_10379	NC_002703	78.723	47	10	0	307	353	955	1001	0.047	41
Scaffold_10379	AJ245616	78.723	47	10	0	307	353	26772	26818	0.047	41
Scaffold_1038	NC_016564	79.245	53	11	0	1780	1832	18643	18695	0.022	46.4
Scaffold_10384	NC_024387	67.66	705	212	8	243	942	1911	1218	5.94e-57	223
Scaffold_10384	NC_009812	67.96	696	203	10	254	942	1908	1226	5.94e-57	223
Scaffold_10384	NC_007051	71.579	190	44	5	579	766	1639	1458	1.08e-15	86
Scaffold_10384	NC_007051	75.309	81	16	3	339	417	1879	1801	0.001	46.4
Scaffold_10384	NC_009018	68.354	237	71	2	230	464	16032	15798	3.76e-15	84.2
Scaffold_10384	NC_009018	70.085	117	29	1	452	562	15768	15652	1.82e-06	55.4
Scaffold_10387	AP013454	92.857	28	2	0	325	352	22569	22596	0.032	42.8
Scaffold_10388	NC_014457	92.308	26	2	0	109	134	7563	7588	0.042	39.2
Scaffold_1039	AY583234	88.235	34	4	0	1152	1185	11184	11217	0.009	44.6
Scaffold_10396	NC_022770	87.5	32	4	0	72	103	35717	35748	0.045	41
Scaffold_10396	NC_012530	92.593	27	2	0	290	316	46501	46527	0.045	41
Scaffold_10396	KF669657	87.5	32	4	0	72	103	35714	35745	0.045	41
Scaffold_10397	NC_015251	87.879	33	3	1	5	36	124807	124775	0.049	39.2
Scaffold_104	NC_018272	90.625	32	3	0	2056	2087	5604	5635	0.016	44.6
Scaffold_104	NC_018271	90.625	32	3	0	2056	2087	5604	5635	0.016	44.6
Scaffold_1040	NC_017978	89.744	39	2	2	6928	6964	26163	26201	0.008	46.4
Scaffold_10400	NZ_ACSJ01000017	70.492	122	29	5	849	965	19756	19637	0.018	42.8
Scaffold_10403	NC_022769	79.032	62	8	4	66	123	106094	106154	0.033	41
Scaffold_10403	KJ489402	79.032	62	8	4	66	123	104680	104740	0.033	41
Scaffold_10409	NC_001884	76.647	167	39	0	387	553	73870	73704	1.15e-27	125
Scaffold_1041	NC_023719	88.571	70	8	0	17615	17684	181346	181277	4.84e-16	91.5
Scaffold_1041	NC_014663	75.385	65	16	0	17283	17347	166954	167018	0.018	46.4
Scaffold_1041	KJ489402	80	50	10	0	133	182	141821	141772	0.018	46.4
Scaffold_10410	NC_019408	100	23	0	0	157	179	205991	205969	0.004	42.8
Scaffold_10412	HM072038	76.758	512	119	0	1111	1622	35628	35117	4.07e-106	387
Scaffold_10412	HM072038	74.097	637	143	11	1	633	36862	36244	7.36e-103	376
Scaffold_10414	AP013543	83.333	42	6	1	336	377	18001	17961	0.037	41
Scaffold_10415	NC_015254	72.263	137	32	3	79	212	33906	33773	1.15e-10	68
Scaffold_10415	NC_015252	70.073	137	35	3	79	212	29828	29695	7.24e-07	55.4
Scaffold_10415	NC_003524	66.986	209	58	5	2	206	26230	26029	2.53e-06	53.6
Scaffold_10415	NC_024203	73.034	89	13	5	250	329	39125	39039	0.016	41
Scaffold_10417	NC_016563	80	50	8	1	61	110	14597	14550	0.004	42.8
Scaffold_10417	NC_023581	79.245	53	9	2	86	137	69372	69423	0.046	39.2
Scaffold_10417	NC_019490	100	21	0	0	276	296	44825	44845	0.046	39.2
Scaffold_10419	NC_016163	93.333	30	2	0	41	70	83611	83640	0.000191	46.4
Scaffold_10420	NC_021856	88.235	34	4	0	21	54	84293	84260	0.001	44.6
Scaffold_10421	NC_018855	89.189	37	2	2	429	465	36178	36144	0.007	42.8
Scaffold_10421	KF562341	89.189	37	2	2	429	465	69293	69327	0.007	42.8
Scaffold_10426	NC_020079	90	30	3	0	194	223	143279	143250	0.017	41
Scaffold_10426	FR775895	90	30	3	0	194	223	137345	137316	0.017	41
Scaffold_10426	AP011616	92.593	27	2	0	338	364	144225	144251	0.017	41
Scaffold_10428	NC_021071	92.308	26	2	0	71	96	35971	35996	0.045	39.2
Scaffold_10428	NC_019725	83.333	42	4	2	2	41	34739	34779	0.045	39.2
Scaffold_10429	NC_020877	81.481	54	7	2	159	210	58179	58231	0.000669	46.4
Scaffold_10429	NC_019511	81.481	54	7	2	159	210	63973	63921	0.000669	46.4
Scaffold_10429	NC_020850	90.625	32	2	1	387	418	6392	6422	0.028	41
Scaffold_1043	NC_019521	96	25	1	0	446	470	110878	110902	0.021	41
Scaffold_10434	NC_016163	85	40	5	1	227	266	116334	116372	0.004	42.8
Scaffold_10435	NC_021789	78.182	55	11	1	220	273	4027	3973	0.004	42.8
Scaffold_1044	NC_020849	100	24	0	0	867	890	55076	55099	0.046	44.6
Scaffold_1044	NC_015280	100	24	0	0	2224	2247	139605	139628	0.046	44.6
Scaffold_10442	NC_018861	100	21	0	0	128	148	48401	48421	0.045	39.2
Scaffold_10442	NC_016562	100	21	0	0	128	148	1109	1129	0.045	39.2
Scaffold_10442	NC_015464	100	21	0	0	128	148	44967	44987	0.045	39.2
Scaffold_10442	KF148616	100	21	0	0	128	148	1342	1362	0.045	39.2
Scaffold_10442	FR823450	100	21	0	0	128	148	127367	127347	0.045	39.2
Scaffold_10446	NC_006820	87.879	33	3	1	225	256	55352	55384	0.047	39.2
Scaffold_10448	NC_017984	80	45	6	1	246	287	35845	35801	0.04	39.2
Scaffold_10448	HM368260	80	45	6	1	246	287	29978	30022	0.04	39.2
Scaffold_10450	NC_021559	87.5	32	4	0	191	222	169548	169579	0.012	41
Scaffold_10452	AB609718	82.5	40	7	0	42	81	135902	135941	0.008	41
Scaffold_10459	NC_023719	85.714	42	4	2	7	47	78328	78288	0.018	42.8
Scaffold_1046	NC_017984	88.889	36	4	0	2631	2666	41829	41864	0.000772	48.2
Scaffold_1046	NC_014792	92.857	28	2	0	1250	1277	89155	89182	0.033	42.8
Scaffold_1046	NC_014595	92.857	28	2	0	1250	1277	91775	91802	0.033	42.8
Scaffold_10460	NC_020843	78	50	11	0	127	176	75940	75989	0.009	41
Scaffold_10464	NC_019421	85.366	41	5	1	602	642	43702	43663	0.003	44.6
Scaffold_1047	NC_021559	88.889	36	4	0	1582	1617	131695	131660	0.002	48.2
Scaffold_10470	NC_009813	88.571	35	4	0	34	68	27532	27498	0.002	46.4
Scaffold_10474	NC_019508	96.667	30	1	0	89	118	28698	28669	6.14e-05	50
Scaffold_10474	NC_019506	96.667	30	1	0	89	118	28943	28914	6.14e-05	50
Scaffold_10474	JF767210	96.667	30	1	0	89	118	29270	29241	6.14e-05	50
Scaffold_10475	KC182550	82.051	39	7	0	133	171	24109	24071	0.029	39.2
Scaffold_10479	NC_015464	71.287	101	17	5	371	461	41170	41268	0.024	41
Scaffold_10479	GU071092	90	30	3	0	405	434	41503	41474	0.024	41
Scaffold_10484	NC_015251	92.593	27	2	0	279	305	13933	13959	0.019	41
Scaffold_10485	NC_012697	81.818	44	8	0	316	359	73770	73813	0.001	44.6
Scaffold_10489	6.66667e+06	87.5	32	4	0	123	154	8097	8066	0.045	41
Scaffold_10490	NC_007064	82.927	41	7	0	1432	1472	32098	32058	0.026	42.8
Scaffold_10494	NC_020877	92.857	28	2	0	670	697	112939	112912	0.01	42.8
Scaffold_10494	NC_019511	92.857	28	2	0	670	697	2520	2547	0.01	42.8
Scaffold_10497	NC_023719	90.625	32	0	1	406	437	136193	136165	0.009	42.8
Scaffold_105	KC348603	70.37	162	42	3	6859	7017	9081	9239	3.38e-09	68
Scaffold_105	KC348603	70.543	129	36	2	2112	2239	7244	7371	2.13e-05	55.4
Scaffold_105	NC_022763	93.103	29	2	0	10393	10421	143029	143001	0.039	44.6
Scaffold_1050	NC_022094	90.625	32	3	0	913	944	868	899	0.016	44.6
Scaffold_10507	6.66667e+06	83.333	42	6	1	171	212	50708	50748	0.04	41
Scaffold_10509	NC_017975	92.857	28	1	1	8	34	96943	96970	0.048	39.2
Scaffold_10510	NC_017975	84.211	38	3	1	750	784	114300	114337	0.048	41
Scaffold_10513	NC_018857	92.857	28	2	0	54	81	40952	40925	0.015	42.8
Scaffold_10514	NC_019399	78.723	47	10	0	495	541	101981	101935	0.05	41
Scaffold_10514	HE956711	78.723	47	10	0	495	541	101918	101872	0.05	41
Scaffold_10514	AP013445	93.103	29	1	1	1043	1070	3094	3066	0.05	41
Scaffold_10514	AP011113	78.723	47	10	0	495	541	101592	101546	0.05	41
Scaffold_10516	NC_019401	92.593	27	2	0	72	98	241550	241524	0.023	41
Scaffold_1052	NC_008723	68.462	891	222	18	5304	6163	25281	26143	3.93e-83	313
Scaffold_1052	NC_008723	67.391	184	59	1	4800	4983	24772	24954	1.38e-06	59
Scaffold_1052	NC_018284	68.09	890	227	19	5304	6163	23928	24790	1.29e-76	291
Scaffold_1052	NC_018284	68.047	169	54	0	4815	4983	23433	23601	1.13e-07	62.6
Scaffold_1052	NC_008722	67.901	891	229	19	5304	6164	24841	25704	1.91e-74	284
Scaffold_1052	NC_008722	68.047	169	54	0	4815	4983	24346	24514	1.13e-07	62.6
Scaffold_1052	NC_007054	68.908	714	181	17	5184	5866	20836	21539	1.37e-63	248
Scaffold_1052	NC_007054	78.182	55	12	0	4621	4675	20272	20326	0.009	46.4
Scaffold_1052	NC_023500	67.13	864	256	13	5321	6161	39713	40571	1.67e-62	244
Scaffold_1052	NC_021326	67.13	864	256	13	5321	6161	4968	4110	1.67e-62	244
Scaffold_1052	NC_008798	67.376	846	242	15	5352	6171	41104	41941	1.67e-62	244
Scaffold_1052	NC_020199	68.768	714	182	17	5184	5866	43273	43976	5.84e-62	242
Scaffold_1052	NC_020199	78.182	55	12	0	4621	4675	42709	42763	0.009	46.4
Scaffold_1052	NC_012784	68.768	714	182	17	5184	5866	40237	40940	5.84e-62	242
Scaffold_1052	NC_012784	78.182	55	12	0	4621	4675	39673	39727	0.009	46.4
Scaffold_1052	NC_008799	66.667	909	257	16	5301	6171	41058	41958	5.84e-62	242
Scaffold_1052	NC_008689	68.768	714	182	17	5184	5866	38911	39614	5.84e-62	242
Scaffold_1052	NC_008689	78.182	55	12	0	4621	4675	38347	38401	0.009	46.4
Scaffold_1052	JX174275	68.768	714	182	17	5184	5866	22594	23297	5.84e-62	242
Scaffold_1052	JX174275	78.182	55	12	0	4621	4675	22030	22084	0.009	46.4
Scaffold_1052	AP011956	68.768	714	182	17	5184	5866	38823	39526	5.84e-62	242
Scaffold_1052	AP011956	78.182	55	12	0	4621	4675	38259	38313	0.009	46.4
Scaffold_1052	NC_003288	67.086	875	258	16	5321	6171	40889	41757	8.67e-60	235
Scaffold_1052	NC_017968	68.028	710	194	15	5184	5866	12172	11469	6.67e-55	219
Scaffold_1052	NC_017968	78.182	55	12	0	4621	4675	12736	12682	0.009	46.4
Scaffold_1052	NC_007057	68.028	710	194	15	5184	5866	24207	24910	6.67e-55	219
Scaffold_1052	NC_007057	78.182	55	12	0	4621	4675	23643	23697	0.009	46.4
Scaffold_1052	NC_022758	67.927	714	188	17	5184	5866	22354	23057	8.12e-54	215
Scaffold_1052	NC_020490	69.04	604	158	13	5289	5873	42595	43188	2.84e-53	214
Scaffold_1052	NC_020490	71.569	102	27	2	4602	4702	41910	42010	0.009	46.4
Scaffold_1052	NC_019513	69.231	598	153	15	5289	5866	22813	22227	3.45e-52	210
Scaffold_1052	NC_007059	65.816	901	258	16	5301	6161	23770	24660	3.45e-52	210
Scaffold_1052	NC_011612	69.179	597	155	15	5289	5866	42658	43244	4.21e-51	206
Scaffold_1052	NC_008583	69.179	597	155	15	5289	5866	41463	42049	4.21e-51	206
Scaffold_1052	NC_007058	69.179	597	155	15	5289	5866	25050	25636	4.21e-51	206
Scaffold_1052	NC_007049	69.179	597	155	15	5289	5866	24983	25569	4.21e-51	206
Scaffold_1052	NC_005356	69.179	597	155	15	5289	5866	20106	20692	4.21e-51	206
Scaffold_1052	DQ530362	69.179	597	155	15	5289	5866	41518	42104	4.21e-51	206
Scaffold_1052	NC_007053	67.714	700	185	17	5184	5852	22662	23351	1.47e-50	205
Scaffold_1052	NC_007053	78.182	55	12	0	4621	4675	22098	22152	0.009	46.4
Scaffold_1052	NC_002661	69.297	583	148	15	5289	5851	39457	40028	1.47e-50	205
Scaffold_1052	KJ596420	69.007	584	150	15	5289	5852	39144	39716	2.18e-48	197
Scaffold_1052	KJ596420	78.182	55	12	0	4621	4675	38463	38517	0.009	46.4
Scaffold_1052	NC_020877	71.084	249	63	2	5921	6163	123762	123517	3.94e-26	123
Scaffold_1052	NC_020877	72.109	147	41	0	6017	6163	122891	122745	4.22e-13	80.6
Scaffold_1052	NC_019511	70.683	249	64	2	5921	6163	127542	127787	4.81e-25	120
Scaffold_1052	NC_019511	71.429	147	42	0	6017	6163	128413	128559	5.14e-12	77
Scaffold_1052	NC_007055	65.351	456	150	5	2633	3084	21794	22245	1.91e-17	95.1
Scaffold_1052	NC_022914	65.327	398	127	5	4773	5164	22497	22889	3.46e-14	84.2
Scaffold_1052	NC_021332	68.235	170	54	0	4872	5041	38836	39005	3.24e-08	64.4
Scaffold_1052	NC_019915	64.669	317	106	2	2867	3180	36144	36457	3.24e-08	64.4
Scaffold_1052	NC_010808	73.077	104	28	0	4938	5041	41389	41492	1.13e-07	62.6
Scaffold_1052	NC_010147	73.077	104	28	0	4938	5041	40674	40777	1.13e-07	62.6
Scaffold_1052	NC_007063	73.077	104	28	0	4938	5041	23794	23897	1.13e-07	62.6
Scaffold_1052	NC_007061	73.077	104	28	0	4938	5041	23842	23945	1.13e-07	62.6
Scaffold_1052	NC_007060	73.077	104	28	0	4938	5041	23754	23857	1.13e-07	62.6
Scaffold_1052	NC_007048	73.077	104	28	0	4938	5041	24641	24744	1.13e-07	62.6
Scaffold_1052	DQ908929	73.077	104	28	0	4938	5041	38988	39091	1.13e-07	62.6
Scaffold_1052	NC_014792	77.027	74	17	0	3170	3243	108185	108258	4.81e-06	57.2
Scaffold_1052	NC_014260	77.143	70	16	0	3175	3244	108846	108915	1.68e-05	55.4
Scaffold_1052	NC_014260	81.25	48	9	0	3197	3244	108508	108555	0.009	46.4
Scaffold_1052	KF751793	77.143	70	16	0	3275	3344	16277	16208	1.68e-05	55.4
Scaffold_1052	NC_021773	80.357	56	11	0	4986	5041	5679	5734	0.000205	51.8
Scaffold_1052	NC_019726	87.805	41	5	0	6481	6521	12129	12169	0.000205	51.8
Scaffold_1052	NC_019448	87.805	41	5	0	6481	6521	76216	76176	0.000205	51.8
Scaffold_1052	NC_014460	80.357	56	11	0	4986	5041	22169	22224	0.000205	51.8
Scaffold_1052	NC_013195	80.357	56	11	0	4986	5041	38795	38850	0.000205	51.8
Scaffold_1052	NC_008617	80.357	56	11	0	4986	5041	39027	39082	0.000205	51.8
Scaffold_1052	NC_007052	80.357	56	11	0	4986	5041	22704	22759	0.000205	51.8
Scaffold_1052	NC_007047	80.357	56	11	0	4986	5041	20830	20885	0.000205	51.8
Scaffold_1052	KF831354	80.357	56	11	0	4986	5041	4188	4133	0.000205	51.8
Scaffold_1052	EU418428	87.805	41	5	0	6481	6521	75703	75663	0.000205	51.8
Scaffold_1052	AY176327	87.805	41	5	0	6481	6521	68646	68606	0.000205	51.8
Scaffold_1052	NC_023582	66.667	165	55	0	4881	5045	34092	34256	0.000714	50
Scaffold_1052	NC_021795	78.947	57	12	0	3170	3226	26433	26489	0.000714	50
Scaffold_1052	KF751795	82	50	9	0	3275	3324	13331	13282	0.000714	50
Scaffold_1052	JX181824	81.633	49	9	0	3177	3225	14533	14581	0.002	48.2
Scaffold_1052	NC_021071	88.571	35	4	0	1307	1341	55155	55121	0.009	46.4
Scaffold_1052	NC_019914	73.333	75	20	0	3117	3191	36483	36557	0.009	46.4
Scaffold_1052	NC_015568	76.389	72	10	3	6583	6654	29056	29120	0.009	46.4
Scaffold_1052	NC_013645	70.93	86	16	1	3167	3243	16450	16535	0.009	46.4
Scaffold_1052	KF437907	76.389	72	15	2	3203	3273	8486	8556	0.009	46.4
Scaffold_1052	NC_020848	81.818	44	8	0	3186	3229	52274	52231	0.03	44.6
Scaffold_1052	NC_017974	74.627	67	17	0	3132	3198	9451	9517	0.03	44.6
Scaffold_1052	KM224879	75.342	73	16	2	3167	3238	24806	24735	0.03	44.6
Scaffold_1052	HQ630627	74.627	67	17	0	3177	3243	154892	154958	0.03	44.6
Scaffold_10520	KF021268	77.419	62	9	3	30	91	61844	61900	0.009	41
Scaffold_10522	NC_020848	92.308	26	2	0	148	173	66438	66413	0.04	39.2
Scaffold_10522	NC_015285	92.308	26	2	0	231	256	62527	62502	0.04	39.2
Scaffold_10525	NC_015262	80.952	42	8	0	580	621	7783	7742	0.03	41
Scaffold_10526	EU622808	83.333	102	16	1	3087	3187	17303	17202	1.56e-20	104
Scaffold_10526	AP013410	93.103	29	2	0	2802	2830	25233	25261	0.013	44.6
Scaffold_10529	NC_019526	86.842	38	5	0	19	56	286583	286620	0.000329	46.4
Scaffold_1053	NC_008723	66.629	893	242	21	2684	3544	25281	26149	6.27e-56	223
Scaffold_1053	NC_008723	69.903	103	31	0	2261	2363	24852	24954	0.01	46.4
Scaffold_1053	NC_018284	66.369	895	241	23	2684	3544	23928	24796	1.38e-51	208
Scaffold_1053	NC_018284	65.68	169	58	0	2195	2363	23433	23601	0.035	44.6
Scaffold_1053	NC_008722	66.14	886	245	20	2684	3536	24841	25704	1.68e-50	205
Scaffold_1053	NC_008722	65.68	169	58	0	2195	2363	24346	24514	0.035	44.6
Scaffold_1053	NC_007054	69.052	601	152	17	2669	3248	20953	21540	7.15e-49	199
Scaffold_1053	NC_020199	68.729	598	159	14	2669	3248	43390	43977	2.5e-48	197
Scaffold_1053	NC_012784	68.729	598	159	14	2669	3248	40354	40941	2.5e-48	197
Scaffold_1053	NC_008689	68.729	598	159	14	2669	3248	39028	39615	2.5e-48	197
Scaffold_1053	JX174275	68.729	598	159	14	2669	3248	22711	23298	2.5e-48	197
Scaffold_1053	AP011956	68.729	598	159	14	2669	3248	38940	39527	2.5e-48	197
Scaffold_1053	NC_011612	68.227	598	162	14	2669	3248	42658	43245	1.57e-44	185
Scaffold_1053	NC_019513	68.22	601	157	17	2669	3248	22813	22226	2.34e-42	178
Scaffold_1053	NC_008583	68.22	601	157	17	2669	3248	41463	42050	2.34e-42	178
Scaffold_1053	NC_007058	68.22	601	157	17	2669	3248	25050	25637	2.34e-42	178
Scaffold_1053	NC_007049	68.22	601	157	17	2669	3248	24983	25570	2.34e-42	178
Scaffold_1053	NC_005356	68.22	601	157	17	2669	3248	20106	20693	2.34e-42	178
Scaffold_1053	DQ530362	68.22	601	157	17	2669	3248	41518	42105	2.34e-42	178
Scaffold_1053	NC_022758	68.053	601	158	17	2669	3248	22471	23058	9.94e-41	172
Scaffold_1053	NC_017968	67.677	594	172	12	2669	3248	12055	11468	3.47e-40	170
Scaffold_1053	NC_007057	67.677	594	172	12	2669	3248	24324	24911	3.47e-40	170
Scaffold_1053	NC_007053	68.089	586	153	17	2669	3233	22779	23351	1.21e-39	168
Scaffold_1053	NC_020490	68.62	529	132	16	2669	3176	42595	43110	1.48e-38	165
Scaffold_1053	NC_020490	71.569	102	27	2	1982	2082	41910	42010	0.01	46.4
Scaffold_1053	KJ596420	67.692	585	157	15	2669	3233	39144	39716	1.48e-38	165
Scaffold_1053	NC_002661	67.753	583	158	15	2669	3232	39457	40028	5.15e-38	163
Scaffold_1053	NC_022914	73.934	211	55	0	6636	6846	25481	25271	8.72e-29	132
Scaffold_1053	NC_022914	65.075	398	128	5	2153	2544	22497	22889	1.68e-12	78.8
Scaffold_1053	NC_007059	69.649	313	85	4	2870	3176	23980	24288	3.71e-27	127
Scaffold_1053	NC_007059	72.109	147	38	1	3390	3533	24514	24660	1.68e-12	78.8
Scaffold_1053	NC_008799	69.329	313	86	4	2870	3176	41268	41576	4.52e-26	123
Scaffold_1053	NC_008798	69.329	313	86	4	2870	3176	41251	41559	4.52e-26	123
Scaffold_1053	NC_023500	68.333	360	107	5	2822	3176	39842	40199	5.5e-25	120
Scaffold_1053	NC_023500	73.469	147	36	1	3390	3533	40425	40571	3.25e-15	87.8
Scaffold_1053	NC_021326	68.333	360	107	5	2822	3176	4839	4482	5.5e-25	120
Scaffold_1053	NC_021326	73.944	142	34	1	3395	3533	4251	4110	3.25e-15	87.8
Scaffold_1053	NC_003288	68.333	360	107	5	2822	3176	41018	41375	5.5e-25	120
Scaffold_1053	NC_020877	73.759	141	28	2	3401	3535	123654	123517	3.25e-15	87.8
Scaffold_1053	NC_019511	73.05	141	29	2	3401	3535	127650	127787	1.38e-13	82.4
Scaffold_1053	NC_010808	73.077	104	28	0	2318	2421	41389	41492	1.3e-07	62.6
Scaffold_1053	NC_010147	73.077	104	28	0	2318	2421	40674	40777	1.3e-07	62.6
Scaffold_1053	NC_007063	73.077	104	28	0	2318	2421	23794	23897	1.3e-07	62.6
Scaffold_1053	NC_007061	73.077	104	28	0	2318	2421	23842	23945	1.3e-07	62.6
Scaffold_1053	NC_007060	73.077	104	28	0	2318	2421	23754	23857	1.3e-07	62.6
Scaffold_1053	NC_007048	73.077	104	28	0	2318	2421	24641	24744	1.3e-07	62.6
Scaffold_1053	DQ908929	73.077	104	28	0	2318	2421	38988	39091	1.3e-07	62.6
Scaffold_1053	NC_021773	80.357	56	11	0	2366	2421	5679	5734	0.000234	51.8
Scaffold_1053	NC_014460	80.357	56	11	0	2366	2421	22169	22224	0.000234	51.8
Scaffold_1053	NC_013195	80.357	56	11	0	2366	2421	38795	38850	0.000234	51.8
Scaffold_1053	NC_008617	80.357	56	11	0	2366	2421	39027	39082	0.000234	51.8
Scaffold_1053	NC_007052	80.357	56	11	0	2366	2421	22704	22759	0.000234	51.8
Scaffold_1053	NC_007047	80.357	56	11	0	2366	2421	20830	20885	0.000234	51.8
Scaffold_1053	KF831354	80.357	56	11	0	2366	2421	4188	4133	0.000234	51.8
Scaffold_1053	NC_017732	76.923	65	15	0	795	859	16066	16130	0.000817	50
Scaffold_10531	NC_016654	89.655	29	3	0	180	208	32312	32340	0.042	39.2
Scaffold_10531	NC_005357	95.833	24	1	0	234	257	34225	34248	0.042	39.2
Scaffold_10532	NC_020877	90	30	3	0	284	313	96060	96089	0.015	41
Scaffold_10532	NC_020199	87.5	32	4	0	140	171	4190	4159	0.015	41
Scaffold_10532	NC_019513	87.5	32	4	0	140	171	18472	18503	0.015	41
Scaffold_10532	NC_019511	90	30	3	0	284	313	28738	28709	0.015	41
Scaffold_10532	NC_008689	87.5	32	4	0	140	171	2936	2905	0.015	41
Scaffold_10532	NC_002661	87.5	32	4	0	140	171	2706	2675	0.015	41
Scaffold_10533	NC_019507	77.586	58	9	2	191	248	25830	25883	0.026	41
Scaffold_10533	FN667788	77.586	58	9	2	191	248	66241	66188	0.026	41
Scaffold_10537	6.66667e+06	92.593	27	2	0	94	120	48353	48379	0.048	41
Scaffold_10537	6.66667e+06	92.593	27	2	0	94	120	46583	46609	0.048	41
Scaffold_1054	NC_023719	66.957	230	74	2	12100	12328	254330	254558	2.21e-08	66.2
Scaffold_1054	NC_023719	83.673	49	8	0	7166	7214	188153	188201	0.000139	53.6
Scaffold_1054	NC_023719	71.579	95	27	0	6801	6895	187782	187876	0.002	50
Scaffold_1054	NC_015464	80.645	62	7	3	6739	6796	113937	113877	0.002	50
Scaffold_1054	NC_020853	88.571	35	4	0	7651	7685	27768	27802	0.021	46.4
Scaffold_1054	HQ641352	93.333	30	2	0	19175	19204	121301	121272	0.021	46.4
Scaffold_1054	HQ641348	93.333	30	2	0	19175	19204	117695	117666	0.021	46.4
Scaffold_10547	NC_015254	87.179	39	5	0	1982	2020	31938	31900	0.001	48.2
Scaffold_10547	NC_016163	82.222	45	3	1	3088	3127	26174	26130	0.003	46.4
Scaffold_10547	AP013398	81.395	43	8	0	2557	2599	32319	32361	0.041	42.8
Scaffold_1055	NC_019443	84.444	45	4	2	4971	5014	54971	54929	0.038	44.6
Scaffold_1055	AP013402	90.625	32	3	0	10039	10070	8404	8373	0.038	44.6
Scaffold_10550	NC_023719	67.857	140	41	3	405	542	216640	216503	0.032	41
Scaffold_10551	AP013426	80.769	52	9	1	158	209	1323	1273	0.000796	46.4
Scaffold_10551	AP013511	83.333	42	7	0	475	516	7670	7711	0.003	44.6
Scaffold_10551	NZ_ACSJ01000017	80.952	42	8	0	511	552	3315	3356	0.034	41
Scaffold_10552	NC_010105	100	23	0	0	69	91	82940	82918	0.006	42.8
Scaffold_10556	KF021268	87.879	33	3	1	42	74	122723	122692	0.047	39.2
Scaffold_10559	NC_003157	87.097	31	4	0	55	85	27680	27650	0.036	39.2
Scaffold_10559	KF751795	80.435	46	8	1	135	179	30891	30936	0.036	39.2
Scaffold_10559	KF751793	80.435	46	8	1	135	179	33412	33457	0.036	39.2
Scaffold_10563	KJ473422	80.488	41	8	0	88	128	98666	98706	0.034	39.2
Scaffold_10564	NC_020203	77.273	66	9	3	172	233	35348	35411	0.001	44.6
Scaffold_10564	KF475786	77.273	66	9	3	172	233	35104	35167	0.001	44.6
Scaffold_10564	NC_006548	76.562	64	13	2	172	233	37345	37408	0.018	41
Scaffold_10564	KM066034	96.296	27	0	1	42	67	44992	44966	0.018	41
Scaffold_10564	JX411620	96.296	27	0	1	42	67	44794	44768	0.018	41
Scaffold_10564	6.66667e+06	96.296	27	0	1	42	67	43159	43133	0.018	41
Scaffold_10566	KM051843	83.784	37	6	0	116	152	104458	104422	0.009	41
Scaffold_10568	NC_019526	77.778	72	10	4	633	698	190954	191025	0.001	46.4
Scaffold_10568	NC_021343	92.857	28	2	0	482	509	35052	35079	0.015	42.8
Scaffold_10570	NC_023719	68.718	195	57	2	113	305	77705	77513	9.85e-12	71.6
Scaffold_10573	NC_022770	81.25	48	7	1	971	1016	29297	29250	0.006	44.6
Scaffold_10573	KF669657	81.25	48	7	1	971	1016	29243	29196	0.006	44.6
Scaffold_10574	NC_004305	78.182	55	4	3	110	156	19810	19864	0.034	39.2
Scaffold_10575	NC_020489	84.615	39	6	0	1107	1145	30297	30259	0.008	44.6
Scaffold_10577	NC_023587	84.615	39	5	1	292	330	111336	111373	0.014	41
Scaffold_10579	NC_023719	76	75	9	4	198	263	295519	295593	0.002	44.6
Scaffold_10579	NC_021530	88.235	34	2	1	298	329	44707	44740	0.019	41
Scaffold_1058	NC_019401	73.154	149	32	3	8826	8970	73947	73803	1.47e-13	82.4
Scaffold_1058	NC_002747	91.429	35	3	0	1600	1634	17462	17496	0.000868	50
Scaffold_1058	NC_002703	88.571	35	4	0	1600	1634	18590	18624	0.011	46.4
Scaffold_1058	NC_001825	84.783	46	4	2	5117	5161	15322	15279	0.011	46.4
Scaffold_1058	NC_021806	88.571	35	1	1	640	674	13579	13548	0.037	44.6
Scaffold_1058	AP013459	86.486	37	5	0	1797	1833	15459	15495	0.037	44.6
Scaffold_10584	KF021268	82.609	46	5	2	6	48	104018	103973	0.034	41
Scaffold_10585	NC_023719	92.683	41	3	0	1	41	403966	403926	2.96e-08	60.8
Scaffold_10585	AP013482	96.296	27	1	0	1	27	13609	13635	0.002	44.6
Scaffold_10585	NC_011273	93.333	30	1	1	1	30	93756	93728	0.008	42.8
Scaffold_10585	NC_019529	92.593	27	2	0	1	27	45261	45235	0.028	41
Scaffold_1059	HQ317290	77.273	88	20	0	15773	15860	160087	160000	1.65e-09	69.8
Scaffold_1059	NC_015279	75.904	83	20	0	15777	15859	183078	182996	8.55e-07	60.8
Scaffold_1059	NC_015286	82.456	57	10	0	15767	15823	162723	162667	2.98e-06	59
Scaffold_1059	NC_019515	94.118	34	1	1	3619	3652	92476	92444	0.002	50
Scaffold_1059	HQ317385	78.947	57	12	0	15767	15823	152539	152483	0.002	50
Scaffold_1059	NC_015285	70.968	93	27	0	15768	15860	157802	157710	0.005	48.2
Scaffold_1059	NC_006884	81.25	48	9	0	15776	15823	166467	166420	0.019	46.4
Scaffold_10590	NC_020883	97.832	3782	80	2	1	3782	46829	50608	0	6444
Scaffold_10590	NC_020883	94.485	272	15	0	3766	4037	334	605	1.42e-116	423
Scaffold_10590	NC_020883	83.607	61	8	1	3697	3755	13124	13184	5.33e-08	62.6
Scaffold_10590	NC_020883	90.244	41	3	1	3716	3755	14258	14298	2.76e-05	53.6
Scaffold_10590	NC_020883	79.167	48	10	0	3708	3755	748	795	0.05	42.8
Scaffold_10590	NC_004166	81.661	578	101	2	1	578	21155	21727	7.85e-158	560
Scaffold_10590	NC_020081	70.199	151	39	2	3780	3927	63449	63302	4.37e-09	66.2
Scaffold_10590	DQ222855	80	55	11	0	1787	1841	20419	20473	0.000336	50
Scaffold_10590	NC_019502	78.182	55	12	0	1811	1865	42047	42101	0.004	46.4
Scaffold_10590	NC_007056	93.75	32	1	1	3047	3078	44200	44230	0.004	46.4
Scaffold_10590	NC_023612	77.778	54	12	0	665	718	19943	19996	0.014	44.6
Scaffold_10590	NC_020480	75.342	73	16	2	1107	1179	43129	43199	0.014	44.6
Scaffold_10590	NC_022770	88.571	35	3	1	1805	1838	27627	27661	0.05	42.8
Scaffold_10590	NC_006565	90.323	31	3	0	3047	3077	123139	123169	0.05	42.8
Scaffold_10590	KF669657	88.571	35	3	1	1805	1838	27573	27607	0.05	42.8
Scaffold_10591	NC_023582	100	23	0	0	80	102	43029	43007	0.003	42.8
Scaffold_1060	NC_009231	81.25	48	8	1	2164	2210	11147	11194	0.03	42.8
Scaffold_10603	NC_004629	92.857	28	2	0	40	67	265071	265098	0.004	42.8
Scaffold_10603	NC_007581	84.091	44	5	2	231	272	1145	1102	0.014	41
Scaffold_10606	KJ564037	92.857	28	2	0	368	395	20386	20413	0.009	42.8
Scaffold_10608	NC_024144	76.471	68	10	3	454	519	43659	43596	0.035	42.8
Scaffold_10608	NC_021799	80.435	46	9	0	2353	2398	53571	53616	0.035	42.8
Scaffold_10608	NC_016564	85.714	49	3	4	892	939	22018	22063	0.035	42.8
Scaffold_1061	NC_001884	80.143	700	136	1	915	1614	94855	94159	1.64e-179	634
Scaffold_1061	NC_001884	73.846	195	51	0	4770	4964	88379	88185	2.45e-25	122
Scaffold_1061	NC_001884	72.603	219	48	6	13789	13998	91618	91403	1.54e-21	109
Scaffold_10612	NC_006557	76.364	55	13	0	371	425	8012	8066	0.023	41
Scaffold_10617	NC_009760	74.809	131	33	0	1226	1356	184270	184140	9.27e-16	87.8
Scaffold_10617	NC_013085	90.625	32	3	0	436	467	3395	3364	0.01	44.6
Scaffold_1062	NC_001884	69.265	667	198	3	13921	14582	94826	94162	2.32e-70	271
Scaffold_10620	JF767210	88.235	34	3	1	760	792	13230	13197	0.039	41
Scaffold_10621	NC_011811	83.784	37	6	0	349	385	8986	8950	0.02	41
Scaffold_10622	KJ746502	86.842	38	1	2	170	207	49401	49434	0.019	41
Scaffold_10623	NC_021773	78.351	194	42	0	1699	1892	33066	33259	3.44e-38	161
Scaffold_10623	NC_012784	78.351	194	42	0	1699	1892	24274	24467	3.44e-38	161
Scaffold_10623	NC_008689	78.351	194	42	0	1699	1892	22957	23150	3.44e-38	161
Scaffold_10623	NC_012756	87.879	33	4	0	1861	1893	17426	17458	0.023	42.8
Scaffold_10623	6.66667e+06	85	40	4	1	1221	1260	92444	92407	0.023	42.8
Scaffold_10625	NC_024144	90.625	32	3	0	1045	1076	9740	9771	0.009	44.6
Scaffold_10625	KC595514	92.857	28	2	0	1928	1955	43847	43874	0.031	42.8
Scaffold_10626	NC_020875	88.235	34	4	0	1800	1833	104062	104095	0.009	44.6
Scaffold_10630	NC_019515	92.857	28	2	0	354	381	59200	59227	0.013	42.8
Scaffold_10630	AP013496	80.851	47	8	1	473	518	14280	14326	0.045	41
Scaffold_10631	NC_012756	100	23	0	0	131	153	14984	14962	0.005	42.8
Scaffold_10632	NC_007021	87.5	32	4	0	326	357	119907	119876	0.02	41
Scaffold_10633	NC_020079	88.235	34	3	1	323	355	35299	35266	0.027	41
Scaffold_10633	NC_009875	92.593	27	2	0	532	558	1699	1673	0.027	41
Scaffold_10633	NC_004629	86.486	37	4	1	544	580	47975	47940	0.027	41
Scaffold_10638	JX181824	96.296	27	1	0	797	823	54943	54917	0.003	44.6
Scaffold_10639	NC_005893	75.342	73	18	0	989	1061	15920	15848	4.56e-05	51.8
Scaffold_10639	NC_005893	73.333	75	20	0	727	801	16182	16108	0.002	46.4
Scaffold_1064	AP013393	78.723	47	10	0	223	269	33562	33516	0.018	41
Scaffold_10640	KC954775	73.864	88	23	0	299	386	136050	135963	1.07e-06	55.4
Scaffold_10642	6.66667e+06	77.966	59	10	2	181	236	11981	11923	0.009	42.8
Scaffold_10642	NC_019526	76.786	56	10	1	554	606	207350	207405	0.031	41
Scaffold_10644	FR775895	83.333	42	6	1	101	142	112132	112172	0.012	41
Scaffold_10645	NC_002703	69.681	376	110	4	576	949	8597	8970	3.07e-35	150
Scaffold_10645	KF751795	69.355	310	91	4	618	925	2009	1702	6.33e-25	116
Scaffold_10645	KF751793	69.355	310	91	4	618	925	3485	3178	6.33e-25	116
Scaffold_10645	NC_011104	73.451	113	30	0	606	718	33058	33170	8.24e-11	69.8
Scaffold_10645	NC_011104	81.395	43	8	0	845	887	33297	33339	0.011	42.8
Scaffold_10645	NC_009815	78.205	78	17	0	382	459	36077	36154	3.5e-09	64.4
Scaffold_10645	NC_003216	78.205	78	17	0	382	459	38782	38859	3.5e-09	64.4
Scaffold_10648	NC_019448	92.308	26	2	0	108	133	43231	43256	0.04	39.2
Scaffold_10648	NC_001270	82.222	45	6	2	202	245	1319	1276	0.04	39.2
Scaffold_10648	6.66667e+06	80.435	46	4	2	227	267	42313	42268	0.04	39.2
Scaffold_10651	JX181825	85.366	41	6	0	2564	2604	96275	96235	0.001	48.2
Scaffold_10651	AP013460	88.235	34	4	0	1381	1414	12763	12730	0.015	44.6
Scaffold_10652	NC_023582	88.571	35	3	1	212	246	21467	21434	0.012	42.8
Scaffold_10652	NC_011398	87.5	32	4	0	743	774	10481	10512	0.042	41
Scaffold_10658	NC_022914	70.214	1917	466	25	4	1878	13861	12008	0	865
Scaffold_10658	NC_022914	79.02	510	105	2	3164	3672	10527	10019	8.72e-119	430
Scaffold_10658	NC_022914	80.22	273	54	0	2713	2985	11041	10769	1.69e-64	250
Scaffold_10658	NC_019915	67.622	1047	304	18	2015	3043	26441	25412	5.88e-83	311
Scaffold_10658	NC_019915	74.884	215	54	0	1069	1283	27557	27343	5.17e-33	145
Scaffold_10658	NC_019915	73.554	121	32	0	2166	2286	26422	26302	7.68e-12	75.2
Scaffold_10658	NC_019915	75	80	20	0	653	732	27931	27852	7.19e-06	55.4
Scaffold_10658	NC_008617	72.727	385	99	1	1503	1887	29194	28816	2.35e-56	223
Scaffold_10658	KF831354	72.727	385	99	1	1503	1887	14131	14509	2.35e-56	223
Scaffold_10658	NC_005356	73.315	371	91	3	1503	1872	11502	11139	9.97e-55	217
Scaffold_10658	NC_013195	72.099	405	105	3	1503	1906	30191	29794	3.48e-54	215
Scaffold_10658	NC_021773	70.513	468	128	5	1503	1968	40480	40021	5.17e-52	208
Scaffold_10658	NC_021773	77	100	23	0	1214	1313	40673	40574	2.2e-12	77
Scaffold_10658	KJ596420	69.807	467	133	3	1503	1968	28896	28437	7.67e-50	201
Scaffold_10658	NC_012784	69.593	467	134	3	1503	1968	31688	31229	3.26e-48	196
Scaffold_10658	NC_012784	77	100	23	0	1214	1313	31884	31785	2.2e-12	77
Scaffold_10658	NC_008689	69.593	467	134	3	1503	1968	30372	29913	3.26e-48	196
Scaffold_10658	NC_008689	77	100	23	0	1214	1313	30568	30469	2.2e-12	77
Scaffold_10658	AP011956	69.593	467	134	3	1503	1968	30256	29797	3.26e-48	196
Scaffold_10658	NC_009812	68.772	285	86	1	307	588	12458	12174	1.07e-22	111
Scaffold_10658	NC_009812	79.31	58	12	0	1355	1412	11917	11860	8.76e-05	51.8
Scaffold_10658	NC_024387	68.07	285	88	1	307	588	12494	12210	5.53e-20	102
Scaffold_10658	NC_024387	80.435	46	9	0	1355	1400	11953	11908	0.045	42.8
Scaffold_10658	KF021268	75.424	118	29	0	345	462	26129	26012	5.18e-14	82.4
Scaffold_10658	NC_023582	69.101	178	46	4	291	465	22516	22345	1.39e-08	64.4
Scaffold_10658	AB609718	71.93	114	32	0	345	458	24327	24214	4.85e-08	62.6
Scaffold_10658	NC_024391	73.267	101	27	0	3566	3666	25468	25368	1.69e-07	60.8
Scaffold_10658	NC_019914	72.816	103	28	0	3575	3677	26316	26214	1.69e-07	60.8
Scaffold_10658	NC_019914	79.592	49	10	0	3403	3451	26488	26440	0.013	44.6
Scaffold_10658	NC_011614	70.213	141	38	2	3529	3667	26053	25915	1.69e-07	60.8
Scaffold_10658	NC_011614	70.833	120	35	0	2710	2829	26728	26609	5.91e-07	59
Scaffold_10658	NC_010808	70.833	120	35	0	2710	2829	28375	28256	5.91e-07	59
Scaffold_10658	NC_010808	68.794	141	40	2	3529	3667	27703	27565	8.76e-05	51.8
Scaffold_10658	NC_008722	67.293	266	75	9	3407	3666	10823	10564	5.91e-07	59
Scaffold_10658	NC_007051	68.902	164	49	2	1782	1944	12745	12583	5.91e-07	59
Scaffold_10658	NC_007049	70.833	120	35	0	2710	2829	11681	11562	5.91e-07	59
Scaffold_10658	NC_004615	70.833	120	35	0	2710	2829	28054	27935	5.91e-07	59
Scaffold_10658	NC_004615	68.085	141	41	2	3529	3667	27379	27241	0.004	46.4
Scaffold_10658	DQ530360	68.874	151	43	2	3529	3677	27488	27340	7.19e-06	55.4
Scaffold_10658	NC_017968	69.286	140	39	2	3530	3667	26033	26170	2.51e-05	53.6
Scaffold_10658	NC_017968	78.333	60	13	0	2713	2772	25360	25419	0.000306	50
Scaffold_10658	NC_013644	72.165	97	27	0	2720	2816	30537	30441	2.51e-05	53.6
Scaffold_10658	NC_021332	71.287	101	29	0	3566	3666	26598	26498	8.76e-05	51.8
Scaffold_10658	NC_008798	68.794	141	40	2	3529	3667	27074	26936	8.76e-05	51.8
Scaffold_10658	NC_008798	76.056	71	17	0	2710	2780	27749	27679	8.76e-05	51.8
Scaffold_10658	NC_008583	76.056	71	17	0	2710	2780	28166	28096	8.76e-05	51.8
Scaffold_10658	NC_008583	68.085	141	41	2	3529	3667	27491	27353	0.004	46.4
Scaffold_10658	NC_007050	69.492	118	36	0	2713	2830	11785	11668	8.76e-05	51.8
Scaffold_10658	NC_007050	68.085	141	41	2	3529	3667	11116	10978	0.004	46.4
Scaffold_10658	NC_007048	76.056	71	17	0	2710	2780	11628	11558	8.76e-05	51.8
Scaffold_10658	NC_007048	70.476	105	27	2	3565	3667	10917	10815	0.013	44.6
Scaffold_10658	JX274647	68.794	141	40	2	3529	3667	26811	26673	8.76e-05	51.8
Scaffold_10658	JX274647	76.471	68	15	1	2710	2777	27483	27417	0.001	48.2
Scaffold_10658	NC_022767	71.91	89	25	0	302	390	35018	34930	0.001	48.2
Scaffold_10658	NC_014460	69.014	142	38	4	3529	3667	8534	8396	0.004	46.4
Scaffold_10658	NC_014460	74.603	63	16	0	2710	2772	9209	9147	0.045	42.8
Scaffold_10658	JX274646	76.19	63	15	0	2710	2772	28447	28385	0.004	46.4
Scaffold_10658	NC_019507	82.927	41	7	0	1938	1978	61697	61657	0.045	42.8
Scaffold_10658	NC_007057	74.603	63	16	0	2743	2805	11179	11117	0.045	42.8
Scaffold_10658	HM246722	82.927	41	7	0	1938	1978	23016	23056	0.045	42.8
Scaffold_10658	FN667789	82.927	41	7	0	1938	1978	149212	149172	0.045	42.8
Scaffold_10658	FN667788	82.927	41	7	0	1938	1978	150056	150016	0.045	42.8
Scaffold_1066	NC_023719	76.786	56	13	0	271	326	47443	47388	0.005	42.8
Scaffold_1066	AP013439	83.784	37	6	0	195	231	33613	33649	0.019	41
Scaffold_10662	NC_024387	92.593	27	2	0	292	318	653	679	0.019	41
Scaffold_10664	NC_009231	73.913	69	18	0	2111	2179	27264	27196	0.011	44.6
Scaffold_10664	NC_004629	81.633	49	5	2	1540	1584	109517	109469	0.038	42.8
Scaffold_10666	NC_024143	92.857	28	1	1	31	58	39950	39976	0.035	39.2
Scaffold_10666	NC_023692	80.488	41	8	0	99	139	2650	2610	0.035	39.2
Scaffold_10666	NC_022975	92.857	28	1	1	31	58	40506	40532	0.035	39.2
Scaffold_10666	6.66667e+06	92.857	28	1	1	31	58	40296	40322	0.035	39.2
Scaffold_10666	6.66667e+06	92.857	28	1	1	31	58	80507	80481	0.035	39.2
Scaffold_10667	NC_009237	80.851	47	6	1	1311	1354	13429	13475	0.023	42.8
Scaffold_10670	KJ802832	92.857	28	2	0	144	171	11421	11448	0.007	42.8
Scaffold_10679	NC_009812	72.109	147	38	2	1150	1293	10295	10149	8.71e-12	75.2
Scaffold_10679	KM051843	70.297	101	18	2	1152	1240	108864	108964	0.000347	50
Scaffold_10679	NC_020081	71.264	87	25	0	1154	1240	101220	101306	0.015	44.6
Scaffold_10679	665883	78.846	52	11	0	771	822	13718	13667	0.015	44.6
Scaffold_1068	NC_018087	90.625	32	3	0	2334	2365	85518	85487	0.013	44.6
Scaffold_10680	NC_020863	72.619	84	20	2	57	140	57921	57841	0.004	42.8
Scaffold_10680	KC182548	88.235	34	3	1	311	344	8329	8361	0.015	41
Scaffold_10687	NC_009760	93.333	30	1	1	1556	1584	109834	109863	0.049	42.8
Scaffold_1069	NC_019516	80.247	81	16	0	24201	24281	32122	32042	5.32e-11	75.2
Scaffold_1069	NC_015288	76.238	101	24	0	24202	24302	161145	161245	5.32e-11	75.2
Scaffold_1069	NC_021072	74.766	107	27	0	24198	24304	133939	134045	6.49e-10	71.6
Scaffold_1069	NC_015289	74.766	107	27	0	24198	24304	103739	103633	6.49e-10	71.6
Scaffold_1069	NC_008296	77.778	81	18	0	24202	24282	106613	106533	2.76e-08	66.2
Scaffold_1069	NC_021071	73.404	94	25	0	24211	24304	119877	119970	1.43e-05	57.2
Scaffold_1069	NC_013085	90.244	41	4	0	24229	24269	80708	80748	1.43e-05	57.2
Scaffold_1069	NC_023587	77.143	70	16	0	24202	24271	102228	102159	4.99e-05	55.4
Scaffold_1069	NC_015253	84.783	46	6	1	15521	15566	3203	3159	0.007	48.2
Scaffold_10696	NC_024205	87.5	32	4	0	296	327	151192	151223	0.014	41
Scaffold_10699	NC_019443	87.5	32	4	0	265	296	116740	116771	0.02	41
Scaffold_1070	NC_007917	86.842	38	3	1	5617	5652	1368	1331	0.022	44.6
Scaffold_10701	NC_014660	100	22	0	0	770	791	68263	68242	0.046	41
Scaffold_10701	NC_001270	78.723	47	10	0	1026	1072	1240	1194	0.046	41
Scaffold_10701	AP013563	88.235	34	3	1	701	734	23118	23150	0.046	41
Scaffold_10704	NC_007581	92.593	27	2	0	332	358	107586	107560	0.017	41
Scaffold_10706	NC_019526	87.805	41	3	2	332	371	21150	21189	0.001	44.6
Scaffold_10707	AP013376	85.294	34	5	0	9	42	8335	8302	0.03	39.2
Scaffold_10708	NC_017732	84.906	53	8	0	113	165	1425	1477	2.38e-08	60.8
Scaffold_10708	NC_021802	76.562	64	11	2	142	201	3678	3615	0.006	42.8
Scaffold_10708	NC_021799	76.562	64	11	2	142	201	5513	5450	0.006	42.8
Scaffold_10708	NC_019400	92.593	27	2	0	395	421	67528	67502	0.022	41
Scaffold_10709	JF731128	100	23	0	0	79	101	15666	15688	0.004	42.8
Scaffold_10709	AP013520	82.222	45	7	1	82	125	28363	28407	0.004	42.8
Scaffold_1071	233894	85.714	56	8	0	1009	1064	64465	64410	1.19e-09	66.2
Scaffold_1071	NC_019516	82.812	64	10	1	1006	1069	28884	28946	1.45e-08	62.6
Scaffold_1071	NC_023717	78.082	73	16	0	1005	1077	148137	148209	5.08e-08	60.8
Scaffold_1071	NC_023717	74.684	79	16	3	1009	1084	150957	151034	0.014	42.8
Scaffold_1071	NC_015251	77.922	77	16	1	1002	1077	113820	113896	1.77e-07	59
Scaffold_1071	NC_019503	80	60	12	0	1008	1067	69448	69389	2.16e-06	55.4
Scaffold_1071	NC_019399	80	60	12	0	1008	1067	68636	68577	2.16e-06	55.4
Scaffold_1071	NC_015289	81.818	55	10	0	1009	1063	161706	161760	2.16e-06	55.4
Scaffold_1071	NC_015289	75	64	15	1	1006	1069	15317	15379	0.048	41
Scaffold_1071	NC_015279	81.667	60	10	1	1008	1067	141337	141395	2.16e-06	55.4
Scaffold_1071	JX128259	80	60	12	0	1008	1067	68819	68760	2.16e-06	55.4
Scaffold_1071	NC_015288	79.688	64	12	1	1006	1069	163578	163640	7.53e-06	53.6
Scaffold_1071	NC_015285	79.688	64	12	1	1006	1069	14338	14400	7.53e-06	53.6
Scaffold_1071	HQ317290	79.688	64	12	1	1006	1069	13798	13860	7.53e-06	53.6
Scaffold_1071	NC_023587	78.125	64	13	1	1006	1069	152669	152731	9.18e-05	50
Scaffold_1071	NC_022096	80	55	11	0	1009	1063	120235	120289	9.18e-05	50
Scaffold_1071	NC_022096	90.323	31	3	0	1093	1123	120228	120258	0.014	42.8
Scaffold_1071	NC_019529	74.667	75	19	0	1005	1079	40434	40508	9.18e-05	50
Scaffold_1071	NC_020837	77.143	70	14	2	1007	1075	74198	74130	0.00032	48.2
Scaffold_1071	NC_021782	77.465	71	13	3	1004	1071	61657	61727	0.001	46.4
Scaffold_1071	NC_021772	77.465	71	13	3	1004	1071	66788	66858	0.001	46.4
Scaffold_1071	HQ630627	80.702	57	9	2	1009	1063	294930	294874	0.001	46.4
Scaffold_1071	HM137666	76.667	60	14	0	1008	1067	72082	72023	0.001	46.4
Scaffold_1071	HE956711	76.667	60	14	0	1008	1067	69211	69152	0.001	46.4
Scaffold_1071	AP011113	76.667	60	14	0	1008	1067	68922	68863	0.001	46.4
Scaffold_1071	NC_021530	77.049	61	13	1	1006	1066	14512	14571	0.004	44.6
Scaffold_1071	NC_023719	71.795	78	22	0	1001	1078	59295	59372	0.014	42.8
Scaffold_1071	NC_019929	78.431	51	11	0	1009	1059	169226	169276	0.014	42.8
Scaffold_1071	NC_015286	74.286	70	17	1	1006	1075	17793	17861	0.014	42.8
Scaffold_1071	NC_012530	76.786	56	13	0	1008	1063	27825	27770	0.014	42.8
Scaffold_1071	KC954775	96.154	26	1	0	1097	1122	122731	122756	0.014	42.8
Scaffold_1071	NC_024125	75	60	15	0	1008	1067	56820	56761	0.048	41
Scaffold_1071	NC_023584	75	64	15	1	1006	1069	13864	13926	0.048	41
Scaffold_1071	NC_021536	75	64	15	1	1006	1069	4935	4997	0.048	41
Scaffold_1071	NC_008296	75	64	15	1	1006	1069	15977	16039	0.048	41
Scaffold_1071	6.66667e+06	100	22	0	0	1099	1120	62427	62448	0.048	41
Scaffold_10713	NC_014661	90.625	32	2	1	165	195	13975	14006	0.029	41
Scaffold_10715	NC_020883	93.457	2965	133	6	1737	4658	5263	2317	0	4500
Scaffold_10715	NC_020883	95.198	1645	79	0	1	1645	6908	5264	0	2610
Scaffold_10715	NC_020883	76.19	84	20	0	1074	1157	5752	5835	6.43e-08	62.6
Scaffold_10715	NC_004166	82.053	1744	313	0	2420	4163	29994	28251	0	1734
Scaffold_10715	NC_020081	75.862	116	28	0	3448	3563	144943	144828	1.97e-14	84.2
Scaffold_10715	JX976549	88	50	5	1	1028	1076	24649	24698	2.24e-07	60.8
Scaffold_10715	NC_023599	83.636	55	6	1	1015	1069	31512	31461	2.73e-06	57.2
Scaffold_10715	NC_022771	72.917	96	26	0	3458	3553	13451	13546	2.73e-06	57.2
Scaffold_10715	NC_021856	72.917	96	26	0	3458	3553	15947	16042	2.73e-06	57.2
Scaffold_10715	AB091475	72.917	96	26	0	3458	3553	600	505	2.73e-06	57.2
Scaffold_10715	NC_018085	90	40	4	0	1030	1069	31887	31848	9.54e-06	55.4
Scaffold_10715	HE614282	90	40	4	0	1030	1069	33274	33235	9.54e-06	55.4
Scaffold_10715	NC_007055	91.892	37	3	0	1032	1068	37000	36964	3.33e-05	53.6
Scaffold_10715	NC_007055	72.549	102	24	3	4704	4801	34893	34792	0.001	48.2
Scaffold_10715	NC_016767	84.444	45	7	0	1026	1070	54386	54342	0.000406	50
Scaffold_10715	NC_016767	91.429	35	3	0	1023	1057	54377	54343	0.000406	50
Scaffold_10715	KJ545483	86.364	44	3	2	1028	1071	29733	29693	0.005	46.4
Scaffold_10715	NC_019923	90.625	32	3	0	1038	1069	36856	36825	0.017	44.6
Scaffold_10715	KJ817802	88.889	36	3	1	1042	1076	8687	8722	0.017	44.6
Scaffold_10716	HM246720	86.486	37	4	1	441	477	32973	32938	0.025	41
Scaffold_10717	NC_020883	90.777	206	19	0	1	206	43192	42987	1.16e-76	286
Scaffold_1072	NC_008689	69.466	393	104	8	2443	2830	40184	40565	8.13e-33	147
Scaffold_1072	NC_022769	77.612	67	15	0	17537	17603	122505	122439	0.000138	53.6
Scaffold_1072	KJ489402	77.612	67	15	0	17537	17603	120302	120236	0.000138	53.6
Scaffold_1072	NC_023550	93.75	32	2	0	17923	17954	9111	9080	0.002	50
Scaffold_1072	6.66667e+06	82	50	9	0	1127	1176	106623	106672	0.002	50
Scaffold_1072	NC_015254	89.474	38	3	1	4396	4433	11941	11977	0.006	48.2
Scaffold_10720	NC_001884	67.959	490	143	7	432	914	34684	35166	2.16e-37	158
Scaffold_10726	NC_023719	83.333	42	7	0	273	314	180603	180562	0.003	44.6
Scaffold_10726	NC_023719	82.222	45	6	1	469	513	180416	180374	0.01	42.8
Scaffold_10728	KJ473423	88.095	42	2	2	493	531	34546	34505	0.000507	48.2
Scaffold_10728	NC_013644	86.111	36	5	0	228	263	26934	26899	0.022	42.8
Scaffold_1073	KF296717	73.504	117	31	0	34192	34308	1785	1901	1.12e-09	71.6
Scaffold_1073	KF296717	72.881	118	32	0	33619	33736	1212	1329	3.91e-09	69.8
Scaffold_1073	NC_015290	69.872	156	47	0	19547	19702	151080	151235	3.91e-09	69.8
Scaffold_1073	NC_015290	77.273	66	15	0	17955	18020	104453	104518	0.001	51.8
Scaffold_1073	NC_019726	82.609	46	8	0	22093	22138	135953	135908	0.013	48.2
Scaffold_1073	NC_019448	82.609	46	8	0	22093	22138	94168	94213	0.013	48.2
Scaffold_1073	NC_022771	88.571	35	4	0	32696	32730	2997	2963	0.045	46.4
Scaffold_1073	NC_022771	88.571	35	4	0	32696	32730	155437	155403	0.045	46.4
Scaffold_10730	NC_018087	86.486	37	5	0	416	452	148679	148715	0.003	44.6
Scaffold_10730	NC_019422	100	23	0	0	401	423	17238	17260	0.009	42.8
Scaffold_10731	1.13303e+06	100	22	0	0	86	107	8513	8534	0.035	41
Scaffold_10734	NC_023582	77.049	61	12	2	913	972	4771	4712	0.042	41
Scaffold_10735	KM224879	87.879	33	3	1	111	142	18357	18325	0.033	39.2
Scaffold_10738	NC_009018	80	50	8	2	290	337	38445	38396	0.048	39.2
Scaffold_1074	NC_022776	84.211	38	6	0	1661	1698	21848	21885	0.037	42.8
Scaffold_10742	NC_021072	88.889	36	4	0	1	36	35548	35583	0.000127	48.2
Scaffold_10742	NC_014457	81.132	53	9	1	58	109	56794	56742	0.000127	48.2
Scaffold_10742	NC_020877	87.5	40	4	1	150	189	73457	73419	0.000442	46.4
Scaffold_10742	NC_023719	84.615	39	5	1	155	193	354854	354817	0.019	41
Scaffold_10742	HQ317290	85.714	35	5	0	1	35	18163	18129	0.019	41
Scaffold_10744	GU229986	68.156	179	57	0	283	461	48938	48760	5.7e-10	66.2
Scaffold_10744	NC_011167	66.667	228	74	2	274	500	8816	8590	6.94e-09	62.6
Scaffold_10746	FJ848883	74.603	63	13	1	126	185	10409	10471	0.009	41
Scaffold_10747	NC_021802	92.857	28	2	0	85	112	39	66	0.002	42.8
Scaffold_10747	NC_021799	92.857	28	2	0	85	112	1135	1162	0.002	42.8
Scaffold_10748	NC_022758	70.476	210	62	0	1	210	10102	9893	1.39e-20	100
Scaffold_10748	NC_019513	70.476	210	62	0	1	210	35433	35642	1.39e-20	100
Scaffold_10748	NC_011612	70.476	210	62	0	1	210	30042	29833	1.39e-20	100
Scaffold_10748	NC_002661	70.476	210	62	0	1	210	26833	26624	1.39e-20	100
Scaffold_10748	NC_021323	69.524	210	64	0	1	210	29674	29465	7.18e-18	91.5
Scaffold_10748	NC_007053	67.871	249	80	0	1	249	10161	9913	2.51e-17	89.7
Scaffold_10748	NC_020199	69.048	210	65	0	1	210	30796	30587	3.05e-16	86
Scaffold_10748	NC_007054	69.048	210	65	0	1	210	10092	9883	3.05e-16	86
Scaffold_10748	NC_007052	69.048	210	65	0	1	210	10091	9882	3.05e-16	86
Scaffold_10748	JX174275	69.048	210	65	0	1	210	10092	9883	3.05e-16	86
Scaffold_10748	NC_018086	65.517	203	64	2	71	270	16169	15970	7.67e-05	48.2
Scaffold_10749	NC_022758	75.347	288	65	3	88	372	9530	9814	3.89e-48	192
Scaffold_10749	NC_020199	75	288	66	3	88	372	30224	30508	1.65e-46	187
Scaffold_10749	NC_007054	75	288	66	3	88	372	9520	9804	1.65e-46	187
Scaffold_10749	NC_007052	75	288	66	3	88	372	9519	9803	1.65e-46	187
Scaffold_10749	JX174275	75	288	66	3	88	372	9520	9804	1.65e-46	187
Scaffold_10749	NC_021323	74.828	290	63	4	88	372	29102	29386	5.77e-46	185
Scaffold_10749	NC_019513	74.828	290	63	4	88	372	36005	35721	5.77e-46	185
Scaffold_10749	NC_011612	74.828	290	63	4	88	372	29470	29754	5.77e-46	185
Scaffold_10749	NC_002661	74.828	290	63	4	88	372	26261	26545	5.77e-46	185
Scaffold_10749	NC_007053	74.306	288	68	3	88	372	9589	9873	8.57e-44	178
Scaffold_1075	AJ245616	87.879	33	4	0	941	973	12227	12259	0.024	42.8
Scaffold_10752	NC_004735	92.308	26	2	0	65	90	31243	31218	0.036	39.2
Scaffold_10753	AP013502	84.211	38	6	0	273	310	22404	22367	0.019	42.8
Scaffold_10757	NC_019913	88.235	34	3	1	140	173	29084	29116	0.011	41
Scaffold_10757	NC_019450	88.235	34	3	1	140	173	30885	30917	0.011	41
Scaffold_10757	NC_015294	88.235	34	3	1	140	173	5544	5576	0.011	41
Scaffold_10759	KF114878	96	25	1	0	265	289	9293	9269	0.013	41
Scaffold_1076	NC_019399	83.333	36	6	0	168	203	37410	37375	0.047	39.2
Scaffold_1076	HE956711	83.333	36	6	0	168	203	36021	35986	0.047	39.2
Scaffold_10760	NC_015568	87.5	32	4	0	179	210	1782	1751	0.045	41
Scaffold_10762	NC_015254	88	75	9	0	309	383	40876	40802	1.9e-18	95.1
Scaffold_10762	NC_022771	81.818	55	10	0	320	374	31630	31576	1.67e-06	55.4
Scaffold_10762	NC_021856	81.818	55	10	0	320	374	33810	33756	1.67e-06	55.4
Scaffold_10762	NC_012663	82.456	57	9	1	319	374	59552	59608	1.67e-06	55.4
Scaffold_10762	NC_020081	80.702	57	11	0	319	375	122485	122541	5.83e-06	53.6
Scaffold_10762	KM051843	80.702	57	11	0	319	375	132761	132817	5.83e-06	53.6
Scaffold_10762	KM051843	79.31	58	11	1	317	373	129928	129985	0.000248	48.2
Scaffold_10762	NC_016571	83.333	48	8	0	317	364	16837	16884	2.04e-05	51.8
Scaffold_10762	NC_015253	80	60	10	1	316	373	25609	25668	2.04e-05	51.8
Scaffold_10762	NC_021529	80	55	10	1	320	373	228991	229045	0.000866	46.4
Scaffold_10762	NC_015294	71.111	90	26	0	295	384	92367	92278	0.000866	46.4
Scaffold_10762	KF301602	79.661	59	10	2	308	365	143897	143954	0.000866	46.4
Scaffold_10762	NC_016653	77.586	58	12	1	319	375	45023	44966	0.011	42.8
[truncated: 43,353 more rows]

## Sheet: JJ
Supplementary Table S6. MetaPhinder derived identification of bacteriophage signatures in the metagenomics scaffolds (JJ)
[truncated: 43,625 more rows]
