# Supplementary material for: Metagenomic Insights Into the Taxonomic and Functional Features of Kinema, a Traditional Fermented Soybean Product of Sikkim Himalaya
Source: Front Microbiol. 2019 Aug 2;10:1744. doi: 10.3389/fmicb.2019.01744 (PMC6688588; doi:10.3389/fmicb.2019.01744)
Supplement: Supplementary file 7 [file Table_7.XLSX]

## Sheet: Supplementary Table S7
Supplementary Table S7. Taxonomical (Order and family, genus, species and no rank) structure of phages present in kinema metagenome
		Order and family						Genus						Species						No rank
Taxomic level	SO	DJ	MA	JJ		Taxomic level	SO	DJ	MA	JJ		Taxomic level	SO	DJ	MA	JJ		Taxomic level	SO	DJ	MA	JJ
Order:"Caudovirales"	98	92	108	96		Genus:"Phietavirus"	58	24	73	61		Species:"Bacillus virus G"	117	115	118	121		No_rank:"unclassified Siphoviridae"	157	214	158	225
Family:"Siphoviridae"	127	100	128	107		Genus:"Nit1virus"	49	5	15	25		Species:"Bacillus virus SPbeta"	92	86	167	63		No_rank:"unclassified Myoviridae"	67	79	81	78
Family:"Myoviridae"	84	86	88	82		Genus:"Kayvirus"	39	7	13	17		Species:"Bacillus phage phi105"	75	44	58	50		No_rank:"Staphylococcus phage vB_SepS_SEP9"	35	7	10	14
Family:"Podoviridae"	14	17	12	19		Genus:"Triavirus"	21	9	14	13		Species:"Staphylococcus phage phiRS7"	53	5	20	51		No_rank:"Viruses"	22	29	27	20
Family:"Tectiviridae"	0	8	0	0		Genus:"Biseptimavirus"	17	7	9	11		Species:"Bacillus phage proCM3"	33	193	49	26		No_rank:"unclassified bacterial viruses"	18	14	20	14
						Genus:"Phifelvirus"	14	16	9	22		Species:"Staphylococcus phage StB20"	32	0	10	16		No_rank:"Bacillus phage Grass"	16	0	0	0
						Genus:"Silviavirus"	14	5	0	10		Species:"Streptococcus phage phiD12"	31	32	30	33		No_rank:"Staphylococcus phage phiIBB-SEP1"	16	0	6	7
						Genus:"Agatevirus"	8	0	0	0		Species:"Staphylococcus phage Pvl108"	28	11	51	36		No_rank:"unclassified dsDNA phages"	16	15	14	21
						Genus:"Cp220virus"	8	10	5	14		Species:"uncultured Mediterranean phage uvMED"	27	34	28	40		No_rank:"unclassified P68virus"	16	5	0	8
						Genus:"Cd119virus"	6	8	6	10		Species:"Cronobacter phage vB_CsaM_GAP32"	26	30	32	27		No_rank:"unclassified Podoviridae"	16	7	6	22
						Genus:"Cecivirus"	6	24	5	0		Species:"Enterococcus phage phiEf11"	22	12	0	23		No_rank:"Bacillus phage phiNIT1"	14	16	0	0
						Genus:"Schizot4virus"	6	0	5	0		Species:"Staphylococcus phage 37"	19	0	9	9		No_rank:"dsDNA viruses, no RNA stage"	14	21	23	11
						Genus:"T4virus"	6	3	5	3		Species:"Staphylococcus phage 2638A"	18	0	12	10		No_rank:"Tevenvirinae"	13	13	10	22
						Genus:"Cp8virus"	5	6	7	7		Species:"Staphylococcus phage PT1028"	16	0	10	8		No_rank:"unclassified Biseptimavirus"	13	5	6	11
						Genus:"Lambdavirus"	1	0	1	6		Species:"Clostridium phage c-st"	15	20	11	14		No_rank:"Enterococcus phage phiFL3B"	11	11	7	23
						Genus:"Andromedavirus"	0	4	0	0		Species:"Lactococcus phage ul36"	15	12	0	20		No_rank:"Enterococcus phage phiEF24C-P2"	10	15	12	14
						Genus:"B4virus"	0	2	0	0		Species:"Streptococcus phage Dp-1"	13	11	13	9		No_rank:"unclassified Caudovirales"	10	11	7	6
						Genus:"Bc431virus"	0	4	0	0		Species:"Bacillus phage 0305phi8-36"	12	22	19	12		No_rank:"Spounavirinae"	9	9	17	14
						Genus:"Biquartavirus"	0	0	0	0		Species:"Bacillus phage BCJA1c"	11	9	7	18		No_rank:"unclassified T4virus"	9	6	10	11
						Genus:"Cp51virus"	0	5	0	0		Species:"Bacillus phage PM1"	10	14	55	16		No_rank:"Bacillus phage BCU4"	6	5	0	0
						Genus:"N4virus"	0	0	0	0		Species:"Bacillus phage SP-10"	10	9	16	0		No_rank:"Enterococcus phage phiFL1B"	6	0	0	0
						Genus:"P100virus"	0	0	0	0		Species:"Enterobacteria phage vB_KleM-RaK2"	10	12	17	7		No_rank:"Escherichia phage phi191 sensu lato"	3	3	10	13
						Genus:"P1virus"	0	0	0	0		Species:"Lactococcus phage P087"	10	9	11	8		No_rank:"Picovirinae"	3	1	5	3
						Genus:"P2virus"	0	5	0	0		Species:"Prochlorococcus phage P-SSM2"	10	11	7	13		No_rank:"unclassified Lambda-like viruses"	2	5	2	5
						Genus:"P68virus"	0	1	0	0		Species:"Staphylococcus phage 42E"	10	0	15	8		No_rank:"unclassified Phietalikevirus"	2	7	8	19
						Genus:"Sep1virus"	0	0	0	0		Species:"Aeromonas virus 44RR2"	9	11	16	12		No_rank:"Bacillus phage Spock"	0	4	0	0
						Genus:"Sextaecvirus"	0	0	0	0		Species:"Lactococcus phage phiL47"	9	5	5	0		No_rank:"Bacillus phage Staley"	0	5	10	0
						Genus:"Sk1virus"	0	4	5	9		Species:"Listeria phage B054"	9	5	0	15		No_rank:"Enterobacteria phage P7"	0	5	0	0
						Genus:"Slashvirus"	0	0	0	0		Species:"Brochothrix phage BL3"	8	16	10	17		No_rank:"Enterococcus phage phiFL1A"	0	0	0	0
						Genus:"Spbetavirus"	0	0	0	0		Species:"Staphylococcus phage Twort"	8	0	0	7		No_rank:"Enterococcus phage phiFL3A"	0	0	0	0
						Genus:"Spo1virus"	0	0	0	0		Species:"Bacillus phage BCD7"	7	10	7	12		No_rank:"environmental samples <viruses>"	0	0	0	0
						Genus:"Tsarbombavirus"	0	0	0	0		Species:"Bacillus phage Gamma"	7	34	9	8		No_rank:"Eucampyvirinae"	0	1	1	1
						Genus:"Twortvirus"	0	0	0	0		Species:"Enterococcus phage phiFL4A"	7	11	7	16		No_rank:"Peduovirinae"	0	2	5	0
						Genus:"Wphvirus"	0	6	0	0		Species:"Escherichia phage PBECO 4"	7	4	0	8		No_rank:"root"	0	0	1	1
												Species:"Lactobacillus virus Lb338-1"	7	5	0	10		No_rank:"Staphylococcus phage JD007"	0	0	5	0
												Species:"Prochlorococcus phage P-SSM7"	7	5	9	7		No_rank:"unassigned Myoviridae"	0	0	0	0
												Species:"Staphylococcus phage EW"	7	0	10	8		No_rank:"unassigned Spounavirinae"	0	2	5	0
												Species:"Staphylococcus phage Ipla5"	7	0	0	0		No_rank:"unclassified N4likevirus"	0	0	5	0
												Species:"Staphylococcus phage StB12"	7	0	7	0		No_rank:"unclassified Spounavirinae"	0	0	0	0
												Species:"Acinetobacter phage ZZ1"	6	0	0	0
												Species:"Mycoplasma phage phiMFV1"	6	9	9	9
												Species:"Staphylococcus phage StauST398-5"	6	5	11	0
												Species:"Staphylococcus phage StB27"	6	0	0	0
												Species:"Streptococcus phage phi30c"	6	6	0	11
												Species:"Bacillus phage SPP1"	5	9	13	0
												Species:"Bacillus virus SPO1"	5	0	0	0
												Species:"Brochothrix phage A9"	5	0	0	0
												Species:"Brochothrix phage NF5"	5	18	0	15
												Species:"Listeria phage LP-101"	5	0	0	0
												Species:"Sphingomonas phage PAU"	5	0	0	0
												Species:"Bacillus phage Basilisk"	0	0	5	0
												Species:"Bacillus phage Hoody T"	0	5	0	0
												Species:"Bacillus phage MG-B1"	0	4	0	0
												Species:"Bacillus phage phIS3501"	0	13	0	0
												Species:"Bacillus phage vB_BanS-Tsamsa"	0	5	8	0
												Species:"Bacillus phage Waukesha92"	0	9	0	0
												Species:"Bacillus virus 250"	0	12	0	0
												Species:"Bacillus virus BCP78"	0	0	0	0
												Species:"Bacillus virus Grass"	0	0	0	0
												Species:"Bacillus virus IEBH"	0	4	0	0
												Species:"Bacillus virus NIT1"	0	0	0	0
												Species:"Bacillus virus Spock"	0	0	0	0
												Species:"Bacillus virus Staley"	0	0	0	0
												Species:"Cellulophaga phage phi14:2"	0	5	8	0
												Species:"Clostridium phage CDMH1"	0	5	6	10
												Species:"Clostridium phage phi3626"	0	5	0	0
												Species:"Clostridium phage phiSM101"	0	0	0	8
												Species:"Clostridium phage vB_CpeS-CP51"	0	6	0	11
												Species:"Enterobacteria phage phi92"	0	9	6	7
												Species:"Enterococcus phage EF62phi"	0	6	0	9
												Species:"Enterococcus phage IME-EFm1"	0	6	6	0
												Species:"Enterococcus phage phiEF24C"	0	0	0	0
												Species:"Enterococcus virus FL1"	0	0	0	0
												Species:"Enterococcus virus FL3"	0	0	0	0
												Species:"Erwinia phage PhiEaH1"	0	0	8	0
												Species:"Escherichia virus P1"	0	0	0	0
												Species:"Flavobacterium phage 6H"	0	5	5	10
												Species:"Geobacillus phage GBK2"	0	6	0	0
												Species:"Geobacillus virus E2"	0	0	5	0
												Species:"Lactobacillus phage LF1"	0	0	0	7
												Species:"Lactococcus phage P335 sensu lato"	0	5	0	0
												Species:"Lactococcus phage TP901-1"	0	4	0	0
												Species:"Listeria phage A118"	0	0	6	7
												Species:"Listeria phage B025"	0	7	7	11
												Species:"Listeria virus P100"	0	0	15	11
												Species:"Microbacterium phage Min1"	0	0	6	0
												Species:"Planktothrix phage PaV-LD"	0	5	7	7
												Species:"Staphylococcus phage 187"	0	4	0	0
												Species:"Staphylococcus phage Ipla88"	0	0	5	0
												Species:"Staphylococcus virus JD7"	0	0	0	0
												Species:"Staphylococcus virus SEP1"	0	0	0	0
												Species:"Staphylococcus virus SEP9"	0	0	0	0
												Species:"Streptococcus phage LYGO9"	0	5	0	0
												Species:"Streptococcus phage phi3396"	0	5	5	0
												Species:"Synechococcus phage S-PM2"	0	0	5	0
												Species:"Thermus phage phi OH2"	0	0	10	0
